# Supplementary material for: Subtype-specific kinase dependency regulates growth and metastasis of poor-prognosis mesenchymal colorectal cancer
Source: J Exp Clin Cancer Res. 2023 Mar 3;42:56. doi: 10.1186/s13046-023-02600-9 (PMC9983221; doi:10.1186/s13046-023-02600-9)
Supplement: Supplementary file 9 — Additional file 9: Table S2. Results from analysis of CRISPR-Cas9 drop-out screen representing the fold change within each replicate of sgRNA counts between t1 and t0. [file 13046_2023_2600_MOESM9_ESM.xlsx]

## Sheet: Sheet1
FC represents fold change within each replicate of raw sgRNA counts between t1 and t0. Raw data is available in supplementary table 1.
Colour codes
	> 0 < 0,15
	> 0,15 < 0,30
	> 0,30 < 0,50
	> 0,50 < 0,65
	> 0,65 < 0,75
	> 0,75 < 1,8
	> 1,80001
			Colo320-HSR			HCT116			HT55			Hutu-80			KM12			LS1034			LS180			LS513			MDST8			OUMS-23			RCM-1			RKO			SW48			SW948
NORMALISED READ COUNTS			FOLD CHANGES			FOLD CHANGES			FOLD CHANGES			FOLD CHANGES			FOLD CHANGES			FOLD CHANGES			FOLD CHANGES			FOLD CHANGES			FOLD CHANGES			FOLD CHANGES			FOLD CHANGES			FOLD CHANGES			FOLD CHANGES			FOLD CHANGES
Tag	GeneSymbol	type	FC_r1	FC_r2	FC_r3	FC_r1	FC_r2	FC_r3	FC_r1	FC_r2	FC_r3	FC_r1	FC_r2	FC_r3	FC_r1	FC_r2	FC_r3	FC_r1	FC_r2	FC_r3	FC_r1	FC_r2	FC_r3	FC_r1	FC_r2	FC_r3	FC_r1	FC_r2	FC_r3	FC_r1	FC_r2	FC_r3	FC_r1	FC_r2	FC_r3	FC_r1	FC_r2	FC_r3	FC_r1	FC_r2	FC_r3	FC_r1_t1	FC_r2_t1	FC_r3_t1	FC_r1_t2	FC_r2_t2	FC_r3_t2
AAK1-1	AAK1	x	1.30862	0.642753	1.15125	0.822823	0.949349	1.02911	1.0764	1.00272	0.829071	0.767557	0.951111	1.02729	0.788595	1.56784	0.87404	1.03089	0.952381	0.8125	0.812389	1.10642	0.844797	0.963255	1.13602	1.11576	1.40553	0.630155	0.590106	0.976214	0.908907	0.844797	0.698462	0.741697	0.667183	1.26905	1.19735	1.23068	0.967546	0.961609	0.88296	1.07661	0.688543	0.985965	1.52531	0.949944	1.32982
AAK1-10	AAK1	x	0.963351	1.04286	0.868263	1.06579	1.17742	0.909548	1.49194	0.924303	1.39367	1.46462	1.06627	1.46087	1.59514	0.95	1.41317	3.0137	1.04494	1.32258	1.43312	1.02632	1.22472	1.08974	1.11215	1.06969	0.782152	0.738916	0.997658	1.33218	1.02273	1.22308	2.42775	0.12381	1.22807	0.605459	1.2875	0.746711	0.807229	1.11321	1.06061	1.68773	1.26415	0.953846	1.72119	1.18868	0.994872
AAK1-2	AAK1	x	0.884083	1.30189	1.13065	1.07269	0.990347	1.01507	1.24863	1.32208	1.0536	1.17724	1.40281	1.45133	0.93617	0.869497	0.898714	1.42647	1.03887	0.932862	1.40095	0.924561	1.51861	1.38527	1.05387	1.10858	1.51115	0.879121	1.45499	0.83778	0.950704	0.92891	0.895464	0.562602	1.35079	1.09219	1.00625	1.07832	1.23222	0.957774	1.06883	1.51645	1.1875	1.23522	1.08224	1.37652	1.20368
AAK1-3	AAK1	x	1.02067	1.12979	0.930788	0.771619	0.772234	0.85906	1.04038	1.07505	1.05906	0.861667	0.93988	0.616192	0.93736	0.736264	0.553942	0.809422	0.950904	0.603261	0.728311	0.914013	1.01351	1.10727	0.604962	0.924453	0.854911	0.633333	0.747981	0.724541	0.784469	0.892739	1.60582	0.449405	1.29799	0.918759	0.79085	0.742484	0.83121	0.825243	0.657895	1.8349	0.752852	0.880716	2.45966	0.435361	0.701789
AAK1-4	AAK1	x	1.23139	1.28916	1.08255	1.06481	1.13131	1.18202	1.17138	0.912637	1.05075	1.00556	1.14979	1.03357	1.2166	1.58784	0.945155	0.884368	0.960784	1.04175	0.772616	1.10215	1.07353	0.832237	0.864734	1.12229	0.677941	0.565603	0.936535	0.861013	0.785714	1.2965	1.21053	1.00393	0.847458	1.02488	1.73942	1.0241	0.759901	0.50104	0.803571	0.732659	0.9296	1.25615	0.619942	0.712	1.2418
AAK1-5	AAK1	x	0.868627	0.482993	0.929577	0.948617	0.80083	0.921444	0.747731	0.767442	0.808475	1.0014	0.922551	0.924303	0.644898	0.930962	0.827993	0.89083	1.46556	0.830918	0.658314	0.803965	0.490486	0.743516	0.751524	0.762282	0.803974	0.711921	1.12794	0.888244	0.859773	0.796519	1.21296	1.42887	0.767932	0.781888	1.06902	0.984026	0.521951	1	0.93424	0.984351	0.611852	1.37318	0.85446	0.518519	1.30048
AAK1-6	AAK1	x	0.659686	0.873239	1.32258	0.832432	1.47586	1.125	0.805907	1.16418	1.45749	1.05751	1.09254	1.04746	1.45399	2.08383	1.09524	0.649573	1.7907	0.835052	1.15328	1.18817	1.01242	0.904762	1.5354	1.3547	2.4026	0.370213	0.987552	0.867052	1.3882	1.51178	1.1954	0.8867	1.02294	1.59414	1.10976	1.4141	0.962025	1.07303	0.752688	1.02893	1.39113	1.70438	1.22727	1.46371	1.25912
AAK1-7	AAK1	x	1.12179	0.909226	1.0778	1.04259	0.947455	1.08159	0.848761	1.08675	0.874154	1.02268	0.86971	0.754221	1.13314	1.072	1.12841	1.02401	1.15441	1.01571	1.01794	1.21532	0.88391	0.909326	1.32017	0.968937	0.97037	0.929526	1.13479	0.905232	0.991895	1.32175	1.7122	0.59375	1.29984	1.10213	0.837253	1.11514	1.0202	1.05989	0.893258	1.11371	1.27984	1.4675	1.42586	1.75199	1.295
AAK1-8	AAK1	x	0.794183	0.700873	2.56709	0.849057	0.904762	0.936675	0.89777	0.746296	1.10507	1.31631	0.836941	0.972403	1.03543	0.788764	0.914498	0.9941	1	0.918848	1.09399	1.03022	0.680851	0.853229	0.875494	0.594356	0.943114	0.613636	0.952632	1.30348	1.12077	0.766434	1.02267	1.56831	0.587264	0.784341	1.19493	0.984348	0.819572	0.77907	0.964286	1.41284	1.02545	1.09612	1.56147	1.4	1.05396
AAK1-9	AAK1	x	0.945471	0.704082	1.15693	1.08271	0.876909	0.859944	0.835913	0.995267	1.20275	0.901902	1.07444	1.04308	1.01784	1.04399	0.981563	1.00178	1.0596	1.23601	0.886	0.937365	0.868397	0.923633	0.789047	1.09737	0.659433	1.05552	0.924528	0.931265	0.782059	0.780905	0.667537	0.965182	0.750947	1.004	1.06	0.983436	0.892689	0.965594	0.908896	0.809227	1.43398	0.88388	1.02431	1.6575	0.741803
AATK-1	AATK	x	0.712401	0.520107	1.02778	1.00637	0.928571	0.949495	1.02	0.822727	0.992481	0.818386	0.574219	0.463277	1.14521	0.976636	1.12573	0.872781	0.805063	0.685015	0.715753	0.785714	0.673846	0.758065	1.16713	0.823285	0.469613	0.503212	0.311178	0.905844	0.774691	0.858238	0.580128	0.738411	0.92236	0.961089	1.57732	1.39952	1	0.748428	0.940351	0.989796	0.393145	0.791469	1.22245	0.556452	0.834123
AATK-10	AATK	x	1.15303	0.998775	0.844981	1.26448	0.843066	0.932203	0.574349	0.614085	0.624691	0.790244	0.740351	0.968354	1.09939	1.04218	0.852885	0.727901	1.12096	0.703867	0.891566	0.905542	0.876141	1.0405	0.851326	0.77758	0.794987	0.531965	0.584071	1.01448	0.933238	0.763636	0.446701	1.11124	0.602247	0.819287	1.27653	1.06272	0.851552	1.02147	0.704852	1.09117	0.770598	0.634129	1.33459	0.894992	0.92914
AATK-11	AATK	x	0.921622	0.653226	0.725594	0.951456	1.07174	0.925408	0.659319	0.981851	0.625475	0.741425	0.817091	0.891104	0.905172	1.17354	0.665579	1.41092	1.19207	1.36336	0.680365	0.821429	1.01484	1.06814	0.912541	1.36471	1.35747	0.794937	0.741359	0.914543	0.919332	1.11793	1.05952	0.730952	0.889182	0.689139	0.961017	0.987118	1.22078	1.1521	0.637566	1.23835	1.36842	0.977186	1.05197	1.08842	1.70342
AATK-2	AATK	x	0.5	0.680645	0.564516	1.04088	1.04396	1.02053	0.777465	0.7603	0.871795	0.83945	1.04918	0.615512	0.990625	1.17986	0.813889	0.590734	0.541833	0.795539	0.724242	0.450658	0.422343	0.678571	0.716312	0.870098	2.6166	0.914489	0.822551	1.35204	1.08557	0.909976	0.67234	0.757937	0.693989	1.1253	1.24494	0.84296	0.570909	0.79918	0.453815	0.876543	0.522346	2.16279	0.691358	0.759777	1.39018
AATK-3	AATK	x	1.28438	1.89716	1.15868	1.07207	0.983193	1.25733	1.37061	1.83242	1.31364	0.962199	1.2029	1.07083	1.097	1.58364	1.0614	1.30994	1.85061	1.21138	1.37421	1.62934	1.61986	1.2587	1.13006	1.52494	2.74679	1.04367	1.86628	1.51386	1.07867	0.924771	0.72488	0.462567	1.08176	1.27079	0.906028	1.28084	1.08824	1.02357	1.28972	2.10269	0.919908	1.1148	2.91932	0.924485	1.43878
AATK-4	AATK	x	1.4697	1.42105	1.7193	0.942149	1.18056	1.33654	0.487654	1.02116	1.16763	0.970339	1.07895	1.16456	1.14074	0.732143	1.82667	2.4375	1.2	1.00671	0.564626	0.824324	0.919355	0.944444	1.22901	1.40816	0.517766	3.14474	0.526316	0.791367	0.716102	1.64286	0.383234	0.890411	0.79021	1.10989	0.929577	0.589862	1.35772	0.715385	1.30909	0.746544	0.73743	0.87037	1.32719	0.715084	0.802469
AATK-5	AATK	x	0.928571	1.10056	0.396739	1.1677	0.988889	1.28289	1.16444	1.17578	1.47573	0.993506	1.27668	1.11647	0.489627	1.08442	1.2	1.065	1.12102	1.21354	1.15385	0.748428	1.16535	1	1.15341	1.21778	1.11489	2.55061	1.60204	1.28571	1.57143	0.900369	0.705263	1.96667	1.24855	1.05882	0.445238	0.693151	1.4491	0.802817	0.737805	1.23301	0.896825	0.655172	1.44175	0.670635	0.693487
AATK-6	AATK	x	0.775801	1.04682	0.83054	1.02058	0.936982	0.914573	0.706461	0.745351	0.925076	0.75369	0.78342	0.758788	0.720238	0.723539	0.806867	0.83871	0.859023	1.1097	0.690619	0.80705	0.685289	0.774725	0.810811	0.90566	1.53094	1.64698	0.732329	0.963228	0.747692	0.839687	0.994881	0.877651	1.20747	0.877574	0.973451	0.922105	0.808468	0.769088	0.973684	0.838371	1.23803	0.805361	0.780552	1.19425	0.952214
AATK-7	AATK	x	1.11183	1.11712	1.36142	1.08493	1.17162	1.1748	1.37389	1.08895	1.39456	1.46992	1.28398	1.15928	1.28139	1.12908	1.06743	1.14062	1.38182	1.58696	1.57831	1.54897	1.4267	1.20167	1.55405	1.20175	1.50514	1.90569	1.97015	0.849829	1.27309	1.21843	1.67775	1.2567	1.67269	1.15214	1.40864	0.963486	1.48744	1.28018	1.2885	1.48101	1.5064	1.44618	1.6094	1.62589	1.55382
AATK-8	AATK	x	0.949239	0.691964	1.50829	1.75385	1.31953	1.4881	1.49084	1.01923	0.498516	0.676829	0.993921	0.629969	1.33516	1.00976	0.964286	1.07109	1.19091	0.835821	1.36667	0.811594	1.96774	1.24255	1.46531	1.33469	0.710345	1.05941	1.19872	1.05014	0.99536	1.31657	0.707113	1.44749	0.966667	0.858896	1.86286	1.24611	1.29596	0.834123	0.764463	1.9278	0.611276	1.2509	1.06859	0.551929	1.51971
AATK-9	AATK	x	0.530414	0.746377	1.11111	1.12538	0.912329	0.882022	0.82716	0.515081	0.665953	0.704433	0.838235	0.821918	1.27666	0.980263	1.23193	1.26724	1.19198	0.728972	0.981413	0.873112	0.769886	0.92545	1.10526	1.2567	0.810909	1.13171	0.543066	1.18257	0.994614	0.983278	1.85337	0.695793	0.925824	0.983871	0.893305	1.11775	0.865385	1.00316	0.969178	1.02583	1.00375	1.17381	0.863469	1.48127	0.977427
ABL1-1	ABL1	x	1.01868	1.15412	1.09756	0.918963	1.0036	1.0423	0.931373	0.717418	0.649433	1.125	0.875979	0.904815	0.769648	0.863487	0.873343	1.16934	0.705212	0.824441	1.2479	1.26829	1.01512	0.743626	0.83682	0.888031	0.985677	0.564693	0.555901	1.05994	1.05662	1.06875	1.05649	1.22727	1.19672	0.940874	0.973783	0.898749	0.928	1.15126	0.986792	1.11985	1	1.01483	1.80541	1.39493	0.953028
ABL1-10	ABL1	x	1.19355	1.24336	0.436647	0.865285	1.3489	1.06075	0.718287	0.951334	0.9856	0.631001	0.765832	0.991585	0.73221	0.702492	0.856459	0.864173	0.6294	0.802657	0.701835	0.863747	1.26316	1.35182	0.580247	0.796296	0.556615	0.802963	0.66436	0.887615	1.14213	0.611814	0.784466	0.308748	1.16729	0.850407	0.777937	0.788752	1.12065	0.612554	0.903529	1.02954	0.825521	0.884555	0.955687	0.916667	0.99064
ABL1-2	ABL1	x	1.05185	0.727891	1.08896	1.11566	0.865	1.14793	0.781038	0.565401	1.06313	0.716237	0.855872	1.04785	1.00514	0.966667	0.923628	1.22143	1.19437	1.23184	0.982143	1.88538	0.98366	0.787815	0.947955	0.837953	1.2799	0.897906	1.4937	0.868908	1.10687	1.07338	1.61165	0.851613	0.928803	0.710383	1.06325	0.879421	1.23355	1.58188	1.1749	2.24859	1.30024	1.01119	1.4209	1.046	0.709172
ABL1-3	ABL1	x	0.568421	0.993399	0.996466	1.13269	1.08065	1.27437	1.04348	1.0522	1.1224	1.13556	0.841463	0.862816	0.822742	1.05864	1.16399	1.08497	0.659864	1.03663	0.897611	0.77	1.14474	1.01055	1.01214	0.908602	1.06392	1.83882	0.775862	0.952652	1.06693	0.931507	1.04594	1.15833	1.03806	1.0904	1.77744	0.943205	1.17904	0.930502	1.3166	1.02845	0.921348	0.737523	1.78556	1.37079	0.84658
ABL1-4	ABL1	x	0.690141	0.829493	1.23656	1.10628	1.01554	0.863415	1.12016	0.980392	0.576826	1.26718	1.42715	0.834835	1.11789	0.892683	1.13913	1.32597	0.878788	0.786047	1.22876	0.994012	1.41781	0.950207	1.31967	0.876923	2.09756	1.12454	0.987952	1.3634	1.47989	0.880299	2.09581	0.918782	0.47449	1.04669	0.84273	0.900958	1.22642	1.39773	0.904762	1.39768	1.23711	1.67153	2.04247	1.68041	2.32482
ABL1-5	ABL1	x	1.03019	1.15898	0.720268	1.00519	0.97099	1.17593	1.03314	0.805875	0.781337	1.07597	1.06789	0.932515	0.96319	0.992378	1.14722	0.950495	1.06982	0.703704	1.21261	1.41535	1.30939	1.07726	0.940217	1.05502	0.639759	0.907692	0.696801	1.00526	1.04937	0.978311	1.6369	0.889845	0.53271	1.01529	0.919487	1.22047	1.1804	1.1185	1.05061	1.09492	0.893443	1.02378	1.03877	1.00956	1.01849
ABL1-6	ABL1	x	1.09202	0.926641	1.30101	1.22131	1.04474	1.00431	0.932735	0.861111	0.963434	1.16811	0.793388	1.04136	1.32392	1.30891	1.10142	1.24619	1.02326	1.16883	1.26901	1.04378	1.06388	0.962046	0.793215	1.13485	0.587217	0.954955	1.24702	0.910448	1.2048	1.09881	1.08696	1.80266	1.5943	0.943448	1.31835	1.24252	0.929204	1.17191	1.15625	0.982063	1.09724	0.834684	0.928251	1.20755	0.60778
ABL1-7	ABL1	x	1.07532	1.08458	0.975225	0.935252	1.03589	0.975877	0.672552	1.49436	0.789474	1.74826	1.00938	1.04738	1.24197	1.42576	1.01333	1.26222	1.30134	1.35904	1.00222	0.811905	1.06606	1.24808	1.09701	1.05735	1.09698	1.1161	0.828313	1.28237	1.43941	1.06702	1.55202	1.10526	0.866817	0.709677	0.925519	0.911839	0.995261	1.10133	1.05213	2.43574	1.02683	0.940625	2.21084	1.39535	1.4375
ABL1-8	ABL1	x	0.906977	1.08527	1.7619	0.955882	0.710843	1.63462	1.8963	2.65741	1.20455	0.704348	1.0084	1.02825	0.974843	1.3937	1.8125	1.03478	0.833333	0.869565	1.17241	1.42857	1.86598	0.947368	0.982759	0.575916	2.07258	1.29861	0.677966	0.888889	1.53741	1.21714	1	1.2963	3.6	0.866242	1.44828	0.886598	1.30693	1.7561	1.32941	1.84091	2.35484	1.63077	1.22159	2.08871	1.86923
ABL1-9	ABL1	x	0.884211	0.752809	0.622222	0.862069	0.705882	0.96	0.385475	0.413043	0.330827	0.54902	1.00602	0.988166	0.57037	0.806452	0.453782	0.758242	0.58871	0.5	0.824324	0.683168	0.627907	0.527132	0.506173	1.24348	0.693252	0.338983	4.1625	0.732143	1.075	0.541176	2.01042	0.642857	0.625	0.72327	1.15	1.80412	1.30435	0.72619	0.805195	3.39806	2.03125	1.02532	2.76699	1.20833	0.588608
ABL2-1	ABL2	x	0.85623	0.905263	0.651376	0.787004	0.784247	0.962963	0.691667	0.834337	1.33043	1.05249	1.2536	0.757576	1.48673	0.788845	0.948	0.957447	1.10277	0.409231	0.97166	1.22581	0.677551	0.706587	0.49359	0.707483	0.402626	0.186352	0.344743	1.10714	1.08457	1.16079	0.638484	1.01911	1.15854	0.818182	0.97651	1.10061	1.09292	1.13223	0.727969	0.929471	1.26055	1.57895	0.710327	1.46402	1.73065
ABL2-10	ABL2	x	1.63024	1.36042	1.02632	0.952297	1.17808	1.05872	1.37954	1.23201	1.24666	1.29492	1.02258	0.951422	1.09983	1.07256	0.950658	1.33658	1.65096	1.03723	1.31818	1.30037	1.09524	1.13731	1.22351	0.95216	0.541622	0.706977	0.900744	1.03282	0.815926	1.08351	1.27788	1.10018	1.24215	1.09501	0.877315	1.13784	1.07525	1	1.30861	1.05175	0.982667	0.916223	1.32342	1.08133	0.853723
ABL2-11	ABL2	x	0.724891	0.594966	0.860262	0.859335	0.975275	0.948403	0.568438	0.603252	0.97992	0.626573	0.900369	0.879182	0.983683	0.927318	0.772182	0.856851	0.569444	0.987952	0.746356	0.945205	0.802013	0.644796	0.531453	0.746392	0.506192	0.419476	0.430233	1.0997	1.08747	0.995733	0.843424	1.40918	1.99148	0.831904	0.473684	0.82582	0.755435	0.684211	0.639687	0.899083	0.712891	1.15735	1.25872	0.660156	1.05797
ABL2-12	ABL2	x	0.604911	0.865934	1.28472	0.919689	0.99093	0.91863	0.931034	0.741294	0.922056	1.00855	1.02941	0.881647	0.613187	0.948478	0.945794	1.08031	0.901124	1.02691	1.15759	0.84399	0.615385	0.798077	0.803371	0.905204	1.23488	0.971056	0.578297	0.903125	1.21536	1.17509	1.4098	2.04511	1.1087	0.956897	1.24785	0.994565	1.33636	0.960227	1.08995	0.913793	1.25295	1.08268	0.894828	0.986509	0.985959
ABL2-13	ABL2	x	0.982857	0.863128	0.981928	1.07692	1.08625	1.01893	1.97759	1.35255	1.1214	0.904468	1.27063	1.43421	1.34483	0.540476	0.93314	1.29568	0.98895	1.32456	0.831325	1	1.22924	0.952632	0.719917	0.770961	1.01682	1.49307	1.38677	0.971645	1.00741	1.38361	1.33939	0.544118	0.723958	1.32345	1.11321	1.01871	1.45819	1.35913	1.07353	1.19896	0.713725	0.743523	1.09516	0.64902	0.935233
ABL2-14	ABL2	x	1.024	1.22204	1.43441	1.14014	1.08199	0.924092	0.898013	1.00485	0.918845	1.00099	1.03865	1.05986	0.763077	1.20387	0.981413	1.00345	1.25741	1.52632	0.981419	1.02876	1.54419	0.96114	1.28685	1.21154	0.86431	1.14304	1.42671	0.99447	1.12872	0.887029	1.15589	1.04437	0.903633	1.12952	1.28571	1.18694	1.06424	0.95614	0.915751	1.12411	0.911661	0.715528	1.12172	0.961131	0.93913
ABL2-15	ABL2	x	0.681159	0.821678	1.21245	0.848797	0.98	0.757576	0.494792	0.773087	0.69802	0.681234	0.960089	0.784091	0.653731	0.638356	0.419795	0.823944	0.827465	0.918239	0.862876	0.535604	0.416928	0.418182	0.538106	0.595982	0.732997	0.552408	0.563607	1.21854	0.619835	1.14523	0.83045	0.832753	1.0855	0.876596	0.870968	0.729847	0.730769	0.457746	0.632353	0.378173	0.654506	0.587196	0.558376	0.495708	0.726269
ABL2-16	ABL2	x	0.634951	0.915816	1.43673	0.973978	0.890851	0.890411	0.677831	1.07067	1.03385	0.997625	0.796923	0.812102	0.866557	1.09028	0.882897	0.937864	0.863445	1.06857	1.1565	0.89225	1.20724	0.732044	0.774278	0.957333	0.96875	0.579008	0.576555	1.1817	0.862587	0.989474	1.24544	0.536489	0.562925	0.969199	1.1267	1.05189	1.04176	1.26292	0.857143	1.20833	1.01335	1.08763	1.33333	1.19436	1.3677
ABL2-17	ABL2	x	0.56705	0.795082	1.69036	0.829457	0.744898	0.781481	1.20202	1.02141	1.46215	0.56351	0.839695	0.710611	0.557756	0.674074	0.771523	0.995327	0.567766	1.16279	0.668	0.970443	0.80315	0.468144	0.892361	0.797508	1.30827	0.525597	0.946502	1.02529	0.702703	0.710602	1.39394	0.763547	1.22816	0.741071	0.836317	1.09167	0.843137	0.752632	0.910828	1.21515	0.661808	1.19403	1.15758	0.344023	0.75
ABL2-18	ABL2	x	1.01952	1.04992	1.30277	0.896125	0.811959	0.89811	0.82893	0.933862	1.01594	0.815623	0.95389	0.946866	0.771277	0.749452	0.845462	1.08053	1.00613	1.00971	0.919223	0.771901	0.80373	0.825517	0.78041	0.771446	1.49724	1.69821	1.31401	1.27616	1.03766	1.06392	0.940191	1.69896	1.06919	1.00177	0.895582	0.860927	1.00369	1.01024	0.879208	0.933864	0.798817	1.11579	1.21066	1.2551	1.68553
ABL2-19	ABL2	x	1.25575	1.84122	1.02469	0.952381	1.09804	0.946154	0.802993	0.683047	1.11304	1.37807	0.702163	1.06581	0.933544	0.508997	0.703407	1.16892	0.922078	1.19394	0.819549	0.92973	1.21711	0.680154	1.17857	1.16253	1.13679	1.04202	0.690114	0.836466	1.20748	1.24954	0.99308	0.517333	1.36036	0.778135	1.00318	0.993243	1.16566	1.1377	1.64015	0.82218	0.788636	1.28649	1.20268	0.652273	1.82432
ABL2-2	ABL2	x	1.54792	1.22967	0.978654	1.0742	1.10491	0.928105	1.13977	1.21858	1.2789	1.43127	1.20886	0.97543	0.771242	1.13674	0.638211	0.917526	1.24144	1.08904	1.19338	0.98725	0.76886	1.00491	0.838832	1.01105	0.974194	0.752454	1.29161	1.18201	1.0596	1.26915	1.07547	1.0786	1.66604	0.982122	0.968085	0.892327	1.23374	1.21776	1.24667	0.891429	1.02975	0.755464	1.05714	1.09773	0.853825
ABL2-3	ABL2	x	0.852459	1.18182	1.23504	0.946714	1.15108	1.08571	1.28405	0.67423	0.91771	1.1626	1.14979	1.07484	0.927984	0.69218	0.797037	1.15888	0.934466	1.31818	0.719697	1.00754	1.31963	1	0.853041	0.895683	0.662356	0.599767	0.837925	1.06091	1.1691	0.9601	1.08911	0.71466	1.86819	0.868102	0.99084	0.82434	0.977077	1.25683	1.02632	0.805808	1.7008	0.759701	0.872958	1.4739	0.716418
ABL2-4	ABL2	x	0.880266	1.01471	0.548673	0.886918	0.985106	1.01405	1.26991	0.805423	0.906942	0.757463	0.788668	0.812995	0.602339	1.41646	1.17011	0.90099	0.824895	0.820037	1.25978	0.969231	1.35154	0.863462	0.873303	0.88582	1.36653	0.888244	0.970772	1.37366	1.23214	1.05569	1.27533	1.07018	1.01051	1.07905	1.32509	1.17903	0.823245	0.99784	0.915332	1.11738	1.29098	1.34215	1.3811	1.46409	1.09487
ABL2-5	ABL2	x	1.14089	0.936434	0.963333	0.98	0.910256	0.974684	1.32436	0.993213	1.13043	1.03758	1.12845	0.704439	0.716698	0.704174	0.839928	0.812808	0.960345	0.963668	0.681909	0.742451	0.843564	1.08041	0.953632	1.10543	1.1045	0.833087	0.649412	1.01981	0.972672	1.03846	0.955626	0.907576	1.28399	0.971903	1.22025	0.917744	0.705224	0.636727	0.858456	1.21811	1.40867	0.880851	1.8852	1.36005	0.832979
ABL2-6	ABL2	x	0.814286	0.832061	0.804054	0.985294	0.610778	0.910448	0.732484	1.04688	0.880952	0.931193	0.875	1.22596	0.676829	0.733333	1.48598	0.328947	1.03846	0.623377	1.32743	0.955882	0.759036	1.10145	1.56051	1.1295	2.58427	0.575092	0.795349	1.14721	1.20851	0.838428	2.33333	3.37209	0.406977	0.859551	0.988806	0.814346	0.930693	0.956522	1.23958	1.1697	0.7713	1.43617	1.69697	0.233184	2.17021
ABL2-7	ABL2	x	0.643478	1.06897	1.71795	1.07609	1.15452	0.929919	0.588652	1.10283	0.846535	0.853846	0.682645	1.09552	1.11409	0.633554	0.726457	1.24164	0.976331	1.02041	0.873926	1.35691	0.994048	0.933884	0.746964	0.955078	0.610829	0.971722	0.485106	0.942446	0.753982	0.778218	0.769231	1.74368	0.584337	1.15152	0.623498	1.02004	0.832776	0.951311	0.986063	1.41063	0.812821	0.912409	1.27536	0.974359	0.622871
ABL2-8	ABL2	x	1.20063	0.796392	0.775385	0.951743	0.945545	0.964103	0.894837	0.828516	0.663516	0.917448	0.870229	0.762938	0.722646	0.644186	0.841889	1.60727	0.880682	1.23851	0.889391	1.25424	1.3965	0.742925	0.89916	0.976939	1.23404	0.615652	1.03365	0.867572	1.42977	1.33514	0.906452	0.266862	0.874644	1.01504	1.17518	1.09901	0.944118	0.974286	1.10204	0.36518	0.929961	0.65991	0.571125	0.77821	0.912162
ABL2-9	ABL2	x	0.942308	0.686099	0.373444	0.693878	0.924324	0.641026	0.851675	0.675373	0.890728	0.851632	0.738889	0.561308	0.518519	0.892308	0.615741	0.675926	0.551111	0.696078	0.602888	0.875622	0.868687	0.477509	1.19048	0.503906	0.919355	0.122905	1.36614	1.33708	1.10882	0.676617	1.18692	1.51572	0.652968	0.78125	0.752508	1	0.661458	0.785311	0.868571	0.839216	0.724696	0.595652	1.18824	0.603239	0.7
ACVR1-1	ACVR1	x	1.00535	1.35294	1.38922	1.08042	1.00301	1.08276	1.23866	0.799136	1.0486	0.888646	0.762475	1.23326	0.701754	0.921348	0.959016	1.24233	1.12332	1.02394	0.700348	0.706383	0.61516	0.697201	0.919512	1.10724	0.680804	0.523346	1.07038	0.9783	1.34888	1.14378	1.01266	1.51471	0.649425	1.02731	0.804671	1.18282	0.861027	0.749235	1.04225	1.08303	0.854545	0.624754	0.754613	0.797727	0.404715
ACVR1-10	ACVR1	x	1.24395	0.570698	1.02893	1.13962	0.896657	1.14917	1.06553	1.30734	1.2209	1.09508	0.908558	0.764897	0.958519	1.03008	0.643087	0.884941	0.858757	1.16284	0.880597	0.853707	0.958095	0.978082	0.998601	0.885542	0.89816	1.07833	0.825279	0.954683	0.886387	1.02804	0.76	0.673504	1.0053	0.912331	1.08589	0.873934	1.22616	0.86166	0.939326	1.28289	0.756184	0.541353	1.13861	0.733804	0.56391
ACVR1-11	ACVR1	x	0.597561	1.08333	1.4763	1.02445	1.12269	1.12105	0.905588	0.903002	0.952191	1.12121	1.21865	0.903315	1.15991	0.977578	1.16408	1.32581	0.821002	1.18733	0.92011	0.861042	0.672018	0.976331	1.07155	1.27392	0.584337	1.29423	0.88227	1.2486	0.96845	0.956028	1.39791	0.767554	1.09716	0.741486	1.09979	1.01366	1.02204	1.27877	1.30994	1.01289	0.719397	0.783133	1.17495	0.836158	1.01807
ACVR1-12	ACVR1	x	0.708674	0.747856	0.985428	0.877049	1.25723	0.980568	1.11641	1.03421	1.10796	0.77907	0.943508	0.982553	1.01625	0.709884	1.01442	0.607639	1.23674	1.08333	0.751138	0.914783	1.35907	0.870478	0.967254	1.02822	1.09472	0.821223	0.856174	0.964427	0.923657	0.975	0.604688	0.902564	1.425	0.813811	0.958333	1.09833	0.985019	0.907919	0.856343	0.522307	0.950549	0.914361	0.557127	0.667582	0.910408
ACVR1-13	ACVR1	x	0.994949	0.799587	0.608989	0.876744	0.854348	1.08	0.921456	1.02652	1.41988	0.839833	0.969432	1.03065	0.880851	0.690802	1.14323	0.844498	0.81137	1.04918	0.507937	0.654135	0.582857	0.691318	0.827523	1.24779	0.480609	0.770083	0.33277	0.834473	0.899291	0.888743	0.73913	0.823529	1.3014	1.03369	1.08438	0.96189	1.09863	0.98301	1.13649	0.520875	0.647163	0.318681	0.55666	0.528369	0.265934
ACVR1-14	ACVR1	x	1.07516	1.36919	1.1312	1.1274	1.10866	1.14286	1.4975	1.621	1.40572	1.19056	1.37473	1.35419	1.44156	1.34099	1.3723	1.10478	1.1184	1.44937	1.48802	1.63531	1.45304	1.45356	1.34987	1.35444	1.67337	1.10445	1.50258	1.0568	0.99393	1.17623	1.11369	1.32991	1.27202	1.01158	1.21087	1.31864	1.43264	1.38884	1.40505	1.29531	0.922092	1.30402	1.18301	1.07123	1.413
ACVR1-2	ACVR1	x	1.14172	1.28918	1.04299	1.16116	1.08448	1.08642	1.18291	1.35856	1.32019	1.21186	1.11592	1.18204	1.3908	1.1943	1.01703	0.854806	0.952607	0.666667	1.05082	1.42245	1.49219	1.04046	1.11014	1.17723	1.39832	1.03307	0.782979	0.877129	1.31837	0.960445	0.906593	2.32703	1.57922	1.14083	1.03348	1.10533	1.3357	1.2716	1.08355	1.11526	1.24126	0.698873	1.17134	1.64161	0.597424
ACVR1-3	ACVR1	x	0.762332	1.00189	1.46803	1.28645	1.1338	0.984127	1.35833	1.23364	0.938193	0.965465	1.11111	1.04072	0.856661	1.27273	1.47215	1.13319	0.963145	0.982792	1.33252	1.18886	1.58006	1.27289	1.10727	1.17013	0.914557	0.894345	0.770627	1.2013	1.27867	1.27186	1.01523	0.989529	1.28682	1.36396	1.24886	0.902349	0.962687	1.05627	1.14171	1.2693	1.12674	1.26212	1.25047	1.12153	0.892424
ACVR1-4	ACVR1	x	0.818612	1.06056	0.992038	0.931973	1.11382	0.998236	1.29585	1.35754	1.31686	1.10296	1.09974	0.937841	1.00362	1.27072	1.12179	1.06595	0.89313	1.07961	0.697324	0.765957	0.73271	1.09469	1.09841	1.0518	1.02662	2.31387	1.31466	1.17189	1.03067	0.98913	0.574766	1.27273	0.721362	0.768799	1.54593	0.850716	1.09125	1.26969	1.2071	0.546495	0.760429	0.902589	0.433476	0.800954	1.11097
ACVR1-5	ACVR1	x	0.856613	0.730408	0.779716	0.991795	1.12796	0.993111	1.38634	1.36775	1.30825	0.852011	0.851137	1.356	0.969298	1.03953	1.13886	0.683429	1.08776	1.01904	0.685786	0.918149	0.894417	0.953807	0.879605	0.923077	0.728507	0.916743	1.17793	1.13687	1.02747	0.992081	0.883721	1.05759	1.30704	0.963042	1.49255	1.18325	1.03789	0.933498	1.1481	0.791406	0.819158	0.773779	1.05192	0.745665	0.787489
ACVR1-6	ACVR1	x	0.479532	0.8223	0.604863	0.851064	0.916898	0.962406	0.749425	1.11084	0.827586	0.849558	0.835249	0.745794	1.15881	0.818898	0.926027	0.604863	0.525952	0.447581	0.905914	0.548872	0.475524	1.11136	0.787276	0.612335	0.471338	1.1335	0.404568	0.695035	0.93186	0.847328	0.713333	0.666667	1.00369	1.21964	0.911814	0.93662	1.24125	1.12857	0.895161	0.257028	0.438144	0.6175	0.162651	0.154639	0.5125
ACVR1-7	ACVR1	x	0.824176	0.762324	1.01639	0.919231	0.927875	1.07345	1.32709	1.11234	0.949591	1.0012	0.875706	0.949721	1.23836	1.06681	0.718141	0.820809	0.942164	1.28112	0.785548	0.78781	0.751908	1.00301	1.02827	1.19225	0.788366	0.739355	1.17349	1.06839	0.970081	1.07534	1.1701	0.656667	0.853659	1.03064	0.761805	0.994438	0.967146	0.991886	0.801636	1.0291	0.630376	0.893064	1.09035	0.642473	0.919075
ACVR1-8	ACVR1	x	0.930292	0.924617	0.771429	1.09281	0.961732	1.09343	1.10341	0.846591	1.23273	0.861386	0.995084	1.03511	0.865828	1.02653	0.856338	0.79027	0.759524	0.862903	0.717258	0.634118	0.641444	0.915799	1.0046	1.02727	1.1968	0.9375	1.02593	1.17305	0.953625	0.986996	0.822093	0.738594	0.722488	1.1249	0.832258	0.90991	1.37599	1.01633	1.21326	0.590123	0.614004	1.06424	0.599177	0.579892	0.756076
ACVR1-9	ACVR1	x	0.862566	0.778768	0.638313	1.07351	1.07608	1.04208	0.933721	1.06651	0.955673	0.957229	0.956136	0.953639	0.876312	1.06619	0.961082	1.04936	0.936842	0.868629	0.945946	1.17811	1.08197	1.10578	1.01781	0.987321	1.08974	1.41768	0.98911	1.18744	1.14863	1.04674	0.835115	0.787575	0.864966	1.23064	1.30361	1.04512	1.04153	1.09258	0.869601	0.638144	0.625066	0.638183	0.574742	0.512427	0.728502
ACVR1B-1	ACVR1B	x	0.907477	1.19631	0.889847	0.985417	0.848089	0.983158	0.980212	1.13761	1.05041	0.973757	1.06691	1.11957	1.15005	0.944963	0.960784	1.10938	0.971254	1.15978	0.967213	1.17143	1.06901	0.768438	0.856331	1.13886	0.930481	1.4003	0.833089	0.85291	0.737989	0.930677	1.18287	0.871816	0.715929	0.777515	1.03037	0.96284	0.995803	1.30109	1.21711	0.865177	0.700065	0.633528	0.860851	0.787164	0.88434
ACVR1B-10	ACVR1B	x	1.07927	0.997833	0.596401	0.741083	0.720105	0.751404	1	0.640572	0.617967	1.05076	0.871551	0.858772	0.607521	0.735912	0.739927	0.970549	0.695971	0.921717	0.713608	0.458791	0.502304	0.55489	0.481562	0.614471	0.746466	0.841509	0.819491	0.990218	0.770787	0.905415	1.33779	0.777101	1.27039	0.746759	0.545942	0.885482	0.695302	0.90365	0.816489	1.12059	0.932372	1.33731	0.880334	0.979261	1.46563
ACVR1B-11	ACVR1B	x	0.777473	1.14597	0.708835	0.873096	0.98645	0.88835	1.16696	0.629325	0.741824	0.814394	0.865385	0.71644	0.702439	0.843373	0.910042	1.15385	1.32548	0.99591	0.897098	0.84472	0.626147	1.02342	0.901923	1.02778	0.576203	0.837398	0.613828	1.03729	1.00502	1.20253	1.0307	1.56476	1.17241	0.919505	0.996644	1.04575	0.897494	0.887255	0.751163	1.00145	1.22906	1.31049	0.768895	1.27692	1.14685
ACVR1B-12	ACVR1B	x	0.835351	0.85	1.4434	1.24879	1.12121	1.305	0.800317	1.46394	0.66878	0.76244	0.877612	1.23561	1.31124	1.52154	0.96374	0.758095	0.955128	0.825666	0.759524	0.668192	1.11821	0.923228	1.26063	1.13333	0.786408	0.912317	0.918534	0.88589	1.17795	0.823925	0.953532	0.983806	0.559041	1.08131	0.994526	0.702641	0.905747	0.772727	0.715686	0.665685	1.26715	1.19135	0.536082	0.967509	1.24459
ACVR1B-13	ACVR1B	x	1.09394	1.18879	1.34342	0.929739	1.14807	0.931227	1.14798	1.49707	0.975342	0.977346	0.986715	1.11497	1.59806	1.15425	1.18231	1.0802	0.947858	1.37475	1.53883	1.17	1.32403	1.17507	1.34993	1.4374	1.7696	0.844523	1.5	0.868836	1.03568	1.03503	1.9415	2	1.34965	1.37416	0.98066	1.16401	1.29304	1.31056	1.09534	1.74096	1.18907	1.41064	1.65123	1.5229	1.29877
ACVR1B-2	ACVR1B	x	1.14617	0.981405	1.24173	1.05837	1.01991	0.947005	1.52622	1.15052	1.32399	1.1567	1.0381	1.30394	1.19923	1.19238	1.46092	1.11294	1.20888	1.30303	1.1138	1.2451	1.61675	1.48944	1.14237	1.16034	0.785425	1.17424	0.939739	0.916272	1.32253	1.05499	1.21429	1.21374	0.852349	1.22999	0.897742	1.0258	0.875622	1.03141	0.832	2.0807	1.11786	1.05451	2.04561	0.928571	1.05451
ACVR1B-3	ACVR1B	x	1.06066	1.21182	1.43739	1.23723	1.19913	1.13467	1.26239	1.38432	1.09401	1.13048	1.34527	1.06773	0.892734	1.41633	0.966851	1.13428	1.09322	1.55066	1.18654	1.08732	1.1197	1.27901	1.29543	1.14302	1.47897	1.20571	1.69837	1.17382	1.19777	0.906089	1.28421	1.50513	1.01505	1.21721	1.0581	1.02075	0.97076	1.051	1.20412	0.832947	1.10475	1.0809	0.786543	1.1486	1.01061
ACVR1B-4	ACVR1B	x	0.723881	0.775591	0.890625	1.15836	0.866667	0.899054	1	0.861953	0.824561	0.589649	0.59633	0.906459	0.835526	0.972973	0.916667	1.29286	0.654762	0.832031	0.713781	0.629344	0.625874	0.900763	0.5962	0.624665	1.11778	0.59116	0.60804	0.839286	0.798337	0.780488	0.301038	2.35563	0.855615	0.90566	0.771529	0.738683	0.721739	0.45977	0.577273	0.843501	1.33842	0.874627	1.35013	2.61069	0.638806
ACVR1B-5	ACVR1B	x	1.50505	1.24691	1.66447	0.968421	1.08466	0.917051	1.03448	0.970588	1.252	1.66972	1.18387	0.95389	1.59777	0.990566	1.46154	1.81871	1.1036	0.995098	1.2037	1.80469	1.20091	1.31343	1.65385	1.56225	1.38577	3.10363	2.0339	0.924419	1.21324	1.36559	0.52	2.89941	1.13068	1.09966	1.35111	1.6309	1.38298	0.853147	0.977654	0.825758	0.821862	1.18779	0.75	1.62348	1.58216
ACVR1B-6	ACVR1B	x	0.916067	0.992462	0.849231	1.19663	1.13814	1.17448	0.785992	1.32042	1.54832	0.965574	0.774336	0.955932	1.17824	1.21581	1.38421	1.81886	1.16575	0.99729	1.35496	1.18612	0.987745	1.45327	1.1285	1.10943	0.838863	0.604247	0.545055	1.21562	1.11927	1.32353	0.468293	0.979123	1.85714	0.772093	0.996248	1.0495	0.94302	0.820652	1.07339	0.994413	1.10651	1.73109	1.15642	1.39053	1.92857
ACVR1B-7	ACVR1B	x	1.19288	1.6701	1.0805	0.852113	0.709677	1.15299	0.782407	1.26444	1.36119	0.742394	0.442308	0.96861	1.03846	0.656566	0.96	0.926045	0.905363	1.53261	1.14672	1.44608	0.683794	0.884615	0.895954	0.905775	0.960227	1.05505	1.33566	0.787826	1.02191	0.793651	1.28889	0.734536	1.2	0.739035	0.889655	0.773973	1.04575	0.674051	0.610932	0.91344	0.785354	0.615385	1.18451	0.755051	0.367246
ACVR1B-8	ACVR1B	x	1.22707	0.606426	1.23581	0.903421	0.876457	0.850622	0.889105	1.42322	0.697232	0.762264	1.12681	1.19367	1.61934	0.904545	0.847458	1.22172	1.19495	0.962389	0.808656	0.987147	0.584867	0.797422	0.83087	0.890869	0.440767	0.896082	0.841667	1.00127	0.95817	0.746348	1.55314	0.948661	0.967054	0.781818	0.722149	0.83414	0.792711	0.739255	0.904282	0.956376	1.22407	0.706625	0.951342	0.542593	0.782334
ACVR1B-9	ACVR1B	x	1.60773	0.916883	1.60909	1.1311	1.14697	1.07163	1.04491	1.47215	1.56394	1.07776	1.20462	0.940476	0.974227	1.09976	1.39365	1.46061	1.06452	1.24685	1.06507	1.17251	1.51447	1.40519	1.33966	1.17467	1.05068	1.17692	1.44917	0.990726	1.44519	1.25475	2.1021	1.27479	1.90751	1.24872	0.932886	1.05169	1.21543	1.37898	1.16225	1.17408	1.04097	0.924214	1.10251	0.540037	1.03327
ACVR1C-1	ACVR1C	x	0.82	0.82439	1.06122	1.16279	1.00452	1.0098	1.8607	1.04	1.44796	0.992063	0.990964	1.02583	0.784314	1.35789	1.22798	1.2924	1.27381	1.54412	1.35829	1.10526	1.38728	1.28444	0.83871	1.08846	0.721578	0.486957	0.608163	0.864615	0.875723	1.27925	1.81707	0.214286	1.15068	1.16955	1.15882	1.50459	0.581395	0.97351	1.47297	0.430189	0.817518	0.760956	0.596226	1.09124	0.808765
ACVR1C-10	ACVR1C	x	1.24719	0.476852	0.995098	1.37342	1.03165	0.786408	0.565056	1.11017	0.808824	1.53125	0.809028	1.21344	0.402402	1.23316	1.16667	1.55208	0.922727	0.930108	1.03756	1.1716	1.5045	1.21196	1.34259	1.41395	0.962441	1.13364	1.3609	0.771318	1.35922	1.02685	2.89674	1.71574	0.766169	0.729167	0.967078	0.776173	1.18857	0.880503	1.49375	0.74717	1.25877	1.72414	1.23774	0.745614	0.775862
ACVR1C-11	ACVR1C	x	1.0801	1.06225	1.31051	1.03063	0.934307	1.02458	0.832864	0.847851	1.12627	1.13623	1.26171	1.18732	1.2289	0.772853	0.970793	1.0617	0.860987	1.18907	0.982818	0.952542	1.17108	1.00337	0.83391	1.12332	0.646776	1.1243	0.635081	0.984578	1.20311	1.16747	0.772059	1.08552	0.988688	1.0084	1.04918	0.936152	1.15871	1.00756	1.0414	1.32671	0.70936	1.05777	0.953642	0.633498	0.785714
ACVR1C-12	ACVR1C	x	0.811321	1.10484	0.104762	1.2809	0.971963	0.941667	0.541667	0.570248	1.15957	1.10236	0.805882	1.03311	1.28986	1.27536	0.639241	0.590909	0.921569	1.42466	0.985507	0.974026	0.68595	1.40336	0.952055	0.733333	0.756098	0.561905	0.392857	0.978723	0.890805	0.483696	0.926471	1.10989	1.46914	1.53846	1.22667	1.35659	1.94667	1.10667	1.51899	0.613333	0.326087	0.454545	1.22667	0.521739	0.321678
ACVR1C-13	ACVR1C	x	0.95171	1.26769	1.13808	0.888889	0.806005	0.855603	0.807692	0.493464	0.808429	0.597701	0.785321	0.817891	0.702479	0.976378	0.634434	0.990521	0.709251	0.646055	0.82623	0.71131	0.799443	1.2241	0.605893	0.799632	0.344444	0.75	0.670588	0.727007	0.740458	0.923836	1.39175	1.31081	1.45913	0.811111	0.849335	1.02075	0.954416	0.83871	1.44216	0.886477	0.660743	0.724196	1.0601	0.439418	0.680203
ACVR1C-14	ACVR1C	x	0.846614	1.55909	1.79565	1.17805	1.02068	1.0859	1.23489	1.05323	1.43124	1.25358	0.976109	1.4175	1.58275	1.13079	1.28571	1.45679	1.0974	1.58543	1.46045	1.26923	1.49895	1.21548	1.45024	1.86593	1.58209	1.67689	1.40662	1.375	0.967524	1.27083	1.10294	1.37673	1.23778	1.32201	1.025	1.79386	1.23002	1.29655	1.52092	1.5666	1.76501	0.949387	2.09944	2.09949	0.742331
ACVR1C-15	ACVR1C	x	0.903614	1.29362	0.885281	1.3049	1.06496	1.04815	1.08555	0.882562	1.11031	0.863431	1.04129	0.86052	0.77592	1.10568	1.24593	1.14076	0.859794	1.24138	1.38462	1.12877	1.55907	0.822558	0.763198	1.09265	1.05232	0.783848	1.05921	1.2839	0.982574	1.24387	1.29175	0.592516	0.728814	0.983908	1.32525	0.97389	1.23991	0.825581	1.42821	0.816781	0.660225	1.25795	0.601027	0.703704	0.696113
ACVR1C-16	ACVR1C	x	1.2926	1.59884	1.9356	1.0795	1.04017	1.07935	1.26299	1.18489	1.50984	1.08934	1.39932	1.19729	1.11202	1.36879	1.20101	1.14	1.38269	1.36892	1.2133	1.38529	1.25756	1.31547	1.50428	1.70157	1.83906	1.8978	1.36443	0.918007	1.20601	1.17234	1.73029	0.817643	1.27358	1.11982	1.32445	0.986409	1.27682	1.28043	1.71227	1.04092	1.2907	1.42407	1.64752	1.3792	1.56499
ACVR1C-17	ACVR1C	x	0.928328	0.914286	1.25235	1.00367	0.916667	1.11975	1.05009	1.25074	1.03436	0.997592	0.951478	0.970095	1.44684	1.04903	1.37257	0.795895	1.18632	0.987849	0.853933	0.9275	0.924503	0.973991	1.09559	1.04834	0.823259	1.13282	0.544562	1.07451	1.1099	1.09412	0.835731	1.15689	1.06878	1.10395	1.22431	1.03468	1.10114	1.16715	1.08345	0.986791	1.27807	1.12587	1.19114	0.917098	1.10664
ACVR1C-18	ACVR1C	x	0.785	1.215	0.804401	0.79597	0.916468	0.892944	0.768313	1.03241	1.09515	0.714882	0.991424	0.944238	0.856823	0.997812	0.944828	0.743869	1.10914	0.997537	1.05028	1.17941	1.11585	0.789474	1.07692	0.874477	0.505535	0.594958	1.02504	0.866667	0.644699	0.691395	1.24272	0.544747	1.10094	1.09034	0.92006	0.85221	0.974522	1.16129	1.2209	1.13319	0.773333	1.00188	1.21142	0.529524	1.01695
ACVR1C-19	ACVR1C	x	1.54584	0.913978	1.0292	1.23288	0.96679	0.876173	0.650212	1.77935	0.915584	1.24357	1.00266	1.27331	1.09444	1.00177	1.02976	1.22802	1.35917	0.77951	1.01789	1.40795	1.16559	1.20868	0.998374	0.939394	0.65099	0.75	1.06657	1.07407	0.925197	1.09044	0.699284	0.443956	1.03233	1.01585	1.41869	0.950565	1.08838	1.09756	0.819861	1.02453	0.859083	1.1873	0.733962	0.667233	0.873016
ACVR1C-2	ACVR1C	x	2.0424	1.56832	0.732997	0.843195	0.952239	0.806748	1.22043	0.704156	1.22055	1.11455	0.818487	0.82495	0.895141	1.29737	0.89486	1.12913	1.31613	1.31561	1.19772	1.18154	1.21569	1.09828	1.05034	1.09143	1.35404	0.76338	1.74267	1.10185	0.764818	0.874016	1.32187	0.740634	0.788927	0.805996	1.11674	0.835355	1.14341	1.06038	0.966165	0.841975	1.17914	0.781003	0.77284	1.71429	0.82058
ACVR1C-20	ACVR1C	x	0.618557	1.23005	1.64948	0.861432	0.963855	0.84949	0.686957	0.898204	0.658436	0.771475	0.908951	1.02874	0.841202	1.05394	1.18663	0.744949	0.589189	0.778351	1.22513	0.652174	0.937838	0.965974	0.754601	0.845638	0.590717	0.463816	0.759259	1.16258	0.847662	0.90566	1.57823	0.742515	1.91183	0.855501	0.925743	1.21197	1.08123	1.27358	0.768	0.690058	0.679443	0.55121	0.549708	0.620209	0.495345
ACVR1C-3	ACVR1C	x	1.26919	1.83333	1.36694	1.20844	1.17836	1.16706	1.21471	1.47759	1.35993	1.12819	1.38272	1.42266	1.10636	1.48238	1.34177	1.33907	1.44048	1.32391	1.47085	1.45983	1.65919	1.25945	1.38632	1.48525	1.64934	1.56713	1.23722	1.04762	1.01579	0.997892	1.26608	1.41614	1.0355	1.25066	1.13378	1.13633	1.33722	1.6146	1.61157	1.37636	1.63636	1.17607	1.55545	1.08504	1.3265
ACVR1C-4	ACVR1C	x	0.80663	1.42527	1.25762	1.02269	0.97856	0.962804	1.04995	1.33333	1.068	0.898949	0.831411	0.863081	0.852399	0.867001	1.05783	1.21785	1.38132	1.07267	1.02415	1.15456	1.12436	1.07246	1.06148	0.670127	1.14693	0.694915	0.742509	0.868149	0.8912	0.965347	1.35703	1.28138	1.28491	0.984375	1.00095	1.04085	1.18323	1.14734	1.07756	1.36897	1.29487	0.970273	1.44235	0.983235	0.957194
ACVR1C-5	ACVR1C	x	0.905797	0.396501	0.894161	0.973753	0.883077	0.836364	1.00693	0.928934	0.916667	0.986726	0.850554	1.30044	0.833766	0.852071	0.674419	1.42069	1.08614	1.26217	0.861953	0.657051	1.18828	1.14634	0.775943	0.815678	1.23547	0.857447	0.6743	1.10692	1.03162	0.935849	0.641638	1.87625	1.23952	1.42325	1.21325	0.954424	0.874214	1.08961	1.00778	1.15202	1.26178	0.833333	1.24703	1.79843	0.645503
ACVR1C-6	ACVR1C	x	1.50955	1.82569	1.02406	0.952507	1.17754	1.24468	1.11928	1.56766	0.871636	1.36147	0.898488	1.4537	1.04848	0.988839	0.969188	1.05325	1.16529	1.54438	1.48996	1.25862	1.75556	1.67224	1.22835	1.38012	2.10909	1.47774	0.720812	0.996324	1.25554	1.10912	1.09896	1.69974	0.583333	1.27379	1.3389	1.30275	1.05	0.817416	1	0.875717	0.812903	1.23353	0.885277	0.944086	1.26547
ACVR1C-7	ACVR1C	x	2.07778	0.927778	1.21675	0.869919	0.973214	0.938095	1.07752	1.41702	0.883582	1.07955	0.940133	1.48586	0.67382	1.21978	1.13433	0.892704	2.29208	1.29167	1.18868	0.984043	1.05185	1.12996	1.32609	1.30584	0.994413	1.92963	1.43644	0.92973	0.99322	0.88255	0.935622	1.14976	1.45161	1.42456	1.33505	1.00288	1.17857	1.6375	1.18493	1.50752	1.58278	1.52804	1.42105	3.62583	1.75234
ACVR1C-8	ACVR1C	x	0.986755	0.610209	0.478936	0.963048	0.897959	0.851675	0.844857	0.939806	0.748047	0.762148	0.845833	0.761689	0.903226	0.789474	0.807302	0.613537	0.827506	0.733503	0.778313	0.963277	0.972527	0.889546	0.689003	0.722826	0.316614	0.728013	0.525194	0.869263	1.18601	0.676512	1.63566	1.70361	1.11062	0.904692	0.770149	0.875519	0.81571	0.849282	0.853659	1.3286	1.08037	0.996558	1.51865	1.18318	1.49225
ACVR1C-9	ACVR1C	x	0.983409	1.7086	1.23459	1.48233	1.31445	1.08397	1.10667	1.05166	1.35205	1.52255	1.43174	1.50428	1.13621	1.35225	1.21303	1.1406	1.43633	1.33611	1.33466	1.3894	1.65534	1.48856	1.14484	1.55243	2.05731	1.21332	1.65533	1.14879	1.4858	1.23202	1.17712	1.18697	2.16374	1.30038	1.25774	1.27018	1.416	1.59962	1.8643	1.54777	1.81212	1.5788	1.29427	2.71152	1.27937
ACVR2A-1	ACVR2A	x	1.41489	1.15603	0.874747	1.06822	1.15882	1.03802	1.01689	1.42807	1.24023	1.11435	1.21832	1.01937	1.17199	0.893443	1.35863	1.12548	1.45756	0.848649	1.17842	1.59221	1.06304	1.1221	1.13722	1.34076	0.803378	1.11667	1.45918	1.21	1.0794	1.19583	1.70498	0.741071	0.833061	1.21993	1.1631	1.05052	1.16103	1.21976	1.18143	0.791304	0.914557	0.912325	1.15404	0.884494	0.888183
ACVR2A-10	ACVR2A	x	1.45234	1.04704	1.8045	1.05429	1.0256	0.991948	1.5677	1.20918	1.14794	1.37101	1.21753	1.15271	1.0365	1.21765	1.23726	1.23508	1.14533	0.917241	1.05892	1.23917	1.39338	1.20852	1.22811	1.2285	1.24786	0.892052	1.48328	1.1051	1.1927	0.992958	0.795717	0.767824	1.06825	1.4189	1.30346	1.22649	1.29074	1.3412	1.51471	1.21079	1.32579	0.765695	1.43162	1.00629	0.807175
ACVR2A-11	ACVR2A	x	0.649682	1.18144	1.04656	1.07539	0.886525	1.08434	0.889695	1.67492	1.21789	1.19027	0.692754	0.879167	0.947991	0.984405	0.961165	0.845666	1.15745	1.0678	1.15761	1.09169	1.10364	1.11567	0.89749	1.32296	1.01005	1.119	0.908419	1.04011	1.08141	0.885305	0.917553	0.522892	0.855372	1.18025	1.09434	1.10306	1.15217	1.10156	0.852679	0.611765	0.878049	0.680067	0.894118	1.05894	0.788945
ACVR2A-12	ACVR2A	x	1.55442	1.21528	1.4733	0.616438	1.0815	1.07299	1.69324	1.43375	1.47287	1.12898	0.961776	0.83891	0.764486	0.904844	0.858195	1.15328	1.47339	1.32083	0.971861	0.75395	0.711382	1.2404	0.687861	0.902549	0.95754	2.00146	1.56667	0.825647	0.781478	0.839304	1.1523	0.89934	0.819646	0.981208	0.913043	0.800808	0.99375	1.21488	0.98374	0.852094	0.46837	0.767411	0.943717	0.327251	0.862024
ACVR2A-13	ACVR2A	x	1.13907	1	0.95	0.9202	1.01026	1.55814	1.21721	0.533333	1.65778	1.09576	1.26678	1.21812	1.95636	1.54247	1.14023	1.14627	1.63455	1.60248	1.13384	1.17079	1.50871	0.897087	1.22555	1.3	1.05082	1.45994	1.25678	1.05437	0.776224	2.04147	0.377005	0.748571	0.821656	1.08814	0.759943	0.987805	1.21978	1.49677	0.95679	1.03333	0.809524	0.771739	1.79487	0.766234	0.902174
ACVR2A-2	ACVR2A	x	1.05693	0.997934	1.45399	1.01126	0.778491	0.853097	1.25493	1.85932	1.29503	1.08313	1.12096	0.974619	0.745865	0.811594	0.754074	0.770355	0.716356	1.03529	0.647059	0.764912	0.929577	1.05923	0.931944	0.987374	0.865506	1.20892	0.547486	1.05526	0.946154	1.12515	0.984914	0.905325	0.971239	0.921019	0.73822	0.986684	0.907363	0.868932	0.846154	1.16159	0.464646	0.675084	1.14634	0.626263	0.631313
ACVR2A-3	ACVR2A	x	0.832285	0.904988	0.831858	1.16524	1.1466	1.16291	1.54545	1.11582	0.975379	1.05672	0.891334	0.975831	1.21978	1.07902	1.22833	1.04751	1.0344	1.63704	1.09615	1.90816	0.695652	1.36328	1.11964	0.976431	1.09256	1.1446	0.886792	1.19757	1.07623	1.06479	0.872236	1.11013	0.615925	1.21643	1.2213	0.799718	1.11852	1.09012	1.04798	1.40283	1.50844	0.849829	0.698381	1.54409	0.904437
ACVR2A-4	ACVR2A	x	0.848276	1.13725	0.697211	1.21318	0.799308	0.966887	1.17232	1.19167	1.47123	1.1126	1.41791	1.07222	0.691293	0.936803	1.18478	0.743333	0.888889	1.05414	1.04967	1.25	1.25098	1.0082	1.17045	1.11878	1.07473	1.15179	1.91475	1.17051	0.929499	1.02838	0.648829	0.625468	1.15534	1.01488	0.640927	1.07126	1.11005	1.18095	1.18807	0.842593	0.819444	1.07761	0.92284	1.36389	1.00443
ACVR2A-5	ACVR2A	x	0.699005	1.08478	0.674779	1.07812	1.12778	1.03846	0.978091	1.34194	0.991611	1.06076	1.09455	1.00289	1.04553	1.05882	0.866667	1.61795	0.778004	1.00699	0.730583	0.818386	0.981627	0.743346	1.20316	1.0233	0.774476	0.984456	1.38217	1.17091	0.964578	0.798621	0.737271	1.26237	1.55762	1.23387	1.16896	0.993798	1.2025	0.859903	0.946779	0.711475	0.761168	0.679785	0.598361	0.530928	0.563506
ACVR2A-6	ACVR2A	x	1.86628	0.917051	0.526549	0.947917	1.4186	1.13218	1.15591	0.802419	1.71635	1.38153	0.688963	0.945148	0.486239	1.4505	1.03913	0.987097	1.05446	1.56647	1.38037	1.12698	1.33136	1.00405	1.315	1.03	0.251185	2.36496	1.32061	1.2524	1.08084	0.827195	0.746667	0.734597	0.576531	0.819018	0.990385	1.5124	1.07527	0.869048	1.34911	0.796209	1.16279	1.40304	0.549763	1.1907	1.73384
ACVR2A-7	ACVR2A	x	1.39535	1.78333	1.75457	1.07711	1.53034	0.812357	1.50831	1.19561	1.7037	1.15134	1.00335	1.1697	1.36095	0.702703	1.40501	1.28421	1.25195	1.32955	0.862791	1.7673	0.982379	1.02245	1.22682	1.32803	1.40434	0.819118	0.920635	0.882934	0.994413	1.38682	0.946154	0.930175	0.839572	1.11786	1.41136	1.09075	1.33233	1.41479	1.144	0.750442	0.735507	1.50704	1.04602	0.903986	1.65594
ACVR2A-8	ACVR2A	x	0.441624	1.10734	0.233918	0.820312	0.794872	0.653409	0.577406	0.942105	1.2402	0.808824	0.759259	1.25926	0.807692	1.0411	0.976471	1.19149	0.871429	0.858025	0.460123	0.727273	1.01575	0.491124	0.675532	0.578431	0.522124	0.970588	0.472906	0.829431	1.21053	0.892377	1.24432	1.32278	0.0945946	1.20741	0.567227	0.627376	0.689922	1.06061	0.468085	0.635897	0.302041	0.457317	0.958974	0.481633	0.158537
ACVR2A-9	ACVR2A	x	1.23302	0.939063	1.08382	0.85596	0.883051	0.885246	1.09799	1.17625	1.33673	1.48338	1.07789	1.11817	0.956522	0.935127	1.32485	1.9724	1.33512	1.58974	0.833667	1.02048	0.76908	0.808989	0.914685	0.859813	0.856757	0.962138	0.773098	1.14559	0.840497	0.901718	0.967239	1.12481	1.37893	1.02509	1.20983	1.48582	1.01984	1.00575	1.0791	0.824581	1.38532	0.72229	0.397765	1.37877	0.666261
ACVR2B-1	ACVR2B	x	1.38869	1.3971	1.1755	1.14005	1.51703	0.882927	0.716075	1.44153	1.01636	1.1737	0.909091	1.25277	1.04627	1.3385	0.859155	0.997199	1.1978	1.37162	1.29773	1.03175	0.80758	0.602804	0.679287	0.694779	1.62402	1.47484	1.12896	1.03883	0.82363	1.53176	1.28406	0.912921	0.948586	0.943609	0.693706	0.970472	1.24028	1.29618	1.32056	1.7963	0.596311	0.786164	1.34656	1.06352	0.649895
ACVR2B-10	ACVR2B	x	0.892356	0.919162	0.637584	1.1205	1.14976	1.17978	0.652412	1.15595	0.651087	1.08198	0.789268	0.836472	1.23447	0.928678	0.784397	0.8675	0.753825	0.57772	0.716487	0.619694	0.664948	0.79564	0.813988	0.660502	0.921225	0.697275	0.747984	1.30385	0.823071	0.98756	1.06693	1.10878	1.47665	0.925854	1.1461	0.929091	0.62867	0.589425	0.597293	1.10998	1.1831	1.04757	1.14286	1.23185	0.93658
ACVR2B-2	ACVR2B	x	1.1223	1.32384	0.678899	0.928814	0.832776	0.942761	0.842391	1.11845	1.28753	0.82963	0.962801	1.194	0.701493	0.875	0.935593	1.17818	1.09554	0.916667	0.896373	0.845815	1.1747	1.09831	0.404762	0.504762	0.840659	1.0757	0.804245	1.01547	0.846449	1.06356	1.16667	0.803226	1.31065	1.0202	0.633803	0.85034	0.62069	0.903915	1.12146	1.04072	1.0914	0.761446	1.48869	1.69624	0.86747
ACVR2B-3	ACVR2B	x	0.883168	1.02226	0.952286	1.16008	1.03468	1.11028	1.14809	0.760837	0.797647	1.17076	0.982227	0.920538	0.779715	1.08059	1.31006	1.16185	1.09872	1.21505	1.18056	1.12043	1.20306	0.804444	0.770167	0.850659	0.888379	1.08919	1.19694	1.24072	1.10226	1.44784	1.08582	0.76673	1.77642	0.939394	0.961841	1.01765	1.29812	1.36154	0.892713	1.41389	1.04595	1.68892	1.26302	1.12432	1.92188
ACVR2B-4	ACVR2B	x	0.688995	0.677489	0.74478	0.838202	1.13151	0.935714	0.917172	0.670455	1.11447	1.11246	1.12685	1.04808	0.820084	0.909091	0.959427	1.30233	1.18927	1.09809	0.668281	1.01538	0.85396	0.450342	0.564912	0.596154	0.808421	0.932886	0.81982	0.997135	0.973088	0.872396	1.40749	0.965517	1.01005	0.820189	0.750422	0.894737	1.02965	0.930864	0.868347	0.576029	1.14611	0.951923	0.515206	1.16129	0.784615
ACVR2B-5	ACVR2B	x	0.955814	1.29293	1.18203	0.938429	1.18116	0.947631	1.27711	1.37526	0.697115	1.30401	0.674682	1.00732	0.957597	1.11529	1.33745	1.21928	1.43457	1.12095	1.45312	0.807107	0.925258	0.836614	0.737769	0.746296	0.891938	0.511785	2.07298	1.18322	1.01054	1.32221	0.978155	1.23389	1.34	0.711142	1.09484	0.677069	0.922879	0.721519	0.781711	0.969748	0.992593	0.767635	0.889076	0.77963	1.0083
ACVR2B-6	ACVR2B	x	0.927778	0.859459	1.41243	0.86385	1.21809	0.977901	1.21212	1.60753	0.772388	0.806349	1.06545	0.862903	0.948357	0.956522	1.23737	1.21143	1.55215	1.50625	1.2233	0.978836	0.89604	0.737226	0.715953	0.821862	0.902077	0.983713	1.42647	1.01132	1.21642	1.22302	1.01471	2.10784	1.94578	2.09053	0.591281	0.612536	1.66142	0.876712	1.76296	2.08716	1.93665	1.69869	3.17431	2.03167	1.25764
ACVR2B-7	ACVR2B	x	0.815126	2.09774	0.280822	0.991453	0.948148	1.03817	0.862069	1.32203	0.386364	0.63913	1.26341	0.7343	1.08485	0.773109	1.09756	1.20863	0.704225	0.59542	0.802721	0.478632	0.80315	0.736842	0.591837	0.75	1.51449	1.52941	1.13333	0.686636	0.961165	0.630435	0.512195	0.838235	1	1.1875	1.14035	1.5697	0.988889	0.846847	0.806723	0.912162	1.09302	1.26452	0.743243	1.88372	0.96129
ACVR2B-8	ACVR2B	x	1.33894	0.536408	1.22505	0.964885	1.07778	1.05405	1.23286	1.13716	0.9375	1.4708	1.17814	1.07054	0.987161	1.12863	1.09672	1.18049	1.09384	1.17047	0.798611	0.914286	1.08713	0.664656	0.743462	0.729226	0.764414	1.06979	0.858796	1.07079	0.810592	1.55783	1.87826	0.944966	1.00315	1.00209	0.93089	0.982877	0.943574	0.99661	1.16813	1.25714	0.817362	1.13088	1.03543	0.866967	1.01324
ACVR2B-9	ACVR2B	x	1.44258	1.24635	1.4977	1.31085	1.1201	0.914286	1.04674	1.38625	1.52962	1.36893	1.2292	1.27504	1.05139	1.39336	1.43151	1.1674	1.24279	1.63842	1.55394	1.623	1.26923	1.48536	1.31707	1.32043	1.21099	1.21711	0.998487	1.23881	0.836431	1.12861	1.55	1.35787	1.07778	1.28746	1.07143	0.767383	1.07614	1.21671	1.31198	1.1573	1.39226	1.05699	1.30712	1.63131	0.948187
ACVRL1-1	ACVRL1	x	0.0939597	0.139706	0.397351	0.929348	0.861111	1.0914	0.790476	0.798658	0.208092	0.678571	0.65097	1.26852	0.395437	1.11561	1.22652	0.701389	1.03497	0.559322	0.772727	0.617143	0.529412	1.05204	0.990338	0.860697	0.732794	0.661972	0.368217	1.68326	0.818681	0.597015	1.67361	0.335878	0.695312	1.04563	1.29185	0.809129	0.68254	0.569231	0.738095	0.650407	0.843972	1.12353	0.682927	0.177305	0.558824
ACVRL1-10	ACVRL1	x	0.570423	0.804533	0.561856	0.997326	1.07182	1.03535	0.700935	0.632184	0.898601	0.624332	0.767857	0.744597	1.3467	0.912596	0.63522	0.820856	0.813472	0.699405	0.718266	0.526316	0.809392	0.6337	0.651838	0.747292	1.0582	1.01163	0.621076	1.04823	0.972932	1.08153	0.725389	1.21728	1.55988	1.17813	0.910256	0.928244	0.847059	0.758112	0.743284	1.00576	1.43426	0.831239	1.68522	1.69522	0.48833
ACVRL1-2	ACVRL1	x	1.07343	1.22274	0.922865	0.954054	1.01714	1.2096	1.02935	0.95013	1.09673	1.01946	1.03181	0.961658	1.02244	0.971429	1.27671	0.796501	1.01905	0.995301	0.940866	0.876764	0.949853	1.04745	0.846797	0.961485	0.955513	0.912598	0.977751	0.790481	0.967026	0.814255	1.4219	1.22275	1.40814	1	1.00762	1.05185	1.17584	0.958333	1.17654	1.0212	1.07015	1.04632	0.876325	1.19685	1.15088
ACVRL1-3	ACVRL1	x	1.44615	1.33333	1.36232	1.38983	1.19403	0.901408	2.82895	1.14118	0.858974	0.801527	1.04167	1.23077	0.961039	2.18033	2.51064	1.14286	1.80303	1.31818	0.608108	1.24138	2.28125	0.743902	1.35211	0.915663	0.725275	2.38571	4.27397	1.11111	1.27068	1.37037	3.02857	2.46269	1.575	1.28767	1.375	0.728	2.2029	0.5	1.14754	1.0495	1.06087	1.52033	1.16832	0.608696	2.09756
ACVRL1-4	ACVRL1	x	0.901408	1.72917	1.0102	1.34286	0.973214	1.38889	1.17886	0.936047	0.892308	1.21134	0.836207	0.896739	0.546584	0.87156	1.25	1.30588	1.17284	0.383178	1.24286	1.17949	0.444444	1.21019	1.54369	1.76613	0.223684	0.768116	1.73958	0.879581	0.920245	1.66942	0.625	3	0.504202	1.40496	1.55705	1.27976	0.645833	0.8	0.850575	1.22156	0.931507	1.33333	0.976048	1.40411	1.87943
ACVRL1-5	ACVRL1	x	1.28539	1	0.82554	1.05668	1.0872	0.941696	1.36423	0.814935	1.36914	1.14522	0.944377	0.981934	0.740942	0.730408	1.09795	1.0963	0.922269	1.00419	0.904555	0.884314	0.849699	1.21212	1.50159	1.19342	0.855249	1.52506	1.42661	1.19424	1.14373	0.980456	1.29621	1.25376	1.16426	1.07524	0.797086	0.955013	0.770883	0.876744	0.786492	1.1958	0.862974	1.08717	0.865385	1.2449	0.804276
ACVRL1-6	ACVRL1	x	1.0176	0.925608	1.0873	0.99562	0.919084	1.17258	1.08528	1.18362	1.35484	0.881315	1.04279	0.824324	1.14647	1.26027	1.11984	0.807956	0.861601	0.994143	0.949126	1.10496	0.936482	0.830467	0.844578	0.950802	0.610272	0.72	0.8867	0.829618	1.00183	1.0611	1.16435	0.986072	0.600998	0.914043	1.19886	0.933817	1.24121	1.04662	1.06931	1.09174	0.646789	0.943853	1.11111	0.755046	0.840271
ACVRL1-7	ACVRL1	x	0.716049	0.890459	1.06706	0.94877	0.673077	0.637631	1.10864	1.10431	1.0625	0.852286	0.865143	0.878941	0.7	0.928196	0.702532	0.656192	0.926966	0.658203	0.822844	0.771226	0.521739	0.721212	0.842336	0.592219	0.718708	0.733333	0.428447	0.959607	0.958603	0.617618	1.46679	1.23512	0.773913	0.7319	0.895461	1.08852	0.721983	0.943107	0.855042	1.03041	0.94705	0.980149	1.32238	1.00756	1.31762
ACVRL1-8	ACVRL1	x	0.887019	0.608491	1.09882	1.28218	1.08652	0.935146	0.8544	0.609756	0.75614	1.12913	0.822443	0.69425	0.712406	0.832677	0.631491	1.01147	0.672606	0.93424	0.894737	0.66886	0.572062	0.641026	0.627273	0.75122	0.990138	0.517628	0.875346	0.961702	1.15479	1.01429	1.10682	0.946939	1.03462	1.06935	0.718588	1.03035	0.929293	0.610599	0.592683	0.690209	1.17792	0.604762	0.64687	1.13839	0.349206
ACVRL1-9	ACVRL1	x	1.4359	0.537367	0.870293	0.718615	0.962791	0.771429	0.875796	0.835484	0.669039	0.876543	0.654696	0.86901	0.967442	0.573913	1.30233	0.512195	0.55516	0.743802	0.737968	0.533708	0.3875	0.730769	0.88015	0.66877	0.380137	0.298851	0.76489	0.891688	0.667519	1.26869	0.567347	1.08108	0.940397	0.765343	1.12264	0.876506	0.933673	0.453659	0.724	0.717791	0.465909	1.29252	1.46319	0.602273	1.02381
ADCK1-1	ADCK1	x	1.12828	0.949318	0.971972	0.945344	0.978196	1.00556	0.933535	0.558269	1.00163	1.14655	0.943069	0.827899	1.01047	0.855696	0.901961	1.00311	0.955533	0.748824	0.847458	0.759553	0.824065	1.11284	0.896467	0.990349	1.2361	1.34373	0.753855	1.05776	0.957828	1.05543	1.25269	0.976577	0.950185	0.932515	0.904918	1.0602	0.868032	0.807606	0.820796	0.859615	1.03396	0.955256	0.941667	0.937358	1.01989
ADCK1-10	ADCK1	x	1.10262	1.20833	1.41935	0.938086	0.904762	1.2913	1.19916	1.2563	1.56228	0.96201	0.994975	1.00249	1.0293	1.19583	1.54015	1.46422	1.24896	1.11605	1.11547	1.22637	0.945133	1.43664	1.47712	1.14762	1.77457	1.38967	2.33895	1.03712	1.58089	1.08881	0.831839	1.98211	1.70763	0.965051	1.02743	1.00753	1	1.19759	1.1746	1.2023	1.40868	0.900943	0.998355	1.2515	0.839623
ADCK1-11	ADCK1	x	0.836314	0.803949	0.713846	1.17347	1.08219	1.0206	0.514357	0.799574	0.632231	0.903047	0.774955	0.836066	0.969657	0.933735	0.773031	0.708599	0.564	0.871951	0.976705	0.823529	0.848752	0.696782	0.792388	0.927655	0.87022	0.855124	0.788117	1.2789	0.999114	0.929984	0.666667	1.13212	1.33248	1.06785	0.937862	1.09715	0.610119	0.578176	0.644231	0.987514	0.450148	1.05694	1.18615	0.443238	1.35507
ADCK1-2	ADCK1	x	1.20957	2.05091	1.32885	0.94955	1.04569	0.911197	1.07229	1.23088	0.731225	1.26623	1.37196	1.24337	0.959318	1.16165	1.36727	1.05567	0.90894	1.15484	0.959933	0.951681	1.08637	1.45364	0.988873	0.950521	1.18464	1.574	1.10798	1.17994	0.859579	1.08585	1.31485	1.38449	0.703636	0.944323	0.999008	1.07068	1.04283	0.919325	1.20663	1.08023	0.963812	1.27577	0.903955	1.43788	1.32474
ADCK1-3	ADCK1	x	1.0603	0.70428	0.539432	0.952899	1.2201	1.18615	1.31013	1.72318	1.09851	1.72868	1.28455	1.21605	1.68864	1.23188	1.41473	1.47755	0.967742	1.65447	1.56951	1.18182	1.42922	1.16928	1.07865	0.928747	2.181	1.45192	1.4	1.13302	1.67857	1.05508	1.59774	0.773077	0.761905	1.28405	1.70732	0.952941	1.16	1.31455	1.42584	1.0274	1.81915	1.49383	0.819178	2.3227	1.15432
ADCK1-4	ADCK1	x	1.09783	1.27152	1.17987	1.32661	0.916522	0.976744	1.36569	0.814214	1.24806	0.827027	1.0011	0.907098	1.162	1.09325	1.2627	0.866889	0.925159	0.822764	0.691275	1.09946	1.05263	1.05211	0.88498	0.841096	0.748072	1.07396	1.56212	1.05044	0.870107	1.06091	1.01151	1.02439	0.798561	1.05677	1.34724	1.391	1.28902	0.992593	0.984099	1.32174	0.887061	0.830749	0.900621	0.632675	0.826873
ADCK1-5	ADCK1	x	1.26147	1.0625	1.53281	1.24714	1.09342	1.14961	1.27346	1.37255	1.28904	1.20175	1.28149	1.21421	1.14341	1.47843	1.43269	1.35531	1.71189	0.980213	1.25826	1.63489	1.92442	1.20677	1.27886	1.58148	2.03518	1.39157	1.29025	1.06308	1.11691	1.21154	1.58404	1.13864	0.990769	1.23586	1.06735	1.461	1.35829	1.3549	1.69136	1.58312	1.11726	0.835873	1.24297	0.807522	0.774912
ADCK1-6	ADCK1	x	1.23666	0.989189	1.01183	1.13117	1.03752	0.965007	0.942731	0.981079	1.33666	1.08388	1.21293	1.21629	1.25034	0.990385	0.967033	0.930295	1.17656	0.915646	1.12919	1.25126	1.08381	0.957958	1.17746	0.911894	0.905091	1.67022	1.16107	1.03355	1.06555	1.04714	0.891213	0.699599	1.12392	1.02409	1.08584	1.02791	0.978814	1.39902	1.28344	1.01973	1.18625	1.16461	0.930426	1.5133	1.56481
ADCK1-7	ADCK1	x	1.23433	1.31307	0.893297	1.14911	1.13302	1.09967	1.27145	1.16867	0.957203	1.08661	0.905325	1.14518	0.964392	1.03634	1.40954	0.931624	0.788608	1.06006	1.03587	1.08367	0.993255	1.20871	1.18424	1.08535	1.88258	0.972421	0.747027	1.08056	1.16434	0.98355	1.03022	1.52759	0.991014	1.07503	1.02344	1.18577	0.859091	0.795732	0.943574	1.6295	0.787554	1.24385	1.06954	1.12554	1.80629
ADCK1-8	ADCK1	x	0.687547	0.940549	1.03914	1.00992	1.0745	0.888244	0.808483	0.737981	0.858539	0.998252	0.821289	0.961123	0.945318	0.927484	1.26241	0.773251	0.909992	0.664684	0.931065	1.09176	0.835965	0.972119	0.696641	0.843666	0.967003	0.853211	0.758713	1.06689	1.35061	1.17806	1.245	1.00642	0.836941	1.04268	1.08177	1.08453	0.797331	0.92219	0.990449	1.32911	1.16023	1.09069	1.41365	1.02222	1.3125
ADCK1-9	ADCK1	x	0.839286	1.00431	0.742152	0.727984	1.07532	0.908873	1.07143	0.835443	0.899838	1.11337	1.11504	0.84507	0.960784	1.24145	0.945736	0.896552	0.747881	1.05779	0.737668	0.89604	0.882759	1.06857	0.797348	0.965385	0.965986	0.592105	1.19598	1.01923	0.944611	1.19637	0.863874	1.30909	1.04695	1.02652	0.844806	1.17907	1.05094	0.780749	0.9875	1.00187	0.535188	1.23944	0.597015	0.518822	1.30203
ADCK2-1	ADCK2	x	1.16638	1.13027	1.18151	1.07301	1.16998	1.04054	1.28195	1.31194	1.07074	1.06699	1.15553	1.28085	1.05925	0.806202	1.20249	1.11382	0.981132	1.17851	1.0324	1.27888	1.2334	1.06212	0.969432	1.01986	0.860349	0.930328	0.57766	0.947075	0.992723	0.970268	0.583732	0.925773	1.13957	1.26339	1.39531	1.01685	0.949731	1.11928	0.841176	0.837297	0.71201	0.651774	0.622028	0.729167	1.07622
ADCK2-10	ADCK2	x	0.691011	0.470149	0.810811	0.748603	1.12883	0.975309	1.1871	0.805263	0.465438	0.625954	0.917355	0.788991	0.52381	0.864198	0.954286	0.650307	0.827225	0.705202	1.22378	1.11921	1.09677	0.243363	0.612335	0.708108	0.782353	0.684729	0.593607	0.983766	0.679365	1.2898	0.377551	1.48428	0.522388	0.742991	0.656347	0.628906	0.572519	0.587097	0.715278	0.451613	0.797414	0.374468	0.435484	0.637931	0.131915
ADCK2-2	ADCK2	x	0.758575	1.0937	0.890164	0.883495	0.809826	0.924354	0.622378	0.67979	0.668187	0.844985	0.795455	0.772506	0.91954	0.718954	0.698957	0.618978	0.678333	0.788194	0.768421	0.819231	0.673394	0.578082	0.72144	0.580265	0.510571	0.566019	0.958391	1.01118	0.73814	0.776105	1.15467	0.759091	0.669449	0.648148	0.619141	0.552391	0.545276	0.676692	0.734615	1.22447	0.658092	0.851724	1.67815	0.930332	0.812644
ADCK2-3	ADCK2	x	0.47191	0.475	2.18571	0.894737	0.892308	1.02703	1.0229	1.09677	0.621622	1.06098	1.40426	0.858209	1.2069	0.951389	0.86	1.07895	0.392405	0.888889	2.17073	0.97619	1.70588	0.991228	0.78125	1.24074	0.0930233	3.24138	0.561644	1.04032	1.016	1.13669	1.91549	0.428571	1.37333	1.64	0.590909	1.38095	1.05085	1.64912	1.20779	0.432203	3.05263	0.288732	0.686441	3.57895	0.0985915
ADCK2-4	ADCK2	x	1.04801	1.62715	1.47273	1.16753	1.1092	1.05438	1.02041	1.19231	1.10156	1.1365	0.917293	1.42488	1.24295	1.31373	1.32831	1.52915	1.16056	1.17754	0.912014	1.0937	1.1489	1.20522	1.15192	1.0173	1.0333	1.31501	1.36988	0.95656	1.17458	1.15768	1.23143	1.55963	1.14406	1.25052	1.14286	1.02705	1.00803	1.14773	1.24582	1.85256	0.957311	0.713445	1.64487	1.23586	0.464181
ADCK2-5	ADCK2	x	0.991813	0.836888	1.57548	1.27226	1.00563	1.16625	1.14513	0.998935	1.16928	1.37396	1.20509	1.32196	1.2774	1.23783	1.10021	0.894366	1.17414	1.31849	1.1947	1.42133	1.60534	0.935176	1.04937	0.959685	0.824717	1.0268	1.32123	1.07571	1.15199	1.21022	1.04497	1.02628	0.741104	1.03202	0.957756	0.996271	0.995313	1.11643	1.04147	1.08475	0.934741	0.971058	0.549509	1.09309	1.33134
ADCK2-6	ADCK2	x	0.957806	0.934866	0.97449	0.676692	1.06422	0.794776	0.88189	0.737805	1.31156	0.786111	1.13333	0.987616	0.927966	0.809365	1.0375	0.827273	1.75909	0.978541	0.856522	1.05851	0.982379	0.876325	0.605505	0.548463	0.411405	1.05689	1.02494	0.694301	0.876676	1.38242	0.724252	0.888476	0.777328	0.694872	0.585034	0.912773	0.810945	0.631313	0.706422	1.11006	0.612308	0.860051	1.43082	0.449231	0.801527
ADCK2-7	ADCK2	x	0.689441	0.95122	0.95	0.744681	1.18095	0.813433	0.660633	0.907407	1.0184	0.928144	0.936416	0.917949	1.02206	0.722222	0.703947	1.7561	0.683871	1.27857	0.804124	0.940678	1.21649	0.595745	0.280899	0.818841	0.994253	0.838235	1.14925	1.05789	1.20513	1.10417	0.535032	0.850829	0.581395	0.696629	0.608247	0.795775	0.879433	0.752577	0.646552	0.461883	0.805085	1.52308	0.2287	1.32627	0.630769
ADCK2-8	ADCK2	x	0.986111	1.78448	0.723356	1.2896	1.049	0.908903	1.1286	0.832311	0.94188	1.16547	1.01648	1.24575	1.33858	1.37447	1.16368	1.37221	1.62884	1.12718	1.10266	1.69296	1.42821	0.888393	1.07504	0.830343	1.05341	0.883562	1.01698	0.952926	0.987245	1.0618	0.571702	2.08095	1.64191	0.788219	0.807648	1.14514	0.966006	0.946927	1	0.627645	0.311667	1.02595	0.770099	0.746667	1.38235
ADCK2-9	ADCK2	x	1.22545	0.92182	1.13636	1.31129	1.06853	1.03209	0.92767	1.14749	1.0158	1.46045	1.3753	1.48148	0.806758	1.11534	0.881004	1.01671	1.18936	1.19693	1.59562	1.2381	1.06824	1.10938	0.871542	1.0062	0.97035	1.38611	1.43469	1.04776	1.11435	1.20182	1.10329	1.08115	1.68224	0.779052	1.18957	1.02944	0.788382	1.1507	0.980769	1.20346	0.920142	1.11029	1.52814	0.730257	1.10102
ADCK3-1	ADCK3	x	1.22297	1.65347	1.20328	0.991176	1.13864	1.07647	0.958716	1.51572	1.41322	1.27941	0.936027	1.37718	1.54493	1.15044	0.917933	1.60595	1.05864	1.18373	1.99505	1.46894	1.32963	1.02842	1.26303	1.24257	0.981092	1.16706	1.24571	0.769363	1.04971	1.38494	0.439169	0.594388	1.39051	1.00951	1.21751	1.41649	1.29617	1.54422	1.18051	1.26146	1.16623	1.23478	1.50943	1.63325	1.2913
ADCK3-10	ADCK3	x	0.968657	1.12407	1.21573	0.915225	1.18506	1.00162	0.803871	1.16464	0.912073	1.20187	0.890086	0.930258	1.24109	1.07589	0.880215	0.848341	1.04539	0.959664	1.16064	0.85	1.12424	1.15502	1.18909	1.01821	0.829177	1.67404	1.02301	1.20679	0.994575	1.22797	1.5289	1.10417	1.56594	0.969283	1.49645	1.05489	1.04962	1.33663	1.37782	0.980834	0.650852	1.34647	1.14656	0.615572	1.42391
ADCK3-2	ADCK3	x	1.06984	1.09091	1.39635	1.10496	1.09152	0.84902	0.917182	0.992519	0.7657	1.20681	1.3076	1.20709	1.10035	1.31459	1.26857	1.27521	1.70438	1.30544	1.35041	1.21429	1.12453	0.938714	1.04644	1.18469	1.38659	0.973134	1.11856	0.918245	1.00701	0.885163	0.712644	0.723077	2.03605	1.16667	1.04308	1.44444	1.52817	1.16023	1.02198	1.48097	2.04978	1.03591	2.22679	3.07321	1
ADCK3-3	ADCK3	x	1.62694	0.952381	1.03704	1.34673	0.917293	1.08017	1	1.10811	0.738693	1.11813	0.945455	1.15761	1.1441	1.96682	1.73228	1.21983	1.07111	1.47317	1.20705	1.0717	1.25414	0.793548	1.2028	1.12581	1.51119	0.991018	1.29126	0.869231	0.965686	1.09577	1.40078	1.18067	0.923387	1.08096	1.26437	1.20899	1.10138	0.55665	1.44	0.672414	1.18729	1.5448	0.389655	1.50167	2.25448
ADCK3-4	ADCK3	x	1.85106	1.48968	1.43168	1.16576	1.00504	0.995402	1.13542	0.807203	0.791209	1.02071	1.09173	1.23009	1.31075	0.734831	0.884793	1.02065	1.54972	0.773087	1.02875	1.2415	1.09687	1.11265	0.932971	1.12766	0.789916	0.787611	1.22349	1.57411	1.23039	1.09677	1.40573	1.52145	1.26243	0.989297	1.34566	0.942623	0.907285	1.66327	1.22442	2.08173	1.15175	0.897655	1.66827	1.29377	0.982942
ADCK3-5	ADCK3	x	1.02998	0.803476	1.16056	0.90274	0.969697	0.954483	0.415859	0.63447	0.6569	0.875102	0.891061	0.971818	0.880376	1.30564	0.881119	0.470231	0.678571	0.948034	0.789565	0.691275	0.688442	0.769676	0.615901	0.646772	0.797009	0.833684	0.533737	0.980111	0.846847	0.939844	0.897076	0.944373	1.03023	0.936709	1.1506	1.14499	1.16396	0.648997	0.755074	0.533457	0.575993	0.760889	0.803903	0.700345	0.706667
ADCK3-6	ADCK3	x	0.653061	1.36689	1.71117	1.26115	1.08163	1.14398	1.00395	1.31972	1.13244	1.25392	1.25087	0.908676	1.02723	1.04215	1.26166	0.899244	1.03191	1.43769	0.948795	1.45833	1.5	1.14894	1.21987	1.12415	1.14552	1.04787	1.70667	0.801577	1.17284	1.07723	1.17808	1.41422	1.08215	0.863142	1.05357	1.22656	0.956633	1.25	0.950685	1.2069	1.01868	1.02435	1.73631	1.08998	0.933913
ADCK3-7	ADCK3	x	1.40407	1.61296	1.24686	1.13375	1.07735	1.13051	1.23553	1.23734	0.898601	1.51874	1.10753	1.70538	0.636746	1.00872	0.915456	1.74775	0.952456	1.39872	1.0384	1.13142	1.35744	1.19048	1.31608	1.16276	0.953717	1.28537	0.815126	1.45421	1.03441	1.27539	1.09259	0.838855	0.935351	1.08005	0.77507	0.840415	1.11708	1.20265	1.24764	1.02823	1.15986	1.15014	0.676075	1.5	0.825779
ADCK3-8	ADCK3	x	1.71429	1.85753	1.22066	0.979769	1.08013	1.19209	1.2084	1.12367	1.24014	1.73846	1.2885	1.40798	1.4	1.24932	1.24934	1.83282	0.920635	1.39947	1.43771	1.55363	1.47667	1.01972	1.4389	1.32483	1.21938	1.38776	1.54444	0.973013	0.907743	1.01692	1.28963	0.949333	1.34817	1.58091	1.21617	1.78924	1.95484	1.47813	1.61371	1.74011	1.05106	1.86717	1.64783	1.44542	2.24288
ADCK3-9	ADCK3	x	1.40793	1.28745	1.53374	1.23134	1.04082	1.03571	1.42733	1.15805	1.01639	1.20328	1.06927	1.30841	1.59726	1.32479	1.22945	1.44782	1.43176	1.05671	1.14192	1.35545	1.59251	1.12274	1.1773	1.267	1.15689	1.63636	1.78611	1.06234	1.0612	0.937738	1.60215	1.20656	0.980952	1.6087	1.04558	1.1321	1.30848	1.17476	1.5093	1.58333	1.64274	0.747253	1.28488	1.98497	1.50078
ADCK4-1	ADCK4	x	1.48387	1.23907	0.962217	1.14332	1.04	1.04706	1.44619	1.92272	1.42333	1.34959	1.39845	1.05825	1.03297	1.2933	1.32063	1.28829	0.857558	1.23098	1.49492	1.28467	1.42857	1.32464	1.58065	1.4033	1.98163	1.8685	1.95082	1.02773	0.675969	0.932341	1.26471	1.85304	0.888268	0.826159	1.52123	2.12853	1.19565	1.08772	1.47872	1.34511	1.12115	1.40308	1.1684	1.14374	0.951542
ADCK4-10	ADCK4	x	1.45143	0.4375	1.46354	0.877451	1.22222	0.984694	2.01047	0.889571	0.702703	0.740602	0.733945	0.65	1.1393	0.940171	0.759615	0.827103	0.944444	1.07009	1.13873	0.890052	1.86726	0.644195	1.84293	1.09829	0.5	0.78125	0.684444	0.886076	0.919771	0.655786	1.49763	0.768293	0.546875	0.83121	0.673522	1.0632	1.27632	1.55414	1.27381	0.440789	0.800752	0.560261	0.940789	0.819549	0.478827
ADCK4-11	ADCK4	x	0.876786	0.777933	0.583201	0.75	0.817851	0.705584	1.44737	1.23155	1.47106	0.423457	0.630566	0.526442	0.725455	0.735751	0.593103	0.75625	0.737537	0.79538	0.469083	0.430928	0.564815	0.707006	0.672282	0.679573	0.817073	0.707595	0.700709	0.830957	0.784483	0.802457	0.85381	0.843609	1.01043	0.626087	0.822973	0.629592	0.94685	0.715771	0.905325	0.82283	0.764398	0.557478	0.72176	0.539267	0.504326
ADCK4-12	ADCK4	x	1.47568	1.08488	1.12195	0.833333	0.741855	1.00282	1.20042	1.91724	1.27789	0.577586	0.61985	0.653543	1.11161	0.835821	0.790634	0.744737	0.784091	1.21939	0.560494	0.994012	0.862745	0.825792	0.851779	1.1573	0.881057	1.07839	0.942792	0.663781	0.686244	0.65457	0.845679	0.64554	0.67706	0.959707	0.992263	0.83876	1.1358	1.03207	0.747945	0.824834	0.725806	0.606838	0.789357	0.820565	0.465812
ADCK4-13	ADCK4	x	1.064	0.881081	1.14121	1.10112	1.33232	0.838275	1.74444	1.07368	1.66216	0.613065	0.801653	0.777778	1.18106	1.00583	0.916449	1.29794	0.971347	1.22985	0.956522	1.75694	1.50641	1.06053	0.984199	1.24779	0.584906	1.91169	0.736471	0.963608	1.11327	0.872077	0.532637	1.51247	1.32192	0.861818	0.742806	0.716981	1.01441	0.980456	0.871795	0.958963	0.770386	0.894958	0.62419	0.54721	0.653361
ADCK4-14	ADCK4	x	1.22793	1.36195	1.40351	1.26681	0.896226	0.881783	1.11215	1.74257	1.90016	0.943757	0.67666	0.753181	0.989583	0.910781	1.119	1.33996	1.43908	1.07414	1.35908	1.15833	1.03886	1.09242	1.10143	1.2701	1.57094	0.726667	1.28036	0.887471	1.0024	1.07234	0.985043	1.84346	1.30857	1.32033	1.00693	0.963446	1.13319	1.03902	0.992537	1.14986	1.32799	1.01831	1.00865	1.43149	0.990141
ADCK4-2	ADCK4	x	0.975904	1.3265	1.39635	1.22936	1.16847	1.12422	1.17537	1.2971	1.39408	1.43945	1.3547	1.34058	1.27088	1.13697	1.39483	1.06958	1.44429	1.3363	1.94991	1.31711	1.54758	1.48619	1.41998	1.4527	1.54926	2.11424	2.19466	1.15612	1.09587	1.19234	1.89821	1.45481	1.46852	1.56321	1.31053	1.14299	1.00297	1.37801	1.29846	1.20552	1.50552	1.39688	1.71472	1.81678	1.45312
ADCK4-3	ADCK4	x	1.30488	1.28028	0.921296	0.824	1.29412	1.3871	1.64341	2.33898	1.19565	1.20397	1.52797	1.21965	1.11742	1.03986	1.76	1.20084	1.66038	1.42041	1.37838	0.685921	0.915	1.04096	1.38387	1.43772	2.5625	1.59216	1.21032	1.2065	1.14521	1.23175	1.71239	2.23846	2.109	1.85449	1.16615	1.60932	1.80288	1.63861	1.57325	0.46875	1.2724	1.93396	0.53125	0.759857	1.83962
ADCK4-4	ADCK4	x	1.23429	1.13836	1.4557	1.11111	1.07979	1.19178	1.39269	1.64407	1.86058	1.2907	1.32203	1.30717	1.18653	1.58537	2.14865	1.40828	1.70857	1.14103	2.1	1.61146	1.66667	1.24638	1.56915	1.1164	1.10231	1.00922	1.51802	0.83526	0.871212	1.46124	0.835714	2.22308	1.10949	1.20339	1.36598	0.910714	1.47945	0.947368	2.00709	0.917323	0.99569	1.99422	0.511811	0.922414	2.09249
ADCK4-5	ADCK4	x	1.75719	1.45455	1.38095	1.29534	1.32626	1.21136	0.922642	1.6199	1.41343	0.927431	1.08274	0.835561	1.03106	1.23158	1.4378	1.42506	1.277	1.06944	1.49444	1.38051	1.36111	1.57918	1.26891	1.42084	1.26562	1.62684	1.26054	1.08722	0.981227	1.16617	1.66818	1.27294	0.586057	1.30782	0.867232	1.31532	1.12219	1.2681	1.5571	0.793165	1.15287	1.12928	0.620504	1.33121	1.04673
ADCK4-6	ADCK4	x	1.04751	1.15895	1.0439	0.885572	0.90364	0.908235	0.97561	0.966722	1.33538	0.882443	0.789621	0.774885	0.79249	0.963283	0.808333	1.2181	0.694444	1.22892	0.916667	0.736573	0.584323	0.772242	1.14607	0.910946	0.815789	1.2575	1.41317	0.848355	0.933071	1.2746	1.17184	0.767241	1.43788	1.15537	0.752577	0.80303	1.05379	0.919395	0.970252	1.01849	0.935535	0.843352	1.22521	0.641509	1.76867
ADCK4-7	ADCK4	x	0.751163	1.23598	1.06136	1.06947	1	0.978044	1.35385	1.42087	1.26325	0.628242	0.683356	0.713296	1.0411	1.30536	1.12607	1.13423	1.12766	1.32019	0.983133	1.10918	1.15297	1.25042	1.26104	1.24349	1.61332	1.33135	1.0048	1.29012	1.10165	1.18194	1.53968	0.443992	1.04492	0.870466	0.952191	0.868452	1.01408	1.136	1.10744	1.07348	1.18439	0.853435	1.22684	1.55482	0.945038
ADCK4-8	ADCK4	x	0.543367	0.960619	0.604278	1.11492	1.10703	1.09375	1.57534	1.05094	1.27045	0.776618	0.623596	0.663121	0.974874	0.960383	0.814448	1.19081	0.987988	0.97553	1.17347	1.20719	1.04065	1.12457	0.902466	1.09581	0.570648	0.6344	1.18276	1.18419	1.07581	0.941794	0.986466	0.747559	1.11261	1.00535	0.804035	0.986315	0.867491	0.993344	1.02131	0.782299	0.927869	0.92766	0.519837	0.769399	0.659574
ADCK4-9	ADCK4	x	0.781095	0.548246	0.433673	0.88024	0.946429	1.05031	1.27907	1.20629	1.08065	0.858268	1.24314	0.748062	0.861446	1.04571	0.909091	1.0274	1.12644	0.815029	1.34921	0.915254	1.01183	0.795122	0.960674	0.68559	1.16889	0.599369	1.7625	0.675768	0.694444	1.13774	1.25568	0.291667	0.67	0.87218	0.702454	0.753994	1.53801	1.16049	1.65217	0.630996	0.445378	0.924883	0.361624	0.52521	0.629108
ADCK5-1	ADCK5	x	0.856041	0.872286	1.02599	0.930949	1.14868	0.986164	0.94274	0.924743	1.0216	1.06417	0.988682	0.716499	0.98037	1.06866	1.04027	1.17085	1.16134	1.03522	0.971037	1.22269	0.98786	1.07848	0.930233	1.0352	0.9713	0.831471	0.728769	0.916	0.978038	1.17595	1.12227	0.715496	1.1917	0.81749	1.00583	0.872146	1.06981	1.02422	0.962025	1.44362	1.05998	0.793805	1.25319	1.04425	0.574336
ADCK5-10	ADCK5	x	0.665132	0.745197	0.726692	0.92619	0.904494	0.895762	0.653884	0.758865	0.718525	0.991611	0.856312	1.0497	0.830169	0.959514	0.859813	1.084	0.651111	0.847059	1.16558	0.924933	0.91516	1.17834	0.885714	1.00998	0.827525	0.935791	0.730028	0.873692	0.810484	1.02714	0.778125	0.766319	1.2027	0.78626	0.826707	0.737075	0.878187	1.3097	0.834239	0.744118	0.637264	0.813996	0.676471	0.534653	0.701657
ADCK5-2	ADCK5	x	1.1118	1.85285	1.17493	0.965318	1.12958	1.14458	1.29736	1.22045	0.769531	0.865209	0.968566	1.079	1.37846	1.42718	1.19338	0.80397	1.2551	1.11142	1.12211	1.29514	1.45017	1.02529	1.01412	1.20053	1.78497	1.14797	1.34965	0.894654	1.43514	1.15294	0.907543	1.16021	1.6776	1.19333	1.01844	1.06522	1.38384	1.64516	1.16981	0.94929	0.868154	1.47229	0.565923	0.590264	1.4988
ADCK5-3	ADCK5	x	0.740331	0.990228	0.941363	0.926782	0.99811	0.93662	0.641154	0.760646	0.809032	0.750983	0.85	0.879581	0.886654	0.768439	0.653418	0.926573	1.14116	0.912281	0.881764	0.647638	0.832558	0.835674	0.918966	0.595477	0.575137	0.800716	1.17251	0.893796	0.770541	0.953908	0.431918	0.864957	0.462462	0.768675	0.706161	0.820265	1.05618	1.08193	1.03929	0.725849	1.3361	0.949602	0.946475	1.7886	0.896552
ADCK5-4	ADCK5	x	0.833037	0.902027	0.777778	1.2573	1.01007	1.0303	1.11041	0.917488	1.02442	1.11625	0.86133	0.688636	1.08308	1.10282	1.24916	0.905512	1.11379	0.834532	0.561012	0.777778	0.769492	0.889959	1.00663	0.859137	0.805907	0.564894	0.719595	1.29107	1.84678	1.05869	0.726859	1.36738	0.676336	0.866292	0.885822	0.957359	0.837251	1.21281	0.89881	0.667045	1.43612	1.0869	0.738636	2.14244	0.79471
ADCK5-5	ADCK5	x	1.11392	1.32008	0.787625	0.974684	1.02457	1.09107	1.20308	0.677175	0.947605	1.37644	1.08422	1.13873	1.2116	1.27521	1.69245	1.37431	1.3594	1.00705	1.30237	1.0907	1.38124	1.01583	1.00825	1.11382	1.07692	1.04041	1.031	0.994541	1.01286	1.0735	1.41294	1.56038	1.125	0.920094	1.09012	0.922652	1.23555	1.12977	1.24597	0.914508	1.52645	1.16121	1.33938	1.46194	1.05668
ADCK5-6	ADCK5	x	0.524548	0.982234	0.792746	0.740659	1.05042	0.661253	0.47619	0.64564	0.384158	0.933602	0.686695	0.677027	0.846361	0.652174	0.690289	0.86217	0.933962	1.04323	0.5775	1.03815	0.667391	0.728395	0.583851	0.56044	0.821862	0.528302	0.64539	1.13081	1.06181	0.775964	0.944282	0.427441	0.686667	0.981884	0.752125	0.735513	0.734328	0.79403	0.863222	0.791011	0.605455	1.24053	0.831461	0.641818	0.909091
ADCK5-7	ADCK5	x	0.818274	0.785924	0.819756	0.973031	0.98665	0.844809	0.797166	0.710092	0.803478	0.636086	0.774606	0.817971	0.78211	0.930481	0.844728	1.04373	1.06122	1.08333	0.912048	1.22416	1.11662	0.919851	1.11652	0.957171	0.556465	0.730732	0.767164	1.06287	1.03319	1.12283	0.702988	1.01307	1.17868	1.16418	0.909861	1.03986	0.750562	0.733333	0.852058	1.51797	1.12987	0.673677	1.67969	0.838474	0.908629
ADCK5-8	ADCK5	x	1.02444	0.911168	0.661565	0.992188	1.15909	1.09449	1.01338	0.866438	0.815592	0.973716	0.795181	0.927861	1.02948	1.01852	0.718166	1.10902	1.32265	1.16199	1.39141	1.14957	1.15904	1.20104	1.25354	0.985075	0.813984	0.791165	1.07226	0.894231	0.998701	1.06213	0.722008	1.08434	1.23844	0.878685	1.16879	0.694898	0.957115	1.0237	1.07175	1.53401	0.616959	0.9179	1.90136	0.814327	0.794078
ADCK5-9	ADCK5	x	0.503949	0.88478	0.785714	0.974403	1.03783	1.07286	1.17206	1.44345	0.917079	0.814577	0.867742	0.885157	0.785953	0.652108	0.743626	1.42802	0.940692	1.05882	1.24765	0.873311	1.08748	1.00142	0.968072	0.815013	0.789144	1.2185	0.828636	0.816956	1.08755	1.17173	0.918836	0.501534	0.799629	0.778474	0.867615	0.883693	1.3252	0.958333	1.07143	0.955168	0.845878	0.666295	0.858032	0.683393	1.00446
ADRBK1-1	ADRBK1	x	2.7	0.375	1.13333	1.35366	0.789474	0.821429	0.342857	0.346667	0.0108696	0.708333	0.794118	0.686131	1.06173	1.31683	1.48649	0.773585	0.565217	0.948718	0.77027	0.837209	0.870968	0.891892	0.566372	0.720339	0.31	0.180851	0.714286	2.01266	1.1	0.252632	0.367347	0	0.925926	1.03061	1.40244	0.308511	1.04545	0.9375	0.431818	0.163265	0.344262	0.307692	0.0612245	0.721311	0
ADRBK1-10	ADRBK1	x	1.23684	0.943162	0.760779	1.22991	1.04659	1.0331	0.68974	0.770308	0.853837	1.18038	1.14221	0.959444	1.07475	1.0678	1.18114	1.39748	1.20826	1.4792	1.44057	1.1981	1.51835	1.4209	1.32795	1.41265	1.07215	0.897277	1.15489	0.898089	0.977437	1.07905	0.789326	0.808442	1.06769	1.37547	1.01543	1.0738	1.15619	1.32156	1.1875	1.69823	1.61722	1.27725	1.44823	2.30981	1.18304
ADRBK1-2	ADRBK1	x	1.08519	0.751037	0.982394	1.14773	1.14885	1.54585	0.308782	0.688822	0.878531	1.0824	1.0711	0.96063	1.0318	1.14463	1.44488	0.747967	1.18219	0.859438	1.14231	1.23188	1.26172	1.39266	1.59272	1.47385	0.716463	0.982222	0.786408	1.40086	1.20804	1.08072	1.2972	0.850427	0.910931	1.29975	0.815789	1.31627	0.996	1.33649	1.07595	1.1726	0.887043	0.82263	1.08219	0.797342	0.568807
ADRBK1-3	ADRBK1	x	1.06914	0.907463	1.12537	1.08303	1.16311	1.21281	0.0692935	0.200726	0.166279	0.813333	1.03281	0.847953	0.634703	0.70194	0.895137	0.762951	0.496403	0.621212	0.992908	1.30214	1.11208	0.63875	0.703794	0.653386	1.02433	0.964126	1.08203	0.838323	0.985714	0.925688	0.562687	0.267091	0.604569	0.9375	0.751183	1.02527	0.732558	0.944162	1.08717	1.00103	0.852205	1.66328	1.33333	0.666269	1.13898
ADRBK1-4	ADRBK1	x	0.84456	0.879815	0.912664	0.960254	0.836641	0.942122	0.143965	0.0901235	0.09601	0.728733	0.785915	0.901152	0.464096	0.560294	0.522465	0.404601	0.60199	0.566225	0.689211	0.87619	0.824034	0.686806	0.747222	0.622688	0.582716	0.658046	0.674654	0.726625	0.981763	1.33816	0.451852	0.448161	0.32381	0.998942	1.09158	0.901246	0.967509	0.781753	0.79402	1.15368	0.912383	0.97549	1.06105	0.790888	0.857843
ADRBK1-5	ADRBK1	x	1.19708	1.2533	1.19643	1.23939	1.08798	1.10811	0.837736	1.01606	1.17009	1.21831	1.29913	1.2467	1.27575	1.41918	1.35398	1.16452	1.32845	1.21148	1.11921	0.977778	1.87246	1.2524	1.27021	1.17391	1.50704	1.22392	1.21546	1.34732	1.13344	1.31439	0.770335	1.81818	0.900568	1.16052	1.04188	1.2438	0.948718	1.40491	1.21239	1.2095	0.62749	1.34921	1.29806	0.766932	1.55556
ADRBK1-6	ADRBK1	x	0.890306	0.925581	1.01944	1.09023	0.857143	0.958515	0.191142	0.142857	0.102293	1.01622	0.687954	0.955906	0.577681	1.12401	0.435855	0.453581	0.754098	0.737705	0.86059	1.07071	1.07243	0.785965	0.759016	0.748418	0.822733	0.693798	1.08548	0.935154	0.885993	1.33539	0.21021	0.367978	0.473008	0.866571	0.80303	0.944171	0.80429	0.928358	0.776119	1.11337	1.06458	1.09532	0.79357	1.22917	1.34448
ADRBK1-7	ADRBK1	x	0.732538	0.863063	0.777293	0.581699	0.672978	0.793867	0.159251	0.0984529	0.161954	0.818074	0.585912	0.77639	0.334405	0.517949	0.429652	0.430127	0.545133	0.370656	0.542683	0.650602	0.66302	0.423077	0.509777	0.506964	1.10312	0.411392	0.830966	0.557987	0.9	0.807159	0.36227	0.363469	0.684492	0.676823	1.07878	0.73506	0.575049	0.727463	0.563441	0.738402	0.838037	1.4146	0.556701	0.804908	0.698758
ADRBK1-8	ADRBK1	x	0.762014	0.738928	1.34737	0.986702	0.858974	1.0363	0.347319	0.246032	0.400438	0.831309	1.09666	1.01975	1.28097	0.629442	1.1069	0.771028	0.504902	0.6	0.878995	1.12458	1.4375	0.826754	1.07692	0.997904	1.94143	1.65631	1.83158	1.03511	1.09062	1.13643	1.775	0.787286	0.839779	1.07983	0.668022	0.769492	1.06745	1.04558	0.75076	1.62177	1.24578	1.96943	2.21956	0.917448	1.49782
ADRBK1-9	ADRBK1	x	1.41912	1.60744	0.696	0.932	1.36752	0.581169	0.42577	0.607955	0.527163	0.954003	1.1002	0.903808	1.09	0.886719	0.783476	1.02765	1.23849	0.433898	1.13559	1.29365	0.51341	1.20552	1.15849	1.4127	1.14081	0.618582	0.844186	0.712177	1.10722	1.21364	1.01379	1.42056	0.537931	0.940083	1.15538	0.890203	1.21951	0.929577	0.559701	0.922705	1.01453	2.07429	0.591787	0.991279	2.46571
ADRBK2-1	ADRBK2	x	0.867953	0.73752	0.755408	1.06606	0.85738	0.848083	0.749478	1.01735	1.13748	0.967805	1.15448	0.9375	0.911392	0.739247	1.00152	0.912981	0.843049	1.06539	0.714012	1.0813	0.926606	0.951469	1.219	0.921019	1.45012	1.45308	1.08333	1.03729	1.18711	0.915567	1.32428	0.688923	1.46338	0.800481	0.648579	1.15173	0.93945	0.878683	1.0494	1.30467	0.740209	1.54255	1.60565	0.898172	1.28617
ADRBK2-10	ADRBK2	x	1.07857	1.44773	1.45185	0.971491	1.20788	1.27098	0.820327	0.889273	1.35684	1.47994	1.49788	1.05219	1.88915	1.80995	1.46329	1.03211	1.05687	1.77285	1.56944	1.86649	1.52758	1.25532	1.45189	1.19217	0.981402	1.66472	1.58641	0.99084	1.11377	1.18605	1.79449	0.970655	0.594972	1.27159	1.32143	1.35	1.25077	1.28158	1.207	1.25088	2.08465	0.837128	1.59187	3.55118	0.777583
ADRBK2-2	ADRBK2	x	1.18508	0.682741	2.28125	1.12291	1.05471	1.05962	1.01595	1.01717	1.02239	1.03476	1.12811	1.02135	1.37082	1.0267	0.653933	0.840102	0.926702	0.92876	1.94239	1.32571	1.29306	1.04989	1.04701	1.09481	1.5415	2.4385	1.34297	1.05271	1.31418	1.25276	0.838527	0.596923	0.745358	0.96699	1.22926	0.964945	1.08157	1.05382	1.17572	1.37563	0.839252	0.915832	1.37229	0.613084	1.29459
ADRBK2-3	ADRBK2	x	1.10598	1.10225	0.788889	1.03586	0.912381	1.01282	1.08426	1.14326	1.05299	1.11384	0.970657	1.05753	1.03994	1.25726	0.952537	0.773171	1.18068	0.70826	1.19413	0.961039	0.915888	1.11737	0.955157	0.811218	0.88209	0.896104	0.764921	0.945102	1.1509	1.22968	1.31356	1.4495	0.767606	1.08619	1.03305	1.3254	1.13391	1.2906	0.91875	0.556579	0.964798	1.21074	1.11053	0.728814	1.03087
ADRBK2-4	ADRBK2	x	0.951049	0.686515	1.17915	0.938182	1.02642	1.02513	0.854083	0.906722	1.03303	1.25352	1.04054	1.08376	0.87055	0.735938	0.755187	0.927686	1.08492	0.86645	0.824111	0.943277	1.0592	1.0892	0.900763	0.924177	1.32594	1.03164	2.03056	1.06282	1.0314	1.20069	0.809773	1.08033	1.73381	1.13802	0.899363	1.11006	0.915811	0.794677	1.02088	0.79927	0.942893	1.5679	0.722628	1.07995	2.02195
ADRBK2-5	ADRBK2	x	0.929368	0.924354	1.27273	0.96	0.964912	0.963671	0.871272	0.871601	0.997264	1.07231	0.886957	0.957627	1.27435	1.03357	0.85	0.943089	0.853333	1.10897	0.931507	1.05727	0.907767	0.870242	1.00632	0.712698	0.748	1.15426	1.17829	0.990453	1.17603	0.815331	0.909091	1.65256	0.974304	0.817391	1.03198	1.02972	0.87007	0.843182	0.915948	1.91501	1.35724	0.718543	2.69259	1.29748	0.730132
ADRBK2-6	ADRBK2	x	0.97875	1.21007	1.1911	0.984658	1.12207	1.14759	1.31446	1.32975	1.23957	1.30476	1.31466	1.25356	1.1895	1.46487	1.00518	1.25171	1.20085	1.09834	1.11645	0.963904	1.06702	1.46294	1.22623	1.29127	1.19961	1.58854	1.09946	1.1072	1.05064	1.13742	0.910837	0.782609	1.45894	1.20503	0.946208	1.09921	1.15933	1.15094	1.35238	0.848039	1.12513	1.0712	0.831373	1.18922	0.801275
ADRBK2-7	ADRBK2	x	1.07516	1.01552	1.47122	1.09286	1.03725	1.10451	1.14419	1.00829	1.65416	1.11227	0.990184	1.09766	1.05018	0.981544	0.825279	0.972656	1.31238	0.962547	1.46117	1.08333	1.02887	1.37031	1.03988	1.0748	1.09467	2.0852	1.60742	1.1039	1.40975	1.17391	0.957115	1.12778	1.24354	1.0362	1.06396	1.0179	1.37561	1.2949	1.15335	1.09218	0.983824	0.862978	0.953911	0.992647	0.916996
ADRBK2-8	ADRBK2	x	1.25135	0.73057	1.74044	0.840964	1.22687	1.08895	1.56731	0.846957	1.49689	1.14307	1.40422	1.2488	1.77354	1.5142	1.52261	1.68466	1.24105	1.65527	1.14074	1.27381	1.27851	1.39512	1.67376	1.16514	1.89483	2.15385	3.0566	1.06499	0.994194	1.10188	1.62319	1.25436	0.997041	1.20786	1.69913	1.34601	1.69529	1.14011	1.64725	1.17505	1.29959	0.864629	1.22538	1.50207	1.19214
ADRBK2-9	ADRBK2	x	0.962963	0.986971	1.1874	0.788269	0.884194	1.01064	0.800532	1.02091	0.847337	1.02083	0.840801	0.945298	1.1849	0.833554	1.10645	0.812785	0.905344	1.28544	0.882867	0.941781	0.864312	0.778739	0.812649	1.02188	1.43587	1.11385	1.6093	0.9	0.939338	0.965944	0.665079	1.14686	0.867872	0.889558	1.06091	0.912281	0.911504	0.960289	1.00818	0.76943	1.18123	1.16768	0.57772	0.876607	1.50911
AKT1-1	AKT1	x	1.43612	1.14022	0.935622	1.16981	1.04292	1.33981	1.5977	1.72527	1.81884	0.832941	1.20379	0.794372	1.30709	0.845638	1.3861	1.52174	1.60163	0.783898	1.28022	0.853982	1.84076	1.19231	1.29921	0.647815	0.733184	1.20367	1.01351	1.33584	1.35567	0.832487	0.568282	0.572549	0.586466	0.986928	1.09635	0.966921	1.08835	1.29947	1.22105	1.90071	1.1137	1.60606	1.20213	0.717201	2.72424
AKT1-10	AKT1	x	0.495069	0.589633	0.854664	0.829787	0.835938	0.86406	0.407186	0.52847	0.860384	0.704307	0.700606	0.745121	1.05501	0.893738	0.808824	0.291572	0.643021	0.696517	0.670306	0.746959	0.84984	0.777397	0.761364	0.873122	0.362687	0.493799	1.17816	0.949303	0.681934	0.884709	0.929515	0.654731	1.06342	0.726064	0.584135	0.776101	0.510345	0.586035	0.511057	0.653274	0.82392	0.502046	0.395833	0.895349	0.33015
AKT1-11	AKT1	x	1.23561	1.33833	1.20284	0.797527	0.835466	0.970315	0.888406	0.637084	0.696429	0.810664	0.897468	1.02751	0.900169	0.993671	0.866319	0.87344	1.00576	0.986231	0.99802	0.961672	0.992467	0.893557	0.847569	0.954357	0.551227	0.632924	1.10137	0.863122	0.83871	0.604191	1.27239	1.12039	0.769697	0.945612	0.917251	0.867081	0.586066	0.869359	0.604508	0.822257	0.777939	0.567308	0.62442	0.518142	0.383242
AKT1-12	AKT1	x	0.968113	0.902309	1.21975	0.864621	0.952333	0.998979	0.934272	0.801434	0.798479	0.710224	0.851351	0.889262	0.927574	1.1296	1.08519	0.855502	0.702944	0.884655	0.872054	0.761134	0.706929	1.08003	0.98414	1.04859	0.831911	0.566904	0.795608	0.737661	0.64862	0.577343	1.36056	0.928274	0.977713	0.94854	0.897608	0.919387	0.742824	0.720639	0.717785	0.769346	0.821603	0.567301	0.351615	0.844599	0.603946
AKT1-2	AKT1	x	0.973856	1.6448	1.48636	1	1.02004	1.21114	1.17422	1.24363	1.17426	1.16971	0.704811	1.22807	1.54699	1.38755	1.17402	0.783843	1.1011	1.11386	1.19868	1.47826	1.36818	1.36349	1.32472	1.41599	1.04125	0.878403	0.88383	1.08105	1.03738	1.10345	1.01887	0.975336	0.907725	1.14228	1.27545	1.95528	1.525	1.00231	1.10029	1.27339	0.937956	0.980108	1.30092	0.69708	0.924051
AKT1-3	AKT1	x	0.824658	1.10155	0.727654	0.763274	0.916372	1.11554	0.805339	0.627907	1.01448	0.599404	0.704107	0.58435	0.792008	0.997714	0.840728	1.0486	0.981982	0.759232	0.532895	0.609244	0.711326	0.835907	0.961812	1.05373	0.718399	0.61595	0.717791	0.790336	0.74606	0.638801	0.786148	1.21816	0.427567	0.863994	0.870879	0.748031	0.406069	0.410334	0.563011	1.11672	0.574297	0.809322	0.882295	0.587349	0.789195
AKT1-4	AKT1	x	1.05568	0.92616	1.05345	0.88642	0.860731	0.99446	0.595281	0.7625	0.851016	0.89769	0.994555	1.0864	0.794811	0.971631	1.57558	0.864721	0.905312	0.75	0.649077	0.634877	0.76435	1.08555	0.836978	0.786667	0.787018	0.830986	0.46299	0.959302	1.02635	0.705449	1.44869	1.05442	0.982222	0.815906	0.908612	1.04042	0.704225	1.14423	0.870253	0.383333	1.0397	0.573333	0.287037	0.688091	0.611429
AKT1-5	AKT1	x	0.592593	1.40122	0.810256	0.831325	0.918919	0.821538	0.994885	0.667606	0.9	0.898048	0.65444	0.708772	1.15646	0.75063	0.512881	0.985755	0.728232	0.870482	1.13983	0.72	0.734694	0.701299	0.819249	0.587156	0.785714	0.345572	0.446341	0.915323	0.719577	0.668896	0.739837	0.234234	1.61049	0.917749	1.31088	0.772973	0.586572	0.456522	0.875433	0.796545	0.698297	1.1322	0.59501	0.688564	1.44776
AKT1-6	AKT1	x	0.957265	0.788427	1.25048	0.780669	0.844864	0.918288	0.952888	0.790199	1.28596	0.92963	1.10156	0.894256	0.812914	0.864322	0.712012	1.63347	1.20118	1.10039	1.02683	0.920705	0.675456	1.04197	0.906096	0.925595	0.643429	0.628502	0.83119	0.73299	0.712085	0.576017	0.813953	0.814394	0.611002	0.915956	0.5	0.830416	0.540373	0.855895	0.648822	0.630319	0.490642	0.564576	0.517287	1.04947	0.323493
AKT1-7	AKT1	x	0.966011	1.25407	1.1625	1.0625	0.981818	1.01138	0.89721	0.659249	1.1232	1.11778	1.10577	1.06425	1.12754	0.907928	0.974563	0.88412	0.992453	0.950617	0.911392	1.08727	1.02593	1.07075	1.00124	1.05774	1.16388	1.28311	1.06213	1.37705	1.09481	0.778689	0.634948	1.05391	1.02478	0.778543	0.7948	0.737903	0.872659	0.962745	0.948473	0.818297	1.08205	0.869806	0.531131	0.947681	0.981994
AKT1-8	AKT1	x	0.511243	0.823669	0.991173	1.00225	0.950231	0.961353	1.02412	0.726351	0.984898	0.846041	0.622517	0.713553	1.17228	0.845697	0.638105	0.735969	0.801598	0.884409	0.922563	0.857692	1.09144	0.753903	0.800371	0.898123	0.520325	0.758897	0.674111	0.670683	0.800922	0.878645	0.700947	0.690887	0.69559	0.81077	1.16123	1.01536	0.838663	0.626453	0.895498	0.623993	0.706288	0.443422	0.591764	0.550388	0.441582
AKT1-9	AKT1	x	1.32397	0.942731	1.1036	0.849687	1.16284	1.01616	0.744027	0.957997	0.659389	0.874839	1.03587	0.796424	1.29455	1.25845	1.01779	0.850895	0.744444	1.05934	1.06015	1.11247	1.34115	0.777273	0.893773	0.998325	0.641256	1.55828	0.58092	0.846354	0.654524	0.954265	1.28682	0.906	0.734579	0.905292	0.931669	0.956258	0.834734	0.844548	0.796569	1.41331	0.633028	0.477519	2.04729	0.555046	0.341085
AKT2-1	AKT2	x	1.50442	0.864641	0.913649	0.816273	1.03553	1.15274	0.91796	0.889734	0.973577	0.860731	1.12336	0.872694	1.06789	0.939815	0.582822	1.26667	1.06053	0.944598	1.01832	0.936556	0.661176	0.909692	0.843424	1.28465	0.87905	1.0298	0.728	1.06518	1.16696	1.09666	0.833741	0.804124	1.87826	1.21935	1.14236	0.813149	0.813793	0.663043	0.983278	0.851931	0.772824	0.542962	0.793991	0.630573	0.491773
AKT2-10	AKT2	x	0.73891	1.26458	1.10779	1.10065	1.11912	0.957123	0.933809	1.47598	1.46397	1.20486	0.873239	1.03723	1.53789	1.09141	1.43954	1.31854	1.19082	1.28299	1.27405	1.38424	1.31111	1.29136	1.53399	1.19707	1.61306	1.30071	1.03283	1.02421	1.20211	1.21519	1.32022	1.52194	1.16456	1.13412	1.49141	1.13043	1.10686	1.44932	1.50247	1.19309	1.10874	1.53822	1.09123	1.47379	2.86283
AKT2-11	AKT2	x	1.04374	1.15778	0.666016	1.13655	0.993902	0.831014	1.15177	0.902606	0.885895	0.769499	0.72549	1.00306	1.37649	1.05027	0.944715	0.84898	0.677355	0.945455	0.902534	1.21103	1.1102	1.0747	1.15878	0.982456	0.823009	0.903416	1.13433	1	0.820722	1.0475	0.757752	1.14486	0.79558	1.0163	1.15138	0.851642	0.767094	0.833333	0.930716	1.08987	0.521201	0.819868	0.870915	0.312721	0.717881
AKT2-12	AKT2	x	0.832031	0.628968	0.7	0.733981	0.831643	0.890869	0.65015	0.490099	0.859345	0.88755	0.876433	0.926934	0.771325	0.77027	0.946	0.970443	0.973615	1.03178	1.32329	0.9075	1.33073	0.960064	1.01073	0.700704	0.930459	0.758953	0.852201	0.785714	0.627072	0.959943	0.657895	0.567442	1.2398	0.951368	0.634724	0.929746	0.866667	1.07256	0.875	1.0503	0.555556	0.447205	0.597586	0.47491	0.475155
AKT2-2	AKT2	x	0.868421	1.20807	0.574194	0.716433	0.629735	0.662967	0.872356	0.910246	0.953653	0.600403	0.629938	0.559776	0.726052	0.753937	0.579817	0.743563	1.17898	0.971585	0.79422	0.746617	0.680365	0.715552	1.1487	0.794967	0.708374	0.74761	0.745112	0.818067	0.534229	0.658303	1.05193	0.584925	0.773475	0.853261	0.928346	0.936486	0.824742	0.845833	0.844893	0.654762	0.709443	0.608429	0.665923	0.712672	0.449808
AKT2-3	AKT2	x	0.780739	0.571674	0.512722	0.659016	0.712533	0.671268	0.920388	0.598882	0.607909	0.638871	0.622261	0.465128	0.549637	0.474869	0.575987	0.573582	0.4943	0.559598	0.48511	0.425945	0.4689	0.673144	0.60682	0.647523	0.478453	0.670171	0.541733	0.677519	0.701883	0.773714	0.721761	0.890488	0.869144	0.748988	0.842037	0.668428	0.570335	0.711382	0.726987	0.675645	0.739185	0.533377	0.776655	0.56489	0.346859
AKT2-4	AKT2	x	0.968523	1.62334	0.864865	1.1303	1.01188	1.38922	0.609346	0.469043	0.760479	0.7743	0.76616	0.573508	0.987864	1.29888	0.740385	0.80163	0.6775	0.660173	0.826506	0.828571	0.813472	0.945591	0.755952	1.19013	0.917625	1.00442	0.667917	0.785603	0.828697	0.753285	0.5	1.04494	0.908377	0.974603	0.972265	0.816116	1.15854	0.906344	0.912651	0.730318	0.512153	0.735197	0.837521	0.291667	0.4375
AKT2-5	AKT2	x	0.728125	1.18972	1.05782	0.810742	0.884146	1.07508	0.542529	0.546845	0.567089	0.808765	0.921776	0.640159	0.9475	0.709859	0.913174	0.811881	0.688103	0.552632	0.758514	0.952756	0.631387	1.07517	0.925843	1.00228	0.656885	0.685328	0.523504	0.803571	0.595876	0.605469	2.02459	0.53629	1.15302	0.645045	1.07911	0.909091	0.719231	0.679104	0.866667	0.635897	0.571788	0.987952	0.717949	0.607053	0.400602
AKT2-6	AKT2	x	1.52314	1.3952	1.20825	0.885434	1.11412	1.05534	1.38928	1.04462	1.2209	1.1018	0.983315	1.33441	0.987711	1.19055	1.05082	1.09801	1.29472	1.30871	1.22093	1.02976	1.33996	1.24966	0.967436	1.31818	1.19008	0.879663	0.723818	1.26061	0.885986	1.04237	1.60984	0.887814	1.04782	1.01986	0.890459	1.20537	1.22199	1.06923	1.16427	0.828	1.20339	0.856774	0.768	1.49576	0.64
AKT2-7	AKT2	x	0.70903	0.773663	0.836576	0.842105	1.07358	1.07885	0.889197	1.15702	0.641089	1.10619	0.881874	0.929897	1.20922	1.15984	1.0817	0.706061	0.810036	0.778656	0.742063	0.848708	0.681818	0.76087	1.03361	1.08883	0.723558	0.984127	1.25481	0.915138	0.560465	0.770386	1.24506	0.766197	0.550152	1.11111	0.876827	0.718137	1.13717	0.494208	0.45283	0.610989	0.669031	0.579365	1.01978	0.862884	0.71164
AKT2-8	AKT2	x	0.929766	0.881967	1.20669	0.96	0.796703	0.904459	1.38835	0.994203	1.01446	1.325	0.892009	0.962963	1.26984	0.915929	0.469613	0.879032	1.06316	1.09302	0.806452	1.20346	0.805389	1.14946	0.860241	1	1.08365	1.30249	0.63834	0.933333	0.971487	0.813765	0.493333	0.907407	1.24691	0.86514	0.820455	1.12598	0.886525	0.962687	0.835088	0.286031	0.658711	0.701717	0.283814	0.331742	1.32403
AKT2-9	AKT2	x	0.989426	0.980066	1.18537	0.891808	1.01656	1.04037	1.23024	0.835135	0.89029	1.14413	1.18652	0.830078	0.722598	0.750847	0.820059	0.855365	1.18499	1.16	0.897436	1.17426	1.13479	1.23961	0.980874	1.18447	0.815891	1.16228	0.944069	0.787819	0.888993	0.747672	1.17663	1.13235	1.16667	1.14678	0.8375	0.932752	1.09444	1.0807	0.984496	1.15845	0.80839	1.16667	0.84507	0.681406	1.24803
AKT3-1	AKT3	x	0.551587	0.614407	0.688525	1.00998	1.00384	1.05361	0.786856	1.34462	0.876603	1.14103	0.819149	0.790604	0.89404	1.01241	1.02079	1.07463	1.16168	0.718284	0.928279	0.759633	0.867308	1.00456	1.15278	1.14777	0.473062	0.8416	0.462279	1.19397	0.762255	0.880542	1.03592	1.04783	1.17568	1.14715	0.95466	0.963716	1.24757	1.19622	1.08354	1.07835	1.4	0.854396	1.33618	1.08923	0.850275
AKT3-10	AKT3	x	0.56213	1.20064	1.04173	0.96378	1.18449	0.941509	1.28972	1.30871	1.03518	1.12144	0.871357	1.28148	1.39655	1.46057	1.31369	1.26455	1.54352	1.47653	1.37143	1.3403	1.1834	1.17925	1.08387	1.55363	1.73188	1.73333	1.52933	1.22917	1.18039	1.18576	1.88486	1.27337	1.92265	1.28756	1.1589	0.941815	1.41667	1.04045	1.16499	0.842417	1.02925	1.11124	0.458531	1.01912	1.18192
AKT3-11	AKT3	x	1.63385	1.33884	1.31385	1.20619	1.30435	1.05212	1.57606	1.50524	1.4104	1.2	1.07826	1.19921	1.42123	1.49074	1.47892	1.55718	1.37809	1.3746	1.36422	1.42146	1.5461	1.19346	1.43127	1.12672	1.03618	1.24679	3.31699	1.11572	0.868825	1.33028	0.833333	1.15881	0.826816	1.10811	0.853135	1.62305	1.47419	1.51408	1.83529	1.43562	1.01319	0.770302	6.44384	1.17802	0.703016
AKT3-2	AKT3	x	0.912393	1.01464	1.21007	1.13556	1.21412	1.02548	1.1815	0.720412	1.07394	1.2678	1.28465	1.34258	1.18537	1.39223	1.62972	1.20146	1.45592	1.3	1.32104	1.27708	1.39386	1.81275	1.43034	1.07419	1.63853	1.46844	1.89262	0.983308	1.02843	0.89	1.37681	1.06203	1.05155	1.23958	1.00488	1.30131	1.19221	1.12394	1.26611	0.879406	1.02163	1.09627	0.721707	0.936772	1.41061
AKT3-3	AKT3	x	0.710526	0.814714	0.605128	0.921941	1.00928	0.98731	0.945525	1.23013	1.30538	0.93239	0.634441	1.08287	0.7	0.939394	0.906736	1.02674	1.13068	0.622951	1.16573	0.953728	0.933168	1.17166	0.798635	0.905512	0.717431	0.683891	0.870567	0.815714	1.03543	0.759587	1.66416	0.749373	1.3288	1.23958	0.90167	0.726698	1.35211	0.690667	1.10204	1.21244	0.850847	0.985801	1.74784	0.889831	1.01826
AKT3-4	AKT3	x	0.647059	0.83908	0.944954	1.25714	0.868571	0.742857	1.46746	0.874172	2.30405	1.16216	1.58156	1.1701	1.40441	1.10256	1.63063	2.12281	1.05505	1.19277	1.30201	1.5	1.3913	0.835294	1.37143	1.84459	1.17514	1.90155	0.739316	1.07471	1.05405	1.40909	4.29762	0.862903	1.15217	1.72396	1.57065	1.13043	0.828571	1.50515	2.03571	0.911111	3.01807	1.56911	2.00741	3.54819	2.13008
AKT3-5	AKT3	x	0.963351	0.786427	0.590988	1.18969	0.945122	1.05229	0.796813	0.876945	0.85452	0.741685	0.881643	0.852194	0.84898	1.01596	1.03399	1.00759	0.881905	0.875887	1.02186	0.921095	1.01701	0.892183	0.796703	0.900293	0.86326	0.275313	0.493353	0.955399	1	0.903548	1.03889	2.32794	0.862903	0.834343	0.83125	0.819517	1.0939	0.868571	1.02454	1.17638	0.829208	0.89039	1.0299	0.935644	1.40991
AKT3-6	AKT3	x	1.06154	1.69666	1.61966	1.03054	1.06576	1.14346	1.59029	1.25514	1.11887	1.42364	1.27039	1.36071	1.10513	0.980233	1.16703	1.5521	1.13514	1.23678	1.162	1.28024	1.3824	1.46247	1.41098	1.18794	1.11843	1.21718	1.51214	1.04435	1.34126	0.978378	0.835878	1.01503	1.26193	1.43978	1.09321	1.21744	1.54853	1.4886	1.40683	1.03779	1.354	1.56723	1.87334	1.59	1.77966
AKT3-7	AKT3	x	0.898551	1.02752	1.19689	0.953488	0.874372	1.51572	1.01379	0.861671	1.36364	1.12749	1.18876	1.26646	1.59722	1.65812	1.1378	0.984772	1.44019	1.53448	1.77273	1.23671	1.22083	1.23574	1.06296	1.1319	0.801527	0.84326	1.55959	1.34954	0.953297	0.979221	1.11211	1.72052	1.37281	1.21739	0.766484	0.870416	1.40571	1.25137	1.64455	1.76327	1.7235	1.06061	0.979592	3.94931	0.766667
AKT3-8	AKT3	x	0.5	0.905263	0.851064	1.19331	1.20168	0.995885	0.92	1.10256	0.795322	1.16203	0.902128	1.03266	1.05054	1.08399	1.15986	0.857759	1.20165	1.28814	1.10672	1.22642	0.608924	1.03672	0.939394	1.16225	1.30868	1.12129	0.663957	1.33333	0.591241	0.791667	0.732794	1.3964	1.19712	1.10633	0.966387	0.714549	1.78286	1.4734	1.46818	0.614583	0.991643	0.981651	1.15972	1.01114	1.263
AKT3-9	AKT3	x	0.79771	0.420601	1.03125	1.07862	1.17568	1	1.04778	1.22064	1.11504	0.684211	0.978723	1.25	1.33231	0.864023	1.43643	0.832618	1.06667	0.766393	1.1049	1.26104	1.41912	0.831435	1.1916	1.33871	0.688279	0.821346	1.08117	0.940741	1.19363	1.57102	1.06356	0.740864	1.10917	1.08197	0.965726	1.49868	1.13659	1.01282	1.91	2.43116	1.21091	0.974359	4.61232	0.792727	0.865385
ALK-1	ALK	x	0.87027	0.841432	0.89801	0.814706	0.865103	1.02865	1.41121	0.956612	1.00877	0.988462	1.10078	0.918685	1.02236	0.559367	1.12313	0.821637	0.883929	0.699725	0.76699	0.713115	0.78877	0.88806	1.02915	0.814978	0.790875	1.29457	0.95	0.930357	0.996764	0.845313	0.7151	0.994652	2.41096	1.16047	1.39718	0.770867	0.569482	0.73871	0.84984	1.13393	0.937743	0.698355	1.02679	1.06031	0.866545
ALK-10	ALK	x	1.56575	1.09091	1.0988	1.16	1.00215	1.20659	1.55794	1.11778	1.76136	0.76148	1.00298	0.951111	0.741811	1.09804	0.948276	0.8	1.36808	0.77707	1.12941	1.31475	1	1.02564	1.05678	1.31027	0.971545	0.802867	1.37774	0.958882	1.08142	1.23384	1.28354	1.91166	1.03611	0.959016	1.04124	1.2724	0.769679	0.817629	1.13245	0.674817	0.94702	1.17548	0.457213	0.865342	1.49894
ALK-2	ALK	x	1.3733	0.793664	1.20708	1.09009	1.00829	0.923583	0.929917	0.956667	0.713098	0.92552	1.02852	0.733079	1.00244	0.954932	1.21167	1.00267	0.878367	0.616364	1.16667	1.06086	0.97771	0.788032	1.09709	0.873832	0.911826	0.814222	0.741427	1.13269	1.05472	1.07063	0.908231	0.874763	0.965127	0.897971	0.930927	1.09636	1.10311	0.797015	0.967112	0.718963	1.00143	0.8101	0.884038	1.45643	0.687767
ALK-3	ALK	x	0.646825	0.933099	0.847107	0.889796	0.608527	0.776744	1.53093	0.954098	0.885246	0.878205	0.530055	1.22118	1.13575	0.96904	0.812977	1.3176	1.16596	1.5974	0.56	0.919048	0.954545	1.44958	1.16216	1.1597	1.03571	1.51429	0.752381	1.12057	0.749333	0.984576	1.84848	0.902439	1.16735	0.990625	0.776119	0.803867	1.44318	0.753769	0.855263	0.830409	1.20359	0.940594	1.08187	1.61976	0.963696
ALK-4	ALK	x	1.74606	0.764415	0.996581	1.14022	0.952715	0.985714	0.708384	0.797082	0.618454	0.841885	0.687366	0.825364	0.85205	0.935725	0.934164	0.869919	0.886097	1.74904	0.809129	0.578947	0.679727	1.10169	1.41586	1.03404	0.74152	0.744898	0.858779	0.846899	0.994434	0.950091	2.65736	1.00489	0.807496	0.927975	1.18089	0.810838	0.789022	0.77027	1.04527	1.40436	1.01472	0.732207	1.52906	1.13129	0.892642
ALK-5	ALK	x	0.7425	1.43829	1.14286	0.986842	0.928977	1.07062	1.27764	1.23238	0.98927	1.16387	1.02737	1.00778	0.769036	0.760204	1.0566	1.04971	0.800595	1.07692	1.17004	1.15506	1.0456	1.30878	1.24221	1.03133	1.22056	1.3037	1.28899	0.911392	0.927176	1.37823	1.13611	0.818182	1.58649	1.11647	1.12936	0.938998	1.27273	1.04808	1.03495	1.27506	0.395722	0.774135	0.923077	0.365419	1.18215
ALK-6	ALK	x	0.473881	1.29615	0.830882	1.04196	1.13028	1.03896	0.856338	0.912409	1.02556	0.945378	1.12553	0.879121	1.27397	0.755034	0.854342	1.55869	0.973451	1.41538	1.14683	0.873077	0.845283	0.848315	0.952632	1.22821	0.699571	1.19685	0.954407	0.666667	0.851852	1.04762	0.827586	0.347682	1.06391	0.810247	0.803097	0.828512	0.767068	0.948276	0.886463	1.35501	1.54717	1.86391	0.528455	1.50314	1.76923
ALK-7	ALK	x	1.37666	1.0665	1.58371	1.12736	1.06931	1.08102	1.25283	0.839147	0.935421	1.11457	1.34258	0.97048	1.02079	1.16206	1.36702	1.27083	0.971564	0.794737	1.15844	1.30601	1.02302	1.33945	1.09966	1.07912	0.789931	0.717391	1.38773	1.05015	1.3137	1.00775	0.836323	0.800399	0.805405	0.997183	1.00639	1.08865	1.13636	1.56289	1.07902	1.28487	1.01002	1.35816	1.52652	1.20033	0.785461
ALK-8	ALK	x	1.1544	0.857791	0.655763	0.969965	1.05925	0.943973	0.935366	0.87069	1.1125	0.943613	1.08807	1.15469	0.955626	0.926948	1.08011	0.784348	1.01634	0.697712	0.916814	0.938166	0.790323	1.05634	0.831507	0.68348	1.86941	0.773504	1.19055	0.911067	1.00787	0.778875	0.903328	1.36378	1.04412	0.845842	1.2451	0.944934	0.996337	0.880672	0.813406	0.977752	0.716019	0.887887	0.996487	0.966019	0.898196
ALK-9	ALK	x	1.01037	0.839318	0.952333	0.915825	0.924942	0.993048	0.825843	0.96336	1.03107	1.04446	1.33497	1.00153	1.09733	0.875291	0.914697	0.931464	0.982418	1.27667	1.11237	1.17089	1.11477	0.944251	0.92968	0.916819	0.745814	0.568814	0.800174	0.986266	1.13285	0.919708	1.40038	1.70056	1.25593	0.955123	0.877423	0.887673	1.13341	0.965978	1.11218	0.8599	1.26066	1.06601	0.852037	1.16904	1.00978
ALPK1-1	ALPK1	x	1.23445	1.21979	1.43195	1.3046	1.13855	1.10991	0.990705	1.30138	1.29267	1.10783	1.1337	1.17969	1.24022	1.3151	1.20878	0.985728	1.19067	1.1315	1.55324	0.978142	1.38889	1.14611	1.2032	1.25775	1.43094	1.3102	0.900971	0.89077	1.23109	1.22886	0.93211	0.666008	1.25135	1.07824	1.18947	1.35833	1.06883	1.19465	0.959263	1.1057	1.14491	0.976307	1.20041	1.09023	0.749826
ALPK1-10	ALPK1	x	1.01175	0.924009	1.24619	1.11275	1.13409	1.16777	1.0759	1.33925	0.977077	1.22615	1.08019	1.05877	0.843891	1.04408	1.03409	0.987893	0.840741	1.06431	0.935837	1.05308	1.28136	1.023	0.968032	1.15907	1.48061	1.18387	1.04212	0.951694	1.0831	1.08309	1.41383	0.626104	1.1241	1.09515	0.905049	0.838957	1.04749	1.32425	1.11728	1.26851	1.08178	1.07206	1.31579	1.14033	1.07611
ALPK1-2	ALPK1	x	1.13855	1.35	0.695652	0.806604	1.133	1.07303	1.67773	0.880184	1.9932	1.3663	1.17669	1.43023	1.39151	1.26994	1.07246	1.16	1.15244	1.4186	0.895197	1.06599	1.16568	0.834559	1.31799	1.06349	1.55556	1.32267	0.742754	1.32157	0.599251	0.863787	1.14	2.02381	1.19266	1.09747	0.993994	1.27935	1.42581	0.860215	1.21714	1.97273	1.00364	0.918103	1.62727	1.12	0.474138
ALPK1-3	ALPK1	x	0.921512	1.12126	0.676991	1.19817	1.28705	1.10829	1.08602	1.10976	0.980723	1.09132	0.911049	0.858664	0.887172	0.941807	1.14123	0.896445	0.941842	1.02742	1.01812	1.1506	1.1768	1.08382	1.10082	1.1257	1.42582	1.50127	1.15926	1.06075	1.056	1.13579	1.08638	0.820189	0.863905	1.19266	1.13607	0.726108	0.893761	0.988593	0.93083	1.31224	1.40828	0.618159	1.46976	1.70582	0.486318
ALPK1-4	ALPK1	x	1.21448	1.12159	1.28736	1.20047	1.01493	0.969101	1.57021	1.15449	1.16189	0.848168	0.86385	1.12329	0.875847	1.22444	0.878109	0.824658	1.01136	0.810474	0.796345	0.806005	1.25419	0.858716	0.828185	1.16505	0.647388	0.558091	1.1855	0.757576	0.872483	0.987567	1.25172	0.791878	0.927711	1.04128	1.29567	0.695752	1.12536	0.771505	0.896552	0.821429	1.06765	1.32438	0.711039	1.13953	2.18595
ALPK1-5	ALPK1	x	1.48291	0.809524	1.43299	1.07947	1.16271	0.840782	1.00562	1.16459	1.50292	1.02385	1.4095	0.660455	0.75	1.17563	0.948718	1.23137	1.28968	0.944444	1.3625	1.0427	1.26482	1.05149	1.16807	1.09254	0.711694	0.495885	1.92558	1.53978	1	0.874486	1.43917	1.35361	0.671827	1.15945	1.21307	1.09698	2.2	1.09453	1.31076	1.39481	1.39118	1.24784	1.76623	1.39706	1.21326
ALPK1-6	ALPK1	x	1.30564	1.06284	1.28571	1.00504	1.23704	1.10474	1.81683	1.43561	0.891122	1.19481	1.29174	1.36627	1.0801	1.1036	1.27978	1.08629	1.19355	1.54286	1.04871	1.08357	1.5137	1.19663	1.23679	1.46767	0.681592	0.923395	0.502058	1.04934	1.30769	1.21255	0.672646	1.6	0.88785	1.10828	0.976636	1.16464	1.18261	1.36176	0.934718	1.44706	1.23818	1.02683	1.42353	1.07432	1.25045
ALPK1-7	ALPK1	x	1.52317	1.64091	1.03069	1.34253	1.10586	1.13426	1.43889	1.10845	1.55351	0.988386	1.4209	1.44752	1.65814	1.33333	1.6825	1.11213	1.1741	1.21444	1.38482	1.67069	1.25758	1.48364	1.21519	1.1511	1.80043	1.09514	2.1991	0.893671	1.19368	0.931889	1.16559	1.88337	1.19512	1.28348	1.08597	1.15873	1.38539	1.34659	1.51969	0.569343	1.6569	1.13889	0.362044	1.84828	0.845486
ALPK1-8	ALPK1	x	0.684796	1.02439	0.884864	0.886792	1.02726	0.964064	0.865502	0.996327	0.650807	0.648855	0.994966	0.686416	0.769306	0.894046	1.01995	0.768322	0.746684	0.612702	0.709988	0.74622	0.988189	0.889934	0.94186	0.863722	0.502664	0.774742	1.07506	0.789437	0.898233	1.00146	0.960407	1.19277	0.890398	0.938686	0.845027	0.65758	0.872935	0.914842	0.902632	0.958403	0.607335	0.793103	0.782862	0.724508	1.23755
ALPK1-9	ALPK1	x	1.40991	1.21173	1.9102	1.14523	1.09121	1.03934	1.2475	2.18728	1.34286	1.46939	1.10816	1.24169	1.82328	0.904437	1.49686	1.22041	1.28679	0.839416	1.15655	1.26829	1.00917	1.03581	1.16418	1.40779	1.06433	0.505721	1.37037	0.853814	1.00716	0.986143	2.76056	1.32927	0.66065	1.20647	1	0.878151	1.27876	1.14912	1.49027	1.49856	0.685792	0.648148	2.14986	0.797814	0.697531
ALPK2-1	ALPK2	x	1.23834	1.01463	0.913242	0.903226	0.781659	0.735294	1.41844	0.991561	1.17966	0.701333	0.727891	0.987013	1.46961	0.731225	1.38579	1.15607	1.28652	0.942408	0.754098	0.717791	0.78125	0.911661	0.607914	0.522267	2.06936	0.584615	0.895044	0.628726	1.04087	0.924242	0.898678	0.910448	1	1.03185	1.28625	0.800512	0.576037	1.31818	0.927835	0.941379	1.3557	1.34409	0.555172	1.41275	1.07527
ALPK2-10	ALPK2	x	0.868421	1.27913	1.01075	0.980447	0.875	1.14627	1.1467	1.21296	1.15282	1.08459	1.18857	1.12939	0.736585	1.70569	0.892128	0.932749	1.22184	1.15318	0.932258	1.39419	0.851744	1.46787	1.15925	0.927273	0.938914	1.4689	1.16018	1.31781	1.48932	1.22719	0.904908	0.751613	1.4875	1.33766	0.949749	1.46835	1.01003	1.47569	1.15411	1.36641	1.16545	0.920354	1.17303	1.58394	1.36947
ALPK2-2	ALPK2	x	#DIV/0!	#DIV/0!	1	0.65	1.23529	0.375	0.25	0.5	0.5	2.5	1.69231	0.548387	1.27273	32	3	0	#DIV/0!	0	0.766667	0.761905	1.57143	0.857143	0.62963	0.941176	0.75	0.833333	1.08333	0	0	#DIV/0!	1	#DIV/0!	2	0.21875	0.222222	0.882353	0	#DIV/0!	0	#DIV/0!	0	2	#DIV/0!	1	0
ALPK2-3	ALPK2	x	0.917981	1.97368	1.06207	1.0381	0.967532	1.00331	1.87069	1.02586	0.764228	1.36989	1.39905	1.78325	1.21726	1.21495	1.04734	1.40226	1.09964	0.971831	1.27358	1.23529	1.69099	1.24868	1.46113	1.50613	1.23734	0.695538	1.07789	1.35	1.04526	1.26813	1.38951	0.706081	0.69258	1.29167	1.0155	0.874251	1.87931	1.90868	1.43515	1.78016	1.76282	1.56707	2.49866	1.89103	0.914634
ALPK2-4	ALPK2	x	1.40637	1.00358	0.885017	1.25085	1.09594	1.20339	1.61538	0.97343	1.3792	1.68229	1.63043	1.37101	1.5529	1.14286	1.42522	1.40496	0.893281	1.59574	2.13876	1.63281	1.644	0.994819	1.14986	1.20941	1.19907	1.15695	1.80189	1.11196	0.963387	1.00246	1.68705	0.62782	1.39636	0.934043	1.12016	1.32644	1.10917	2.00398	1.53171	0.568928	0.60443	0.795666	0.389497	0.613924	0.975232
ALPK2-5	ALPK2	x	1.72222	1.31053	0.822727	1.34359	0.964286	1.425	0.784615	0.990654	0.756303	0.9	0.939759	1.35461	1.43689	1.07011	1.07175	1.05556	0.989071	1.10405	1.56452	1.16477	0.942222	1.37079	1.02974	0.935606	1.18182	0.923754	1.50158	0.76257	0.642105	1.13086	0.351351	1.21633	1.9434	1.73704	0.84466	0.986755	1.5989	1.56938	1.22414	1.24535	0.587361	0.750779	2.05948	0.587361	0.943925
ALPK2-6	ALPK2	x	1.68173	1.51852	1.38277	1.08969	1.14604	1.21023	1.71675	1.57785	1.43902	1.74332	1.6256	1.39799	1.51429	1.23529	1.34677	1.75299	1.37823	1.48431	1.59653	1.21591	1.13026	1.61189	1.18222	1.36	1.33385	1.8413	1.60943	1.00587	1.43421	1.12128	1.43149	1.23913	1.29575	1.48189	1.07296	1.34011	1.58621	1.63425	1.5368	0.982503	1.28116	1.41301	0.687752	1.20435	1.87443
ALPK2-7	ALPK2	x	0.70412	0.818565	1.49412	1.43195	1.02804	0.945312	1.1199	1.08661	1.9875	1.1403	1.01216	1.10694	1.68872	0.877119	0.979592	1.63761	0.933852	2.29787	0.989796	0.790262	0.885522	0.863481	0.865724	0.908537	2.94561	0.673333	0.718412	1.05805	0.949495	1.15403	0.845714	1.33178	0.78903	1.27302	1.35312	0.886305	1.18433	1.64186	1.75	1.44948	0.926471	0.632022	1.36934	0.820588	1.08989
ALPK2-8	ALPK2	x	1.02972	0.723729	1.69128	0.890411	1.18805	1.07361	0.824773	1.19389	0.904826	1.16005	0.995931	1.25732	1.2028	1.09899	0.933333	1.06387	1.30411	1.08291	0.898596	0.998353	0.915521	0.982927	0.885189	1.09875	1.34673	1.12118	1.58824	1.05192	1.17386	1.21313	1.63405	0.773616	1.12322	0.953419	0.965412	0.98011	1.35335	0.765166	0.933579	1.33167	1.15407	1.02937	1.18579	0.912981	1.17002
ALPK2-9	ALPK2	x	1.47807	1.21652	1.42433	1.02283	1.2132	1.1664	1.3767	1.12269	1.09846	1.12791	1.18387	1.47679	1.47049	1.20813	1.19453	1.16374	1.16787	1.2625	0.94164	1.19962	1.31724	1.39814	1.38247	1.45607	0.812354	1.15517	2.0223	1.02939	1.01605	1.19929	0.658247	1.44812	1.35761	1.16531	1.06598	1.27253	1.21635	1.30464	1.10966	1.0339	1.33029	0.897119	1.02477	1.22898	1.03292
ALPK3-1	ALPK3	x	1.15625	1.17868	2.26712	1.03736	1.10932	1.05263	1.52672	1.2096	1.2399	1.12151	0.850435	1.42387	1.33623	1.29095	1.13506	0.819608	1.00697	1.21591	1.34286	1.45968	1	1.57403	1.33501	1.3801	2.05341	1.16667	0.808554	1.25764	1.34337	1.09363	1.31148	0.53	0.684211	0.882883	1.23664	1.52575	1.0202	1.15845	1.81172	1.12211	1.02432	0.496278	2.06931	1.25532	0.220844
ALPK3-10	ALPK3	x	0.674242	1.07767	0.921348	1.13393	0.839002	0.930649	0.543771	0.660348	0.637821	0.81351	0.664748	0.719355	1.1986	0.776699	0.906054	0.799511	0.763959	0.725686	0.634845	0.690104	0.787172	0.846011	0.880995	1.0794	1.60082	0.99292	1.09658	1.11947	0.790503	1.09664	1.36741	0.930788	1.05301	1.02659	0.853437	1.19763	0.955959	0.825	0.881402	0.758099	0.507937	1.03089	0.712743	0.530864	0.793436
ALPK3-2	ALPK3	x	1.28021	1.71807	2.24528	1.06211	1.055	1.23988	0.980392	1.31456	1.41286	1.41209	1.35522	1.32313	0.879493	1.9209	1.51807	1.7293	1.5977	1.69077	1.67845	1.62132	1.344	1.21739	1.58293	1.5	1.60739	1.38993	1.89462	0.774603	1.07448	0.995231	1.5475	1.28011	1.038	0.886861	0.854812	1.30906	1.48515	1.26065	1.56932	0.809917	1.40764	1.65447	0.927686	1.66454	1.65447
ALPK3-3	ALPK3	x	0.917333	1.43276	0.900826	0.997245	1.11357	1.31615	1.38267	1.73544	1.48409	1.35156	1.62233	1.43723	1.13761	1.21558	1.3869	1.47804	1.40657	1.43034	1.22462	1.03846	1.39039	1.42466	1.39037	0.864583	1.53448	0.822404	1.35934	1.26437	1.30526	1.23103	3.22364	1.11276	0.77673	1.49633	1.4881	1.27536	1.41275	1.32249	1.9959	0.984064	0.987097	0.70696	0.946215	1.31398	1.14835
ALPK3-4	ALPK3	x	0.608309	0.581538	0.812121	0.867816	0.777778	0.940741	0.888337	0.933824	0.928375	0.642994	0.939347	0.95	0.914508	0.860215	0.788804	0.855596	0.772308	0.593583	0.991892	0.798701	0.752066	0.701461	0.847007	0.903756	0.682353	0.583333	0.864583	1.01953	1.06721	0.837128	1.38462	1.08657	0.651652	1.34332	1.02703	0.934477	1.28421	1.02545	1.15152	1.94536	0.848131	0.830688	4.00546	0.803738	0.899471
ALPK3-5	ALPK3	x	0.937304	1.46809	1.35014	1.05248	1.13554	1.13128	1.03723	1.11504	1.42687	0.842881	1.13524	0.786713	1.60759	1.30211	1.1726	1.28723	1.01718	1.71591	1.28464	1.13534	1.15436	1.6206	1.28689	0.802817	2.02326	1.56264	0.840909	1.06286	0.965049	1.04621	1.26453	1.80822	1.20968	0.981132	1.17635	1.10846	0.97193	1.48727	1.15679	1.30601	0.4814	1.535	0.964481	0.857768	2.2975
ALPK3-6	ALPK3	x	1.44411	1.01961	0.875	1.10309	1.25667	1.18959	1.36136	1.08717	0.96962	0.891304	0.843687	0.970588	1.18855	0.609551	1.06855	0.92278	0.963899	0.867692	0.850909	1.09677	1.12766	1.08964	0.699164	0.775561	0.441304	0.883648	0.463104	0.815742	0.717172	1.03448	0.489028	1.22472	0.580128	1.06299	0.886574	0.813187	1.10853	1.14134	0.919298	0.928261	1.60533	1.40421	0.956522	1.79177	1.41822
ALPK3-7	ALPK3	x	0.477477	0.604027	0.25	0.90566	1.15827	0.986577	0.684783	0.637427	1.04487	1.15116	0.521368	0.632432	0.766082	0.915493	0.674157	0.430556	0.92029	0.878505	1.19231	1.10968	0.80137	0.969565	0.772487	1.50888	0.0955414	0.946108	0.677778	1.88482	1.02439	0.903346	0.567073	0.781955	0.87037	1.59091	0.725979	1.23786	1.07971	1.04545	0.977444	0.814433	0.73057	1.72917	0.396907	0.751295	1.92361
ALPK3-8	ALPK3	x	1.20283	1.49263	0.839833	1.04805	1.03969	1.0781	1.00569	1.11392	1.24167	0.833929	0.880998	0.980822	1.05099	1.75676	1.06013	1.01009	1.064	1.04589	1.09683	0.913978	0.885217	1.04116	1.11125	0.945042	0.840796	0.903509	1.0625	0.95636	1.12132	1.04463	0.942187	1.17676	0.975291	1.03946	0.954054	0.854626	1.22697	0.913941	1.0992	0.933489	1.22139	1.49628	0.834306	0.786096	1.49007
ALPK3-9	ALPK3	x	1.332	1.09131	1.28052	1.1511	1.16978	1.14261	1.36543	1.32809	1.60116	1.11314	0.959471	1.53001	1.28529	1.77376	1.35626	1.28497	1.17221	0.91933	1.75189	1.35103	1.39672	1.10883	1.56431	1.42857	1.62854	1.93642	1.62074	1.43851	1.09915	1.14396	1.10101	1.33065	1.04052	1.26693	1.16938	1.08086	1.37611	1.64583	1.57756	1.63326	1.70352	1.50441	1.89066	1.07286	1.07818
AMHR2-1	AMHR2	x	1.26136	0.710145	1.53277	1.06822	0.963068	1.21154	1.31522	1.07382	1.36386	1.15596	1.39451	1.19223	1.35169	1.25079	1.48109	1.0506	1.06884	1.20578	1.6328	1.33755	1.49444	1.52041	1.75664	1.25849	1.5801	2.47727	1.34009	1.1038	0.898089	1.29773	1.17799	2.12924	1.19492	1.14718	1.09323	1.24503	1.55993	1.48696	1.43494	2.00587	1.20681	1.5743	3.52863	1.26156	2.26104
AMHR2-10	AMHR2	x	0.810865	1.13146	0.720841	1.17135	1.16195	0.977477	0.842735	0.910806	0.961715	0.613312	0.996473	0.586031	1.37283	0.717647	1.14989	0.922518	0.876485	0.674528	0.960836	0.91	0.666667	0.948276	0.860963	0.953846	0.470449	0.518576	0.537341	0.890357	0.939803	0.666283	1.0641	0.970745	0.77439	0.871401	0.822289	0.803883	0.766332	0.732468	0.821596	0.794366	0.769643	0.770578	0.643662	0.7	0.777583
AMHR2-11	AMHR2	x	1.00488	1.33784	1.50215	0.982677	1.14845	0.923741	1.12265	1.27923	1.28388	1.17598	0.989141	1.20793	1.24823	1.0279	0.833094	1.16493	1.41918	0.936416	1.14941	1.44107	1.48193	1.14849	1.02756	1.35644	1.68209	0.950197	0.977183	1.10802	1.09792	1.16066	1.81719	0.680657	0.924731	1.05982	1.24809	0.844749	1.23958	1.20626	1.15285	1.19975	1.0246	0.892601	1.21608	0.599016	0.97852
AMHR2-12	AMHR2	x	1.11905	0.766839	0.384615	0.833333	0.98773	1.03268	1.08029	0.841584	0.839858	0.575107	0.715517	0.781481	1.19497	0.408333	0.75	0.216749	0.760163	0.707207	0.737179	0.429448	0.476744	0.529851	0.85	0.823256	0.322485	0.573077	0.512821	0.794613	0.728814	1.16717	0.625	0.47449	0.945378	1.36747	0.276968	0.713725	0.85	0.725118	0.610256	0.88255	0.805825	0.564014	0.54698	0.514563	0.608997
AMHR2-13	AMHR2	x	1.06718	0.862613	0.860892	1.15171	1.02613	0.842324	1.31526	1.22828	0.974724	1.03226	1.04598	0.817416	1.09113	1.12331	1.24792	1.15711	1.04668	0.902748	1.03812	1.09067	1.21253	1.25408	0.94971	1.20727	0.733021	1.11825	0.630339	0.850067	0.911208	1.03956	0.906639	2.22676	0.891544	1.3438	1.0252	0.807547	1.00513	1.15489	1.15927	1.20038	1.1875	1.35025	1.14745	1.11378	1.83249
AMHR2-14	AMHR2	x	1.77817	1.62414	2.03374	1.04545	0.887417	1.39357	1.47815	1.39216	1.4843	0.972332	1.54688	1.19097	1.12	1.25177	1.23179	0.893617	1.62712	1.65049	1.064	1.42529	0.626543	1.38006	1.52975	1.19789	0.904177	1.31116	1.25528	1.37214	1.17279	1.09839	0.832817	1.09226	2.13656	1.48492	1.30412	0.889583	1.28254	1.21875	1.24188	1.04322	1.20721	1.29167	1.14342	1.07658	1.05093
AMHR2-2	AMHR2	x	1.29424	0.732794	0.735714	1.09024	1.04684	1.13061	1.21541	0.720827	1.19799	0.980595	1.04745	1.09647	1.41615	1.01695	1.13204	1.0261	1.19432	0.915367	0.993304	1.00716	0.816116	1.18426	1.042	1.2734	1.08554	0.851689	0.765528	1.18968	1.15586	1.13429	1.95851	0.846868	1.5617	0.990113	1.20054	0.838663	1.14396	0.908665	1.05928	1.39881	1.07564	0.994269	1.01984	0.730711	1.24642
AMHR2-3	AMHR2	x	1.03195	1.25581	2.16518	0.898551	0.826979	0.958333	0.877108	0.601367	1.23664	0.919315	0.884434	1.09501	0.981413	1.11397	0.701183	0.624454	1.66216	0.543253	1.1036	0.740157	0.568421	0.832891	0.862857	1.00988	1.07219	0.862559	0.87037	0.874396	0.817352	1.08204	1.00461	0.659933	0.758503	0.818182	0.469697	0.745182	0.690554	0.909091	0.593583	1.20128	0.8	0.943548	1.16294	1.23896	0.365591
AMHR2-4	AMHR2	x	0.700787	0.62782	0.462366	0.815789	0.916667	0.956989	0.873494	0.824219	0.545455	0.896024	0.8933	0.766578	0.729825	0.661238	0.895833	0.656652	0.551181	1.324	0.63913	0.547486	0.61828	0.986885	0.38535	0.973485	0.845426	0.966495	0.386364	0.994709	0.829457	1.06377	1.28571	1.47656	1.31148	0.696056	0.598309	0.569519	0.737557	0.835556	1.36	0.49	1.09968	1.10769	0.263333	1.41479	0.957692
AMHR2-5	AMHR2	x	0.624146	1.14286	0.723926	0.851598	1.09763	1.09972	1.09091	0.895795	1.17376	1.16883	0.99239	0.910097	1.14014	1.52355	1.0445	0.931624	0.88412	0.779292	0.933673	1.0642	1.23362	0.903945	1.12826	0.981413	0.644094	0.585177	0.977273	1.21343	1.2035	1.27517	0.867168	1.28871	1.26558	0.921678	0.876812	1.32993	0.919643	1.19364	1.00551	0.659609	1.06132	1.00812	0.62215	1.31447	0.644481
AMHR2-6	AMHR2	x	1.01821	1.47135	1.33894	0.979943	0.879589	1.13752	1.01478	1.20715	1.15532	1.24027	1.06647	0.874245	1.08092	0.825293	1.22155	1.00444	1.13214	0.756338	1.09032	0.885246	0.957643	1.09704	1.02061	1.13126	0.801471	1.03386	1.10943	0.968541	0.867788	0.950045	1.30909	1.22128	0.994819	0.935025	1.06102	1.09342	0.9806	0.971108	0.917667	1.08342	1.41806	1.11954	1.23402	1.13712	1.10083
AMHR2-7	AMHR2	x	0.90146	1.62705	1.73267	1.6595	1.00904	1.08357	1.48243	1.45483	1.57683	1.375	1.48524	1.62009	1.22581	1.38629	0.946176	1.85238	1.33047	1.65038	1.24498	1.24503	1.38276	1.73046	1.58734	1.04925	1.52311	2.44764	1.73795	1.45418	1.30377	1.07576	1.00585	0.354938	0.755224	1.19569	2.29779	0.98913	1.416	1.3551	1.64629	1.37654	1.04965	2.2358	1.2716	1.61702	1.40057
AMHR2-8	AMHR2	x	0.791123	0.866983	1.33133	0.753659	0.901299	0.772727	0.698824	1.22245	0.931857	0.910112	0.729428	0.717949	1.0686	0.657143	0.5311	0.556391	0.67581	1.02703	0.605195	0.651715	0.407035	0.745353	1.09756	0.568345	0.975904	0.420981	1.26844	0.99005	0.906498	1.16297	1.74677	0.731544	1.6028	0.820205	0.640379	0.781124	0.745283	0.752089	0.882883	0.690671	0.898649	0.947653	0.808511	1.18468	1.05596
AMHR2-9	AMHR2	x	0.88671	0.874214	1.20789	1.16476	1.27594	1.11358	1.12982	0.974403	0.854815	1.01592	1.14774	1.14586	1.73193	1.22517	1.39467	0.970588	0.925311	0.957173	1.31183	1.33753	1.04405	0.951562	0.841762	1.16911	1.51478	0.776596	0.972141	1.10891	1.02236	1.1601	0.5	0.875283	1.16839	0.968116	1.07264	1.08977	1.37292	1.24344	1.31084	0.859223	1.37186	1.309	1.26214	1.49749	1.59593
ANKK1-1	ANKK1	x	1.36801	1.21622	1.65396	1.16011	1.01181	1.12248	1.37791	0.911597	1.28298	1.21074	1.34105	1.17406	1.34875	1.5155	0.896797	1.32705	1.12334	1.15207	0.988636	1.40989	1.43831	1.4267	1.22078	1.1188	1.39229	1.28058	1.18733	1.06818	0.995519	1.1107	1.28851	1.15802	1.11453	1.17202	1.26836	0.852075	1.24534	1.28407	1.2791	1.15536	1.01067	1.0439	1.62242	1.07953	1.26514
ANKK1-10	ANKK1	x	1.69643	2.8156	0.927835	0.890625	0.78	1.01775	0.81982	0.615741	1.88701	0.83526	0.92607	0.677966	1.03182	2.26429	0.979021	1.875	1.28571	0.543011	0.924855	1.04605	0.705202	0.911348	0.973077	1.1004	0.593939	0.901869	0.609375	1.16279	1.06081	0.543478	2.20606	0.447853	0.531579	1.15101	0.84058	1.44643	0.620482	0.754717	0.579487	1.65854	0.665441	0.961686	0.955285	1.09559	0.988506
ANKK1-2	ANKK1	x	1.18407	1.70663	0.737589	1.27869	0.850123	0.988636	1.49184	1.39464	0.911985	0.891738	1.25238	1.05181	1.57276	1.15942	0.984375	0.866505	0.948849	1.14436	0.874359	1.18391	1.1165	1.10429	1.09717	1.09375	1.08247	0.692177	1.0504	1.18069	1.02006	1.53542	1.28809	2.37273	1.04306	0.896825	1.2766	1.42612	1.22659	1.45429	1.1462	0.560317	1.46018	1.32065	0.479365	1.48496	1.36232
ANKK1-3	ANKK1	x	1.55181	0.968293	1.1895	1.05251	1.09832	1.28889	1.23077	1.13984	1.39489	1.24046	1.11429	1.2287	1.3783	1.03899	0.931264	1.37352	1.24021	1	1.50667	1.28065	1.29771	1.47401	1.11395	0.913725	1.01438	1.04563	1.74313	1.04366	1.02736	0.972368	0.742574	1.04401	1.29202	0.921541	0.986706	0.991411	0.986143	0.979167	1.41085	0.811502	1.37004	1.19431	0.884984	1.88628	1.39336
ANKK1-4	ANKK1	x	1.50273	1.18895	1.83102	1.27011	1.01174	0.946154	1.14725	1.55402	1.62442	1.34936	1.65018	1.51803	1.19878	1.12269	1.07547	1.1186	1.27568	1.35977	0.9975	1.30588	0.80622	1.12195	1.44348	1.51748	1.87526	2.12043	1.20382	1.22742	0.957143	1.33279	0.874172	1.70588	1.60294	1.21045	0.900592	1.46967	1.06336	1.27195	1.38	1.37352	1.05091	1.36099	0.893617	1.23273	1.51794
ANKK1-5	ANKK1	x	1.213	1.0795	1.34122	1.3133	0.976562	1.249	1.65176	1.32804	1.41593	1.01144	0.962353	1.38194	1.04688	1.10757	1.22517	0.940767	0.713816	0.867797	1.24454	1.17969	0.896861	1.15302	1.13473	0.987302	1.01639	1.16092	0.966574	1.05531	0.973995	1.15057	1.19847	1.52083	1.05387	1.22659	1.07542	0.742794	0.907563	0.969582	0.978648	0.888337	1.11446	1.51397	1.29032	1.5	1.54469
ANKK1-6	ANKK1	x	0.986175	1.07287	0.346667	1.20172	1.12734	0.889313	0.81203	1.3875	0.711864	0.889189	1.06818	0.796992	1.66953	1.2007	1.41534	1.45098	0.854251	1.62264	0.811881	0.959854	1.02667	1.45455	1.14826	1.15309	1.47458	0.558824	1.32714	1.59298	1.30387	0.882184	0.684932	1.35294	0.372549	0.931937	1.17742	0.911765	1.15278	0.748634	1.16738	0.701031	1.03093	1.15924	0.652921	1.35395	0.859873
ANKK1-7	ANKK1	x	1.31268	1.16519	0.549505	0.929664	0.926752	0.883234	1.23885	1.68205	1.16344	1.24112	0.964045	0.835766	0.974843	0.878594	0.977848	0.760943	0.739583	0.579104	1.64851	0.946128	1.6087	0.811258	1.13043	1.07251	1.22796	0.828986	0.688787	1.25941	1.12979	0.797323	1.30313	0.387543	1.08202	0.982684	1.42123	0.88172	0.993103	0.966777	1.21245	1.55272	0.944724	1.23967	2.05112	0.459799	0.732782
ANKK1-8	ANKK1	x	1.19084	1.19084	1.39937	0.821192	1.26277	0.817416	0.816667	1.1516	1.21908	0.955197	1.369	0.989813	1.2809	1.67331	1.00573	1.01163	1.20522	0.568807	1.38492	1.18317	1.07407	1.14663	1.39344	1.41892	0.572156	0.790043	0.544086	0.884937	1.09237	0.849722	0.9	1.7619	1	1.05078	1.19091	1.02024	1.22083	1.63393	1.27876	1.07038	1.33846	1.13086	1.58944	1.75824	1.21728
ANKK1-9	ANKK1	x	1.37351	1.30369	1.05296	1.06997	1.07681	0.98505	1.14	1.38032	1.0578	0.882456	0.979592	0.981627	1.22061	0.992481	0.974563	1.21109	1.0094	0.888179	1.21597	1.08964	1.04921	0.973563	0.881499	1.1285	1.21212	0.855874	0.778434	0.920204	1.27273	1.08821	1.25758	1.78307	1.21333	1.07157	0.819536	1.02089	1.09158	1.05324	0.847518	1.14484	0.883117	0.976325	1.4102	1.3355	0.904171
ARAF-1	ARAF	x	0.875	1.38243	1.45566	1.03904	1.33922	1.00585	1.22774	1.8198	1.00617	1.09108	1.23506	1.10256	0.869565	1.36134	1.43713	0.851662	1.12034	1.05362	1.58447	1.22414	0.770677	0.987047	1.38341	1.31469	1.60091	1.61649	1.54783	1.10806	0.947183	1.06076	1.69461	0.977099	1.97866	1.25164	1.24745	1.3922	1.19435	1.62034	1.47557	1.2302	1.41545	2.035	1.11386	1.25678	1.78
ARAF-10	ARAF	x	0.764706	1.02098	0.934498	1.2849	1.00943	0.878723	0.645212	1.27766	0.784127	0.855282	0.988456	1.0262	0.96114	1.21099	1.27887	1.07466	0.869266	1.01064	0.97201	1.20699	1.37798	1.03421	1.43116	1.18235	1.18676	0.320427	1.20907	0.835928	1.0927	1.20052	0.932715	0.779886	1.33252	0.87642	0.896	1.05958	0.968421	1.2522	1.21411	1.09663	1.34783	0.599303	1.32135	1.31677	0.632404
ARAF-11	ARAF	x	1.44691	1.33977	1.23913	0.932024	1.09012	1.22804	1.51429	1.10153	1.27421	1.29167	1.12032	1.19032	1.53695	1.07659	1.20632	1.09286	0.86645	0.797697	1.27273	1.50989	1.29301	1.35139	1.35338	1.37411	1.36059	0.916667	1.72333	1.02149	0.922797	1.17763	1.34439	0.804173	0.605634	0.872856	0.917836	0.955347	1.26504	1.53618	0.902896	0.988067	0.746251	0.832768	1.3222	0.943483	0.914124
ARAF-12	ARAF	x	1.24776	0.794918	1.20418	1.0519	1.12791	0.964218	0.95515	0.670262	0.796374	1.69288	1.05801	1.09125	1.13359	0.720539	0.863487	0.795053	1.36571	0.724508	1.21008	1.34335	1.02683	1.24887	1.21083	1.08936	1.10324	1.51445	1.37866	0.85316	0.970621	0.962424	1.49901	0.788066	1.84201	1.05882	1.17372	1.06892	1.01856	1.51364	0.852156	0.693196	1.43863	0.807487	0.699615	1.33061	0.768717
ARAF-13	ARAF	x	0.72379	0.717778	0.83693	1.25622	0.926087	1.17403	1.13128	1.33459	0.960818	1.19947	0.969822	1.08427	1.02268	1.115	0.885947	1.33152	1.11628	1.08101	1.47198	1.21196	1.36022	1.09504	0.926991	1.3659	0.9328	1.19968	1.13367	0.890561	1.23029	1.00812	1.01535	1.18372	0.689583	1.07803	0.877301	1.08333	1.06098	1.10422	1.31897	1.05978	0.72788	1.09739	1.75543	1	1.36696
ARAF-14	ARAF	x	1.13818	1.57534	0.624629	1.08453	1.29336	0.916549	0.751584	1.17594	1.02406	1.40671	1.17951	1.30688	0.985112	1.25948	1.13362	1.26221	1.24357	1.03538	1.09106	1.27598	1.31588	1.23329	1.1608	1.22742	0.949057	1.57725	2.40747	0.978687	1.11372	1.16996	1.33519	1.5231	1.07281	1.18332	1.15988	1.06399	1.06678	1.29647	1.16084	1.25738	1.26651	0.982051	1.29752	1.86559	1.20256
ARAF-15	ARAF	x	1.17268	0.748031	1.16304	1.04613	0.888689	0.925734	1.1883	0.656477	0.991611	0.934498	1.0195	1.07233	1.01661	0.838652	0.605753	1.11753	1.18293	1.05389	0.827652	1.24091	0.633803	1.19825	1.09799	0.998569	0.677991	0.875912	1.18151	1.04762	0.769517	0.801556	1.21951	1.38983	1.0983	0.992117	0.638835	1.11779	1.15113	0.889671	1.18735	0.827179	1.3	1.16384	0.976366	0.881159	0.964689
ARAF-16	ARAF	x	0.904509	1.09142	0.855623	1.11424	1.14458	1.11876	1.17925	0.950054	1.11169	1.03456	1.11226	1.20591	1.008	1.29974	1.03323	1.0114	1.01634	1.0443	1.19778	1.45698	1.21044	1.55176	1.26177	1.21282	0.614857	1.09399	1.07609	0.784014	0.920934	1.05128	1.10604	1.18322	1.34628	0.968718	1.19495	1.50421	1.24101	0.975177	1.2885	1.39415	1.39538	0.831818	1.25487	1.10405	0.915909
ARAF-17	ARAF	x	0.907965	1.66393	0.55873	1.22491	1.07531	1.01193	0.733418	0.8159	1.36995	1.03728	1.03204	1.22192	0.870253	0.834835	0.977778	0.850365	0.950931	1.22287	1.49645	1.32943	1.08445	1.37451	1.02086	1.54711	1.40915	1.0137	0.656751	0.876984	0.947253	1.03657	1.21739	0.938808	1.31774	1.23672	1.30992	1.05889	1.11875	1.56795	1.02347	1.31443	0.965706	1.04025	1.58247	0.659808	1.15472
ARAF-2	ARAF	x	0.878719	1.23989	0.695652	1.09383	1.1798	1.18293	1.13725	1.4931	1.38761	1.0313	1.12703	1.08982	1.02118	1.3392	1.01225	1.19894	1.63824	0.795276	1.30115	1.29814	1.39769	1.61446	1.15682	1.29515	1.24064	1.048	1.33113	1.16361	1.06501	1.06829	1.34735	0.773171	1.65517	1.17131	1.05329	1.00285	1.20556	1.21807	1.25	0.661367	1.63748	1.03143	0.6407	1.45929	1.40079
ARAF-3	ARAF	x	1.24471	1.24722	1.21326	1.08303	0.900227	0.893333	1.20889	0.935772	1.25623	0.943682	0.908759	1.02286	0.875433	1.21537	1.00235	0.599585	0.833166	1.28019	0.852874	1.29197	1.19146	1.20336	1.16683	1.13162	0.727211	1.00569	1.19949	0.939212	1.17445	1.00795	0.714134	1.23656	0.920847	0.832244	1.02534	0.885827	1.05777	1.28443	1.09524	0.709244	0.972952	1.6084	0.806723	1.05719	1.3085
ARAF-4	ARAF	x	1.02887	1.06349	1.03491	0.975113	1.00818	1.32708	0.954451	1.22428	1.25455	1.63569	1.2975	1.78275	1.15152	1.11392	1.23697	1.18859	0.942553	1.17467	1.5125	1.33898	1.25459	1.04945	1.46679	1.40775	1.17485	0.43909	0.861066	0.905277	1.22902	0.977747	1.11321	0.664683	1.52183	0.795031	0.872504	0.829427	0.954178	1.19945	1.26598	1.33333	1.00917	1.21828	1.04918	1.42385	1.11754
ARAF-5	ARAF	x	1.37055	1.23182	1.25328	0.94452	1.14191	0.958777	1.26782	1.09599	1.00679	1.08146	1.20878	1.18272	0.979141	0.915508	0.980453	1.1595	1.31656	1.53151	1.48328	1.43884	1.56406	1.43941	1.31038	1.47609	1.15681	1.5493	2.00365	0.900322	1.03742	1.13416	1.24717	2.51878	1.55762	1.18371	1.48508	1.09302	1.28995	1.33917	1.28205	1.35028	1.03727	1.08123	2.70148	1.14996	1.25361
ARAF-6	ARAF	x	1.44788	1.11048	0.803922	1.29778	1.16791	1.16438	1.70538	0.925121	1.27438	1.13191	1.06275	1.24228	1.78358	1.03155	1.30154	1.12177	1.18929	1.12548	1.46245	1.15203	0.949458	1.46061	1.07222	1.45562	0.989011	1.96486	1.57831	1.39777	0.710049	1.06135	1.94462	0.793956	1.03537	1.17965	1.19178	1.14496	1.44889	1.03534	1.56696	1.53371	1.51691	0.645089	1.51685	1.62802	0.84375
ARAF-7	ARAF	x	0.807963	0.933884	1.30343	1.12531	1.06729	1.04157	1.72506	1.21138	0.861272	1.40775	0.981742	0.903409	0.971774	0.933775	1.0604	1.10101	1.11053	1.11264	1.56433	1.13669	1.33333	1.08637	1.21344	1.47468	2.06079	1.27869	2.87252	0.848726	1.20805	0.923291	1.6289	0.815271	1.48889	0.982036	0.988391	0.817664	1.24219	1.55723	1.46036	1.55818	1.6609	1.41808	0.709091	1.95502	1.59887
ARAF-8	ARAF	x	1.09843	2.84766	1.25203	0.758017	1.32584	1.03416	0.869565	0.875839	1.59176	0.851711	0.914414	1.0202	1.02535	0.624685	1.35741	0.733333	0.954128	0.628975	1.472	1.63136	0.88806	1.01055	0.932854	0.917995	1.16121	2.68498	0.547945	0.834646	1.25135	0.697628	0.459144	1.44238	0.547703	0.988142	0.680233	1.00634	1.05687	1.05742	1.06161	0.795977	0.562648	0.692308	0.37931	0.879433	0.556213
ARAF-9	ARAF	x	1.12483	0.786967	0.639606	1.20027	0.943305	1.04898	0.832101	1.29681	1.28706	1.11032	1.06726	0.965052	1.0527	1.01524	1.03796	0.946085	0.839352	1.13599	0.866962	1.17793	1.06527	1.3506	1.1576	1.07588	0.873988	1.02242	1.26339	1.03888	0.996751	1.23171	1.1061	1.40473	1.01515	1.03362	0.837176	1.21042	1.13924	0.996951	1.32192	1.2478	0.741112	1.10098	0.788293	0.899727	1.12869
ATM-1	ATM	x	0.576923	0.641905	0.732334	1.10395	1.05338	1.1023	1.06446	0.84317	0.966044	1.12095	1.03935	1.06046	0.828473	0.86911	0.857143	0.723992	0.597137	0.644737	1.26303	1.28998	1.05812	1.59943	1.79781	1.39095	1.5045	1.92727	1.38834	0.91024	1.12735	1.06503	0.622517	0.867173	1.04878	1.06181	0.941834	0.920469	1.20449	1.16452	1.08978	1.20583	0.684838	1.30782	1.22127	0.967632	1.41265
ATM-10	ATM	x	0.473684	0.787946	0.482759	1.08598	0.925606	1.03467	0.943723	0.513115	1.27119	1.09243	1.11935	1.01781	0.716695	0.905923	0.967241	0.581897	1.06796	1.19382	0.904059	1.02712	0.908638	1.13148	0.941597	1.375	0.95739	1.17626	1.59236	0.947097	0.950311	1.00704	1.26341	0.864407	0.974227	0.953571	0.838113	1.07636	0.84323	0.904988	0.795756	0.878623	1.18051	1.14597	0.619565	1.00722	1.21812
ATM-2	ATM	x	0.820755	1.22148	0.718499	1.04186	0.997409	1.27273	0.935345	1.01952	1.01772	1.06161	1.17188	1.4761	0.977679	0.948598	1.10633	1.20497	1.07292	0.601504	1.39945	1.28533	1.13217	0.935547	1.34405	1.37684	1.02395	0.822804	1.69531	0.949045	0.866541	0.984962	1.14067	1.07184	1.46043	0.680715	1.32587	1.41577	1.27273	1.15605	0.966912	1.45074	0.84	0.820961	2.06404	0.418947	0.947598
ATM-3	ATM	x	0.779349	0.782723	0.921127	1.00785	0.824695	1.09213	0.763872	1.40488	0.62907	1.01641	1.19599	0.973349	0.941263	0.755527	0.918874	0.824176	0.602961	0.785592	1.02525	1.03226	0.993311	1.04028	1.18648	1.27649	0.91067	1.04467	1.01007	1.01955	1.06471	0.955734	1.02619	0.658576	1.04333	0.970019	0.837656	0.920273	0.886364	1.01172	0.985765	0.832024	0.471316	0.835873	1.07859	0.508436	0.77374
ATM-4	ATM	x	0.30444	0.661123	0.394608	0.826087	0.948775	0.856237	1.03499	0.875	0.722408	1.33381	1.01225	1.15804	0.659229	0.691622	0.728421	0.450935	0.891353	0.540146	1.10909	1.06944	0.998127	1.33237	1.49684	1.22695	1.23834	1.00138	1.20385	0.941586	1.00434	0.882907	0.547739	0.470348	0.858447	0.840756	1.06632	0.836526	1.12234	0.842407	1.22466	0.656151	0.823976	0.574303	0.440063	0.60698	0.568111
ATM-5	ATM	x	0.652278	0.565445	0.439909	1.01651	0.878109	0.94015	0.891213	1.09426	0.552265	0.895415	1.20769	1.13051	0.695187	0.45975	0.538991	0.410678	0.662469	0.534118	1.3726	1.06515	0.997118	1.49649	1.52941	1.36271	0.862944	1.87196	2.92843	0.758573	0.940729	0.998551	1.18966	0.762836	0.809783	1.09552	1.10526	0.971108	0.976401	0.644022	1.01333	0.496825	1.29423	0.691235	0.663492	1.15577	0.701195
ATM-6	ATM	x	1.31762	1.38843	1.10888	0.934718	1.28916	0.966463	1.88861	1.51628	1.7824	1.11168	1.39583	1.13874	1.49875	1.17666	1.49112	1.15152	0.967836	1.38162	1.25137	1.04124	1.09659	1.37598	1.47631	1.55782	2.64807	1.94268	2.01833	0.8864	0.870588	1.07692	1.97628	0.681818	0.727723	1.272	1.05034	0.853226	1.787	1.71672	1.31741	0.74115	1.05947	1.47783	0.506637	1.23128	1.5197
ATM-7	ATM	x	0.776567	1.02454	0.8275	1.21503	1.14698	1.00482	1.47619	0.960557	1.34152	0.953556	1.19101	1.04006	1.27949	1.15072	1.20266	0.656357	0.968085	0.927835	1.40674	1.27005	1.20442	1.27027	1.18135	1.63002	1.94536	1.5988	0.912245	1.17228	0.970383	1.21004	0.681063	1.73457	1.02414	1.22015	0.60218	1.23913	1.341	1.19935	1.10036	1.08178	0.667382	1.31537	1.35748	0.939914	0.932136
ATM-8	ATM	x	0.949254	1.23846	1.48688	1.19143	1.04294	1.12596	0.832569	0.988014	1.262	1.21521	1.53484	1.12415	1.55362	1.08176	1.45567	0.892958	0.924855	1.6436	1.26629	1.70213	1.30966	1.42147	1.29908	1.4398	1.56213	0.914934	1.05941	1.0566	1.00505	1.27705	1.41772	1.32174	0.978437	1.07858	0.915254	1.35597	1.27914	1.39867	1.31183	1.00341	1.3427	1.42553	1.10922	1.55431	1.12128
ATM-9	ATM	x	0.567857	0.886275	0.585227	0.897133	0.845238	0.952137	0.7632	0.784161	0.762791	0.952891	1.02622	1.23821	0.709538	0.785303	0.789634	0.674747	0.814433	0.569196	1.0994	0.847039	1.13121	1.44414	1.46386	1.71707	1.90153	1.42335	1.74667	1.18771	1.1764	1.07773	0.940246	0.960396	0.775578	0.974457	0.763682	0.827206	0.757576	0.786448	0.923611	0.809756	1.08185	1.03678	0.99187	0.703869	1.01839
ATR-1	ATR	x	2.11661	0.717241	0.82069	1.37452	1.05145	1.1723	0.7543	1.00263	0.646778	1.28495	1.01018	0.966825	1.82305	0.863905	1.61372	0.612782	1.07722	0.674897	1	1.00366	1.04062	0.829736	0.841709	0.98338	0.781659	0.302326	0.511945	0.956522	1.06904	0.959732	0.328125	0.962547	0.479087	1.06793	0.765766	0.921839	0.805344	0.919231	0.573883	0.97201	1.24943	1.39524	0.725191	1.1373	1.7119
ATR-10	ATR	x	0.327628	0.676712	0.548105	1.08232	0.953425	0.870482	0.324226	0.334646	0.291747	0.532833	0.510753	0.43686	0.750623	0.689373	0.621984	0.191646	0.264398	0.447307	0.461765	0.694444	0.330601	0.496614	0.539007	0.529545	0.967972	0.393564	0.21501	0.626409	0.771704	0.720365	0.197368	0.322251	0.371105	0.491525	0.61039	0.374257	0.199413	0.223301	0.42623	0.654991	0.679012	0.582353	0.588441	0.373898	0.809804
ATR-2	ATR	x	0.284644	0.315582	0.233645	0.507128	0.477131	0.607029	0.16526	0.377498	0.272436	0.315268	0.356771	0.376822	0.414013	0.493768	0.383691	0.237403	0.291225	0.225867	0.376483	0.395901	0.308791	0.415247	0.395683	0.374238	0.294118	0.43986	0.396366	0.585079	0.487059	0.637478	0.466196	0.444149	0.475862	0.323012	0.339607	0.326895	0.298925	0.243697	0.323062	0.267988	0.389459	0.289013	0.17254	0.442847	0.26732
ATR-3	ATR	x	0.789308	0.462291	0.7856	0.753731	0.683068	0.769784	0.492958	0.425245	0.823322	0.725055	0.696099	0.710021	0.815574	0.798658	0.88024	0.757685	0.686567	0.523734	0.760791	0.484615	0.738657	0.937107	0.566845	0.564965	0.447837	0.628329	0.338835	1.0843	0.868397	0.759714	0.634361	0.30303	0.745763	0.808793	0.688172	0.832078	0.42329	0.614943	0.33574	0.69457	0.855705	0.540909	0.654977	0.861298	0.448864
ATR-4	ATR	x	0.442308	0.454545	0.408669	0.807471	1.10145	0.929054	0.508235	0.903475	0.568063	0.638202	0.821244	0.876963	1.02258	1.40385	0.892734	0.62766	0.794326	0.436306	1.15638	0.979933	0.921986	1.06916	0.904393	0.633423	0.282744	0.257143	1.26554	0.991649	1.11538	1.13305	1.07829	1.5	0.874494	0.804829	0.977444	0.877384	0.827586	0.426966	0.873134	0.624041	0.481383	1.04817	0.383632	0.779255	0.623853
ATR-5	ATR	x	1.28589	0.937956	1.18795	0.94473	1.23193	1.09613	2.05137	1.37716	1.63142	0.920909	0.758723	1.06277	1.31411	1.55602	1.43503	1.20471	1.44305	1.29475	1.5656	1.44764	1.19633	1.25738	1.41406	1.37905	1.59041	1.22751	1.58002	1.07538	1.06191	0.991386	1.30667	1.37154	1.25979	0.940963	0.988927	1.10857	1.42897	1.10526	1.2269	1.16008	1.077	1.0998	1.29545	1.369	1.25147
ATR-6	ATR	x	0.584615	0.130045	0.677019	0.50813	0.511628	0.634703	0.519031	0.0896739	0.423729	0.357143	0.536741	0.495575	0.280488	0.435424	0.224265	0.276923	0.281081	0.106977	0.5875	0.394737	0.306122	0.403458	0.960656	0.278746	0.554717	0.0659026	0.221865	0.452991	0.303109	0.5427	0.524752	0.454545	0.0646766	0.176101	0.348039	0.367601	0.433673	0.380682	0.421348	0.701422	0.72332	0.673139	0.322275	0.233202	0.294498
ATR-7	ATR	x	0.206266	0.268349	0.271505	1.02108	0.858427	0.854762	0.414044	0.24581	0.234076	0.240413	0.240437	0.298532	0.662362	0.861345	0.650108	0.241983	0.218935	0.0889423	0.458065	0.459459	0.625	0.502935	0.51444	0.482944	0.275862	0.396934	0.204444	0.853047	0.7872	0.820827	0.163102	0.172485	0.656818	0.592357	0.687623	0.555874	0.14956	0.220339	0.194986	0.667351	0.700205	0.419729	0.299795	0.445585	0.226306
ATR-8	ATR	x	1.78916	1.41579	2.06748	1.21875	1.01429	1.60265	1.74731	1.18304	2.25339	1.13333	1.41877	1.03717	1.63636	0.787356	1.96	1.04933	1.31481	1.16667	1.50307	2.17323	0.795455	1.33937	1.49378	1.89744	0.962963	1.86486	2.43609	0.6625	1.5642	1.05556	1.01333	1.4596	1.74026	1.25292	1.90909	1.20325	1.46471	1.70588	1.01818	0.961722	0.620253	1.21397	1.20574	0.616034	0.751092
ATR-9	ATR	x	0.851598	0.625251	0.790837	1.06237	1.00414	0.841649	0.565152	0.541844	0.836918	0.442548	0.524476	0.543478	0.829099	0.779116	0.714628	0.40856	0.64898	0.448692	0.609603	0.633971	0.621429	0.876786	0.656198	0.658444	1.00428	0.817699	0.751101	0.977528	0.997436	1.05756	0.346723	0.395506	1.17593	0.679666	0.510121	0.639344	0.626761	0.458015	0.484716	0.575342	0.804565	0.677124	0.709285	0.708987	0.698039
AURKA-1	AURKA	x	0.357542	0.347639	0.352381	0.430233	0.584906	0.508772	0.0699301	0.293729	0.147541	0.370482	0.141618	0.102138	0.5	0.409253	0.587302	0.148148	0.209756	0.317308	0.625	0.342975	0.253125	0.222552	0.257971	0.357143	0.435374	0.33209	0.180587	0.544025	0.170426	0.201389	0.485714	0.460526	0.0536398	0.22381	0.346591	0.484694	0.0681818	0.0934066	0.128834	0.288256	0.511628	0.165517	0.131673	0.496124	0.0793103
AURKA-10	AURKA	x	0.425573	0.468235	1.1005	0.765808	0.528384	0.494253	0.159744	0.26087	0.436975	0.44186	0.437168	0.392647	0.404762	0.467505	0.283168	0.366743	0.550827	0.604592	0.750577	0.4329	0.530184	0.418647	0.580645	0.384201	0.435931	0.626305	0.371703	0.211886	0.271057	0.337224	0.679325	0.592075	0.540206	0.492537	0.494598	0.359697	0.268765	0.295673	0.257812	0.7157	0.466089	0.505172	0.483734	0.235209	0.518966
AURKA-2	AURKA	x	0.54955	0.371115	0.566553	0.76461	0.74552	0.556303	0.436261	0.349398	0.322115	0.275328	0.306604	0.287532	0.718944	0.729299	0.555721	0.570039	0.341071	0.537109	0.466231	0.427451	0.306338	0.579243	0.400915	0.480946	0.247634	0.597968	0.215202	0.423542	0.336992	0.419167	1.04563	2.14549	0.923577	0.377297	0.377317	0.547646	0.302231	0.393548	0.424594	0.905585	0.775542	0.377129	1.03723	0.758514	0.36253
AURKA-3	AURKA	x	0.0677966	0.192708	0.0858369	0.615789	0.552147	0.61236	0.406091	0.320988	0.103896	0.471204	0.377593	0.404762	0.462366	0.380711	0.155102	0.374269	0.286822	0.305882	0.509804	0.296804	0.408805	0.131687	0.3125	0.217082	0.218182	0.0552326	0.0121457	0.643154	0.5	0.40411	1.69512	1.05963	0.777778	0.547244	0.293051	0.708333	0.379562	0.355072	0.261905	0.219251	0.12069	0.159722	0.336898	0.0103448	0.520833
AURKA-4	AURKA	x	0.30597	0.135945	0.144414	0.403794	0.363636	0.344059	0.0465116	0.168986	0.131373	0.097166	0.0553633	0.0848126	0.215847	0.246548	0.366359	0.0773639	0.143293	0.0465686	0.190341	0.139842	0.105556	0.212719	0.159353	0.182232	0.022792	0.006	0.0401855	0.326687	0.185393	0.244505	0.263566	0.020595	0	0.186441	0.156499	0.278798	0.123746	0.115987	0.0283019	0.603478	0.290514	0.278788	0.50087	0.375494	0.286869
AURKA-5	AURKA	x	0.363309	0.411552	0.615108	0.589744	0.532646	0.750903	0.169139	0.0815789	0.0916442	0.273364	0.266821	0.11358	0.619946	0.409556	0.573379	0.254613	0.353571	0.229008	0.299652	0.455882	0.302703	0.342784	0.192308	0.440806	0.120275	0.0835267	0.151943	0.445013	0.331096	0.327394	0.25498	0.616099	0.51341	0.334086	0.349693	0.988604	0.107266	0.198157	0.233607	0.585366	0.368564	0.367299	0.219512	0.425474	0.398104
AURKA-6	AURKA	x	0.16129	0.284722	0.45098	0.646853	0.679012	0.72973	0.434028	0.487252	0.464516	0.550633	0.506925	0.576923	1.10619	1.36546	0.711111	0.590038	0.242857	0.475207	0.437209	0.538462	0.907407	0.397229	0.624658	0.655063	0.416667	0.278802	0.240275	0.614035	0.382716	0.394636	0.788136	1.10549	0.852381	0.475751	0.848375	0.557692	0.296943	0.50211	0.46383	0.424332	0.851266	0.633634	0.409496	0.490506	0.681682
AURKA-7	AURKA	x	0.829502	0.79896	1.16973	1.05576	1.04948	1.11212	1.28501	1.02092	0.873437	0.407637	0.479532	0.363229	1.24744	1.379	1.16562	0.776965	0.99154	0.716753	1.12224	1.26966	1.60465	1.04255	1.1	1.13083	0.536827	0.389392	0.292216	1.25061	0.964323	1.16726	2.03226	1.12029	1.2027	1.2555	0.865772	0.97732	0.599558	0.463074	0.61875	1.09138	1.32293	1.36339	1.11619	1.55631	1.79235
AURKA-8	AURKA	x	0.611717	0.393136	0.208978	0.447167	0.391433	0.532986	0.276463	0.264059	0.106383	0.101058	0.195584	0.282081	0.804511	0.598976	0.579023	0.37561	0.485714	0.291176	0.402191	0.573883	0.584395	0.404385	0.379581	0.359146	0.157161	0.259259	0.413551	0.361576	0.330479	0.414327	0.804185	0.965058	1.29561	0.570093	0.781288	0.693757	0.179756	0.165736	0.16341	0.483948	0.504515	0.840547	0.537455	0.582393	0.779043
AURKA-9	AURKA	x	0.564433	0.716253	1.00707	1.23913	0.953216	1.01802	1.03733	1.3796	1.70531	0.69	1.07018	0.779661	1.45679	1.27895	1.01295	1.3038	1.63889	1.84321	0.48249	0.501818	0.304094	1.48177	1.27157	1.30383	1.62931	2.88612	1.21154	1.01984	0.978764	1.33396	0.891525	1.72485	1.19031	0.977273	1.52242	1.20784	1.31317	1.22727	1.26014	1.25195	1.08173	0.835267	1.36364	0.901442	0.610209
AURKB-1	AURKB	x	0.555133	0.516704	0.420202	0.770138	0.804878	1.01415	0.576271	0.458333	0.365994	0.52795	0.472637	0.63593	0.990868	1.00725	0.793621	0.600402	0.362205	0.509599	0.610766	0.853659	0.810606	0.781967	0.737342	0.968647	0.216828	0.239735	0.365889	1.18543	0.921019	1.04519	0.454352	0.449462	0.489681	0.69599	0.943262	0.892966	0.38041	0.31422	0.37819	0.701803	0.621212	0.811538	1.02913	0.619835	0.819231
AURKB-10	AURKB	x	0.837264	0.796703	0.426471	0.946429	1.10334	1.10574	0.539078	0.581162	0.893899	0.805944	0.706815	0.796053	0.65	1.02094	0.714943	0.663818	0.813149	1.53988	0.920886	0.83631	0.714777	0.85553	0.966102	0.651625	1.87467	0.450758	0.695825	0.776952	1.0224	0.839216	0.437143	0.67663	1.05128	1.01149	0.803523	1.21984	0.442953	0.686007	0.481848	1.2457	0.7713	1.10968	0.938575	1.03139	1.06022
AURKB-11	AURKB	x	0.987342	0.640523	1.47518	0.962162	0.987097	0.630303	1.04598	1.12821	1.18325	0.694444	0.719231	0.81893	1.48408	1.2809	1.14721	0.605263	0.659898	0.651961	1.06338	0.970588	0.705202	0.582278	1.0203	0.946078	0.542601	1.16598	0.618321	0.585106	1.06827	1.74	0.343284	0.979695	0.324324	1.24138	1.27848	0.636888	0.697368	0.895522	0.719745	1.03004	2.38547	0.512315	0.918455	2.07263	0.906404
AURKB-12	AURKB	x	0.301708	0.626642	0.220665	0.933333	0.952479	0.973832	0.170213	0.402204	0.367583	0.424725	0.444751	0.447619	0.94186	0.919266	0.633515	0.340226	0.375527	0.180657	0.659134	0.85259	0.578853	0.582467	0.617931	0.807918	0.105714	0.174387	0.22108	0.921478	0.92	0.804624	0.404635	0.311983	0.242485	0.363727	0.40799	0.476378	0.241453	0.353488	0.203991	0.689597	0.508083	0.505181	0.895973	0.471132	0.358808
AURKB-13	AURKB	x	0.374449	0.673554	0.497487	0.731183	1.02018	0.8875	0.466555	0.285942	0.490511	0.545342	0.408743	0.504961	0.661194	1.20958	0.835115	0.214894	0.288288	0.217899	0.576862	0.687873	0.67002	1	0.990489	0.930421	0.439759	0.2851	0.241379	0.815271	1.03129	0.783619	0.693416	0.23689	0.969262	0.529478	0.426094	0.57156	0.261283	0.320093	0.20438	0.639553	0.540059	1.13276	0.679426	0.578635	1.13103
AURKB-14	AURKB	x	0.466184	0.602151	0.584475	0.748879	0.748235	0.997701	0.577741	0.670157	0.930185	0.478043	0.317804	0.317111	0.588106	0.941048	0.752049	0.526549	0.850785	0.382022	1.05026	0.880282	0.967391	0.840996	0.857627	0.995807	0.48	0.43299	0.391433	0.934903	1.15729	0.934053	0.372642	0.351621	0.457421	0.988166	0.677796	0.594101	0.339024	0.480861	0.449468	1.41837	0.666058	1.13278	1.81122	0.403285	1.4751
AURKB-15	AURKB	x	0.486111	0.33935	0.232517	0.774752	0.787815	0.841743	0.384146	0.38653	0.334579	0.476676	0.434132	0.169374	0.659193	0.512821	0.433566	0.224074	0.312343	0.266533	0.779255	0.50591	0.504854	0.642857	0.619792	0.627151	0.384088	0.174962	0.410959	0.452354	0.427562	0.639864	0.503279	0.413194	0.305769	0.600596	0.417647	0.474674	0.29274	0.722973	0.370614	0.781593	0.682171	0.497724	1.0522	1.07106	0.77997
AURKB-16	AURKB	x	0.236957	0.126506	0.331646	0.47494	0.413636	0.552561	0.190779	0.308571	0.289608	0.284639	0.304196	0.15781	0.498701	0.447942	0.393574	0.334812	0.284065	0.242574	0.353425	0.149367	0.197943	0.444685	0.437895	0.416162	0.357006	0.0946292	0.40249	0.425626	0.621514	0.392613	0.140426	0.209163	0.230047	0.254703	0.193493	0.418647	0.268409	0.326478	0.423684	0.350097	0.293292	0.275281	0.454545	0.205928	0.245318
AURKB-2	AURKB	x	1.19394	0.940984	0.574468	0.769014	0.882184	0.623762	0.614561	0.740933	0.642412	0.596078	0.867495	0.535922	0.741514	0.916923	0.759804	0.646688	0.595745	0.749333	0.419023	0.617329	1.2521	0.592689	0.57772	0.899705	1.02795	0.742	1.67456	0.720887	0.62709	0.755814	1.04294	1.15736	0.579075	0.899344	0.821256	0.830375	0.560137	0.681979	0.64726	0.975359	0.962343	0.779775	0.909651	0.665272	0.777528
AURKB-3	AURKB	x	0.69917	0.470852	0.442424	0.770386	0.674603	0.84689	0.686275	0.5625	0.666667	0.357055	0.572716	0.45283	0.707207	0.651303	1.00688	0.658854	0.591793	0.410417	0.622449	0.657224	0.627717	0.471404	0.597378	0.634454	0.935043	0.580214	0.728487	0.779805	0.82404	0.553483	0.44375	0.669202	0.480211	0.944134	0.662953	0.766193	0.433604	0.482587	0.395577	0.622575	0.426606	0.414264	0.652557	0.542813	0.954476
AURKB-4	AURKB	x	0.381342	0.621723	0.7338	0.72	0.684474	0.794275	0.480996	0.515831	0.762811	0.632972	0.557737	0.450056	0.619048	0.580848	0.536351	0.836397	0.854442	0.647601	0.7463	0.522807	0.647177	0.584877	0.926591	0.799718	0.54454	0.880862	1.07487	0.651648	0.786517	0.784512	0.824	1.03148	0.677311	0.709452	1.08493	0.863584	0.727488	0.566148	0.431452	0.4214	0.460203	0.735493	0.652576	0.470333	0.750337
AURKB-5	AURKB	x	0.500782	1.13417	0.858929	0.843803	1.03731	0.946714	0.810157	0.668293	0.880756	0.517717	0.727603	0.759174	0.739286	1.13265	0.815047	0.927852	1.07198	1.13413	0.78937	0.875926	0.726795	1.099	0.949919	0.84148	0.836013	1	0.864303	0.903805	0.746835	0.892253	1.10488	0.915563	0.804921	0.846067	0.890121	1.07256	0.971717	1.06074	0.939068	1.20111	0.60241	1.16819	1.03889	0.740964	1.33295
AURKB-6	AURKB	x	0.333333	0.262411	1.056	1.42553	1.12712	0.838926	0.246575	0.185	0.300518	0.301136	0.199005	0.292818	1.46154	0.291971	1.45745	0.383838	0.327731	0.161538	1	1.50617	0.771654	0.855422	0.805714	0.712707	0.0763889	0.037037	0.0147059	1.50242	1.23786	0.760956	0.4625	0	0.413462	0.573705	0.519685	0.78866	0.201754	0.17757	0.323944	0.342105	0.626374	0.365979	0.372807	0.879121	0.623711
AURKB-7	AURKB	x	0.423214	0.445794	0.316042	0.554082	0.644535	0.618785	0.469418	0.412527	0.381415	0.306341	0.217781	0.340385	0.465947	0.478381	0.684422	0.420696	0.395897	0.436222	0.429825	0.367829	0.486034	0.361596	0.40556	0.405384	0.401434	0.206629	0.580983	0.747232	0.463801	0.581568	0.73954	0.284757	0.358223	0.5189	0.441379	0.432083	0.375144	0.31101	0.306593	0.448503	0.530775	0.484046	0.406136	0.385952	0.466395
AURKB-8	AURKB	x	1.01431	0.429048	0.490018	0.606299	0.777978	0.603503	0.187586	0.680576	0.534075	0.367463	0.412514	0.286946	0.499239	0.64031	0.398204	0.38061	0.118506	0.171875	0.507071	0.412671	0.385932	0.609859	0.653295	0.488342	0.516497	0.316547	0.44898	0.627302	0.773262	0.896739	0.849462	0.615546	0.429175	0.38641	0.583333	0.566779	0.178357	0.212724	0.299781	0.426966	0.483376	0.498094	0.425718	0.602302	0.754765
AURKB-9	AURKB	x	0.330544	0.538752	0.279264	0.670251	0.680812	0.791434	0.20418	0.68272	0.644013	0.319865	0.473171	0.396594	0.630975	0.807615	0.625	0.394683	0.292593	0.378731	0.687793	0.453155	0.509615	0.478395	0.465793	0.466077	0.530831	0.386305	0.552393	0.871465	0.691094	0.654255	0.433099	0.250943	0.976127	0.399497	0.487933	0.532544	0.367521	0.325056	0.226044	0.593796	0.710652	0.572254	0.675037	0.54213	0.536127
AURKC-1	AURKC	x	0.968689	1.16856	1.69159	0.952984	1.27149	1.18824	1.22181	1.1879	1.38154	1.44578	1.16821	1.19437	1.43882	1.47505	1.24648	1.07453	1.24158	1.25195	1.12088	1.35526	1.4633	1.29563	1.29457	1.21295	1.52758	0.648284	1.43726	1.03023	1.17862	1.35168	1.24599	0.97074	0.952471	1.65397	1.43708	1.18533	1.54176	1.16631	1.37923	1.7608	1.4768	1.37064	1.88538	1.4	1.48983
AURKC-10	AURKC	x	1.36154	1.4257	1.01176	1.19778	1.24948	1.07563	1.32927	1.17378	1.01869	1.29614	1.23768	1.14985	0.877941	1.17949	1.25474	1.76957	1.35541	1.30964	1.80851	1.62389	1.13111	1.06667	1.11563	1.49291	1.44228	1.35976	1.20228	1.20097	1.21632	1.12792	1.53267	1.60849	0.513258	1.25162	1.47321	1.0028	1.32244	1.26619	1.5759	2.30377	1.51598	1.16667	3.80566	1.20244	1.47819
AURKC-2	AURKC	x	1.29513	1.25123	1.14637	1.11096	1.12429	1.2595	1.15926	1.28926	1.56825	1.13945	1.15997	0.922355	0.884161	1.29389	1.14219	1.06154	1.37875	0.944297	0.973005	1.22207	1.30435	0.993915	0.98944	1.30769	1.21256	1.124	0.814168	0.890169	0.946454	1.17116	0.81774	0.85	1.02948	1.28733	1.25636	0.95735	1.27312	1.27566	1.1049	1.17262	0.632258	1.04861	1.29762	1.00553	0.858507
AURKC-3	AURKC	x	1.27793	1.24419	0.992327	1.09453	0.897436	1.56364	1.25275	1.70779	1.55172	0.83659	1.16544	1.34469	0.844504	0.829146	1.07264	1.34839	0.869919	0.990991	1.62191	1.20664	1.83058	1.33492	1.13936	1.16588	0.887712	1.51716	0.908146	1.13023	1.13066	1.34848	0.874092	1.74613	1.03205	1.31498	0.834601	1.13949	1.30195	1.31915	1.22727	0.686888	0.835417	1.22175	1.33659	0.747917	1.59701
AURKC-4	AURKC	x	0.810771	0.866864	1.37065	1.0085	0.859269	0.804348	1.77891	1.13398	1.08363	0.965848	0.930041	0.966418	0.938129	0.964286	0.882674	1.31363	0.777251	1.18771	0.848266	1.03295	0.87234	0.804622	1.00344	0.811518	1.2337	0.635807	0.866178	1.16364	1.02262	0.84565	0.576507	1.14505	0.923333	1.04082	0.997278	0.935043	1.09018	0.885496	0.878893	0.75166	0.828775	1.09113	1.03586	1.13199	1.07412
AURKC-5	AURKC	x	1.38695	1.027	1.3269	1.07906	1.25921	1.13752	1.44096	1.21202	1.33065	1.65048	1.26448	1.35303	1.36964	1.35011	1.33079	1.07524	1.37971	1.08207	1.46887	1.55126	1.29699	1.14644	1.11948	1.35815	1.52853	1.15424	1.40918	1.18068	1.19896	0.88315	0.679907	1.54231	1.46889	1.13422	1.48745	1.48757	1.32118	1.49273	1.31847	1.19437	1.10625	1.09915	1.20469	0.978571	0.945299
AURKC-6	AURKC	x	1.03977	1.0108	0.756173	1.16465	1.11975	1.03756	1.43944	1.74607	1.49633	1.01591	1.13279	1.2112	0.902083	0.931772	1.09198	0.924	1.05675	1.05607	1.02675	1.1128	1.3526	1.04066	1.13818	1.16499	1.38689	1.04524	0.946868	0.902703	1.05683	1.35428	0.711842	1.11667	0.745247	1.12479	0.944361	1.12974	0.956909	1.07971	1.17241	1.04735	1.08641	1.37157	0.835227	1.37804	1.37395
AURKC-7	AURKC	x	1.37229	0.968045	0.950355	0.98087	0.97482	1.02308	0.931319	1.28871	1.84438	1.06683	0.971033	1.07028	1.1503	0.99278	1.28519	0.652727	0.786408	0.844098	1.1957	0.836935	1.09628	1.13776	1.06178	1.13036	1.39041	0.96562	1.20221	0.893229	0.919793	1.35022	1.78926	1.25553	0.707182	1.23422	1.0439	1.00489	0.820128	1.16355	0.92569	0.650138	0.750353	1.46235	0.607438	0.640339	1.75131
AURKC-8	AURKC	x	1.35147	0.940568	2.02607	0.952118	1.50924	1.19388	1.56089	1.583	1.5427	0.998663	1.39163	1.4487	1.02219	1.38148	1.74178	1.36616	1.03351	1.66416	2.01055	1.10331	1.2764	1.17515	1.14484	0.9952	1.81308	1.01072	1.77057	0.802168	1.15327	0.949541	2.19059	1.04338	2.05995	1.08354	0.862613	1.40496	1.60163	1.37355	1.29609	2.34087	1.44463	1.66327	2.12241	1.60992	1.45714
AURKC-9	AURKC	x	1.08333	1.04272	1.20812	1.12897	1.03704	0.986949	1.34357	1.53519	1.26398	0.96408	1.06236	1.22459	1.14894	1.13353	0.959936	1.01565	1.07942	0.895149	0.979381	0.989381	1.25896	1.03429	1.40429	1.09505	1.97115	0.789097	1.11927	1.21296	0.931183	1.31479	1.26445	1.24296	0.967308	0.933708	0.806415	1.09826	1.07911	0.946535	0.831144	1.42504	1.06711	0.991326	1.29985	0.868421	1.03222
AXL-1	AXL	x	0.834821	0.833333	0.965217	0.976015	0.958491	1.02301	2.05484	1.1406	1.01721	0.70118	0.782936	0.670935	1.1683	1.13546	0.885036	0.806897	0.651948	0.893365	0.73251	0.944086	1.08584	0.936556	0.963247	0.81296	0.994737	1.58814	0.685345	1.28806	0.984463	0.798017	1.4292	1.14967	1.36534	0.852503	1.43115	0.8	0.684211	0.8	0.760101	1.25918	1.23211	0.768971	0.909287	1.00175	0.799325
AXL-10	AXL	x	0.481395	0.841713	1.02331	1.11265	1.06413	1.03506	1.46689	1.02389	0.941569	0.793997	0.629227	0.660934	1.11925	1.20332	1.03063	0.718894	0.853448	0.92663	0.928571	1.40574	0.837449	0.837971	1.02463	0.680973	1.20451	1.68855	0.959417	1.23394	1.08441	1.01135	1.33584	0.872483	1.06582	0.817027	0.775773	0.806242	1.08929	0.792771	0.625561	0.613718	0.81932	0.668394	0.460289	1.02504	0.450777
AXL-11	AXL	x	0.709138	1.13469	1.06077	0.97905	1.03314	0.94751	1.45903	1.70238	1.24973	0.985361	1.30133	1.10526	0.654822	0.934469	1.14602	1.3518	1.30705	1.55825	0.959029	1.07953	1.22034	1.11832	1.29766	1.36611	2.06011	2.3957	1.46653	0.975171	0.670579	1.0451	1.2	1.15184	1.0486	0.915076	1.04634	0.893048	0.98125	0.825119	0.883281	0.705562	0.957627	0.728741	0.581243	0.978814	0.738428
AXL-12	AXL	x	2.33493	1.60886	1.22556	0.955836	0.934641	1.36486	1.80294	1.35606	2.46102	1.12351	1.30995	1.06615	1.00817	1.3586	1.87209	1.41921	0.934783	1.90204	1.49643	1.07018	1.38489	1.25061	2.04248	1.7403	1.25397	0.634328	1.7995	1.01271	1.08506	1.09013	2.01418	0.976027	1.36937	1.42893	1.11597	1.15618	1.38911	1.54506	1.19216	1.70071	1.4031	1.87798	1.46793	1.39535	1.85942
AXL-13	AXL	x	1.19788	1.23771	1.17327	1.08891	1.24081	1.12676	1.23881	1.18788	1.3649	0.943245	1.02048	1.15284	1.14499	1.29122	1.39199	1.04734	0.9163	0.990857	1.25418	1.20408	1.2986	1.20019	1.38248	1.3097	1.63194	1.3122	1.19504	1.387	1.12929	0.936925	1.45509	1.26932	1.00906	0.99483	1.32345	1.0179	1.1841	1.16499	1.12625	1.66871	1.22142	1.25556	1.43383	0.960073	1.31368
AXL-14	AXL	x	0.53869	0.727869	0.786232	0.880658	0.716846	0.626959	0.857143	1.00552	0.570064	0.727794	0.649462	0.404412	0.567797	0.576547	0.617188	0.589147	0.666667	0.383142	0.669767	0.912863	0.652381	0.548173	0.684211	0.549872	0.59194	0.756972	0.775253	0.799205	0.742857	0.635992	0.362712	0.785942	0.424138	0.601415	0.70073	0.626834	0.540856	0.83004	0.707113	0.789744	0.669399	0.328877	0.535897	1.04098	0.360963
AXL-15	AXL	x	0.917729	0.922414	1.12814	1.25659	1.10668	1.25199	1.15424	1.30676	1.23168	1.06348	1.19539	1.27259	0.844492	0.71165	0.857588	1.22197	1.39477	1.16475	1.07725	0.934315	0.957497	1.07927	1.07913	0.986066	1.15219	1.47274	0.969201	1.24851	0.960027	1.0469	1.36021	0.891353	0.850467	1.2181	1.45652	0.963589	0.822686	0.800971	0.791557	1.08533	1.23083	0.96422	0.992	1.2031	0.997248
AXL-16	AXL	x	1.39662	1.63598	1.1987	1.19477	0.981935	1.17681	1.36641	1.26531	1.60753	1.53817	1.43405	1.41754	1.36791	1.26973	1.15051	1.51002	1.40716	1.25289	1.4375	1.46129	1.47785	1.34365	1.39421	1.46828	1.42901	1.18938	2.05319	1.07417	1.00083	1.42981	0.76391	0.871469	0.892038	0.975186	1.04194	1.00419	1.69504	1.51506	1.38379	1.13233	1.04688	1.47154	0.920605	0.938542	1.66159
AXL-2	AXL	x	0.998308	1.06034	1.35343	1.10649	0.981105	1.09122	1.70523	1.21854	1.31566	1.20418	1.23116	0.932498	1.05819	1.1929	0.949721	1.15545	1.30016	1.04496	0.877375	1.23946	1.12072	1.21948	1.31429	1.22135	2.18312	2.17526	1.55425	1.00493	1.07814	0.932099	1.41667	1.16338	1.6102	0.815328	0.729803	1.01342	1.08696	1.23529	1.09959	0.967193	1.12886	0.903723	0.959903	1.2094	1.03338
AXL-3	AXL	x	1.35644	0.685792	1.19143	0.972727	1.24172	1.28197	1.22881	1.12466	1.44957	1.06944	1.21847	1.22222	0.821086	1.08014	0.985795	0.903409	1.05431	1.16667	0.63245	1.19484	1.2628	1.12051	1.04713	1.25935	1.73099	1.86275	2.1125	1.3643	0.912424	0.83682	0.848875	0.787966	0.770186	1.01114	0.804878	0.945455	0.808163	0.780405	0.793706	1.59167	0.945295	0.672165	1.04167	0.890591	0.684536
AXL-4	AXL	x	1.208	0.931937	0.715706	1.02214	0.905769	1.10621	1.47788	1.2269	1.15928	0.889401	1.19527	0.957766	1.03748	0.917832	0.902527	0.919561	1.24379	0.989605	1.06926	1.18277	1.39726	1.07361	1.17736	0.891462	1.06667	2.25746	1.35034	1.07245	1.26188	1.12005	0.76234	0.983373	1.24775	0.938172	0.891065	0.927798	1.13363	1	1.2766	0.411429	0.676096	0.663338	0.508571	0.558699	0.736091
AXL-5	AXL	x	1.35412	1.48975	1.06408	1.24405	1.1369	1.07099	1.06209	1.55781	1.60465	1.39777	1.12245	1.70649	1.52655	1.41071	1.45225	1.78702	1.39692	1.02462	2.09536	1.24286	2.04953	1.4825	1.25284	1.32766	2.05882	1.13492	1.34751	1.09907	1.31879	1.06913	1.31059	1.63934	1.38911	0.902685	1.22266	1.06386	1.13415	1.59375	1.43852	0.675817	0.90483	1.74074	0.826144	1.00994	1.77915
AXL-6	AXL	x	1.05649	0.553846	0.953092	0.897119	0.993333	0.963283	1.68201	1.67238	1.74385	0.678092	0.884273	0.735294	1.15983	0.842324	1.01689	1.03474	0.922897	1.52304	1.0237	1.16894	1.24292	0.833597	1.0931	0.961214	1.31715	1.77847	1.61705	0.719059	1.09618	0.739427	1.3432	1.10782	1.21995	0.926164	1.06839	0.853825	1.20735	1.47619	0.949495	0.970149	1.10582	0.964775	0.789179	1.41446	0.757339
AXL-7	AXL	x	1.36754	1.01672	0.816547	1.03767	1.1419	1.01541	1.57589	1.25743	1.2283	0.846827	0.620853	0.707292	0.756714	1.02459	0.948542	0.742268	0.989228	1.21042	0.979087	1.0703	0.95106	1.07578	0.884569	0.892994	1.83957	2.00927	1.58003	0.995992	0.891555	1.01656	0.865913	1.01515	0.854951	1.16157	0.67639	0.874351	0.770992	0.822097	0.813084	0.699429	1.0731	0.868263	0.587429	0.836257	0.573653
AXL-8	AXL	x	1.59929	1.49799	0.930233	1.03965	1.04741	0.977578	1.01351	1.43413	1.63253	0.687631	1.26142	1.00826	0.849802	1.11739	0.88172	0.683594	0.961207	1.1751	1.06726	1.37791	0.793651	1.16129	1.03093	1.20364	1.39879	1.27832	1.30469	0.739583	0.918103	1.51531	0.259786	0.789238	0.503289	1.57239	0.983827	1.17028	0.904564	1.13575	1.04186	0.580214	1.28483	1.44138	0.647059	1.1517	2.1069
AXL-9	AXL	x	0.945709	0.837838	0.994737	1.1797	0.978078	1.13251	1.42407	1.60931	1.17852	1.21279	0.911765	1.3993	1.15104	1.36624	1.0305	0.908943	1.27976	1.34216	1.0788	1.22222	1.614	1.10541	1.12718	1.18759	1.65152	1.94005	1.51308	1.26667	1.07021	1.02463	1.26006	0.590278	1.53091	1.07494	0.995475	1.03664	1.10909	1.08034	1.17312	0.869171	0.745122	1.2213	0.88601	0.947561	0.992899
BCKDK-1	BCKDK	x	1.02174	0.513158	1.11504	0.92638	0.742138	0.660377	0.893258	0.306452	1.07207	0.588235	1.22174	0.763158	0.819149	1.00629	1.40994	1.19136	0.950704	1.72727	1.1194	0.652542	1.13333	1.16	0.937198	0.843537	0.623256	0.855895	2.11806	0.826291	0.977186	0.726891	1.28148	0.422764	1.05385	0.603448	0.611111	0.83792	0.968	0.944954	1.36449	0.587065	0.830846	0.91358	0.283582	1.03483	1.18519
BCKDK-10	BCKDK	x	0.981453	0.5	1.36947	0.955521	0.877617	0.831507	0.789474	0.881087	1.25029	0.768897	0.805061	0.799024	0.771644	1.16143	0.779539	1.1955	1.30858	0.930576	1.02773	0.985646	1.06998	1.01546	1.12092	1.08722	1.91401	0.826653	1.04502	0.894148	0.901995	0.926697	0.49697	1.72024	0.785714	0.900282	1.05742	1.03725	0.885813	0.672581	0.893846	1.26838	1.40279	1.4994	1.14702	1.36671	1.57743
BCKDK-11	BCKDK	x	1.05168	1.81864	1.38702	1.1	1.22006	1.03049	1.36819	1.20737	0.924074	1.2767	1.15704	1.27863	1.37069	1.15607	1.51988	1.392	0.98645	1.16959	1.44681	1.62284	1.30769	1.41855	1.41779	1.06178	2.01662	0.825704	1.34381	1.12539	1.3816	1.02402	1.09214	1.93354	0.992593	1.33	1.11837	1.2765	1.70588	1.6263	1.32302	0.827068	1.34529	1.52055	0.546366	2.26009	1.34475
BCKDK-2	BCKDK	x	0.717431	0.534709	1.49501	1.05455	0.737166	0.89852	0.957895	1.09863	0.859155	0.66208	0.748336	0.697509	1.14153	1.18534	0.836299	1.41164	0.795096	1.17668	0.858947	0.771765	0.841808	0.836703	0.745455	0.971781	1.2079	0.448062	0.806888	0.980271	0.751501	0.954545	0.663306	0.935841	0.772277	0.954967	0.833837	0.933225	0.947368	1.0024	1.01185	1.26647	1.51929	0.8125	1.23719	1.01484	0.681548
BCKDK-3	BCKDK	x	1.57377	1.31556	1.03254	0.980344	1.0446	0.963942	1.21891	1.36932	1.70128	1.01686	1.21753	1.69275	0.924949	1.3467	1.87977	1.36245	1.17677	1.46047	1.36503	1.38395	1.81017	1.05962	1.19672	1.23529	1.84615	1.08976	1.20939	1.06601	1.05049	0.897372	1.06509	1.44191	1.47925	1.03268	1.04296	1.47048	1.34559	1.22038	1.32692	0.821086	1.21617	1.0522	0.867412	1.47745	0.849918
BCKDK-4	BCKDK	x	1.28929	1.12835	0.887097	0.976087	0.936992	0.942529	1.40032	0.840878	0.77931	1.09922	1.03423	0.948413	1.08711	1.08519	1.3565	0.925214	1.13535	0.937608	1.19524	1.00239	0.991379	1.0081	0.979487	1.1184	0.668449	0.78798	0.85048	1.04773	0.911656	1.13381	1.79389	0.908108	0.900722	0.786802	1.10729	0.984106	0.849315	0.997959	1.0883	1.26362	1.65944	0.82362	1.28647	1.74923	0.84816
BCKDK-5	BCKDK	x	0.782274	1.01318	0.887299	0.875465	0.960152	0.922348	0.696049	0.639889	0.901716	1.0113	0.854762	0.812865	0.903374	0.7616	0.775281	1.00893	0.987854	1.17671	0.938356	0.833333	0.862069	0.757801	0.820475	0.734043	0.581749	0.688259	1.40657	0.853155	0.751501	0.719382	0.757062	1.01996	1.0322	0.874292	0.766486	1.12482	0.78714	0.888403	0.639692	1.12707	0.956012	1.01781	0.953039	0.804985	1.35878
BCKDK-6	BCKDK	x	0.855422	1.13333	1.47748	0.895082	0.696884	0.785276	0.633333	0.645977	0.872679	1.2407	0.995475	0.766212	0.669031	0.557545	0.466292	0.922297	1.31098	1.08201	0.952077	0.725076	1.11111	1.06127	1.2663	1.44954	1.14178	0.476277	1.47231	0.993322	0.710145	0.698697	1.65352	0.809659	1.56725	0.888889	0.748264	0.912698	0.765472	0.640483	0.540785	1.13027	1.36462	0.976096	1.41762	1.38267	0.850598
BCKDK-7	BCKDK	x	0.687307	0.542416	0.719101	0.977049	0.978417	0.750853	0.852083	0.496487	0.804348	0.980435	1.11966	0.969027	1.3626	1.39535	1.21557	0.866667	0.963333	1.23024	1.05825	1.01132	0.949555	0.702703	0.855586	0.972772	1.3592	1.22189	0.971182	1.24506	1.08191	0.94849	0.700326	0.618297	1.08638	0.882096	1.0083	1.03742	0.94052	1.14828	0.956954	0.792771	1.12	0.722944	0.80241	1.08941	0.766234
BCKDK-8	BCKDK	x	0.682505	1.11217	0.431127	0.641189	0.831169	0.838446	0.953398	1.06018	0.699115	0.806378	0.707176	0.908407	1.02778	0.717949	0.847358	0.989154	0.946429	0.928401	0.559585	0.653386	0.839506	0.862745	0.845173	0.744102	0.635475	0.43314	1.15081	0.714839	1.06005	1.0105	0.765766	0.85023	0.819196	0.773067	1	0.897436	0.596567	0.61461	0.788177	0.95188	1.18249	0.968595	0.866165	1.16617	0.728926
BCKDK-9	BCKDK	x	0.648485	1.94483	1.29927	0.852349	1.3037	1.25	0.797521	1.13171	1.95906	0.936652	1.06061	0.862944	1.26452	1.28859	0.801887	0.948387	0.733728	1.56115	1.43056	1.42857	1.14035	1.14525	1.0838	1.31731	1.59146	1.33333	2.92105	1.21941	0.865801	1.10042	1.21583	1.72785	0.711957	1.12558	1.26064	1.13492	1.47619	0.781818	1.15385	1.70136	2.085	1.40654	1.42986	1.83	1.82243
BLK-1	BLK	x	1.31429	0.980496	1.19449	1.10506	0.802491	1.03867	0.951613	1.57842	0.958159	0.899884	0.896104	0.850403	1.54183	1.56051	1.33206	1.17153	1.27767	1.30461	1.32414	1.15879	1.5902	0.975329	1.20399	1.23178	1.11615	1.0197	1.46676	1.16222	1.10538	1.26013	1.59604	1.52019	0.928152	1.12571	1.21296	1.12387	1.12987	1.01237	0.976834	0.893048	1.40746	1.20776	0.97861	1.10773	1.08135
BLK-10	BLK	x	1.47664	1.56311	1.1306	1.10394	0.963636	1.05172	1.16524	1.18398	1.38341	1.10838	1.27214	1.67172	1.22509	0.755556	0.907692	1.20588	1.27857	1.00906	0.65894	0.903361	1.39352	1.02279	1.67712	1.05389	1.45305	2.19182	2.32353	1.34615	1.425	0.915	2.17318	1.95604	1.43902	1.28906	1.46931	1.00983	1.12639	0.902344	1.01132	1.15342	2.12032	1	1.00822	1.57219	1.38686
BLK-2	BLK	x	0.824219	1.13449	1.3597	0.92229	1.08333	1.1215	1.08432	2.05222	1.12786	1.16279	1.31339	1.00149	1.96262	1.81414	0.903986	1.18354	1.01786	1.60706	0.917647	1.33131	0.869767	0.960674	1.35306	1.00181	1.24441	0.767103	1.37451	1.2545	0.908088	1.0678	2.37945	0.929412	1	0.925816	1.18452	1.27895	1.26118	1.24198	1.11253	1.18777	0.950565	0.898477	1.20961	0.960452	1.00338
BLK-3	BLK	x	0.86422	1.67452	0.790353	0.893155	1.14735	0.958746	1.4215	0.966353	1.21164	1.25593	0.979823	1.11872	1.06457	0.927673	0.767062	1.43233	1.01365	1.0764	1.01549	1.17094	0.994413	1.24457	0.976893	1.06069	1.39034	0.799743	1.39702	1.27057	0.971719	0.973885	1.08271	1.49585	1.48723	1.01838	0.916005	1.03054	1.42857	1.01505	1.31938	0.798956	1.19706	1.77747	0.988251	1.33676	2.01648
BLK-4	BLK	x	1.3012	1.66092	1.20994	1.18339	1.20192	1.2	1.33652	1.52812	1.08685	0.922619	1.47506	1.26509	1.13946	1.41768	1.82463	1.1971	1.03704	1.82759	1.20714	1.25503	1.26948	1.27692	0.882206	1.14583	0.862155	0.89942	0.896825	0.97731	1.44103	0.989583	1.44419	1.0056	1.04928	1.53941	1.15582	1.76064	1.07375	1.13028	1.38868	1.04989	0.960396	0.893023	0.748299	0.679208	0.595349
BLK-5	BLK	x	1.19124	1.29752	0.878571	0.989061	0.991971	0.929577	1.07239	1.03923	0.99766	1.05078	0.794872	0.974566	0.906465	0.839258	1.05308	1.21681	1.2291	1.07301	0.985612	0.971698	0.78327	0.82312	0.768398	0.939223	0.888	0.796725	0.95646	1.20093	0.97673	1.15443	1.15509	0.580729	0.968208	1.07574	1.2146	0.914603	0.993205	1.05478	1	1.5612	1.06734	1.21116	1.22065	1.06889	1.0905
BLK-6	BLK	x	1.41913	1.14286	1.3951	0.789062	0.983516	1.08427	1.33197	1.30561	1.26157	1.17671	1.02241	0.812937	0.915691	0.847328	1.00817	1.30702	0.884831	1.19505	0.769679	0.887195	0.911672	1.01288	0.888112	1.3027	1.09924	1.96765	1.30491	1.17201	1.21358	0.86859	1.33791	2.60484	1.31445	1.19109	0.767123	1.17935	1.01325	0.980501	0.929766	0.662132	1.39954	1.37374	0.537415	1.66282	1.08081
BLK-7	BLK	x	0.986559	0.648725	1.13505	0.90566	0.960894	0.931217	0.96696	1.07992	1.36009	1.1104	0.784452	0.988785	1.18296	0.841969	1.25952	0.930233	0.923077	0.945402	1.04151	1.08896	0.805158	0.630137	1.09538	0.959732	0.915	0.84898	0.873857	1.0284	0.737589	1.05929	1.68263	1.85113	1.11077	1.33613	0.891304	0.898148	0.936242	1.23108	1.07233	0.758095	0.833718	0.84633	0.994286	0.988453	0.463303
BLK-8	BLK	x	1.43889	1.33914	0.935867	1.26716	0.974296	1.01505	1.05497	1.75567	2.36611	1.46623	1.26789	1.39775	1.01011	1.45336	1.45608	1.22118	1.22437	1.48469	1.41916	1.45546	1.29172	1.25887	1.49713	1.47281	1.47284	1.38007	1.79421	0.901594	1.23695	0.920684	0.956272	1.13636	1.48725	1.19166	1.09735	1.36139	1.56894	1.64465	1.39969	1.31294	1.21359	1.06466	1.18972	0.923301	1.10656
BLK-9	BLK	x	1.06613	1.2365	1.69697	0.955556	1.12524	0.9375	1.08731	1.35976	1.45455	1.19325	1.05963	1.02968	0.98433	1.4551	1.03541	1.54545	1.07706	1.47799	0.960616	1.07317	0.834206	1.00131	0.961942	1.60611	1.27001	1.63914	1.11176	1.11111	1.23322	1.05863	1.46859	0.991497	0.667845	1.48645	1.34103	1.22683	1.0062	0.827112	1.04175	0.752258	0.657534	0.96259	1.12258	1.00872	0.906475
BMP2K-1	BMP2K	x	0.938389	0.677249	1.79104	1.27368	1.04233	1.1236	1.14113	1.03704	0.985366	1.21631	1.22993	1.13684	0.651961	1.22566	1.02252	1.56463	0.978378	1.58	1.0929	1.28058	0.981013	1.23697	0.909502	1.4555	1.79803	0.781022	1.49606	1.3218	0.983607	1.22997	1.16552	1.13514	0.7	0.929825	0.952381	1.38431	1.19014	0.919075	0.888199	0.949721	0.814685	0.892308	1.27374	0.506993	1.12308
BMP2K-10	BMP2K	x	1.23778	0.896552	0.987976	0.991031	0.939815	1.13793	0.928779	0.979058	0.98374	0.74289	1.02517	1.02367	1.03827	1.04449	0.769892	0.859649	0.728421	0.926606	0.989717	1.19452	1.11419	0.831615	1.03633	0.977186	0.684818	1.23429	1.48932	1.04608	1.02338	0.954172	1.73364	1.39181	1.59524	1.14355	1.22912	0.674745	1.06618	0.991304	1.06326	1.64765	0.904149	1.60531	1.59201	0.812589	1.49751
BMP2K-11	BMP2K	x	0.816361	1.10714	1.0471	0.982609	0.909853	0.877593	0.844828	0.872781	0.918129	0.62776	0.839901	0.839461	0.725646	0.668954	0.951724	0.911371	0.719608	0.910394	0.472325	0.600457	0.588235	0.773585	0.789127	0.726115	1.18029	1.14667	0.861295	0.743616	0.857464	1.0142	1.12008	0.407678	1.20644	0.895078	0.920489	0.916067	0.840517	0.750988	0.975155	0.754434	0.412342	1.02296	0.507503	0.381487	1.52798
BMP2K-2	BMP2K	x	0.762887	1.32184	0.606195	1.03846	0.860606	0.861905	0.692737	0.821429	0.991111	1.07971	0.726908	1.07491	1.3642	0.790816	0.618182	0.811429	1.07031	0.646465	0.902299	0.574586	0.869792	0.718487	0.808989	0.75	1.49756	1.4	0.754286	0.83737	0.823308	0.693069	0.595745	0.4	0.477987	0.872727	0.880658	1.2397	0.780702	0.859155	1.09449	0.718447	0.447761	1.46073	0.820388	0.487562	0.842932
BMP2K-3	BMP2K	x	0.660633	1.14224	0.935622	1.01818	0.87291	1.08	0.691358	1.20385	1.21765	1.12304	0.932914	1.38462	0.986486	1.23109	0.953795	0.848341	1.08936	1.00847	1.0283	1.06838	0.813433	0.905882	0.792285	0.863354	0.717949	2.63298	0.807377	1	1.38837	1.00911	0.619048	1.2446	1.05634	0.862338	0.704615	0.936321	0.817797	1.12871	0.77027	1.34756	0.854271	1.1495	1.44512	0.844221	1.60797
BMP2K-4	BMP2K	x	1.29762	0.958763	0.769231	0.729412	0.82716	1.03226	0.541096	1.01613	0.678571	0.642276	1.20497	1.03419	0.9	1.41026	1.29825	0.773913	0.519231	0.412281	0.536585	0.493506	0.6375	0.546218	0.484536	1.01316	0.529801	0.988636	0.638462	1.37226	1.27068	0.905109	1.34783	1.31132	1.625	0.5	0.712871	0.628571	1.06849	0.857143	0.987013	0.640777	0.621622	0.838983	0.330097	1.33514	0.771186
BMP2K-5	BMP2K	x	0.780022	0.822402	0.806029	0.850422	1.04862	1.12735	1.17089	0.706024	0.840359	0.829918	1.03172	1.15852	1.17273	0.920732	1.03404	0.865546	1.01037	0.826772	0.988079	1.20657	0.967405	0.96518	0.798569	0.969356	0.897644	1.70159	0.884124	1.05552	0.93232	1.14475	0.667781	1.0582	0.905048	0.967364	0.969049	1.17457	1.10425	1.25137	1.16807	1.30106	0.932917	1.1323	1.42694	1.23089	1.00773
BMP2K-6	BMP2K	x	1.39695	0.629252	0.64	1.1674	0.810997	1.17222	0.692073	1.38434	1.92245	0.821522	0.680761	0.84858	0.620818	1.14976	0.705298	0.530303	0.853047	0.761261	0.658416	0.616822	0.759358	1.16013	0.697987	0.656347	0.642534	0.589124	0.495283	0.653846	1.15476	0.76738	1.34568	1.28049	0.907631	1.14726	1.0106	0.938547	0.786047	0.812766	1.01896	0.851301	1.27809	0.912458	1.26766	1.50843	0.925926
BMP2K-7	BMP2K	x	1.12193	0.975828	1.70631	1.03399	1.02259	0.994158	1.19773	1.15616	1.08794	1.32115	0.922899	1.0681	1.26489	1.14347	1.13047	1.42063	0.969063	0.933913	1.09738	1.16937	1.10697	1.01095	0.997541	0.900626	1.32622	0.992872	0.858053	1.24464	1.08126	0.956984	0.810987	0.915929	1.15679	1.00932	0.967825	1.09985	0.982828	1.01283	0.851297	0.89159	1.13395	1.03501	0.762155	0.926218	1.01651
BMP2K-8	BMP2K	x	0.620462	0.866667	0.494545	0.644737	0.773756	0.605263	1.18333	0.628993	0.836842	0.882353	0.66	1.17135	1.0913	1.032	1.01079	0.972973	0.690763	0.840426	0.50519	0.452261	0.721649	0.535593	0.601423	0.492063	0.688385	0.438953	0.763021	0.950472	0.70935	0.971717	2.01515	0.958188	1.26647	0.858824	0.940397	0.732194	1.28992	0.565574	0.892019	0.417526	0.808219	0.694236	0.595361	0.263699	0.458647
BMP2K-9	BMP2K	x	0.81087	0.911628	1.02644	1.15099	1.03636	0.807963	0.835871	1.14419	0.739479	1.09717	1.0067	0.92587	1.02192	1.43902	1.21185	0.634383	0.82287	0.761273	0.542117	1.23881	0.71789	0.755769	0.850694	0.992366	1.32857	0.768352	1.20935	1.00432	1.03263	1.09819	1.54916	1.07761	1.28261	0.937598	1.08379	1.2133	0.880711	1.09396	0.817232	0.747899	1.06522	0.753817	0.727731	0.663043	1.19656
BMPR1A-1	BMPR1A	x	0.467354	0.371336	0.607973	1.01408	0.689769	0.767918	0.366477	0.419525	0.26393	0.376623	0.301205	0.200946	0.386139	0.47352	0.852601	0.192308	0.185976	0.187943	0.396552	0.252137	0.203085	0.744444	0.668258	0.674479	0.41791	0.819188	1.08479	1.09693	0.959732	0.737069	0.603846	0.759184	0.448669	1.03854	0.711755	0.531303	0.603306	0.478764	0.701961	0.282686	0.317003	0.164706	0.24735	0.302594	0.364706
BMPR1A-10	BMPR1A	x	1.01572	1.28831	1.10909	0.884268	0.998179	1.06729	0.77492	0.61437	0.828231	0.987358	0.872038	0.997452	0.823988	0.915698	1.12521	0.56262	0.75	0.318182	0.974155	0.867089	0.694245	1.1847	1.04637	1.16905	1.05378	1.07641	0.793187	1.50535	0.946199	1.10401	0.963947	0.309654	0.591463	1.12334	0.908858	1.17984	0.92233	0.872211	1.09544	0.473029	1.21045	1.08087	0.456432	0.714925	0.729393
BMPR1A-2	BMPR1A	x	0.701493	0.510638	0.546875	1.25	0.689655	0.479167	0.383333	0.617647	0	1.08889	2.66667	2.18182	0.655738	0.446429	0.826087	0.46875	0.560976	0.555556	0.592593	1.7931	0.791667	0.758065	0.736842	0.796296	0.266667	1.35088	1.65625	1.20408	0.296296	0.153846	0.64	1.02632	0	2.46512	1.55556	2	1.22917	1.08	1.11364	0.0196078	1.48837	0.046875	0.117647	2.37209	0.015625
BMPR1A-3	BMPR1A	x	0.673716	0.949074	0.64939	0.950151	0.910596	0.885449	0.625	0.76885	0.88785	0.71093	0.704885	0.781022	0.709766	0.752187	0.867624	0.479428	0.56964	0.472028	0.545603	0.580595	0.570962	0.901282	0.832736	0.799729	1.64179	0.614248	1.15701	1.04265	1.39961	1.03521	0.857143	0.765468	0.977124	0.97665	1.1556	1.08511	0.721223	0.881295	1.00523	0.514509	0.398455	0.767779	0.873884	0.355408	0.693759
BMPR1A-4	BMPR1A	x	0.904762	1.27053	0.641304	0.91	0.794258	1.00529	0.927336	0.992395	0.832	0.919014	0.747788	1.15476	1.39412	0.769585	0.845815	0.400966	0.446352	0.552381	0.708333	0.644809	0.345	1.27049	1.06944	1.37333	0.596774	1.01562	0.580769	1.17175	1.04155	1.34062	0.227119	0.354962	0.19883	1.73488	0.89527	0.799257	0.908696	0.935323	0.857143	0.744048	0.609244	0.582677	1.00298	0.533613	0.606299
BMPR1A-5	BMPR1A	x	0.774697	1.0502	0.86055	0.681132	1.28345	1.11724	0.888889	0.85567	0.844961	1.47181	1.33333	1.35978	1.15426	1.26829	1.2476	0.49692	0.400383	0.597015	0.471783	0.350365	0.328859	1.18421	0.773554	1.17018	1.18134	0.626826	0.705691	1.26152	0.977477	1.05837	1.0985	0.665448	0.853195	1.03811	0.915737	1.27598	0.741648	0.978469	0.914425	0.576705	0.512864	0.382775	0.196023	0.356775	0.285486
BMPR1A-6	BMPR1A	x	0.91657	1.29483	0.862069	1.01457	0.920253	0.840358	0.849566	0.967183	1.38865	0.802143	0.717647	0.976644	0.903106	1.14849	0.74375	0.830874	0.612296	0.657534	0.737864	0.661823	0.933232	1.08371	0.991853	0.941675	1.27492	0.898109	1.03044	1.17158	1.04204	1.08443	0.690123	0.650976	1.25721	1.02769	0.805214	1.33574	0.912607	0.789765	0.734143	0.925563	0.644773	0.651529	0.912831	0.651249	0.402224
BMPR1A-7	BMPR1A	x	0.761364	1.18229	0.717391	0.650382	0.790244	0.799353	0.324242	0.208499	0.279373	0.477895	0.667494	0.635061	1.20149	0.753153	0.594595	0.172352	0.342513	0.313208	0.418018	0.386555	0.337972	1.375	1.07746	1.06658	1.07516	1.01167	0.790029	1.10104	1.17647	1.15141	0.572391	1.44179	0.658247	1.00971	1.08922	1.07564	0.787022	0.797872	0.775701	0.445545	0.375	0.224462	0.252475	0.333333	0.111559
BMPR1A-8	BMPR1A	x	0.680982	0.977124	0.529801	0.78882	0.774194	1.09061	0.928421	0.985201	0.892157	0.798333	0.73535	0.982379	0.944954	0.545226	0.863524	0.690722	0.789634	0.901361	1.22909	0.625378	0.81203	0.768398	0.91841	0.816471	1.91684	1.35152	1.30372	0.935065	1.36484	1.01406	0.759494	0.610592	1.37624	1.1322	0.770492	0.869245	0.679245	0.633663	1.0386	0.743842	0.316901	0.353755	0.564039	0.169014	0.620553
BMPR1A-9	BMPR1A	x	0.917949	1.1746	1.33505	0.365854	0.771574	0.769608	0.43913	1.22727	0.588015	0.807407	0.455927	0.610714	0.842342	0.693467	0.970588	0.404908	0.466667	0.396985	0.163265	0.248521	0.298246	0.752768	0.517123	0.739726	1.18592	1.3125	0.717608	0.724382	1.07975	0.961877	0.564103	0.792271	0.913462	0.883191	1.05102	0.776	0.720238	0.843023	0.595376	0.300493	0.0948905	0.505495	0.305419	0.317518	0.644689
BMPR1B-1	BMPR1B	x	1.01202	1.38081	1.08516	1.10191	1.05822	1.09508	1.02103	1.02254	1.13677	0.971239	0.858696	1.21174	1.27119	1.06045	0.935028	0.926396	1.05764	1.10826	1.41615	1.35926	1.24296	1.33684	1.37297	1.0771	0.728774	0.876457	1.18919	0.930984	0.990164	1.05338	1.27684	1.71293	1.14175	1.9052	1.07521	1.35523	0.975207	1.18182	0.957983	1.19238	0.735656	0.982222	1.01202	0.764344	0.922222
BMPR1B-10	BMPR1B	x	1.00514	1.05496	1.05791	0.991781	0.838951	0.78526	1.34519	1.00642	1.62629	1.00924	1.23555	1.33966	0.93253	1.07061	1.22193	0.969697	1.15111	1.17931	0.662562	0.840999	0.72973	0.992465	1.07799	1.18964	1.22744	1.66591	0.688391	0.985197	0.982285	0.925585	1.49618	1.16454	1.34282	1.04386	1.29845	0.822917	1.07119	0.824759	1.00341	1.05424	1.11195	1.05556	1.34024	0.994618	1.13232
BMPR1B-2	BMPR1B	x	0.868041	1.14505	0.728285	0.930804	0.720621	0.74645	0.903581	1.29167	0.934959	0.844941	0.985896	0.973529	0.882353	0.77234	0.909774	1.04979	0.662028	1.00208	0.621978	0.621951	0.806971	0.815409	0.881356	0.966132	1.26126	1.01533	1.62338	0.778029	0.915365	0.896679	1.08081	0.763975	1.15323	1.05285	1.09791	1.07418	0.837379	0.945652	0.895141	0.975482	0.704319	1.26697	1.27145	0.865449	1.05882
BMPR1B-3	BMPR1B	x	0.896926	0.917492	1.31127	0.984563	1.29586	1.08752	1.37252	0.817265	1.46006	1.29625	1.53018	1.25515	0.950893	1.25427	1.28473	1.26852	1.15236	0.981481	0.919499	1.09393	1.07327	1.3006	1.17553	0.944	1.08213	1.15906	1.50661	0.99893	0.912863	1.21429	0.84472	1.18258	0.662687	1.03575	1.19191	1.13477	1.01378	0.8083	0.930769	1.09479	1.68293	1.56962	1.15877	1.63008	2.74557
BMPR1B-4	BMPR1B	x	0.809135	0.942699	1.23529	0.97913	0.84	0.896494	1.08901	0.873659	1.19854	1.05459	1.04167	1.06043	1.07774	0.82994	0.663915	1.13519	1.02256	0.944068	1.0631	1.03315	1.20412	1.26145	0.809045	0.890446	0.681598	1.80645	0.681651	0.845036	0.962607	0.842602	1.88068	1.23422	1.17778	0.980334	0.864724	1.08524	1.24587	1.03333	0.762677	1.56975	1.04875	0.650773	1.80443	0.840666	0.641753
BMPR1B-5	BMPR1B	x	0.850275	0.777027	0.770756	1.03182	1.07317	0.990291	0.919321	1.04476	1.22248	1.1377	1.14877	1.18818	1.25356	1.22449	1.0935	1.13729	1.02564	1.2496	1.15182	1.19516	1.03397	1.3192	1.05629	1.04188	1.3368	1.27294	0.645303	1.18937	1.08867	1.42754	1.05991	1.27043	0.868874	1.1404	1.36415	1.51465	0.861199	1	1.06879	1.62527	1.03934	0.921891	1.75604	1.03934	0.882837
BMPR1B-6	BMPR1B	x	1.04091	0.938776	1.54222	1.0739	1.17045	1.20417	0.80988	1.62311	0.933014	1.3084	1.07368	1.36527	0.928814	1.09317	1.1528	0.985417	1.2981	1.05941	1.26712	1.19342	1.05273	1.27608	1.18593	1.125	2.4498	1.30189	0.852288	0.783626	0.937282	1.11881	1.10897	0.826722	0.803846	0.803488	1.3119	1.62415	1.30833	1	1.17476	1.05995	1.23167	1.40728	1.16621	0.975073	1.58113
BMPR1B-7	BMPR1B	x	0.683391	1.38267	1.10208	0.973684	1.05451	1.18214	1.30682	1.25196	0.897252	1.084	1.33687	1.27562	0.866165	1.2996	0.970356	1.17354	1.06239	0.977011	1.52103	1.36008	1.38066	1.05318	1.78456	1.48705	0.972488	1.85176	1.3834	0.972589	1.04912	1.12959	0.519263	1.14855	0.788871	0.905117	0.868815	1.36637	1.37575	1.40385	1.1161	1.11701	1.4359	1.24129	1.09932	1.28205	1.2929
BMPR1B-8	BMPR1B	x	0.634675	0.872063	1.28307	0.668033	0.756824	0.810502	1.32026	0.863118	1.01616	0.928047	0.838323	1.05738	0.821918	0.739437	1.06234	1.03715	0.783163	0.843478	0.787879	0.985632	0.72549	1.04904	0.938224	0.674	1.75	0.821124	0.792941	0.962633	1.09736	1.07419	0.992974	0.994152	1.21788	1.02582	1.16966	1.12324	0.897361	0.746795	0.922857	0.688285	1.10516	0.923225	0.702929	1.40535	1.33397
BMPR1B-9	BMPR1B	x	0.735294	1.0044	0.865979	0.805769	0.852883	0.936575	1.46654	1.1068	0.745042	0.828536	0.785333	0.914685	0.801181	0.75082	0.662813	0.810101	1.21692	1.17489	1.27688	0.847584	0.987531	0.813272	1.07063	0.956391	0.88589	1.8819	2.62712	0.775633	0.895086	1.02354	2.89165	0.861432	1.66957	0.99162	1.32132	1.41757	0.938215	1.04557	1.2406	0.654341	0.818722	1.16267	0.602894	0.860327	1.20034
BMPR2-1	BMPR2	x	1.07857	1.18727	1.34507	0.991597	0.675676	0.730897	0.373418	0.902685	1.03022	0.591518	0.667421	0.637755	0.637195	0.765487	0.592058	0.206751	0.282258	0.325203	0.211538	0.345622	0.395105	1.09434	0.844985	0.755319	0.282209	1.29957	0.99511	0.756385	0.83878	0.937947	0.928571	1.56747	0.926941	0.987654	1.43539	1.11236	0.952586	0.470339	1.08036	0.517413	1.31157	0.965426	0.465174	2.51335	1.09574
BMPR2-10	BMPR2	x	1.20478	1.01479	1.54098	0.792899	0.818462	0.661499	0.308489	0.41055	0.695464	0.688596	0.75	0.775862	0.535817	0.689873	0.920415	0.295918	0.615686	0.207283	0.267857	0.273616	0.346535	0.66147	0.78271	0.618605	0.526786	0.587248	0.278656	1.01518	1.03198	0.711927	1.03715	0.513605	0.862676	0.897661	0.926773	0.990602	0.714286	0.683636	0.811765	0.450106	0.321995	1.03628	0.388535	0.190476	0.655329
BMPR2-2	BMPR2	x	1.48525	1.07143	0.738255	0.888235	0.81044	0.918367	1.021	1.06704	0.736973	1.03341	0.956341	0.635621	0.819706	0.983287	0.634615	0.230769	0.310651	0.135693	0.639576	0.645902	0.600707	1.08791	1.04235	1.31522	0.791111	0.705882	0.948655	0.731034	0.990859	0.841304	1.43917	1.2064	0.961446	0.98835	1	0.905473	0.633117	0.592105	0.421212	0.815054	2.70398	1.03968	1.17204	5.31841	0.891534
BMPR2-3	BMPR2	x	2.07109	0.891626	0.606796	1.00503	1.27174	0.99005	0.869048	0.96875	0.6375	1.38843	1.12955	1.04118	1.03478	0.665323	0.511416	0.0991379	0.159483	0.311628	0.559783	0.403941	0.237885	0.84585	1.18421	1.34902	0.393939	1.34818	0.530792	1.29217	0.920732	1.03491	1.33579	1.4632	1.34536	1.16206	1.70423	0.924444	0.969136	0.717172	0.751196	1.41146	0.976119	1.01812	1.10156	1.17015	0.753623
BMPR2-4	BMPR2	x	0.626464	0.922604	0.864315	0.910256	0.746424	0.904441	0.562914	0.577132	0.598478	0.933267	0.630546	0.846503	0.622665	0.696629	0.917355	0.267003	0.357836	0.243733	0.343624	0.207108	0.324324	0.907921	0.899396	1.0343	1.14486	0.769313	0.916388	0.785174	0.801775	1.04503	0.633842	1.02817	1.43829	0.712569	1.13744	0.790353	0.518797	0.657475	0.592068	0.889107	0.782779	0.829051	1.42983	0.622309	0.608696
BMPR2-5	BMPR2	x	1.10141	0.745165	1.25504	0.980796	0.856201	0.860636	0.851026	0.57001	0.804243	0.950406	0.739955	0.960413	0.778436	0.804062	0.866592	0.346304	0.228534	0.284826	0.337589	0.367989	0.361006	1.0431	0.987603	0.893443	0.755533	1.11306	0.733077	0.966317	0.871736	1.00383	0.648352	0.878863	0.801653	1.08532	0.966637	0.888889	0.980501	0.766234	0.81997	1.01545	0.987511	0.835655	0.936481	0.914362	0.779944
BMPR2-6	BMPR2	x	0.772348	1.09128	1.05425	1.09934	0.986894	1.1123	0.549812	0.912907	0.789417	0.960993	0.85087	0.907971	0.818182	0.768722	1.02976	0.618158	0.473973	0.414765	0.935484	0.667127	0.659634	1.02938	0.946855	0.918049	0.694726	0.646078	0.65368	1.07319	0.985992	1.26544	0.733249	0.912329	0.860645	0.877049	0.751026	0.976096	0.882637	0.771137	0.771067	0.841901	0.651367	0.712451	0.666343	0.631836	1.13834
BMPR2-7	BMPR2	x	0.778711	0.95189	0.524242	1.07054	0.866109	0.837121	0.388095	0.416452	0.898876	0.461749	0.627907	0.713959	0.55627	0.563694	0.560241	0.270677	0.146417	0.207547	0.246862	0.522613	0.233553	0.730205	0.626703	0.607143	0.448567	0.430556	0.878628	1.04175	0.772296	1.16309	1.21961	0.962963	2.17576	0.734491	1.16519	0.882952	0.839844	0.692308	0.78481	1.00518	0.661728	0.741206	0.909326	0.434568	1.05528
BMPR2-8	BMPR2	x	0.885204	0.96347	0.608501	1.00448	0.855478	0.958237	0.906796	0.37193	0.746212	0.846614	0.760067	0.779197	0.522026	0.791667	0.596639	0.129032	0.131646	0.135484	0.284123	0.224256	0.298153	1.16068	0.949533	0.683478	0.772009	0.930894	0.809816	1.06686	0.798859	1.05365	1.42	0.997543	1.53316	1.22484	0.960976	0.949458	0.761062	0.56546	0.840336	0.808725	1.39525	0.780105	0.924497	1.527	1.28621
BMPR2-9	BMPR2	x	1.29808	1.36313	1.13966	0.791111	0.972222	1.23556	1.40183	1.42712	1.08333	0.939759	1.4691	1.25562	1.25991	1.30417	1.41315	0.978723	1.15862	1.59589	1.49261	0.937198	1.66071	1.18771	1.50181	1.12102	1.78065	1.26537	2.26861	1.24731	1.14029	0.835443	2.56115	0.391667	0.683544	1.51254	1.62937	1.74205	1.88148	1.55882	1.51049	0.636364	1.13131	0.319853	1.0751	1.10774	0.319853
BMX-1	BMX	x	1.31137	0.696594	1.27797	1.21524	1.02841	1.18726	0.753585	1.46318	1.36164	1.31105	1.22762	1.22049	2.2739	1.33271	1.15214	1.07781	0.980322	1.07611	1.26733	1.12287	1.24	1.02853	1.64654	1.40968	0.919802	0.925373	1.70111	1.16867	1.11285	1.0324	1.96422	0.998124	1.28974	1.02752	1.65176	1.32171	1.50097	1.23004	1.23194	0.667874	1.09463	1.39806	0.478261	0.769774	1.60194
BMX-10	BMX	x	1.81818	1.42915	0.751037	1.03114	1.51415	0.888889	1.62411	0.938776	1.17301	1.31415	1.97527	1.56579	0.76875	0.596825	1.33588	0.731225	1.13439	0.895161	1.78307	1.1502	1.39196	0.966851	1.35789	1.18129	2.13187	0.800448	1.47851	1.39459	1.05314	1.2019	3.89691	1.67083	0.450172	1.16898	0.820663	1.29333	1.33772	1.12444	1.55051	0.887789	1.03371	1.07143	0.709571	1.01966	1.48286
BMX-2	BMX	x	1.05397	1.08498	0.878089	0.954474	1.1913	1.13433	1.09703	1.2133	1.06195	0.976679	1.24642	1.17278	0.928473	1.32558	1.13924	0.956454	1.12617	1.5653	1.34024	1.16613	1.19891	1.34431	1.20499	1.46787	1.10391	1.62336	1.4832	1.03244	0.98528	1.15854	1.02418	1.12154	1.20428	1.34459	1.54509	1.16205	1.34062	1.1891	1.39153	1.14954	0.807568	0.906509	1.04795	0.948108	0.726627
BMX-3	BMX	x	1.03282	0.789731	1.49635	0.940659	1.01655	1.08	1.00511	1.62763	0.93554	1.20393	1.09379	1.31053	0.706693	1.40774	0.971667	1.16092	1.00244	1.41867	1.23282	1.51989	1.07824	1.24956	1.86833	1.17114	1.27375	1.18972	1.1172	1.10169	0.95122	1.34233	0.803874	0.651852	0.758883	1.03448	1.43206	0.850917	1.4349	1.36316	1.19841	0.69174	0.731993	1.02822	0.653392	1.44221	1.15168
BMX-4	BMX	x	1.13293	1.46267	0.910903	1.14646	1.18483	1.16168	1.00212	0.991361	1.2381	1.33551	1.24359	1.17021	1.12757	0.996324	0.918015	1.18595	1.47552	0.911538	1.69582	1.20084	1.05	1.12363	1.63117	1.16933	1.44565	1.41731	0.940018	1.17552	0.957028	0.998381	1.04213	1.4434	1.04134	1.08489	0.93572	1.17902	1.19825	1.22272	1.02035	0.905967	0.827513	1.10646	1.19711	0.797884	1.12357
BMX-5	BMX	x	1.07263	0.826159	1.63225	1.21181	1.18164	1.0778	1.1958	1.07397	1.57226	1.18217	1.01347	1.39001	1.55717	1.5498	1.62754	1.59537	1.38347	1.23077	1.62687	1.33025	1.575	1.52824	1.56528	1.17195	1.14363	1.15906	0.872263	1.10072	1.12879	1.27444	1.61524	4.33681	1.70209	1.04005	1.22353	1.10233	1.25253	1.47732	1.48682	1.35531	1.28649	1.25648	1.24116	1.09054	1.46244
BMX-6	BMX	x	0.635115	1.30298	0.981679	1.0711	0.900651	0.932897	0.96071	1.00546	1.03234	0.836957	1.34742	0.95	1.05657	1.43355	1.13405	1.17263	0.96467	1.11794	0.94636	1.31034	1.13661	1.23537	0.997379	1.15148	1.47404	1.17753	1.07394	1.11167	1.19515	1.13022	1.18053	0.790816	0.66069	1.01194	1.11245	0.922126	0.982692	1.21264	1.21521	0.777209	0.767857	1.63659	0.516005	0.757653	2.02541
BMX-7	BMX	x	1.05571	1.43164	1.36244	1.2093	1.11652	1.10872	1.23461	1.12416	0.900336	1.21828	1.47427	1.48431	1.21345	1.25718	1.07286	1.41422	1.13065	1.21618	1.62396	1.46815	1.60065	1.31567	1.31628	1.40286	1.1619	1.73208	1.29039	0.996337	1.1127	1.04113	1.5283	1.99833	0.91763	1.14939	1.08319	1.22072	1.4164	1.19967	1.48776	1.24886	1.12311	0.70078	1.39886	1.09719	0.747563
BMX-8	BMX	x	1.32779	1.19733	1.35507	0.970464	1.07356	1.32933	0.667992	1.03052	1.18233	1.29818	0.963397	1.37368	1.08725	1.38404	0.890135	1.14141	0.887179	1.125	1.27296	1.12533	1.41369	0.961315	1.20309	1.58856	1.11057	0.571219	1.47619	0.868035	1.0546	1.20384	1.00955	0.871681	1.09358	1.7404	1.40782	0.981572	1.42903	1.03723	0.766304	0.938144	1.14557	0.820037	0.47079	1.36498	0.909091
BMX-9	BMX	x	1.53058	1.35126	1.06061	1.13369	1.2522	1.23498	1.44593	1.01475	1.14268	1.5708	1.48904	1.25271	1.57143	1.40541	1.22284	0.855346	1.35315	1.40939	1.32484	1.45173	1.56964	1.23128	1.25417	1.68429	1.90934	1.10498	2.0709	1.33109	1.02575	1.48894	0.856655	1.52553	1.1992	1.32535	1.37184	1.19709	1.65125	1.75522	2.08351	1.02733	1.09547	1.34401	1.19379	1.3031	1.50696
BRAF-1	BRAF	x	1.49471	1.85864	1.35215	0.872576	0.876833	1.18373	0.904167	1.53465	0.959821	1.18936	1.25893	1.27495	1.26997	1.03245	1.38281	0.89557	0.82659	1.05419	1.11006	1.04138	1.00568	0.655779	0.858491	0.567347	0.0636943	0.196809	0.349206	1.33144	1.28571	1.02109	0.727869	1.03571	0.677019	1.07286	0.93617	0.70625	1.19188	1.05292	0.827362	0.48893	0.592157	0.901747	0.297048	0.2	0.975983
BRAF-10	BRAF	x	1.07814	1.36121	0.979592	0.907975	0.8	0.821656	0.662018	0.901522	0.749585	1.20133	1.17785	1.32152	1.13385	1.14081	0.992949	0.998726	0.948394	1.08313	1.21836	1.34527	1.1745	0.630621	0.643821	0.733191	0.077472	0.0186741	0.0344468	1.08402	1.2314	0.871438	0.496606	1.22831	0.557711	0.209576	0.21921	0.204746	1.50545	1.52185	1.41055	0.877607	1.06124	0.728242	0.743427	1.28519	0.601243
BRAF-2	BRAF	x	1.52941	0.753623	0.713333	0.80814	1.17361	0.919192	0.857988	0.820388	0.845361	1.23392	0.794239	0.726962	0.751295	1.25414	1.36932	0.550336	0.972603	0.594059	0.723164	0.905556	0.711207	0.465517	0.768519	0.662602	0.0352423	0.0551181	0.489691	0.556561	0.971774	0.72963	1.03361	1.07692	1.02098	0.753968	0.32716	0.357827	0.542373	0.958678	0.977778	0.495726	0.511848	0.249057	0.299145	0.241706	0.120755
BRAF-3	BRAF	x	1.05386	0.827664	1.45125	1.17766	0.823899	0.958159	0.896175	0.801887	1.2735	0.978979	1.60135	0.97553	1.12896	1.40509	0.963265	1.02216	0.785219	0.969095	1.08717	1.27224	1.07356	0.504188	0.839851	0.482549	0.274194	0.445876	0.184704	1.07438	0.661312	0.880597	0.479592	0.445333	0.847594	0.56478	0.480278	0.891652	1.50919	0.977427	1.29661	0.661458	0.541732	0.81862	0.690972	0.355906	0.731942
BRAF-4	BRAF	x	1.40758	0.972603	0.970149	1.22335	1.24064	1.13592	1.38571	1.54634	1.61889	1.15385	0.953947	1.18702	1.14286	1.33019	1.63125	1.07609	1.12273	0.678571	1.51648	1.71429	1.42759	1.13514	0.800664	1.13158	1.35829	0.772093	0.834437	1.11905	1.13793	1.10433	0.723404	0.597156	1.62567	0.865979	1.3434	1.51172	1.85	1.38971	1.9593	1.4439	2.28814	2.16154	0.980488	2.75593	1.80769
BRAF-5	BRAF	x	1.3067	1.32133	1.29555	1.07303	0.987887	0.957419	0.885216	1.04318	0.921505	1.04211	0.835285	0.917893	0.976886	1.54035	1.31612	0.954479	1.16361	1.10172	0.954368	1.16802	0.929889	0.818637	0.789234	0.835835	0.153916	0.0608035	0.276364	1.06302	1.05867	1.0408	0.707768	0.718706	0.848301	0.596675	0.579966	0.689189	0.958333	0.956276	0.918877	1.05487	1.06231	0.906814	1.21429	0.968847	0.794589
BRAF-6	BRAF	x	1.05755	1.47228	1.45359	1.12827	1.42708	1.22466	1.15168	1.18403	1.42004	1.41468	1.45873	1.34206	1.3118	1.34243	1.18141	1.06164	0.964912	1.08122	1.68523	1.49874	1.2796	1.4262	1.08	1.14808	0.8	0.954142	1.09517	1.11927	0.776097	1.15964	1.21698	1.26432	1.34536	1.07438	1.17018	1.13445	1.33141	1.16814	1.21902	0.975758	1.45891	0.806402	1.0197	0.928682	0.879573
BRAF-7	BRAF	x	1.33761	0.95188	1.17511	0.949698	0.872611	0.673684	1.12965	0.879144	0.910714	1.13223	1.09045	0.894634	1.32489	0.741531	1.19448	1.01911	0.755072	0.626703	1.06551	1.10097	1.11205	0.651762	0.618065	0.722925	0.122977	0.116368	0.171282	1.37265	0.981728	1.12808	0.364146	0.901266	0.604828	0.56721	0.653846	0.593312	1.17722	1.6102	1.47395	0.896928	0.62513	0.817227	0.999009	0.603323	0.789916
BRAF-8	BRAF	x	0.775726	0.974425	1.07179	0.98801	0.992974	1.05263	0.371795	0.777164	0.934211	1.08244	1.03492	0.946319	1.22588	1.38235	1.04104	0.765013	0.552311	0.559441	1.20909	1.02133	1.256	0.534173	0.522686	0.827214	0.0560272	0.113734	0.0953895	1.02888	1.07443	0.920368	0.689737	0.511211	0.466488	0.531516	0.586879	0.45938	0.939394	1.09167	0.776836	0.905132	1.04528	1.08173	0.948678	1.09057	1.39663
BRAF-9	BRAF	x	1.04511	0.962521	0.965461	0.692029	0.804183	0.922939	0.53701	0.745739	0.802557	1.4723	1.04407	0.979737	1.0416	1.02871	1.21266	0.646123	0.980159	0.526221	0.825342	1.16094	0.940594	0.613489	0.541783	0.529494	0.0495575	0.0640114	0.0477612	1.16532	1.01648	0.884729	0.461694	0.667838	0.735043	0.263158	0.294726	0.259563	1.31849	1.13786	0.918864	0.596026	0.761175	0.946133	0.760265	0.790549	1.13398
BRSK1-1	BRSK1	x	0.706767	1.02353	0.892216	1.07654	1.19333	0.811791	1.44223	0.959911	1.07982	0.755319	0.868787	0.870504	1.01124	1.12613	0.821192	0.809384	1.0636	0.889213	1.46984	1.29066	1	0.912037	0.882	0.969008	0.729358	0.685649	0.740876	0.796763	1.13941	0.906475	0.886076	0.751366	1.03591	0.967466	0.793789	0.704545	1.36585	1.0463	1.33455	1.75698	0.923251	1.84634	1.2486	0.819413	1.25059
BRSK1-10	BRSK1	x	0.580135	0.622276	0.512941	1.07742	1.02642	1	1.27797	1.28098	1.02648	0.560549	0.630705	0.526549	0.981289	0.945205	0.898467	0.945	1.04	0.837067	0.850667	0.624217	0.824121	1.06641	0.875433	0.926667	0.62986	1.36667	0.923841	0.809264	0.805412	0.895833	0.654185	0.817942	0.778399	0.863271	0.826562	0.843293	0.626289	0.649874	0.49642	0.636704	0.804422	1.20085	0.683521	0.977891	0.92389
BRSK1-2	BRSK1	x	0.92389	1.05695	0.915033	0.986792	1.10994	0.984158	1.41707	1.17053	1.96552	1.35247	1.12386	1.10891	1.20578	0.789096	1.42407	1.20174	1.3978	0.660714	1.16157	0.900398	1.0364	1.19714	1.06842	1.12398	0.69437	0.667793	1.31039	1.37298	1.10737	1.29645	1.07219	1.19762	1.33929	1.25835	1.05976	1.00994	1.12121	0.835443	1.13568	1.05362	0.830532	1.52641	0.801449	1.01401	1.03169
BRSK1-3	BRSK1	x	1.0695	1.61686	1.75102	1.23506	0.971264	0.965839	0.9625	1.41341	1.59864	1.14807	0.976364	1.3838	1.22388	0.558313	0.874598	0.852941	1.27331	1.2259	0.892193	1.28163	1.01068	1.20175	0.980247	1.39466	1.23971	2.86923	1.00519	1.4145	1.09557	0.84749	1.25552	1.32203	0.818182	0.786127	0.710762	0.857143	0.987288	0.912752	1.06635	0.750611	0.8125	0.589806	0.623472	0.721983	0.949029
BRSK1-4	BRSK1	x	0.847512	0.933194	0.854895	0.854386	0.805648	0.8736	1.50983	1.18732	1.44796	0.943237	0.819302	0.917021	0.762238	1.4273	1.22308	0.824324	0.826742	1.17717	1.09159	1.00542	0.929915	0.934297	0.787234	0.893939	0.902464	0.985816	0.764532	0.864253	0.896976	1.17406	0.624561	1.20228	0.788427	1.0292	0.957678	0.944072	0.83691	1.03037	0.89002	0.810298	0.8425	0.966755	0.96748	1.09875	1.0359
BRSK1-5	BRSK1	x	0.956633	0.886076	0.803838	0.898851	0.924171	0.87822	1.6	1.3466	1.32619	0.609375	0.811239	1.10273	1.16898	1.02603	0.63227	1.15135	0.997143	0.780822	0.767016	0.900804	0.767554	0.854779	0.858921	0.575758	0.563218	1.13347	1.27467	1.25248	1.47887	1.01357	1.17927	0.489051	0.71267	0.795129	0.728155	1.15683	0.936	0.906915	1.00576	1.27197	0.850379	1.05279	1.35323	0.852273	0.916422
BRSK1-6	BRSK1	x	1.29909	0.725131	0.908397	0.906158	0.993769	1.07458	1.38795	1.00415	1.22991	0.983271	0.843058	0.753982	0.989333	1.33025	1.27247	0.730458	0.801829	0.802632	0.823699	1.40345	1.0117	0.880174	1.09442	1.33862	0.624214	0.990403	1.30986	0.832536	1.19366	0.964856	0.544928	0.701571	1.26684	0.798768	0.993915	0.598651	0.803987	0.816609	1.1746	1.6137	1.3843	1.29318	1.73425	1.30165	0.959091
BRSK1-7	BRSK1	x	1.02077	0.945679	1.29977	0.932394	1.04075	0.966667	1.21162	1.79112	1.5	1.15869	0.829346	0.939671	0.692695	0.758242	0.967005	0.841823	1.02551	0.861035	1.03116	0.954545	0.748571	0.969484	0.750973	0.850549	0.862434	0.968208	0.667279	0.87728	1.06379	1.30713	0.751174	0.563452	0.543605	0.922101	1.05145	1.35616	1.01198	1.52265	1.18095	2.23261	0.83301	1.6891	2.40288	0.784466	2.03944
BRSK1-8	BRSK1	x	0.882119	0.897185	0.990385	1.13588	1.14627	1.10857	1.30541	1.20046	1.39602	1.0563	1.21853	0.965981	1.05984	0.996173	0.926952	1.45586	0.904636	1.24481	0.932584	0.987013	1.16179	1.0659	1.18931	1.18272	1.3042	1.68568	1.02596	0.825944	1.20073	0.98861	1.09489	1.33898	1.05198	1.08182	0.979185	0.975694	1.11603	1.03852	1.2292	0.851301	1.26002	0.89521	0.714684	0.863148	1.05988
BRSK1-9	BRSK1	x	0.818966	1.41449	0.563739	0.902857	1.26686	1.05556	2.04025	1.05906	1.1278	1.32777	1.15858	1.22826	1.07895	0.863753	1.30791	1.75646	1.11684	1.1746	1.40426	1.33117	1.3553	1.05983	1.13436	1.30024	1.60231	1.47544	1.4164	0.948718	0.977929	0.79566	1.27832	0.818182	0.917603	0.77561	1.39196	1.32192	1.08563	1.16883	1.18395	1.19643	0.65	1.43255	0.915179	1.16304	1.69593
BRSK2-1	BRSK2	x	0.615635	0.696364	0.621185	0.94198	1.1687	0.872865	1.00952	0.9344	1.20628	0.837617	0.917197	1.08895	1.10828	1.23471	1.38211	0.86444	0.673684	0.914449	1.21272	0.983968	1.25996	1.03752	0.980271	1.13815	1.19479	1.22591	0.865325	0.998879	0.930318	1.02288	0.574861	0.625448	1.15302	0.882415	1.23198	0.878514	1.12397	1.32688	1.10822	0.635117	0.468869	0.973118	0.9369	1.00508	1.35081
BRSK2-10	BRSK2	x	0.952782	0.826339	0.888218	0.976331	1.07184	1.17647	0.695804	1.10012	0.980526	0.967453	1.2081	1	1.31594	1.21848	1.04712	0.869986	1.3744	0.888724	1.19171	0.990654	1.14766	1.27111	1.38471	1.31106	0.858382	1.09568	1.58382	1.06435	1.1601	1.05503	1	0.874477	0.699029	1.12442	1.29167	1.28134	1.16469	1.53633	0.912052	0.714132	1.52332	1.05383	0.998921	2.36177	1.11387
BRSK2-11	BRSK2	x	1.64058	1.13521	0.903226	0.966321	0.923913	1.07123	0.812865	0.891784	0.828162	0.622928	0.962894	0.597843	0.966837	0.757225	0.821333	0.950464	0.645333	0.679245	1.03546	0.739583	0.557377	0.825792	1.23114	0.79	1.0262	0.864754	1.21627	1.05687	1.21731	1.32123	0.722992	0.466049	1.44072	0.95339	1.11261	1.28429	0.931271	1.04096	0.969349	1.04626	0.813417	1.00595	1.56167	0.823899	0.440476
BRSK2-12	BRSK2	x	0.684211	1.17801	0.622328	1.22196	1.0564	1.11674	0.837067	1.11682	1.25408	1.00426	1.19256	1.10469	1.29206	1.14659	1.00593	1.18234	1.16435	1.47077	1.53704	1.06416	1.07306	1.17745	1.41652	1.21947	1.27751	1.38813	1.63931	1.35404	1.17167	0.947811	1.21791	0.855228	1.4867	1.07826	0.841928	1.0763	0.890675	1.30421	1.04281	1.1848	0.964727	1.39114	0.696099	0.666667	1.12909
BRSK2-13	BRSK2	x	0.738462	0.795724	0.744292	1.06641	1.04104	0.969136	0.770344	0.490756	0.848148	0.604502	0.957447	0.631937	1.11151	1.38761	1.32554	0.814286	0.926437	0.954649	0.778291	0.7	0.823529	1.23394	1.26788	1.76874	1.22963	0.945578	0.63151	1.08486	0.983003	0.995798	0.786017	1.2276	1.53247	0.961367	0.865617	1.26079	1	0.82398	0.909574	0.981997	1.22419	0.90678	1.28969	0.608065	0.694915
BRSK2-14	BRSK2	x	0.800298	0.526929	0.716841	0.976153	1.16197	1.21635	0.772682	0.983648	0.799576	0.722325	0.896825	0.684211	1.49191	0.918605	1	0.868624	0.847134	0.940092	0.805505	1.1636	0.724026	0.955202	1.15775	0.776903	0.866466	0.664466	0.718412	0.956882	1.09296	0.915086	1.08554	0.764877	0.664384	0.888098	1.05223	1.03803	1.05415	0.908621	0.796029	0.851184	0.836506	0.63787	1.12965	0.75028	0.60355
BRSK2-15	BRSK2	x	0.929677	0.809748	1.14642	0.852814	0.760331	1.08057	0.774485	0.905495	0.723451	0.909558	1.03011	0.82737	1.09056	0.976852	0.929936	0.918782	0.934477	0.632893	0.889764	1.03737	0.767228	0.732609	0.773057	0.866983	1.04903	0.645251	0.687764	1.12874	0.864086	0.891709	0.684292	0.711921	0.942085	0.774775	0.945919	0.802941	1.05699	0.819596	1.05872	1.00448	1.15393	1.21646	0.869955	0.760917	1.14837
BRSK2-16	BRSK2	x	0.996689	0.892128	1.375	1.25632	1.17568	1.57388	1.16564	1.65775	1.50592	1.23186	1.25904	1.26368	1.1447	1.25	1.28329	1.33108	1.15888	2.08537	1.58537	1.58306	1.49575	1.35068	1.20971	1.53827	3.26667	1.61033	1.56083	0.807971	1.05323	1.53829	1.60687	1.19121	1.13477	1.13926	1.14894	1.40971	1.72103	1.42086	1.57721	0.849315	0.757303	2.44262	1.09132	1.00674	2.98595
BRSK2-17	BRSK2	x	0.814732	0.938338	0.643923	1.01476	0.840951	1.04508	0.978984	1.06126	0.688027	0.920485	1.07898	0.671937	0.914729	1.0865	0.849315	0.904018	0.987013	1.0504	0.960591	0.768692	0.817536	0.717252	1.16786	1.1044	0.872263	1.00725	0.99403	0.890228	1.4221	1.19305	0.990741	0.923596	2.01897	0.889186	1.21581	0.958445	1.11429	1.016	0.911168	0.754386	1.59574	1.70751	0.794258	1.20696	1.18577
BRSK2-2	BRSK2	x	0.777778	1.08621	0.814882	1.19277	0.85289	0.764811	0.74571	0.877437	0.92518	0.834688	0.911055	0.59194	1.49909	1.0275	0.982301	0.775322	0.822018	0.876569	0.783133	0.74942	0.690432	0.648773	0.796736	1.04574	0.463158	0.745962	0.672881	1.14947	0.849345	0.988506	1.03682	0.663158	0.510129	0.922009	1.15092	0.813102	1.03319	1.05425	1.20445	0.892749	0.779762	0.771261	0.55136	0.565476	0.59824
BRSK2-3	BRSK2	x	1.05481	0.928652	0.746725	0.974388	1.16912	1.1165	0.986388	0.74503	0.60459	1.17557	1.02954	0.863254	1.1329	0.844167	1.16815	1.21158	1.0078	0.871002	0.905897	0.892857	0.860902	0.978395	1.14567	0.95864	1.10723	1.21634	1.21961	1.08466	1.19717	0.967995	0.837995	1.19711	0.959764	1.11621	1.11328	1.33966	0.929268	1.13915	0.826291	0.78416	1.07171	0.739631	0.782419	1.00717	0.55914
BRSK2-4	BRSK2	x	1	0.865429	1.0558	0.887324	1.14663	0.904429	0.908507	0.869646	0.853053	0.801664	0.746032	0.809593	1.33867	1.38034	1.22921	1.45522	1.20804	1.14989	0.878104	0.761702	0.914358	1.35556	0.928196	1.56688	0.523098	1.47337	1.1241	1.3951	1.01845	1.41763	1.16838	1.65795	0.744275	1.35772	0.91465	1.12611	1.20899	1.3017	1.15065	0.68097	1.61672	0.863568	0.578358	2.01045	1.10645
BRSK2-5	BRSK2	x	1.02181	1.12428	0.784615	1	1.01917	1.03333	0.975057	0.661538	0.414254	0.887295	0.615942	0.522388	1.08421	1.03234	1.24092	0.922636	0.721254	0.710963	0.992218	0.625	0.87372	0.7507	0.678947	0.8	0.817822	0.850746	0.542373	1.15739	1.1288	1.4136	0.905956	0.781095	0.686684	0.996234	1.3925	1.25	0.996979	1.17508	1.0836	0.849372	0.614853	0.980349	0.715481	0.699482	1.33188
BRSK2-6	BRSK2	x	0.8	1.09957	1.25943	0.914847	1.159	0.822917	0.926335	0.729391	0.78341	0.849645	1.08081	1.1136	0.881874	1.14198	1.08989	0.917098	0.761658	0.747191	0.831409	0.947494	1.20155	1.04137	0.994652	1.03114	1.1079	0.727692	0.65894	0.850136	1.02008	1.25802	1.02273	0.592857	0.815725	1.12038	0.995185	0.849635	0.782927	0.802469	0.868852	0.962832	1.46063	1.46269	0.815929	1.44094	1.74067
BRSK2-7	BRSK2	x	0.717472	0.701299	2.08494	1.06084	1.25856	1.23214	1.08786	0.98806	1.12431	1.07576	1.23306	1.05425	1.06443	1.47718	1.11314	0.857143	0.673993	0.737778	1	1.25652	1.42692	0.84953	1.01072	1.30925	0.782946	1.1455	0.709821	0.59188	1.32407	1.59529	0.594796	2.41423	1.17788	0.909664	1.0401	0.898276	0.743083	1.0724	1.33621	1.06484	0.982801	0.867925	0.985037	1	1.20755
BRSK2-8	BRSK2	x	1.94867	1.4069	1.24516	1.19153	1.17624	1.25617	1.43239	1.26296	1.1441	1.25088	1.32643	1.48139	0.880126	1.74699	1.43186	1.15139	1.26824	1.53243	1.58681	1.21022	1.41649	1.38763	1.21849	1.40404	1.37516	1.36942	1.37442	1.23529	1.1481	1.29917	0.865125	0.558185	1.27494	0.860294	0.839286	1	1.52415	1.67684	1.53901	1.683	1.86934	1.09045	1.29709	1.68815	1.35176
BRSK2-9	BRSK2	x	0.975635	1.14168	0.676275	0.96788	0.950476	1.29304	1.15606	0.977134	1.14335	0.774365	0.989425	0.899862	1.05812	0.994403	1.17956	1.27519	0.94012	1.28641	1.11298	1.09215	1.13307	1.24025	1.23089	1.79128	1.24254	0.97421	1.1826	0.976111	1.16552	1.03737	0.982348	1.04688	1.3545	1.02622	0.851182	0.916494	1.02162	1.00552	1.36536	1.04817	1.03049	1.21712	1.0798	1.37006	1.00634
BTK-1	BTK	x	1.01015	0.692144	0.670051	0.851792	1.14862	1.3135	1.15046	1.23077	1.46028	1.021	1.17656	1.10735	1.18511	1.21033	1.35391	0.975824	1.08081	0.887872	0.988024	1.19111	1.30296	1.3439	0.929688	1.648	1.32273	1.1757	1.56052	0.912857	1.08882	0.869688	1.33133	1.18933	0.475124	1.15163	0.965612	1.27684	0.809877	0.865714	0.812325	0.863248	0.834154	0.849206	1.07265	1.2578	0.865079
BTK-10	BTK	x	0.866667	0.975936	1.0414	1.14194	0.859935	1.11709	0.981982	1.08676	1.43914	1.20115	1.27505	1.57862	1.0678	0.967419	0.701657	1.08964	1.23367	1.64402	1.38776	0.866667	0.934307	0.98153	1.22877	1.12437	1.42212	1.3031	1.23768	1.27961	0.759786	1	1.2064	0.836991	1.3301	0.916264	1.10329	1.31616	1.05263	1.05751	1.24913	1.22846	0.960396	0.822368	1.24449	1.74257	1.59649
BTK-2	BTK	x	1.01575	1.03077	0.92053	0.768041	1.00613	1.24138	0.704301	1.29474	1.33484	1.33548	0.988235	0.966851	0.675393	0.543046	0.892086	1.45872	1.14504	1.08571	0.71831	1.19277	1.00833	0.9375	1.48555	1.66447	1.58125	0.356846	1.08597	0.799163	1.31718	0.876923	1.06299	0.912698	1.42149	0.985507	0.813187	0.663121	0.520548	0.761194	0.465116	0.702128	0.666667	0.707447	0.930851	0.390805	1.30319
BTK-3	BTK	x	1.29596	0.744802	1.2881	1.27484	1.09369	1.06667	1.00577	1.03501	1.52294	1.08907	0.991979	1.0378	0.9168	1.62474	0.956	0.978599	0.871622	1.10692	0.947699	0.731161	1.2897	1.32972	1.27797	1.13366	0.72384	1.46269	1.35566	0.892102	1.22835	1.09762	1.23518	1.18162	0.500921	0.979827	0.964912	1.03652	0.869307	1.00649	0.708163	0.972112	1.01102	0.627119	0.794157	1.34646	0.624511
BTK-4	BTK	x	1.56323	1.05585	1.1829	1.18983	1.05296	1.0173	1.20089	1.29504	1.59815	1.20559	1.17575	1.511	1.5991	1.33235	1.51617	1.3732	1.31579	1.24636	1.35227	1.49238	1.51338	1.3676	1.29967	1.1316	1.35595	1.36461	1.53089	1.05751	0.957973	0.978346	1.14112	1.20105	1.63727	1.04625	1.28275	1.25633	1.38518	1.60495	1.27618	0.841538	1.42802	1.18779	0.826154	1.78025	1.2145
BTK-5	BTK	x	1.05624	0.910323	1.47575	0.992857	1.0146	0.973188	0.835012	0.948159	1.10285	1.32639	0.93593	1.11609	1.09538	1.058	1.09589	1.12317	0.976268	1.10811	1.32589	1.06699	1.08497	0.987065	0.842802	0.858179	0.926471	1.64022	0.957051	1.05932	0.906475	1.01543	0.483992	0.569507	1.25361	0.920886	1.1067	0.856826	1.12092	1.21297	0.921205	1.47466	0.844613	0.899543	1.29434	0.88605	1.32811
BTK-6	BTK	x	1.14815	1.54795	0.941176	1.13834	0.945652	1.13139	0.724852	1.18987	0.752907	1.18473	1.45823	1.115	1.25287	1.26014	0.690341	0.933594	1.65957	1.13122	1.10169	1.18462	1.1	1.20305	1.47009	1.02865	0.859122	1.67168	0.976293	1.26225	0.980306	1.0859	1.38559	1.06376	0.283262	0.796163	1.72245	0.772401	0.934426	1.0087	1.42857	1.22754	0.650259	0.903308	0.694611	0.284974	0.778626
BTK-7	BTK	x	0.986577	1.16509	0.583756	0.748299	1.05854	1.06375	1.05364	1.04247	0.820946	1.53526	1.25076	1.49691	1.28916	1.00917	0.773077	1.3494	0.865	0.696262	1.16667	1.0249	1.72928	1.0613	1.09408	1.23729	1.23333	1.3035	0.978788	0.915452	1.18702	1.36184	0.830601	0.762791	0.909548	0.95	1.14331	0.888587	1.12366	1.02797	0.944134	0.924731	0.666667	1.02414	0.655914	1.14683	0.67931
BTK-8	BTK	x	1.13659	0.843653	0.645631	1.00832	1.19223	1.19675	0.853067	0.84701	1.11228	1.00496	1.12115	0.990693	1.08478	1.13805	1.11502	1.07321	0.991379	1.02544	1.54016	1.34046	1.34927	1.14912	1.21879	1.14752	0.815	2.09322	0.940092	0.880457	0.907933	1.06045	0.852989	0.938038	0.80414	0.955882	1.33846	0.857582	1.12181	1.10506	1.1609	1.11554	1.25548	1.04976	0.896414	1.3729	0.916533
BTK-9	BTK	x	0.861407	0.913386	1.33404	0.876827	0.912698	0.804577	0.812816	1.34156	0.851682	0.820611	0.794192	0.989899	1.12041	1.06055	1.04642	1	0.789809	0.958425	1.125	1.19059	1.12288	1.10684	1.31771	1.31765	1.16544	2.37523	1.43445	1.05115	1.16711	1.06184	0.526205	0.66958	1.07489	0.968839	0.984375	0.975968	0.893401	1.11752	1.07579	1.12938	1.10485	1.09204	0.794521	0.898279	1.45398
BUB1-1	BUB1	x	0.288889	0.290909	0.261905	0.559322	1.23684	0.916667	0.115385	0.288462	0.408163	0.941176	0.145455	0.515625	0.888889	0.404762	1.86538	0.0298507	0.770833	0.238095	0.78	2.66667	0.326923	0.660377	0.981818	0.227273	0.384615	0.0438596	0.45	1.04762	0.594937	0.212389	0.770492	0.333333	0.918919	1.04762	1.63492	0.455556	0.195122	0.413043	0.896552	0.788889	1.46667	0.516854	0.811111	0.7	0.191011
BUB1-10	BUB1	x	0.921606	0.627255	0.425957	0.767308	0.677596	0.809434	0.471845	0.574616	0.509669	0.491525	0.280285	0.488372	0.582897	0.56129	0.570579	0.416822	0.42155	0.357798	0.578313	0.422374	0.225746	0.350267	0.427547	0.621087	0.46301	0.257225	0.295556	0.910336	0.586108	0.760046	0.562284	0.313646	0.635231	0.377562	0.384615	0.505115	0.314168	0.53139	0.509756	0.33245	1.02839	0.527202	0.311258	0.753943	0.869171
BUB1-11	BUB1	x	0.442188	0.767372	0.337793	0.856187	0.689984	0.810084	0.937575	0.561677	0.751359	0.631902	0.741897	0.568562	0.602291	0.753676	0.568794	0.733884	0.500894	0.510101	0.440217	0.474336	0.744726	0.447917	0.579439	0.678161	0.38706	0.435227	0.199079	0.996372	0.845829	0.922732	0.476277	0.753404	0.660661	0.538543	0.58089	0.755915	0.338768	0.519916	0.452381	0.628032	0.725869	0.444305	0.615903	0.734878	0.583229
BUB1-12	BUB1	x	0.953586	0.589552	0.35	0.962406	1.05882	0.718876	0.597778	1.04438	0.619617	0.530055	0.452436	0.548469	1.01389	0.851064	0.784553	0.7	0.819328	0.534653	0.817391	0.696581	0.697211	0.890282	0.855524	0.852174	0.416327	0.67381	0.214092	0.834835	0.903148	0.726496	0.662651	0.171329	0.752727	0.416667	0.56513	0.694352	0.478261	0.5	0.68306	0.325815	0.612536	0.596273	0.365915	0.492877	0.419255
BUB1-2	BUB1	x	0.453552	0.287234	0.38	1.05	0.772	0.91844	0.781481	0.463158	0.446043	0.997449	0.572559	0.637236	1.82278	0.829268	1.14737	0.363184	0.303419	0.512048	1.05797	0.816733	0.845794	1.40925	0.476341	0.589831	0.32783	0.346253	0.528205	0.777409	0.505747	0.586022	0.0632184	0.471591	0.936782	0.42616	0.850117	0.429799	0.509677	0.421769	0.6	1.03502	0.489583	1.0424	0.40856	0.598958	0.547703
BUB1-3	BUB1	x	0	0.583333	0.509804	0.57971	0.493976	1.13793	1.22917	0.26087	0.677419	0.241935	0.396825	0.161765	0.673913	0.152542	0.864407	0.650794	0.295455	0.259259	0.246753	0.373134	0.869565	0.571429	0.182796	0.310345	0	0.101449	0.0961538	1.63291	0.734177	0.737288	3.15385	0.288136	0.631579	0.0822785	0.91	0.378151	0.170213	0.431373	0.516129	0.0697674	0	0.12963	0	1.04918	0.0555556
BUB1-4	BUB1	x	0.446367	0.832031	0.124481	0.879032	0.923077	0.629139	0.368286	0.409877	0.792023	0.654391	0.376218	0.604061	1.02422	0.616236	0.896266	0.475113	0.433225	0.440613	0.375527	0.472727	0.205479	0.402985	0.398026	0.554745	0.949367	0.456432	1.06209	0.733051	0.831797	0.608607	0.833333	0.40636	0.923695	0.389401	0.767081	0.490814	0.533019	0.418103	0.497835	0.398305	0.563415	0.786325	0.252119	0.3	1.50427
BUB1-5	BUB1	x	0.301865	0.287918	0.459677	0.394451	0.513067	0.651297	0.379162	0.40102	0.29206	0.227045	0.275428	0.189639	0.334568	0.162884	0.185393	0.705128	0.524183	0.660574	0.366959	0.266082	0.294974	0.33033	0.259596	0.298283	0.265542	0.178295	0.0695553	0.548436	0.699029	0.534938	0.488467	0.498649	0.648803	0.204188	0.189711	0.325188	0.200311	0.187861	0.278443	0.491474	0.455446	0.924607	0.841525	0.50225	0.569634
BUB1-6	BUB1	x	0.472585	0.413462	0.608479	0.675299	0.664352	0.637744	0.204589	0.430684	0.333919	0.31484	0.704433	0.527919	0.453125	0.663158	0.646552	0.344928	0.454774	0.365169	0.455959	0.427083	0.388412	0.355818	0.511265	0.345059	0.104056	0.306358	0.279389	1.02373	0.882171	0.615975	0.550898	0.497238	0.845697	0.381844	0.372611	0.383162	0.284024	0.436893	0.367347	0.259392	0.452	0.781915	0.348837	0.39	0.849291
BUB1-7	BUB1	x	0.228261	0.181481	0.0977199	0.419355	0.581301	0.430605	0.153226	0.139474	0.156951	0.186352	0.221709	0.263279	0.368821	0.319502	0.372168	0.162866	0.18251	0.625	0.225	0.17094	0.096	0.126344	0.393678	0.280105	0.0288184	0.028777	0.20339	0.551797	0.538175	0.582822	0.21148	0.127907	0.150171	0.154455	0.174334	0.142857	0.172414	0.14876	0.070922	0.0861345	0.183771	0.563889	0.140756	0.133652	0.536111
BUB1-8	BUB1	x	0.421053	0.730881	0.61306	1.04551	0.899135	0.93998	1.1953	0.951841	1.11286	0.564563	0.619505	0.621676	0.882022	1.15634	1.209	0.667864	0.79771	0.763521	1.14533	1.17303	1.016	1.04649	1.09327	1.09739	0.277378	0.362671	0.323678	0.888325	1.08107	0.831667	0.566396	0.993435	0.546243	0.897973	1.07897	0.727164	0.792669	0.720639	0.831776	0.997126	1.01036	0.804009	1.22701	1.23743	0.662955
BUB1-9	BUB1	x	1.05599	1.19608	0.986689	1.0885	1.2603	1.27257	1.78216	1.31105	1.38406	1.45769	0.839506	1.08667	1.38611	1.04342	0.877372	1.04296	1.46283	1.10984	1.19884	1.20282	1.32756	1.23611	1.21488	1.32959	0.609579	0.559033	0.949384	1.00552	1.2311	1.11668	0.765	1.24752	1.44167	0.730326	0.774315	0.931109	1.06262	0.993927	1.00818	1.16649	0.781285	0.997655	1.31012	0.994363	1.24736
BUB1B-1	BUB1B	x	0.557845	0.313725	0.527273	0.588674	0.604878	0.482709	0.472325	0.429504	0.23192	0.368421	0.320841	0.274746	0.379224	0.500629	0.343015	0.62215	0.578151	0.596748	0.331858	0.376307	0.358634	0.562923	0.338101	0.475212	0.907534	0.903471	0.706847	0.301086	0.38294	0.361721	0.827988	0.542994	0.570108	0.69035	0.453498	0.591858	0.29361	0.349835	0.424299	0.972833	0.517396	0.420134	0.664942	0.675645	0.402685
BUB1B-10	BUB1B	x	0.346309	0.281609	0.348601	0.833628	0.809028	0.77226	0.556258	0.357364	0.363341	0.414864	0.399575	0.422243	0.876923	0.611694	0.572156	0.311047	0.331307	0.386667	0.435398	0.495544	0.457082	0.720297	0.791506	0.83982	0.358621	0.45539	0.28934	0.576676	0.449915	0.619782	0.419602	0.245536	0.182584	0.548881	0.560516	0.447316	0.252971	0.223169	0.17265	0.300668	0.611053	0.559959	0.173719	0.379562	0.378049
BUB1B-2	BUB1B	x	0.269488	0.176829	0.448133	0.666667	0.505051	0.450893	0.303716	0.371717	0.277385	0.491339	0.485618	0.650897	0.372807	0.501066	0.521277	0.226496	0.187633	0.216749	0.565217	0.462338	0.35867	0.491903	0.4	0.433333	0.378608	1.1875	0.909292	0.247539	0.257493	0.485423	0.144522	0.416136	0.138817	0.336039	0.468189	0.266886	0.413105	0.324538	0.532213	0.467742	0.315972	0.213592	0.227419	0.126736	0.213592
BUB1B-3	BUB1B	x	0.367754	0.331606	0.524	0.778641	0.719836	0.722543	0.251282	0.49553	0.213018	0.565217	0.45819	0.534183	0.426982	0.591736	0.517301	0.408537	0.336049	0.325411	0.768898	0.460504	0.420755	0.68777	0.437751	0.704023	0.294857	0.252016	0.824584	0.433406	0.332962	0.578698	0.650672	0.505547	0.328185	0.425462	0.479319	0.460986	0.344	0.3762	0.377273	0.451157	0.643664	0.789238	0.137532	0.666248	0.831091
BUB1B-4	BUB1B	x	0.702101	0.993412	0.744764	0.911243	0.893545	0.906832	0.671456	0.636447	0.946488	0.686434	0.72264	0.748344	0.842236	1.10957	1.12467	0.638184	0.708549	0.608146	0.878107	1.0123	1.2756	1.04798	1.01987	0.925177	0.377031	0.60036	0.639878	1.00241	0.872019	0.835516	0.483039	0.656121	0.235443	0.995021	1.32038	0.905395	0.709821	0.726879	0.823333	1.03781	0.798937	0.945525	0.947264	0.732507	1.19358
BUB1B-5	BUB1B	x	0.533898	0.297194	0.321826	0.729585	0.658057	0.737437	0.125107	0.369722	0.286344	0.472315	0.391608	0.433913	0.44206	0.373151	0.632979	0.292964	0.354005	0.277476	0.331484	0.348665	0.411229	0.464876	0.564795	0.65227	0.456415	0.402264	0.690367	0.700574	0.58339	0.606557	0.672956	0.162971	0.125628	0.459532	0.478499	0.383178	0.342929	0.376266	0.276901	0.365812	0.249377	0.282407	0.540171	0.174564	0.428704
BUB1B-6	BUB1B	x	0.195896	0.665217	0.582121	0.805344	0.692308	0.713684	0.178396	0.321306	0.250799	0.371565	0.319809	0.680739	0.593128	0.694268	0.625	0.279503	0.339168	0.519187	0.400474	0.329545	0.4942	0.527988	0.449675	0.585	0.36374	0.32	0.289902	0.602257	0.54702	0.659121	0.257796	0.530172	0.141684	0.407307	0.716393	0.904692	0.406321	0.346983	0.307888	0.88122	0.434655	0.339683	0.685393	0.258443	0.380952
BUB1B-7	BUB1B	x	1.57424	1.37097	1.09714	1.08366	1.12992	0.909984	2.04367	1.69207	1.35276	1.29098	1.29608	1.33082	1.29196	1.24417	0.971119	1.17913	1.29268	0.988294	1.32473	1.4551	1.2397	1.49544	1.70322	1.40351	1.61765	1.47153	1.30303	1.03645	0.953439	0.875	1.05611	1.08588	1.1562	1.14178	0.815552	0.927918	1.61522	1.26012	1.28571	0.755582	1.29445	1.80591	0.815511	1.56472	2.11533
BUB1B-8	BUB1B	x	0.554945	0.45124	0.341259	0.813459	0.875792	0.920049	0.350165	0.459495	0.493639	0.84466	0.828162	0.704067	0.970213	0.949037	1.28864	0.448905	0.295987	0.445328	0.749049	0.561308	0.685676	0.728733	0.665406	0.651838	0.692877	1.16437	1.1623	0.512249	0.775463	0.668838	0.354409	0.380623	0.636882	0.838294	0.600722	0.782203	0.238004	0.34749	0.450867	0.813657	0.904645	0.797739	0.641204	0.740831	1.01884
BUB1B-9	BUB1B	x	0.279915	0.423767	0.580282	0.683267	0.823232	0.691542	0.287719	0.370297	0.700246	0.470277	0.598846	0.61051	0.506849	0.529637	0.751843	0.363881	0.212815	0.208845	0.34359	0.36891	0.439589	0.561279	0.439367	0.357977	0.243789	0.247692	0.217308	0.571649	0.806835	0.644122	0.24	0.560081	0.507788	0.754885	0.5311	0.525	0.153846	0.173021	0.202417	0.898876	0.530214	0.785563	0.966292	0.530214	0.607219
C9orf96-1	C9orf96	x	1.22848	0.722591	0.904362	1.01724	0.936426	1.07308	0.871972	0.558458	0.700501	1.06809	0.885097	0.796276	0.907712	1.25714	1.17512	0.793617	0.777586	0.698413	1.09341	0.952191	1.2057	0.846377	0.829132	0.971654	0.554967	1.15604	0.821473	1.16897	1.1677	0.834186	1.91171	1.57673	0.930233	0.740314	0.723337	1.07506	1.18777	1.05642	0.970986	1.14465	1.06968	1.27974	0.909434	0.941935	1.32549
C9orf96-10	C9orf96	x	1.18391	1.34821	1.47799	0.930481	0.982955	1.14754	0.96	1.90196	1.31179	1.41528	2.04132	1.01799	1.21596	2.09091	1.04104	1.23977	1.13514	1.73913	1.23318	1.38208	1.72785	1.22145	1.30137	1.07807	1.6917	1.31169	0.765363	0.988473	1.1875	0.754286	0.433498	3.27273	0.836735	0.76455	1.3255	1.3705	1.42949	1.44785	1.56805	1.08	0.73029	0.871698	1.556	0.634855	1.40755
C9orf96-2	C9orf96	x	1.02659	1.37886	0.782247	1.08548	1.20033	1.17214	1.43098	0.803879	0.950331	1.08302	1.36324	1.06487	1.1642	1.27348	0.794118	1.13289	0.922043	1.18169	1.13086	1.24013	1.23684	0.920455	1.14003	1.12367	0.80107	0.963035	1.3321	1.15561	1.12216	0.961806	1.07027	1.11877	1.21745	1.00557	0.969124	0.975352	1.28319	1.05396	0.971429	0.714747	1.49543	0.856984	0.899892	1.77055	0.935698
C9orf96-3	C9orf96	x	1.3536	1.38194	0.591865	0.982379	1.15556	1.1399	1.40365	1.37875	1.60222	1.20219	1.35691	1.11685	1.28811	1.14489	1.53546	1.02242	1.374	1.66992	1.67219	1.62069	1.49718	1.45633	1.66667	1.53881	1.37072	1.52327	1.53085	1.09059	1.11251	1.10853	1.19086	2.12392	1.0872	1.44283	1.30872	1.29185	1.31409	1.29748	1.29016	1.10238	1.15171	1.18979	0.724922	1.14744	1.80133
C9orf96-4	C9orf96	x	1.11194	1.54325	1.43514	0.988258	0.824156	0.983471	0.993026	0.687788	1.0875	1.09987	0.976	0.93758	1.3129	0.983146	1.05585	0.833622	0.976059	1.12734	1.01691	0.92623	1.27475	1.0497	0.853767	1.07527	1.49408	0.954103	0.684549	0.971678	1.00623	0.943304	1.42593	1.31448	1.75099	0.869656	1.26093	1.14078	1.01867	1.19463	1.14369	0.862694	1.32349	0.798246	0.831606	1.46213	0.919799
C9orf96-5	C9orf96	x	1.59559	1.59524	1.13582	0.959528	1.14594	1.06003	1.07189	0.945406	1.17103	1.30112	1.44118	1.39684	1.04893	1.01789	1.5727	1.33854	1.05853	1.42561	1.69277	1.71855	1.4632	1.16193	1.50265	1.23279	1.61783	1.50595	1.56164	1.12059	1.13262	0.912731	1.83891	1.96597	1.44107	1.08412	1.53836	0.964583	1.01163	1.28131	1.18505	1.0599	1.53846	1.27839	1.01956	1.25035	1.10501
C9orf96-6	C9orf96	x	0.659193	0.71564	1.10345	1.15021	1.08225	0.856522	1.18143	1.09968	1.00637	0.707447	0.787791	0.981707	0.957364	1.38585	1.41202	0.656566	0.497608	0.981013	1.39631	1.99363	1.25581	1.121	1.28435	0.946996	0.946541	0.386598	0.955326	1.15472	1.36842	0.874618	1.03468	1.92647	0.634783	0.897351	0.914706	0.883721	1.44025	1.84397	1.31	0.979757	0.83871	0.618123	1.94332	0.790323	0.394822
C9orf96-7	C9orf96	x	0.567039	0.514085	0.76	1.00224	0.938272	1.1851	0.865546	0.887681	0.79716	0.95098	0.784011	0.936296	0.869464	0.62749	1.20273	0.94709	1.27826	0.848665	0.847291	0.830396	1.09602	0.530508	0.759099	1.13215	0.943844	1.06708	0.739198	1.09868	1.07117	1.41873	0.830409	1.04087	0.673469	1.06024	1.16744	1.04796	0.886503	1.28065	1.22727	0.977695	1.00424	0.780769	1.29554	0.904661	0.601923
C9orf96-8	C9orf96	x	1.41194	1.44604	1.75128	1.04096	1.17632	1.1432	1.70345	1.26901	1.23721	1.26475	1.28711	1.32237	1.42147	1.34597	1.43069	1.17232	1.99685	1.29326	1.36896	1.50769	1.69375	1.46087	1.28064	1.55462	1.63039	1.0858	2.00813	0.729131	1.09168	1.10836	1.7549	0.508393	2.49206	1.49015	1.03846	1.28413	1.375	1.24926	1.44051	1.72584	1.30687	1.23838	1.61348	2.07082	1.11919
C9orf96-9	C9orf96	x	0.885886	0.867672	1.25893	1.07207	0.953795	0.994242	0.823353	0.882431	0.620306	1.03317	0.924945	1.00319	0.917323	0.773026	0.792857	1.05017	1.32237	1.08104	1.19231	0.843985	1.06863	0.74933	0.689567	0.965926	1.13901	1.0663	0.913155	0.930556	1.04294	0.837662	1.02022	1.01314	1.15177	0.923409	1.20301	0.71016	0.924242	1.22846	1.06061	1.18779	0.819692	0.766935	1.1682	1.14591	0.853042
CAMK1-1	CAMK1	x	0.744505	1.35736	1.27987	0.965879	1.37466	1.17213	1.01411	0.720322	1.25679	1.20641	1.42911	1.25133	1.21158	1.08054	1.50168	1.0413	1.19489	1.16864	1.20202	1.65341	1.21348	1.18375	1.43182	1.24375	1.05024	2.02376	1.45994	1.2877	0.947776	1.31866	0.948127	1.12952	0.582633	1.32165	1.35755	1.22901	1.45818	1.47163	1.388	1.47156	0.81203	1.07356	1.59479	0.776942	0.737931
CAMK1-10	CAMK1	x	1.08453	0.725177	0.641026	1.01727	0.721519	0.794702	0.793574	0.945069	0.876623	1.08824	0.75388	0.735328	1.16534	0.950266	0.781206	0.761658	0.696095	0.923664	0.788256	0.692748	0.651976	0.73868	0.715385	0.622132	0.535366	1.07042	1.20526	0.919529	0.777465	0.71977	0.762799	0.576677	1.3161	0.879121	1.33516	0.849549	1.07946	0.94964	0.692759	1.19918	0.852871	0.798144	1.58379	0.82177	0.614849
CAMK1-2	CAMK1	x	0.82494	1.16914	0.786932	0.983471	1.02809	1.25326	1.12598	0.760611	0.767642	1.5269	0.902266	0.802528	0.77439	1.33705	1.01003	1.33835	1.03415	0.918519	0.721264	0.919003	0.823848	1.05911	0.99031	0.800789	0.610098	1.10321	1.6048	1.00669	1.01952	1.1046	1.14793	1.77804	0.915525	0.505587	0.951589	1.1462	0.558209	0.808917	0.535135	1.23022	1.2464	1.08989	1.64748	0.75	0.544141
CAMK1-3	CAMK1	x	1.58017	1.14167	0.653846	1.25631	0.923913	1.16856	1.06199	1.39823	1.31385	0.731083	1.36888	1.14509	1.44182	1.06481	1.22719	1.13015	1.04113	0.909091	1.6588	1.44573	1.31195	1.26263	1.20351	1.16717	1.37296	1.07078	1.2573	1.17528	1.39216	1.04604	1.56911	0.976378	0.89858	1.31925	1.40718	1.15272	1.13626	1.41553	1.17257	1.1479	0.896952	1.17167	1.02185	0.82148	1.5279
CAMK1-4	CAMK1	x	0.710317	0.626667	0.777547	0.832099	0.862921	1.06769	0.869489	1.37291	0.829412	1.36907	0.937117	0.797139	1.33333	1.65136	1.27578	1.21268	1.25397	1.11247	1.14925	0.954853	0.912556	1.10994	1.22813	0.852665	1.11804	0.879139	1.09418	1.02528	0.9066	1.18286	0.589242	0.902954	1.14189	0.941406	1.18901	0.890295	0.737443	1.05502	1.09111	0.815486	1.19741	0.860353	1.01812	1.26052	0.804173
CAMK1-5	CAMK1	x	1.26186	1.30582	0.932432	1.02238	1.08333	0.923328	0.626238	1.00868	0.65866	1.00698	0.923077	0.937107	1.02478	1.01363	0.963272	1.04786	0.996737	0.942857	1.3295	0.910995	0.996516	0.975921	1.3468	1.1612	1.2643	0.367188	0.958884	1.13289	0.828713	1.11902	0.960884	1.02872	0.639368	1.18558	1.47791	0.931315	1.08445	1.02793	1.09962	0.766484	0.943937	0.81749	0.853022	0.739244	0.789607
CAMK1-6	CAMK1	x	0.973134	0.952507	1.41322	0.625277	0.84949	0.771845	0.545833	0.60179	1.33763	1.00621	0.589701	0.800664	1.33175	1.34257	1.02851	0.851852	1.1433	0.598071	0.967552	0.891374	0.723343	0.826772	1.13158	0.722353	0.958869	0.630435	1.82011	1.03056	0.691814	0.834081	0.611111	1.43539	0.777778	0.789842	1.17907	0.807615	0.788991	0.945122	1.0815	1.13861	0.62635	0.961864	1.65594	0.37581	1.67797
CAMK1-7	CAMK1	x	1.07692	0.948819	1.01048	1.10549	0.96008	0.867816	1.3339	0.881503	0.892308	0.906832	0.909366	0.879573	1.17061	1.5446	0.994275	0.860417	0.849765	1.0364	0.721088	0.935412	0.623404	0.899557	0.824588	0.865906	0.995378	0.741096	1.09254	0.853333	0.898765	1.05628	0.97551	1.46422	0.641343	0.975676	0.818396	1.15429	0.886918	1.1005	0.716667	0.82948	0.545822	0.77573	1.33815	0.556604	1.18433
CAMK1-8	CAMK1	x	1.35447	1.1348	1.05217	1.09612	1.03829	1.40034	1.08484	0.732318	1.14506	1.04184	1.10643	1.18255	1.14016	1.00851	0.989164	1.0672	0.973166	1.25466	1.17808	1.2677	1.05657	0.974972	1.28903	1.02497	1.55689	0.931907	1.03226	1.07753	0.970617	1.01257	1.10577	1.07846	0.877497	0.891787	0.861909	1.01927	1.16667	1.26607	1.10377	1.10629	0.980973	0.883777	0.881779	1.64482	1.17676
CAMK1-9	CAMK1	x	1.1898	0.770919	0.989757	1.08548	1.10665	0.970833	1.02612	0.901048	1.27929	1.01911	0.988615	0.955432	1.28529	1.54023	1.09818	0.789333	1.12031	0.91688	1.05271	1.0976	0.816692	0.989011	1.19296	1.16539	1.3385	1.17177	1.24722	1.00406	1.2	1.02056	1.12393	1.03186	1.04866	1.1572	1.07958	1.15647	0.853403	1.1504	0.926332	1.17214	1.11289	0.95087	1.52338	1.06593	0.776868
CAMK1D-1	CAMK1D	x	1.28571	1.43838	1.17018	1.07947	1.16727	0.955446	1.45337	1.23303	0.998705	1.04726	1.00097	1.1663	0.855769	1.33929	1.08856	0.925865	1.4736	1.11055	0.853147	1.03943	1.05647	1.23822	1.3071	1.10354	1.1267	1.08766	1.61905	1.03801	1.16462	1.04167	1.20833	0.822932	1.09783	0.986961	1.08869	1.61847	1.24593	0.808664	1.15523	0.916972	0.795152	1.2117	0.783883	1.10667	0.967021
CAMK1D-10	CAMK1D	x	0.626834	1.30787	1.21154	0.954296	1.00769	1.0113	1.13543	0.985669	0.781977	0.983355	1.02774	0.982216	1.06702	1.03338	1.26223	0.719745	1	0.811567	0.935484	1.19665	1.028	1.0892	0.963557	0.964333	1.27796	1.51549	1.74037	1.26623	0.845404	1.07368	1.39474	0.464844	1.80463	1.01442	1.20986	1.18211	1.10582	0.942308	0.777778	1.28676	0.870504	1.29365	1.4375	0.870504	1.3254
CAMK1D-2	CAMK1D	x	1.13766	1.23066	0.980551	1.01565	1.18802	1	1.03764	1.21835	0.897891	1.19678	0.985839	1.00606	1.14138	1.1646	1.16336	1.03506	0.944356	1.32283	1.10166	1.18934	0.924956	1.25548	1.15225	1.04318	1.6767	0.705419	0.979571	1.08882	1.09588	1.02669	0.863201	1.26688	0.982507	1.26071	1.60086	1.30891	1.07679	0.992331	0.996581	1.08036	0.856978	1.57231	1.21317	0.925029	0.962917
CAMK1D-3	CAMK1D	x	0.875415	1.19426	1.34791	1.05986	0.968896	1.07267	0.847497	0.897959	0.981203	0.880716	1.00728	1.14799	1.00447	1.05034	0.948357	1.26981	1.08567	1.20423	0.965251	0.888693	0.831643	1.16966	1.03183	1.05866	1.58995	1.24774	1.29875	1.08414	1.05479	1.125	0.928819	1.78072	1.27422	1.13368	0.729549	1.00089	0.765835	0.722868	0.929167	1.66147	1.3078	1.44557	1.31669	1.2695	1.50943
CAMK1D-4	CAMK1D	x	1.11972	0.816054	1.21681	1.05699	1.02239	0.792703	1.1026	1.31912	1.56757	1.02585	0.752056	1.02765	1.30105	1.33443	0.852217	1.01101	1.29697	1.30534	1.11714	1.10152	0.910305	1.27879	1.3783	1.28169	1.05562	1.57489	1.02423	1.111	1.09732	1.20361	1.70599	0.515055	1.82065	0.862857	0.831545	1.26087	0.743219	0.982533	0.862275	0.769324	1.38356	0.880952	0.774155	1.72229	0.621554
CAMK1D-5	CAMK1D	x	1.01585	1.25373	1.08501	1.06782	1.04115	0.940086	1.09862	0.988304	1.42757	1.08881	1	1.07565	0.785252	0.942939	0.973427	1.1218	0.833828	0.992614	1.27344	1.04985	0.923875	1.1848	1.1125	0.959137	1.23987	2.03212	1.45963	0.821541	1.33333	0.976522	1.02038	1.93363	0.968208	1.02868	1.06691	1.20437	1.10938	1.20032	1.24015	0.77971	0.745197	1.21369	0.58744	0.982811	1.0778
CAMK1D-6	CAMK1D	x	1.17179	1.22938	0.86875	0.884337	1.35813	1.08997	1.90888	1.26682	1.05817	1.03061	1.02377	1.07042	1.00897	0.649194	1.35248	1.13296	0.956647	1.59403	1.31805	0.807292	1.24292	0.570058	0.979296	0.907336	0.802413	0.939623	0.7568	0.913821	1.06076	1.0477	0.887006	1.40162	1.82941	0.931153	1.1254	0.992844	1.02516	1.06522	0.855124	1.38583	1.41463	1.03822	1.59646	1.49002	1.07219
CAMK1D-7	CAMK1D	x	1.11886	1.00247	1.01882	1.11436	1.01176	0.957447	0.934579	1.25	0.969892	0.99115	0.896285	1.01083	0.945946	0.901442	0.783439	1.25	1.2732	1.07595	0.7	0.738462	0.92233	0.922311	0.694118	0.680222	1.19813	1.34028	1.64151	0.872564	1.20806	0.889933	1.66244	1.41149	1.17169	1.04481	1.17496	0.799383	0.626404	1.01149	1.15854	0.851724	0.762279	0.990584	0.972414	0.679764	0.817326
CAMK1D-8	CAMK1D	x	0.785714	1.18557	0.68984	0.738197	0.853061	1.06	1.2249	1.4823	1.26578	1.35433	1.15858	0.922535	1.21951	1.19758	0.640678	1.42581	0.882682	0.689655	1.43103	1.07027	1.60345	1.05068	0.642384	1.08276	1.70435	0.762411	1.12319	0.968553	1.21086	1.09118	3.78771	0.807107	1.56647	1.13953	0.694524	0.760331	1.05797	1	0.791667	0.378676	1.46614	0.878893	0.323529	1.15936	0.698962
CAMK1D-9	CAMK1D	x	0.932084	0.9375	0.698297	1.22525	1.19459	1.10582	1.20099	1.35882	1.28862	0.970992	0.832776	1.09916	2.00714	1.36612	1.12972	1.03294	1.22414	1.03614	0.996933	1.02948	1.42025	1.25954	1.204	1.42699	0.85873	1.258	1.06229	1.23309	0.852055	1.27692	1.27938	0.495595	0.855556	0.915683	1.02738	1.66667	0.843085	1.01099	1.1039	1.99606	1.19099	1.55748	2.21696	1.14378	1.88937
CAMK1G-1	CAMK1G	x	1.26524	1.12422	1.10947	1.03846	0.807692	1.0221	1.27336	1.33505	0.815461	0.872587	1.00345	0.773006	0.902965	0.804396	1.14126	0.828479	1.53571	1.0625	1.13608	1.17052	0.848485	0.699422	1.1234	0.702586	1.89147	1.09652	0.797516	1.40808	1.33398	1.12053	1.0173	0.507979	0.976027	0.930743	1.04554	0.993289	1.09718	0.894118	0.822695	1.77436	1.386	0.891667	1.62308	1.666	0.770833
CAMK1G-10	CAMK1G	x	1.18554	1.77855	1.49635	0.971084	1.16531	0.870283	1.09025	1.11826	1.18701	1.25468	1.36713	0.936893	0.860892	1.41691	1.46092	1.14321	1.3445	1.10069	1.36364	1.43421	1.2153	1.26598	1.36406	1.50971	1.08073	1.1395	1.12716	1.07102	1.07672	0.928382	1.66505	0.994845	0.849879	1.36814	1.57082	1.369	1.19598	1.05913	1.52353	1.01698	0.935897	1.26632	2.43396	1.48352	0.975945
CAMK1G-2	CAMK1G	x	1.01413	1.35924	1.27864	1.16939	1.16944	1.04539	1.06943	0.795129	1.26764	1.32854	1.37135	1.1875	0.816993	1.2243	0.952894	1.08994	1.41477	1.31287	1.05923	1.19286	1.00147	1.03613	1.28792	1.16809	1.16034	1.15446	0.81297	1.09019	1.03541	1.00389	1.78799	2.37925	1.49133	1.09148	0.809562	0.775923	1.02486	0.80038	1.17375	1.21787	1.03218	0.862069	1.29743	1.0882	1.13793
CAMK1G-3	CAMK1G	x	1.70888	1.70946	0.961702	1.04409	0.900154	0.935229	0.958643	1.20668	1.16379	1.10874	1.08887	1.22846	1.05942	1.12746	1.31118	1.23844	1.36473	1.38725	1.12409	1.37291	1.58228	1.4023	1.22363	1.393	1.60959	1.81681	1.36048	0.966614	1.22391	1.09965	1.2555	1.43471	1.36609	0.885331	1.4141	0.868936	1.40575	1.38908	1.52321	1.63848	1.26593	1.95256	1.53431	1.33407	1.55306
CAMK1G-4	CAMK1G	x	0.880769	1.76018	1.88353	1.30252	1.24896	1.16791	1.22531	0.993865	1.01493	1.5843	1.61183	1.0368	1.20455	1.5443	1.30164	1.46429	1.32127	1.26695	1.46117	1.32781	1.99535	1.23269	2.03691	1.43642	1.98204	0.76257	0.855805	0.990291	1.00229	1.27494	1.05195	1.23661	1.48319	0.995381	1.29412	1.25197	1.15351	1.19824	1.16162	1.71831	0.829268	1.51913	1.64507	0.823171	0.980874
CAMK1G-5	CAMK1G	x	2.0596	1.15333	1.5274	1.15459	1.43103	1.12143	0.614786	0.78903	0.971963	1.17073	0.95625	1.20805	1.32129	1.18436	1.61176	1.00562	1.53548	1.38843	1.5748	1.23899	1.25595	1.45714	1.45238	1.27513	1.84615	1.3245	1.70034	0.9631	1.22662	2.1623	0.68323	1.67262	0.37	1.07571	1.0303	1.09594	0.987952	0.876812	1.80576	0.742647	1.5	0.790514	1.27941	2.16942	1.12648
CAMK1G-6	CAMK1G	x	0.852217	0.849028	0.968966	0.936842	1.02488	0.921659	0.577049	0.551724	0.648604	0.823465	0.692906	0.551839	0.997155	0.927103	0.840696	0.891652	0.885036	0.862434	0.897394	0.980973	0.930743	0.974127	0.921446	0.909646	0.797101	1.31662	1.38253	0.815385	0.957099	1.1607	0.90925	1.44844	0.702256	0.997719	0.814554	0.815	0.879592	0.850352	0.647601	0.740072	0.811821	0.683739	0.818291	0.687575	0.632522
CAMK1G-7	CAMK1G	x	1.01034	1.29042	1.43131	0.911364	0.908416	0.887978	0.836653	0.948122	0.867679	1.3419	1.05789	0.750408	0.816934	1.38608	1.04245	1.05542	0.965358	1	1.02989	0.796915	1.37662	1.32573	1.41667	1.50765	0.816415	1.10944	1.97115	0.971875	1.26678	1.31301	0.854701	1.65459	1.61371	1.1965	1.09516	1.28154	0.985915	0.888312	1.20455	1.1166	1.10058	1.06413	0.859684	1.02128	1.01403
CAMK1G-8	CAMK1G	x	1.26303	1.06322	0.934555	1.15837	1.11968	1.21975	0.877593	0.908438	0.830961	0.875524	0.914408	0.977401	1.09634	1.3004	1.03313	1.04839	1.52525	1.17169	1.31844	0.882353	0.925408	0.94162	0.969574	0.922465	0.94484	1.0371	0.708207	0.972337	1.04608	1.07898	1.07143	1.00225	0.645161	1.0459	1.05034	1.11481	1.08333	1.11475	1.11316	1.07797	0.885947	1.38095	1.1678	1.0224	1.05357
CAMK1G-9	CAMK1G	x	1.02444	1.26531	1.14211	1.08095	1.18465	1.08884	0.924915	0.871632	0.821363	1.21164	0.858166	1.32468	1.00452	1.41379	1.1942	0.870558	0.721951	1.1601	1.15136	1.17085	1.13111	0.970588	1.10962	1.26465	1.03927	1.58974	1.43107	1.03581	1.56934	1.29645	0.980861	1.33941	0.921389	1.0365	0.726526	1.34628	1.01302	1.3039	1.14595	1.28545	1.02757	0.693772	1.14739	1.36765	0.692042
CAMK2A-1	CAMK2A	x	0.417722	0.806061	0.870504	1.04651	0.813793	0.721212	0.861244	0.476684	0.786364	0.772277	0.858407	0.72332	0.666667	0.994949	0.794872	0.717949	0.966667	0.527559	0.914773	0.521739	0.398876	0.484	0.551724	0.587379	0.8	0.760148	0.480159	1.32129	0.928571	0.403909	1.21935	0.671875	1.63793	0.851163	1.02283	0.900794	0.808696	0.811475	0.922414	0.222222	1.0122	0.634146	0.090535	0.670732	0.926829
CAMK2A-10	CAMK2A	x	1.31083	0.671474	0.754717	1.27381	1.04374	1.04258	1.11111	1.16989	1.28284	1.10543	0.973451	0.925483	1.38095	1.30459	1.00632	1.01064	1.07668	0.884615	1.18669	1.29806	1.03036	0.992443	1.19448	1.24969	0.787845	1.09541	0.621501	1.11232	1.11974	1.02596	0.737105	1.56135	1.09875	1.18549	1.37724	0.782805	1.00967	0.879581	1.00376	1.29009	1.65841	0.939535	1.35863	1.64928	0.913953
CAMK2A-2	CAMK2A	x	1.50154	0.846847	1.40432	0.917582	1.12952	1.00637	1.14528	0.849642	1.37467	1.329	1.38389	1.13292	1.06469	1.2861	1.35616	1.00673	0.976898	1.01337	1.40184	1.36538	1.16667	1.14789	0.9819	1.16312	1.10575	0.692691	0.628114	0.912249	0.86422	1.0037	1.92675	0.73064	1.05556	1.36552	1.32057	0.808307	0.979094	0.836576	1.01493	1.14781	1.2782	2.74194	1.03233	0.837093	5.04399
CAMK2A-3	CAMK2A	x	0.846154	1.06564	1.31894	1.03767	1.38914	1.24719	0.629808	0.706573	0.876712	1.12938	0.952174	1.07108	0.934524	0.814024	0.945813	1.53306	0.795031	0.961039	0.858491	1.28634	1.30453	0.939153	0.949868	0.849582	0.581081	0.718182	0.619308	1.54915	1.14179	1.48155	0.62069	1.0613	1.01767	1.16736	1.09487	1.10997	0.633218	1.28295	1.33203	1.17271	0.845133	0.906445	1.00426	0.798673	1.22661
CAMK2A-4	CAMK2A	x	0.973607	1.26171	0.498592	1.0542	0.932773	1.19375	0.901961	0.671362	0.969767	0.834337	0.950495	0.947867	1.71302	1.12846	1.01475	0.733119	1.03963	1.25547	0.808176	0.728324	0.846591	1.06095	0.917625	0.929412	1.23611	1.6858	0.962264	1.05903	1.22097	0.835556	1.25714	0.447205	1.00662	1.09161	1.47964	1.15466	0.954887	0.840136	0.845921	0.729084	1.53422	0.603896	0.426295	2.13024	0.915584
CAMK2A-5	CAMK2A	x	1.56128	1.24704	1.20145	0.970909	1.24319	1.03431	1.07828	0.949535	0.993548	1.3043	1.11745	1.54262	1.17647	1.22587	1.24386	1.04061	1.27656	0.92931	1.06916	1.42667	1.02896	0.900137	0.965374	1.1771	1.74128	1.10045	1.2242	1.2326	0.965127	1.18322	2.13321	0.945289	0.99374	1.21836	1.4484	1.53135	1.03986	1.16085	0.902344	1.33491	0.958831	0.679151	1.18799	2.07039	0.576779
CAMK2A-6	CAMK2A	x	0.925816	1.01102	0.864266	1.11184	0.765579	1.14286	0.711061	0.483607	0.766234	1.03493	1.03755	1.07765	1.16529	1.28274	0.958333	0.704545	0.593674	0.900302	0.934256	0.814815	1.0202	0.693587	0.810748	0.770642	1.04739	0.893709	0.993976	0.880597	0.836735	0.983302	0.608219	1	0.636986	1.02893	0.754513	1.06262	0.851301	0.911475	0.755396	1.4	0.61039	0.628261	1.65581	0.512987	0.613043
CAMK2A-7	CAMK2A	x	1.48478	1.64978	0.960648	1.17941	1.09737	0.872197	0.868275	1.1345	0.658041	1.25265	1.09509	1.09417	1.02141	1.06092	1.11776	0.741627	0.949425	0.936061	1.32026	1.53889	1.09223	0.924843	0.764259	0.930841	1.45668	0.980695	0.958333	1.18733	0.932432	1.17737	1.67098	1.05938	0.980932	1.00971	1.63395	0.978686	1.31778	1.35323	1.0205	1.29443	0.517375	1.20251	1.28725	0.573359	1.61381
CAMK2A-8	CAMK2A	x	0.773458	0.742739	0.536842	0.998584	0.879195	0.945205	1.10889	0.992999	0.806154	0.776304	0.91687	0.943556	1.1483	0.819629	0.753472	0.742779	1.06845	0.915141	0.84186	0.921095	0.743704	0.633333	0.564103	0.632209	0.95992	0.641988	1.17901	0.916667	1.03208	0.999107	0.903978	1.17366	0.719451	0.831063	0.890688	0.87619	0.966507	1.05772	1.15873	0.576008	1.03575	0.968147	0.723888	1.34493	0.871622
CAMK2A-9	CAMK2A	x	0.639175	1.16549	0.898354	1.02583	0.990654	1.17317	0.966394	0.933677	1.05245	1.11462	1.13997	0.831004	1.05717	1.31813	1.21755	0.916309	0.772829	0.896825	1.39501	1.23095	1.32177	1.04304	0.846419	1.1524	0.948142	1.81861	1.22073	1.08755	1.38717	1.17101	0.803748	1.37636	1.1588	1.32116	1.05349	1.35316	1.11935	0.989853	1.06173	1.30085	0.561012	1.0008	1.08817	0.680804	1.12679
CAMK2B-1	CAMK2B	x	0.876963	0.617925	0.596372	0.983092	0.815934	1.23249	1.04849	1.21053	0.97007	0.989181	0.843215	0.905132	1.3493	0.794926	1.10386	0.959596	0.997585	0.928899	0.70282	0.842407	0.6	0.624762	0.837209	1.02278	0.855346	0.527115	0.783262	1.02421	0.973597	0.847403	0.808511	0.84058	1.05919	1.15251	0.620026	0.870567	0.870091	0.905172	0.912145	1.16252	0.83871	0.640756	1.21033	0.662366	0.653361
CAMK2B-10	CAMK2B	x	1.12626	1.1863	0.787946	0.693237	1.03448	0.64	0.762105	1.04297	1.01035	1.05856	0.817669	1.14848	0.849873	0.678049	1.37421	1.30435	1.2	0.923434	0.560694	0.57265	0.62605	0.604072	0.591371	0.521912	0.558673	0.415987	0.610599	1.12092	0.772293	0.75303	0.496	1.00223	0.782609	0.861407	0.741158	0.90146	0.836735	0.546032	0.90625	0.786325	1.34423	1.34476	1.16923	1.70153	1.47379
CAMK2B-11	CAMK2B	x	0.803571	0.984402	1.01423	0.864775	0.829436	0.961656	0.732293	0.650286	1.11831	0.893756	0.957759	1.14188	0.929539	0.720721	0.820856	0.839683	1.71373	0.934921	0.772997	1.10324	0.966292	0.868613	0.651226	0.697226	0.901121	0.901496	0.93179	1.2396	1.16879	1.02079	1.11074	0.930124	1.10927	0.860215	1.05788	1.12821	1.17837	0.84007	0.94824	0.924554	0.935754	0.571078	0.849108	0.97486	0.789216
CAMK2B-12	CAMK2B	x	1.77778	0.991071	0.914027	0.813462	0.971678	0.955603	0.96888	0.975791	1.40678	0.758258	0.834254	0.858127	1.03407	0.853047	0.857143	0.913253	0.660118	1.0989	0.82381	0.798942	0.82381	0.920661	0.720379	0.853357	0.979381	0.574352	0.993639	0.976323	0.845827	0.950893	1.03529	0.569721	0.625604	0.814363	0.935792	0.764484	0.792271	0.907859	0.842752	0.721386	0.8875	1.09238	0.753012	0.523214	1.2577
CAMK2B-2	CAMK2B	x	0.652174	0.703645	1.33333	1.03204	1.06481	1.10095	0.758448	0.718894	1.03614	0.904433	1.2476	1.14224	1.40892	0.994907	0.878089	0.684466	0.810084	0.792776	1.2008	0.808587	0.785088	0.728412	0.912442	0.925419	0.443884	0.522059	0.375979	0.777884	1.09589	1.24575	1.11599	0.728296	1.19149	1.03464	0.739044	1.09217	0.898551	0.984934	0.793358	0.916005	0.855721	1.1654	0.597049	0.646766	1.16237
CAMK2B-3	CAMK2B	x	0.984668	0.92185	1.00915	1.13884	0.9374	1.09137	0.889503	0.764851	1.03325	0.782738	0.968539	0.926548	0.962006	1.06355	0.867403	0.809869	1.01849	0.881757	0.651163	0.724138	0.712707	0.790251	0.526387	0.616264	0.5	0.326596	0.834387	0.875776	0.954955	0.883764	0.784593	1.31947	0.588	0.989562	0.780763	1.14842	0.575972	0.875696	0.626923	0.902299	1.07224	1.21329	1.08736	1.04309	1.331
CAMK2B-4	CAMK2B	x	1.19439	1.24314	1.36673	1	1.0396	1.02644	1.44436	1.24256	1.20547	1.18225	1.03754	0.980047	1.30317	1.0317	1.27561	1.43568	1.59846	1.26113	1.49125	1.42234	1.3241	1.07104	1.34136	1.26379	1.38346	1.21156	1.33489	1.17035	1.17136	1.03679	1.50349	1.17817	1.04493	1.06565	1.68421	1.30932	1.07983	1.06725	1.33593	1.33514	1.03451	1.59164	1.09752	1.30591	1.41779
CAMK2B-5	CAMK2B	x	0.885246	1.08772	1.27855	1.00314	1.02817	1.11803	1.05312	0.797066	0.865741	1.34382	0.944773	0.954365	1.25697	1.24735	1.3554	1.31613	1.24928	0.967647	1.00763	0.657534	0.945652	0.804348	1.02466	1.43671	1.16744	0.821516	1.24183	0.904587	0.761141	1.0423	0.886364	1.08075	1.32402	1.40045	1.33121	1.26582	1.44118	0.981752	1.2971	1.5	1.52163	1.52956	1.41414	1.5625	1.91626
CAMK2B-6	CAMK2B	x	1.06349	1.17555	0.839416	1.03911	0.971698	1.07637	1.19955	1.07767	0.876686	0.737609	1.07453	1.06927	0.978456	0.914601	1.13184	1.01425	0.884831	0.985119	1.36201	0.903846	1.23454	1.23299	1.42038	1.41943	0.580499	0.675799	0.551852	0.719755	1.31229	1.16167	1.18863	1.15775	1.17028	1.03882	1.01274	0.974093	1.3741	0.935811	1.01024	1.08367	0.896353	1.14387	0.822709	1.12092	0.978686
CAMK2B-7	CAMK2B	x	0.472362	0.449275	1.57229	0.876652	0.933852	0.776471	1.52574	0.938776	1.26766	0.861671	0.801829	0.73913	1.07063	0.801394	0.889868	0.876543	0.976852	1.01709	0.744493	1.07447	0.691011	1.02951	0.722603	0.521519	1.26543	1.71676	0.490347	1.50303	1.0101	0.753659	1.48558	1.17453	1.61084	0.733333	0.96587	0.967302	0.78534	0.953917	0.599057	0.817121	1.2651	0.75	0.319066	2.02349	1.38214
CAMK2B-8	CAMK2B	x	1.1223	0.909256	1.03951	1.2518	1.26521	1.21106	1.10181	0.97954	1.18905	1.12303	1.36607	1.06893	1.35147	1.40422	0.990489	1.19088	0.926829	0.93345	1.24092	1.18593	1.44078	1.28767	1.24936	1.09713	1.15549	1.2219	1.02718	1.01207	1.09256	1.13113	1.53391	0.887805	0.923767	1.11196	1.28284	1.49665	1.02957	1.25536	1.31373	1.10675	0.936842	0.842105	1.53497	1.08421	0.861244
CAMK2B-9	CAMK2B	x	1.22157	1.23642	1.2716	1.11321	1.02333	1.15615	1.14555	1.82166	0.93299	1.36343	1.57437	2.36989	0.819572	0.702233	1.05205	1.18089	1.14663	0.598315	1.69068	1.52381	1.67073	1.21945	1.2069	1.36893	1.58696	1.25467	1.7799	1.03252	1.31157	1.13406	0.675862	1	1.0277	1.23002	0.861624	0.913559	1.01404	1.06159	1.09091	1.13684	0.768898	1.238	0.797895	0.326134	0.825336
CAMK2D-1	CAMK2D	x	1.273	0.973643	1.06812	0.937018	1.06746	0.995929	1.35473	1.56026	1.18216	0.944134	0.967023	1.07427	1.159	0.966811	1.20856	0.744012	0.959877	0.928058	1.2305	0.877778	1.11261	1.0617	1	1.0418	1.34153	1.06868	0.931925	0.973137	1.01692	1.12727	1.82014	1.07407	1.21815	1.01818	1.34548	1.0844	1.04594	0.910747	1.08113	0.881841	0.91468	0.991552	0.896766	0.686324	1.12355
CAMK2D-10	CAMK2D	x	0.898936	1.0201	2.17919	1.24476	1.35507	0.910053	1.25701	1.36493	0.927083	1.02091	1.58333	0.975	0.809783	0.98913	1.35673	0.895833	0.508021	0.526627	1.41259	1.02959	1.07738	1.36441	1.01961	0.877395	0.948864	0.37788	1.35315	0.542763	0.843854	0.605714	0.66129	1.60526	1.6358	1.26047	1.6646	1.15827	1.1773	0.941935	1.66	0.874494	0.958506	0.722449	0.526316	1.51452	1.12653
CAMK2D-2	CAMK2D	x	1.09859	0.836207	0.952756	0.877358	1.13141	1.21379	1.03448	1.01367	1.3598	1.25265	1.15165	1.00795	1.19006	1.14946	1.18625	1.10289	1.12827	1.1155	1.00333	0.801347	1.14865	0.851931	1.61905	0.841304	1.71237	0.990119	0.948718	1.07407	0.931857	0.821068	1.41751	1.92771	0.88024	0.82205	1.02049	1.1106	1.06434	0.915493	1.44713	0.879406	0.84542	1.02286	0.701299	1.05534	1.09333
CAMK2D-3	CAMK2D	x	1.04615	1.57778	0.369863	1.02247	0.769912	0.886598	0.405405	2.21951	0.569106	0.994048	1.10145	1.43182	1.22973	1.32292	1.14815	1.5625	0.626866	1.83673	0.905172	0.900901	0.873786	1.03676	1.352	1.33582	0.88785	0.37931	2.13592	2.25	0.809524	0.733333	0.697674	1.65823	0.565217	0.982456	0.405594	1.88806	1.41667	1.92982	1.77273	0.713043	0.0825688	1.17045	1.27826	0.559633	0.795455
CAMK2D-4	CAMK2D	x	1.35461	0.96789	0.748865	0.9573	0.967504	0.819261	1.11772	1.15534	0.879108	0.984891	1.01487	1.11759	1.12175	0.860955	0.926267	1.21141	1.09692	0.641538	0.856089	0.968121	0.974026	0.716571	0.882939	1.05438	1.08353	0.924779	0.961905	1.21384	1.19163	0.882812	1.37537	1.08577	1.46677	1.00105	1.12628	0.770076	0.813036	0.756554	0.889091	0.996032	1.65955	1.11661	0.578042	1.09746	0.941107
CAMK2D-5	CAMK2D	x	1.16877	1.21026	0.913747	0.802233	1.01301	0.880368	1.25134	1.13324	1.09893	0.929093	0.959315	1.01444	0.949772	0.860534	0.642287	1.08656	0.923623	0.9375	1.03315	0.981356	0.846505	1.25703	0.76815	0.924205	0.634573	1.02821	1.37383	1.04179	1.05972	0.996967	1.63242	0.538341	1.02769	0.965481	0.943329	0.842786	1.22379	1.10526	0.799642	1.20411	0.718619	0.925885	1.19444	0.782427	0.942478
CAMK2D-6	CAMK2D	x	0.69163	0.868313	1.53333	1.05797	0.880109	1.05016	1.2669	0.621849	0.751462	1.1606	0.889299	0.912621	0.835616	1.06091	0.787529	0.670886	0.718367	1.15745	1.0169	0.971347	1.14169	1.00654	0.812367	1.17949	1.55031	0.71875	0.997199	0.886842	0.96748	1.30707	2.27027	0.311111	0.894495	0.79223	1.29501	0.813264	0.932292	0.674419	0.584821	0.950355	0.833333	0.651163	1	0.646893	1.12957
CAMK2D-7	CAMK2D	x	0.573099	0.806452	1.14147	1.23543	1.17181	0.972549	1.28336	0.983923	0.774448	1.1881	0.994109	1.0882	0.541391	0.96371	0.893502	0.756385	0.902542	1.28238	1.17692	0.867965	0.781863	0.933333	0.910924	0.745514	1.39792	1.5156	1.09076	1.0183	0.921084	0.86899	1.41357	0.868009	1.05894	0.814341	1.53007	0.735714	1.00696	1.14663	0.966851	1.1885	0.695105	0.597015	0.829073	0.577622	0.716418
CAMK2D-8	CAMK2D	x	1.4695	1.22299	2.36695	1.05913	1.06093	1.07437	1.43051	1.29712	1.17304	1.3649	1.15571	1.19269	1.13402	1.05119	1.27235	1.61196	1.30408	1.04327	1.31395	1.57333	1.54315	1.24635	1.18367	1.16994	0.805048	0.981409	0.864475	1.17518	1.10155	1.19983	0.91678	1.5997	1.07835	1.12399	1.00767	1.27957	1.63149	1.09604	1.55077	1.08065	1.4713	1.31608	1.2172	1.35448	1.7511
CAMK2D-9	CAMK2D	x	1.04669	1.35587	1.31225	0.939394	1.13944	1.22018	1.51786	1	0.841216	1.52395	1.37237	1.12188	0.79646	0.79868	0.844765	1.3972	1.40306	1.09639	1.8087	1.2915	1.112	1.8127	1.28966	0.845946	0.927052	0.983333	0.643002	1.06549	1.43622	0.982051	1.44444	0.848889	0.957692	1.51735	0.801546	1.20282	1.33503	1.4	1.25269	0.805479	0.922865	0.946479	1.0274	1.05234	1.0169
CAMK2G-1	CAMK2G	x	1.08056	1.05764	0.905149	1.26772	1.02069	1.3122	1.45057	1.22676	1.38493	1.05935	1.01937	1.04803	1.21825	1.29691	1.69195	1.36592	1.63764	1.23433	0.969626	0.780645	1.28857	0.864909	1.4191	1.22889	1.35893	1.84576	2.32347	0.712519	0.950081	1.10756	1.14286	1.74815	2.43802	1.07515	0.984962	1.13393	1.17989	1.48012	1.60119	0.758555	0.868182	0.73357	1.04183	1.24318	0.62167
CAMK2G-10	CAMK2G	x	0.809963	0.669405	1.07425	1.0533	0.99004	1.0101	0.969565	0.660656	1.12375	0.806135	0.897172	0.696406	0.801835	0.93838	0.875839	0.970944	1.12946	0.958416	1.0788	0.811741	0.915718	0.747253	1.02796	0.90367	0.762951	1.28786	1.2795	0.972286	1.09025	1.16435	1.34105	0.850427	1.23164	0.797312	0.752784	0.902204	0.564706	0.738208	0.859524	0.870216	0.824484	0.82284	0.958403	0.830383	0.505124
CAMK2G-11	CAMK2G	x	0.857143	1.17681	0.94152	1.3375	1.04902	1.04321	0.935484	1.41191	1.16053	1.05353	1.08173	0.674888	0.859238	1.35855	1.14724	1.04965	1.01897	1.11326	0.851613	0.967273	0.987654	0.986737	1.03665	1.22396	0.631944	0.925743	1.34492	0.962766	1.02778	1.21442	0.893939	1.10479	0.925926	1.20362	0.942431	0.826255	0.968531	1.16828	1.09934	1.03198	1.32272	1.3418	0.633262	0.632696	1.72055
CAMK2G-12	CAMK2G	x	0.457055	0.793706	1.11765	0.681818	0.635057	0.678679	0.742931	0.825444	1.49324	0.748227	0.93177	0.898524	0.475962	0.547619	0.977987	0.617363	0.882591	0.847222	0.45	0.552408	0.713793	0.638393	0.718487	0.943052	0.76462	0.450467	0.812207	0.650759	0.303901	0.874126	0.591078	1.1102	1.1281	0.669291	0.991342	0.649329	0.931818	0.904382	0.611765	0.725061	1.17108	0.63	0.588808	1.24819	0.465
CAMK2G-2	CAMK2G	x	0.708039	1.19185	0.724138	0.836127	0.951586	1.05893	1.03233	1.07937	1.14713	0.957282	1.03125	1.09553	0.871452	0.852772	0.966549	1.16845	1.34122	1.19802	1.14602	0.833333	0.751786	0.962238	0.904822	0.915119	1.3758	0.685015	1.53414	0.945437	0.954503	1.13703	0.933135	1.2408	0.97541	0.96904	1.07843	0.840485	0.956822	1.05927	0.928287	1.24883	1.07245	1.04839	1.34038	0.873765	0.786866
CAMK2G-3	CAMK2G	x	0.806061	0.873817	0.867717	0.984375	1.03644	1.18028	1.24111	1.34936	1.02593	0.922314	0.747547	0.871522	0.825627	1.31934	0.93118	0.827316	1.03261	1.13731	0.770972	0.947967	0.816746	1.03463	1.07582	1.04465	0.907339	1.03958	1.01469	0.907634	0.928312	1.04965	1.03896	1.29955	1.73953	0.927699	1.1397	0.824733	0.94052	0.92365	1.06679	0.675589	0.949677	1.00775	0.664882	0.762581	0.99354
CAMK2G-4	CAMK2G	x	0.838608	0.602058	0.767677	0.816694	0.97615	0.978873	0.799207	0.715339	0.84739	0.93599	0.733967	0.665222	1.05664	0.836066	1.04355	0.957672	0.7	0.918367	0.632588	0.68932	0.666027	0.843709	0.625798	0.687758	0.661853	0.783471	1.29953	0.850153	1.04014	0.891282	0.837748	1.08099	1.16774	0.621103	0.67425	0.663182	0.611222	0.617706	0.706587	0.499356	0.734793	0.757946	0.535393	1.01217	0.541565
CAMK2G-5	CAMK2G	x	1.0388	1.0129	1.2228	1.1509	1.10855	0.829625	1.06941	1.0767	1.23288	1.09683	1.24505	0.952296	1.07813	1.10067	1.27747	1.14398	1.35302	1.1525	1.03528	1.09705	1.33593	1.24961	1.10399	1.31043	1.4872	1.42638	1.5496	1.17374	1.03787	1.00389	1.33888	1.08075	0.809749	1.09271	1.1156	1.21136	0.873635	0.943047	0.818991	1.143	0.958273	0.953941	0.943712	0.870936	1.07882
CAMK2G-6	CAMK2G	x	1.27599	0.614583	1.08904	0.761773	0.892405	0.938416	0.601504	0.933673	0.883523	1.05769	1.13889	0.886	1.44534	1.05319	0.924925	1.03237	2.06923	1.48201	0.794366	0.82963	0.834951	1.18011	1.075	0.715054	1.40299	1.20174	0.38061	0.907692	0.806742	0.795547	0.715867	1.90058	0.694215	0.80334	0.543814	1.40732	0.782805	0.823045	1.26818	0.787952	0.691943	0.8125	1.51084	0.604265	1.23798
CAMK2G-7	CAMK2G	x	0.553009	0.719603	0.575198	1.03971	0.852564	0.878125	1.12088	0.842301	0.74115	0.736739	0.808279	0.663636	0.671598	0.548469	1.07942	0.893665	0.896359	1.02397	0.405405	0.427152	0.630499	0.734748	0.872941	0.718905	0.675676	1.04702	0.612795	0.829103	0.819334	0.684116	1.08101	1.51124	1.07622	0.984962	0.793033	0.844961	0.450704	0.548589	0.554098	0.691983	1.69955	0.762279	1.05485	1.18161	1.39293
CAMK2G-8	CAMK2G	x	0.805121	1.15889	1.02921	1.18501	1.06836	0.894345	0.860048	1.03185	0.965197	1.23553	1.26846	0.980574	0.73121	0.748731	0.903704	1.1104	0.962963	1.15075	0.688623	0.682749	0.866913	1.08355	1.14576	0.941793	1.25588	0.482821	0.697383	0.984601	0.97971	1.03472	1.07066	1.25997	1.31537	0.861	0.885312	0.940083	0.932234	0.808664	0.914934	1.02049	0.932026	0.739573	0.928297	0.784314	0.808749
CAMK2G-9	CAMK2G	x	0.608247	0.902465	0.576967	0.839731	0.880874	0.913966	0.686644	1.01269	0.856144	0.710298	0.752489	0.810775	0.795964	0.665979	0.7	0.938519	0.823745	0.730724	0.635928	0.564324	0.560411	0.940072	0.631491	0.78853	0.618788	0.845594	1.06495	0.969633	0.756827	1.12252	1.36098	0.832753	0.666667	0.75196	1.0536	0.757339	0.797994	0.74903	0.676	0.714726	0.727353	0.967132	0.74017	1.24099	0.963024
CAMK4-1	CAMK4	x	0.946827	1.35088	0.944444	0.842014	0.945161	0.929329	0.7875	0.987688	1.1934	0.864294	1.24029	1.05909	1.35946	0.933237	1.12816	0.744643	0.930159	0.976431	0.949219	0.825427	1.03095	1.21951	1.17968	1.19938	0.892393	1.0951	0.937337	1.25026	1.00495	0.931731	1.07131	0.612853	1.26837	1.23944	0.991543	0.957062	1.28324	0.753846	0.835878	0.645777	1.12205	0.716312	0.950954	1.6916	0.799054
CAMK4-10	CAMK4	x	1.03012	1.17778	0.879032	0.961538	1.13365	0.973029	0.94382	1.09716	1.03258	1.18329	1.0764	1.19053	0.867816	0.895575	1.07292	1.07229	0.907942	0.844156	1.22523	0.927313	1	0.938436	0.965138	0.968553	1.17114	1.72149	2.54489	1.04134	0.784131	1.18702	0.906191	0.734043	1.3438	1.31308	1.09795	1.18463	0.971014	1.01765	0.894422	1.52055	1.05402	1.29224	0.86758	0.984765	1.6895
CAMK4-2	CAMK4	x	0.746398	0.771454	1.08614	0.960094	1.00363	0.916225	0.725723	1.01275	0.910769	0.959864	0.942921	0.75894	0.765288	0.937701	0.777563	0.854398	1.09284	0.94693	0.693034	0.637712	0.91185	1.19544	1.24167	1.16978	0.823794	0.756166	1.40724	0.958974	1.23492	0.825784	0.957627	0.606773	1.34352	0.945106	1.15793	0.998651	1.05239	0.976061	0.847568	0.947254	0.938615	0.997122	1.17558	0.920057	1.20144
CAMK4-3	CAMK4	x	1.14318	1.32941	1.45102	1.03209	0.979021	0.88009	0.635401	0.958763	0.983051	1.20626	1.02515	1.04235	1.19844	1.22011	1.29424	1.67692	0.85426	0.771552	0.841518	1.21321	0.891738	1.29688	1.29982	1.16135	1.33636	1.02288	0.88284	1.00394	1.04609	1.20584	1.12984	1.73621	1.24944	1.62045	1.42037	0.973651	1.0099	1.1995	1.06683	1.12044	1.87873	1.38503	0.835766	2.51494	1.7148
CAMK4-4	CAMK4	x	0.777778	1.91045	1.33192	1.06928	0.940299	0.940618	1.05907	0.725458	0.968595	1.15523	1.11913	1.30216	1.22829	1.04167	1.27094	0.771712	0.712274	1.13743	0.978873	0.823666	1.07416	1.19333	1.25566	1.47732	1.2391	1.39907	1.35189	0.945946	1.24697	1.10891	1.25123	1.31519	1.31156	1.0197	1.25348	1.09287	1.36559	1.31467	1.05367	1.10929	1.04038	1.36969	1.03279	1.67885	1.03142
CAMK4-5	CAMK4	x	1.78913	1.9469	1.56448	0.857411	1.04139	0.967433	1.18494	0.935374	0.940407	1.46248	1.0887	0.845088	0.837104	1.19802	0.803383	1.20716	1.18859	1.18009	0.976359	1.06425	1.16804	1.04682	1.01058	1.22203	1.48718	2.51533	1.08764	0.760529	1.12017	0.991329	0.634744	1.03607	0.628571	0.802057	1.13433	0.910878	0.945274	1.20554	1.20096	0.916357	1.373	1.01942	1.42937	0.989343	1.03236
CAMK4-6	CAMK4	x	1.45841	1.10491	1.08295	0.781011	0.971275	0.835637	0.82868	1.16947	1.36969	1.07701	1.18373	0.812053	0.698413	1.02419	0.90708	1.4625	1.18683	0.99292	0.770833	0.972917	0.964015	1.1717	1.01186	0.955071	0.823872	1.1459	1.20501	0.982949	0.865156	1.01076	1.22	0.99509	0.993579	1.19979	1.36384	0.951554	0.961224	1	0.815742	1.12916	1.54294	0.97426	0.996164	1.68837	0.911197
CAMK4-7	CAMK4	x	1.38168	1.24816	1.04239	0.995122	0.911227	0.844907	1.47027	1.28782	1.00159	1.10909	0.82363	0.7642	1.52234	0.803097	0.984576	1.40769	1.23099	1.42338	1.03205	0.965217	1.06319	0.942993	1.07159	0.858744	1.04688	1.08532	0.890152	1.09524	0.841538	0.913978	0.607792	0.734824	1.312	1.01097	0.91945	1.34597	1.14634	1.21212	0.926027	1.59302	1.0119	1.24112	1.46124	1.15816	1.33458
CAMK4-8	CAMK4	x	1.29916	0.79329	1.55789	1.04418	0.903305	0.842424	1.07776	0.841897	0.813402	0.910977	0.932971	0.935943	0.852608	1.22258	0.954442	1.048	0.968714	0.72033	0.851182	0.881215	0.661623	0.758621	0.773516	0.956522	0.982709	1.46499	1.74433	0.983088	0.850736	1.21647	1.38571	0.870101	0.974296	1.14286	0.794379	1.0034	1.12245	1.10157	0.920635	1.2668	1.16934	0.78648	1.70497	0.830658	0.748557
CAMK4-9	CAMK4	x	1.19214	2.10256	1.34694	1.15951	0.92228	1.10215	1.00402	1.0549	0.862573	0.971591	0.758152	0.673522	0.656442	1.28889	0.75	1.18557	1.42381	1.11828	0.774566	0.75	1.51724	1.52336	1.6439	1.20949	0.47234	0.99661	1.18274	0.763407	1.56014	0.932961	3.49254	0.272727	1.21327	0.920489	1.99074	1.56175	0.700508	0.653846	1.11892	1.33841	1.22433	0.853571	1.19512	1.34221	0.914286
CAMKK1-1	CAMKK1	x	0.775785	0.774775	1.19289	0.843318	1.10732	0.867188	1.77619	0.903101	0.66323	0.858491	1.01689	1.2884	0.880952	0.825243	1.24752	1.44242	0.911765	0.938596	1.32599	1	1.37327	1.19136	0.941003	1.41732	1.04114	2.46032	0.647727	0.867978	0.883853	0.913953	2.81437	0.258197	0.641791	1.29355	1.15916	1.30952	0.80102	0.777202	0.956098	0.606272	0.996732	1.27178	0.721254	0.901961	0.804878
CAMKK1-10	CAMKK1	x	0.868687	0.822496	0.917485	0.93038	0.927273	0.699801	0.36425	0.626482	0.335453	0.770341	0.780096	0.769912	0.572193	0.756661	0.646739	1.01751	0.750572	0.680244	0.62766	0.73	0.653105	1.07453	0.859583	0.797678	0.969646	0.692308	0.926544	1.2176	0.707196	0.955381	0.957684	1.35514	0.604374	0.900815	0.691695	1.5282	1.15267	0.828502	0.819026	0.620253	0.649852	0.850482	0.787623	0.833828	0.991961
CAMKK1-11	CAMKK1	x	0.669866	0.611973	0.539278	1.03385	0.682243	1.06383	0.619965	0.671103	0.520376	0.912214	0.887023	0.794702	1.08815	0.719409	0.96028	1.13447	0.982544	0.77951	0.68623	0.747449	0.675615	0.985417	0.784854	1.03781	0.3824	0.760116	0.897436	0.852482	1.00424	0.819945	0.693512	0.663984	0.932039	1.07225	0.977778	1.02277	0.694639	0.939633	0.860911	0.787004	1.62715	0.843994	0.646209	1.64605	0.386895
CAMKK1-12	CAMKK1	x	0.81039	1.10353	1.06061	1.18204	0.963504	1.01558	0.902299	0.728597	0.561728	1.24035	0.985413	0.970248	0.843823	0.820926	1.04384	1.2611	1.00988	0.920892	0.962644	0.873926	0.895238	0.902004	0.888676	0.909722	0.887446	1.25112	0.977186	1.09318	1.39319	0.861886	0.909756	0.870968	1.03409	1.10681	1.24655	1.08166	0.752187	0.946927	1.09756	1.09423	0.881579	1.11949	1.46538	0.873355	1.22794
CAMKK1-2	CAMKK1	x	1.72676	1.20448	1.5503	1.17277	1.13092	1.18712	1.20195	0.822355	0.807933	1.05293	0.99005	1.42264	1.19767	1.1911	1.10803	1.10278	1.27035	1.23229	1.08108	1.32168	0.98806	0.795276	1.22	1.33949	0.990719	1.11818	1.70919	0.965465	1.26882	1.12121	1.00552	1.66667	1.46875	1.21857	0.994083	1.31215	1.10989	0.982143	1.35897	1.07321	1.17893	0.890323	0.928571	1.45129	0.979032
CAMKK1-3	CAMKK1	x	1.06774	0.779553	0.893617	1.20064	1.03915	1.14194	0.677928	0.776892	0.878947	1.22609	0.812408	0.87931	1.03371	0.994737	0.95107	0.78125	1.68027	1.19454	1.11864	1.173	0.981873	1.24933	2.10345	1.38346	2.78771	1.29002	3.09821	0.985375	1.10142	1.04122	0.927419	0.898352	1.10927	1.21008	1.85467	0.964602	0.796364	0.79288	0.90458	1.12755	1.11358	1.08553	1.16582	1.34074	0.960526
CAMKK1-4	CAMKK1	x	1.10543	1.02888	1.10955	1.00322	0.990726	1.02142	0.730094	0.629902	0.505481	0.95572	0.964753	0.952987	1.025	0.998523	1.07934	1.09044	1.21714	0.869362	1.02051	1.10274	0.868827	1.10192	0.848558	1.07095	0.892717	1.01943	1.1049	1.02264	1.1567	1.25641	0.984917	1.68512	1.18343	0.865904	1.1098	0.879131	0.992857	0.951613	1.01439	1.06463	1.01848	0.785794	1.18049	0.953811	0.761376
CAMKK1-5	CAMKK1	x	1.13556	1.09211	1.21406	1.09651	0.819967	1.08048	0.75502	0.476119	0.320203	0.891972	0.867397	1.03906	1.06354	1.05593	1.19584	0.651584	0.965642	1.1469	0.861417	0.767594	0.987296	0.987032	1.00681	0.861272	0.725446	1.0771	1.47681	0.985201	0.915628	1.04634	0.725758	0.886218	1.63796	1.07887	1.12992	0.898642	0.945255	0.749543	1.13201	1.15107	1.19651	1.24457	1.23529	0.618632	1.13587
CAMKK1-6	CAMKK1	x	2.325	1.72826	0.72428	1.21333	1.13433	1.04977	0.661538	0.626168	0.740634	1.18895	0.922222	1.03198	1.28244	1.21923	1.12371	0.859903	1.19048	1.44633	1.13011	1.30435	0.849057	1.46689	1.11144	1.51803	0.670481	1.53709	1.48756	1.0885	1.21357	1.15761	0.75	1.564	1.19512	1.44675	1.12736	1.15699	1.46114	1.06278	0.898396	0.337423	1.57751	0.685629	0.693252	0.826748	1.03293
CAMKK1-7	CAMKK1	x	0.568314	0.579974	0.782095	0.867198	0.794012	0.831776	0.305242	0.22291	0.468137	0.832657	0.686795	0.616259	0.538667	0.430736	0.561798	0.231593	0.340176	0.28855	0.527246	0.484694	0.409704	0.54928	0.559081	0.501988	0.718367	0.431548	0.771488	1.05352	1.17703	1.04719	0.299611	0.270936	0.508844	0.953704	0.972812	0.967577	0.503226	0.637398	0.608197	0.60093	0.840642	0.478507	0.711628	0.724064	0.410633
CAMKK1-8	CAMKK1	x	0.774744	0.84913	0.740952	0.980072	0.964015	0.823529	0.540426	0.540698	0.471049	0.702732	0.933813	0.935948	0.958781	0.841912	0.702403	0.725191	0.970588	0.559859	0.97379	0.831984	1.08214	1.07692	1.08555	1.14072	0.497338	0.493812	1.4019	0.833333	1.02113	0.944146	0.47505	1.17365	1.09672	0.914172	1.07799	0.770855	0.878049	1.43823	0.877016	0.626632	0.950581	1.18003	0.828982	1	1.29955
CAMKK1-9	CAMKK1	x	0.60354	0.829126	0.690397	1.06713	1.08537	1.06618	0.323204	0.693709	0.653846	0.935049	0.737687	0.669028	0.764151	0.768678	0.730435	0.943601	0.778163	1.1762	0.917671	1.06522	1.1629	0.860399	1.05571	0.967742	1.18487	0.702674	0.953237	0.892189	0.884386	0.992308	0.772455	1.04906	0.946581	0.939666	0.790828	0.910608	0.889688	0.835165	0.929245	1.04085	0.979381	1.07837	1.06808	1.24006	1.04232
CAMKK2-1	CAMKK2	x	0.647969	0.521569	0.75	0.789256	0.885593	0.786058	0.41286	0.764808	0.583201	0.83908	0.937407	0.588034	0.874251	1.04706	1.01217	0.855856	1.14461	1.13563	0.891892	0.99458	0.865079	0.826568	0.827935	0.660839	0.621818	0.87276	0.973011	0.639241	0.862745	1.02703	0.673152	0.394068	1.21724	1.12786	1.07091	0.52965	0.947598	0.740125	0.985542	0.764359	0.728477	0.917369	0.802651	0.587748	0.58516
CAMKK2-10	CAMKK2	x	0.882883	1.22807	0.774327	1.1561	1.00483	0.995816	0.839939	1.09509	1.15814	1.1763	1.00316	0.910217	1.22511	0.935543	1.04034	0.921776	0.983529	1.07385	0.868304	0.654008	0.835821	0.971537	1.08494	0.962233	0.945946	0.890541	1.38958	1.29321	0.988532	1.10723	0.909465	1.15	0.993103	1.205	1.19262	1.21517	1.29592	1.04054	0.734831	1.27788	0.987887	1.48341	1.25487	1.2786	1.03896
CAMKK2-11	CAMKK2	x	1.07372	0.507163	0.96679	1.19087	0.744027	0.650568	0.610127	0.809392	0.692063	1.32412	0.985507	0.644231	0.665753	0.629508	0.976608	1.328	0.851449	0.609562	0.67052	0.983471	0.639881	0.685039	0.777778	1.06863	0.571782	0.699284	1.32086	0.649706	0.933194	0.806324	0.898551	1.06431	1.55352	0.951327	0.927505	0.97191	0.656652	0.940476	0.986667	0.855072	1.07792	0.710526	0.997101	0.857143	1.21531
CAMKK2-12	CAMKK2	x	1.00517	0.75594	1.1954	1.0525	0.852459	1.00637	0.748246	0.984531	0.939171	0.91267	0.834002	0.899054	0.727273	0.915138	0.951768	0.860898	0.713951	0.888611	0.949202	0.900958	0.775393	0.888053	0.789876	0.8199	0.880509	0.570755	0.958427	0.896447	0.934192	0.855224	0.793991	1.13396	1.12567	1.15671	0.742761	0.753846	0.919728	0.803752	0.744253	1.03779	0.710993	0.886408	1.01567	0.74734	1.04078
CAMKK2-13	CAMKK2	x	1.01928	0.689815	1.39267	0.921212	1.13043	0.983003	0.91502	0.836493	1.02252	0.772887	0.99154	0.919877	1.46649	1.39623	1.31078	1.04819	0.783133	0.791563	1.56	1.02319	0.826748	1.16228	1.19652	1.0406	1.20455	0.54512	1.20494	1.02003	0.949464	1.20661	0.802784	1.06733	0.651054	1.23327	0.620853	0.951351	0.995074	0.997143	1.28197	0.826347	0.545455	1.17782	1.20559	0.309478	1.18486
CAMKK2-2	CAMKK2	x	0.943689	0.772374	0.656716	1.22603	0.980851	1.07937	1.1446	0.824159	1.29675	0.869159	0.93484	0.897856	1.3895	1.34086	1.09624	1.01016	1.00866	1.11134	1.48118	0.856209	0.891827	1.20796	1.26602	1.35971	1.2275	0.613668	0.974446	1.02392	1.68983	0.995062	1.11674	1.32916	0.770398	0.968314	1.04706	1.10094	0.987685	1.34625	0.821586	1.05132	1.48226	0.683761	1.12317	1.23871	0.549858
CAMKK2-3	CAMKK2	x	0.786164	0.694864	1.62246	1.20097	1.13833	1.01065	0.758573	0.73713	0.852941	0.736892	0.85839	0.784369	0.865653	1.10935	0.969032	0.776184	0.78811	0.784185	0.819209	0.761347	0.600297	1.03337	1.0068	0.968009	0.873223	0.668675	0.478745	1.0084	0.63488	0.837478	0.8429	0.350614	0.593081	0.951341	1.26494	0.794033	0.742809	0.690189	0.626817	1.03632	0.962919	0.680808	1.50726	0.850478	0.709091
CAMKK2-4	CAMKK2	x	0.96	0.912114	1.32229	1.12036	1.20722	0.986339	1.01835	1.11746	1.23152	1.24915	0.774419	1.07824	1.12396	1.26471	1.2147	1.04837	1.02621	0.933333	1.13885	1.10384	1.09677	1.36374	1.20766	1.03575	0.971292	0.473973	1.44055	1.07253	1.14085	1.0316	0.92399	0.619952	1.00468	1.15996	1.06167	0.940217	1.06646	0.945428	1.10753	1.35122	1.48643	1.03529	0.90439	1.29749	1.13824
CAMKK2-5	CAMKK2	x	0.909976	1.23214	0.874687	1.26503	0.863402	1.261	0.437262	1.14251	0.963964	1.10454	1.02222	0.888889	0.871377	0.923497	0.79476	1.17737	0.870317	1.00505	1.08631	1.10123	1.31488	1.33265	0.984848	1.39514	0.973535	1.36768	2.06651	1.08739	1.0104	1.15596	0.438596	0.91453	0.808642	1.03892	0.62454	1.03417	1.00929	0.869697	1.27356	0.821892	0.902	0.867052	0.879406	1.266	1.02312
CAMKK2-6	CAMKK2	x	0.973262	1.2186	1.82796	1.61026	1.11892	1.03571	0.83045	0.410494	0.892216	0.858757	0.888545	0.996835	1.08295	1.24022	1.46667	0.780952	1.13115	0.797872	0.821429	1.15707	1.15344	1.1245	1.02593	0.632353	0.679245	0.887446	2.749	0.991329	0.939726	0.963087	1.15385	1.29902	1.22024	1.24092	1.28041	0.734536	0.847716	1.11628	1.14024	1.01953	1.09028	1.31058	1.33594	0.895833	2.85324
CAMKK2-7	CAMKK2	x	1.0784	0.98169	1.25322	1.16973	0.983923	1.10577	1.13685	1.21625	1.20433	1.22194	1.20741	0.976645	1.31771	0.988889	1.31355	1.48166	1.13966	1.19392	1.23891	1.52941	1.22204	1.4161	1.13296	1.2688	1.2362	0.880671	1.10638	1.10843	1.26122	0.813516	1.00566	0.615922	0.964933	1.11798	0.826439	1.3712	1.40924	1.16135	1.10702	1.64209	1.24594	1.73239	1.50416	1.35963	1.23944
CAMKK2-8	CAMKK2	x	0.656904	0.790598	1.18776	0.958848	0.875	1.04825	0.713287	0.627976	0.727273	0.827027	0.429648	0.720721	1.2952	0.527273	0.6337	0.514085	0.715356	0.744186	0.533333	0.730924	0.776471	0.954839	0.645161	0.931818	0.481043	0.503546	0.905077	0.85084	0.79405	0.749373	0.422297	0.475083	1.49638	0.658667	0.648472	0.718519	0.425439	0.642534	0.472222	1.12862	1.45981	1.03143	1.41479	2.56913	0.908571
CAMKK2-9	CAMKK2	x	1.06875	1.19675	1.0616	0.997717	1.04299	1.12057	0.759411	1.22167	0.986183	1.07761	0.870787	0.739974	1.07095	0.998047	0.980969	0.881928	0.735499	1.55462	1.23333	1.22947	0.88914	0.985915	0.905145	1.16988	0.495021	0.875957	1.07647	1.04388	0.920781	0.908397	1.4235	1.29806	1.17063	1.13663	0.854795	0.984709	0.988067	0.805164	0.7375	1.22979	0.97561	0.512579	1.07448	0.984756	0.300314
CAMKV-1	CAMKV	x	1.23048	1.08453	1.19792	1.06764	1.16914	1.10163	1.33284	1.09925	1.20122	1.12697	1.51588	1.12187	0.987654	1.42054	1.35249	1.08506	1.3767	0.824953	1.28434	0.899267	0.996212	1.03891	1.02296	1.31791	1.28801	1.82659	1.18329	1.15507	1.14526	1.24475	1.025	0.89375	1.15876	1.17549	0.955044	1.11288	1.00674	0.807547	0.933174	0.756	1.33242	1.04403	0.774667	1.81943	1.00568
CAMKV-10	CAMKV	x	1.08713	1.34927	1.02234	1.087	1.11232	0.942857	0.775646	1.03733	1.02405	1.0409	0.922715	1.01281	1.17729	1.26714	1.05375	1.00098	0.965449	0.985743	1.23231	1.32497	1.53902	1.02131	1.19215	1.12429	1.09457	0.765988	1.16642	1.13125	1.09585	1.15353	0.872967	0.922179	0.97955	1.01298	1.08499	0.951553	1.10913	1.21013	1.10867	0.955927	0.888153	1.07604	1.10334	0.863135	0.835725
CAMKV-2	CAMKV	x	0.93266	1.66667	1.53571	1.10455	0.935644	0.943478	0.620915	1.0888	1.04484	1.14516	1.02639	1.33413	1.24907	1.06463	1.01402	0.832599	1.61135	0.970464	0.9375	1.32768	0.962343	0.829721	1.18794	1.32046	0.857576	0.583784	0.803226	1.23622	0.909621	1.26934	0.469841	1.12791	1.07222	1.34643	1.12195	0.879487	1.20652	1.13661	1.24413	0.690852	0.482659	1.54545	1.56782	0.300578	1.70248
CAMKV-3	CAMKV	x	0.749206	1.02215	0.796407	0.970899	1.29154	1.07669	1.51958	0.919169	1.1404	0.713012	1.14393	1.08092	1.09184	1.18799	0.957096	0.716312	1.0198	0.83121	0.996805	1.04375	1.0824	0.836323	1.11751	1.58746	0.88993	0.955598	0.772973	1.26233	0.944656	1.20253	1.09295	0.815287	1.34118	1.27912	0.855263	1.2	0.878893	1.04906	1.0947	0.651885	1.15405	1.23373	0.487805	1.2141	1.7574
CAMKV-4	CAMKV	x	0.900641	1.27667	1.26772	1.2335	1.13542	1.16058	0.94386	1.33775	0.795427	0.993476	1.3298	0.822715	1.02977	0.714689	0.996727	0.968792	1.08656	1.12231	0.96008	1.03495	0.905844	1.02588	1.18966	1.12103	1.67792	1.92487	0.867089	0.718247	0.81777	1.04287	0.533835	0.744776	0.724191	0.974569	1.24548	0.91123	0.916201	0.875223	1.14479	0.868143	0.869077	1.06667	0.514768	1.19701	1.32949
CAMKV-5	CAMKV	x	0.914701	0.72379	1.09898	0.89942	0.981481	0.948546	0.960656	0.783451	0.710997	1.09859	0.962677	0.916431	1.07561	1.38129	0.892788	1.04406	1.04175	0.973306	0.561201	0.73176	1.07563	1.16212	0.837479	0.961938	0.927731	1.0719	1.45988	0.774876	1.01055	0.98184	0.676171	1.46136	0.727612	1.25215	0.930199	1.01378	0.867713	0.874142	1.44307	1.29148	1.63287	0.825228	1.76981	1.69124	0.949848
CAMKV-6	CAMKV	x	0.897674	1.66667	1.26339	0.830769	0.905941	1.09626	1.64651	0.816594	0.866667	1.21698	0.84858	0.913495	0.99505	1.67337	1.22059	1.19431	1.16337	0.723404	0.937824	0.977477	1.12222	1.1617	0.777385	1.03089	2.25281	0.495708	0.594675	0.903509	0.814815	0.83642	1.41791	0.669604	2.63699	1.19048	0.948148	0.746398	1.02604	0.726316	0.525253	0.60515	0.778393	0.770677	0.596567	0.581717	0.819549
CAMKV-7	CAMKV	x	1.0801	1.24217	0.763158	1.09547	1.11479	0.905263	1.64579	1.0347	0.859322	0.812265	0.801235	0.843621	0.903766	0.774194	0.745734	1.07634	1.23958	0.971175	0.823529	0.795349	1.12	1.25042	1.14032	1.03754	1.16978	1.36782	1.39833	0.876647	0.875989	0.771429	0.893204	0.908142	0.736419	0.93185	0.679359	1.05087	1.06468	0.7473	0.817427	1.00177	0.977199	1.23491	1.03014	0.493485	2.46819
CAMKV-8	CAMKV	x	1.1733	1.06106	1.08037	0.950284	1.06276	0.933246	0.922934	1.08722	0.802416	0.867845	0.917883	0.741855	0.785203	1.15666	1.3169	0.92402	1.30051	1.12883	0.793911	0.887324	0.959391	1.01411	0.990798	0.965732	0.879276	1.15089	1.01813	1.10293	0.920763	0.949329	0.584137	0.742857	1.2509	0.909171	1.16034	0.97646	0.824798	1.02703	0.921472	1.79675	1.04699	0.911841	1.70732	1.17575	0.978392
CAMKV-9	CAMKV	x	0.829096	0.870748	1.23824	0.945946	0.995536	1.04387	0.711292	0.749064	0.965479	0.931624	0.82025	0.934968	0.790365	0.90379	1.1557	0.719008	0.773973	0.848175	0.545307	0.676717	0.781847	0.759538	0.745645	0.787589	0.635468	1.0382	0.973481	0.975359	1.06968	0.789901	0.543887	1.60057	0.579407	0.67079	0.845261	0.691604	0.886792	0.795031	0.667224	1.09759	0.805263	0.970554	1.06429	1.17895	1.23204
CASK-1	CASK	x	1.46736	0.812652	1.18465	0.936475	0.92809	0.942913	0.566372	0.874327	1.21849	0.90776	1.1036	0.885271	1.30317	1.2996	1.02806	0.795567	1.03373	0.869565	0.862786	0.903846	0.97995	0.859425	0.838983	1.09843	1.40241	0.626118	0.493421	1.14891	0.788462	1.42234	1.55808	1.46335	0.55643	0.837975	0.962742	0.928144	1.19783	0.875325	0.90411	1.01081	0.586268	0.797364	1.24144	0.577465	0.914333
CASK-10	CASK	x	0.781893	0.851546	1.16267	1.05785	0.959432	1.22762	0.654639	0.950331	1.07277	0.95584	1.10909	1.40672	0.913444	1.06551	1.23214	0.8	1.19403	0.86087	1.01835	1.2028	1.36612	1.02957	1.08147	1.22246	1.10324	1.18099	1.12548	0.804054	1.34688	1.16801	0.56338	0.757384	0.957447	1.17442	0.657439	0.931438	0.874384	0.847775	1.45192	0.898659	0.548282	0.952183	1.05365	0.909984	0.617464
CASK-2	CASK	x	1.83505	1.10204	0.916667	1.15819	1.34649	0.797571	1.16511	0.866894	1.71536	1.16176	1.39496	1.26705	0.853659	1.24153	0.959707	1.29897	1.06635	0.969298	1.27397	1.04405	1.31818	1.13308	1.35968	1.22353	1.53073	1.62544	1.54496	1.0226	0.872283	1.28455	0.952	1.22747	1.14545	1.10169	1.08578	1.27329	1.88827	1.22566	1.305	0.537092	1.04583	1.44138	0.646884	0.966667	1.82069
CASK-3	CASK	x	1.24879	0.830588	1.15816	0.812357	1.17989	0.931122	1.0483	0.927966	0.602996	1.30744	1.12399	1.00338	1.0595	1.45783	0.96368	1.32368	1.15306	0.912821	1.01765	0.932551	1.17697	1.12918	0.870763	1.07561	1.0835	0.874142	1.1	0.878955	0.949285	0.783784	0.544469	0.773956	0.831063	1.12127	1.39326	1.05075	1.09329	1.20225	1.33234	0.898367	0.690189	0.831947	2.0363	1.00172	0.778702
CASK-4	CASK	x	1.18285	0.855204	1.3125	0.932515	1.0713	1.00797	0.889851	0.944371	0.894057	1.07234	1.19027	1.10432	0.922078	1.01504	1.03934	0.9776	1.00313	1.36945	0.811567	0.913333	1.14371	1.19103	0.997167	0.9362	1.5813	1.49719	1.19595	1.11637	1.22364	1.03796	0.840336	0.573643	1.28457	1.02823	0.951872	1.24505	1.12406	1.07554	0.939114	0.708226	0.871698	1.56795	0.485861	0.942138	1.93718
CASK-5	CASK	x	1.04317	1.34247	1.03479	1.0059	1.03694	1.1735	1.36152	1.60039	1.35773	1.14296	1.29712	1.18091	1.03101	1.29683	0.903643	1.13018	1.34345	1.25303	1.14689	1.88687	1.75621	1.52436	1.29676	1.23434	2.09711	1.7433	2.00466	0.953992	1.14823	1.14067	1.68788	1.55462	1.67286	1.23391	1.37591	1.25778	1.30056	1.4559	1.44361	1.02613	1.23027	1.35822	1.11256	1.22377	1.5338
CASK-6	CASK	x	1.2943	1.71851	1.10771	1.1092	1.22843	1.2144	1.50431	1.21026	0.920804	1.28497	1.22687	1.04003	1.03902	1.51076	1.0073	1.30912	1.01803	1.08886	1.29182	1.51307	1.3569	1.05343	1.26434	1.11027	0.886644	1.4385	1.12529	0.913938	1.45909	1.07553	1.55199	1.32358	0.677019	1.32139	1.16593	1.0742	1.67556	1.42045	1.17083	0.933742	0.750265	1.49402	0.57546	1.08571	2.70694
CASK-7	CASK	x	1.36893	1.38813	0.857708	0.891892	0.920833	0.948052	1.13445	1.69672	1.1913	1.02218	1.1119	1.46996	1.11864	1.1768	1.06726	0.923695	1.28395	1.08421	1.18932	1.59716	1.40455	1.21293	1.05556	0.855513	2.15638	0.488673	1.57741	1.50649	0.703504	1.1129	1.26275	1.96196	1.79358	0.720554	1.91441	0.701058	1.26818	1.3122	1.27551	1.39931	1.06601	1.48188	1.57639	1.27063	0.934783
CASK-8	CASK	x	1.22206	1.10864	0.991859	1.03935	1.04669	1.10979	0.865503	0.870428	0.900655	1.08348	1.28908	1.27614	0.898098	1.23304	0.763593	1.11881	1.10399	1.26822	1.36661	1.22526	1.06912	1.02735	1.48877	1.19949	0.655485	1.27176	1.29289	0.975665	0.997398	1.17257	1.16525	0.837803	2.08418	1.19338	0.918765	0.927495	1.26158	1.07515	1.4809	1.2321	1.16611	0.935214	1.46189	1.2553	0.987461
CASK-9	CASK	x	0.945652	0.962656	1.15165	1.08086	0.942428	0.95138	0.630314	1.01055	0.961203	1.02101	1.24309	1.08813	1.14595	0.64	0.847539	1.05833	1.06595	1.01271	1.39414	1.0322	0.993438	1.15537	1.17622	1.2361	1.26859	1.73775	1.06196	1.0007	1.08605	1.20671	1.15394	1.19241	1.19856	0.902965	1.10202	1.09615	1.01811	1.36006	1.24279	1.01815	0.799277	0.928641	1.13105	0.803797	0.790811
CDC42BPA-1	CDC42BPA	x	0.886957	0.908163	1.40488	1.02222	1.21637	0.913242	1.11765	0.735632	0.701068	1.24653	1.4059	1.23875	0.934615	0.995851	1.18077	1.13757	0.930481	0.897561	0.78744	0.847458	0.900474	0.958491	0.888889	0.798387	1.16981	0.595238	1.30745	1.40615	0.91358	0.767516	0.288288	1.17178	1.59412	0.7737	1.03913	0.845679	0.940217	1.2638	0.795181	0.840278	0.660517	0.925651	0.611111	0.457565	1.10037
CDC42BPA-10	CDC42BPA	x	2.01107	1.31955	1.5	0.85061	1.11307	1.15693	0.673469	1.05128	0.783505	1.03951	1.49067	1.24091	1.15884	1.66129	1.24382	1.26894	0.746341	0.949367	1.23288	1.20763	0.92562	0.71831	0.811989	0.877005	0.77758	0.73516	0.526667	0.876106	1.34396	1.22727	1.45263	1.72015	1.84305	0.850943	0.866928	0.958564	1.19565	0.79668	1.01626	1.30886	0.887805	0.807692	0.772152	1.06098	2.11325
CDC42BPA-11	CDC42BPA	x	0.829832	0.671772	1.08046	1.06297	0.995215	0.84292	0.639752	0.394984	0.906667	0.789621	0.800898	1.06171	1.15179	0.654762	1.05122	0.802575	0.514039	0.772009	1.07438	0.616438	0.700767	0.962477	0.779886	0.50457	0.987179	0.810056	0.855482	0.942478	0.944444	0.973298	1.15982	1.07992	0.722814	0.870494	0.993884	1.30206	0.880829	0.99729	1.16578	0.521407	0.566722	0.44086	0.423547	0.54201	0.225806
CDC42BPA-12	CDC42BPA	x	0.853107	0.874194	0.565217	1.25472	0.933908	0.780928	0.861496	0.917476	0.653367	0.727119	0.704508	0.780366	1.01015	0.93674	0.82265	0.822485	0.802817	0.507123	0.969178	1.13028	0.627848	0.785877	0.769231	0.797414	0.425397	1.05609	0.738878	1.04255	0.792899	1.03559	0.582057	0.824176	0.685237	1.06998	1	0.971209	0.833887	0.95	0.824324	0.801603	0.777778	1.03846	0.833667	0.744444	0.576923
CDC42BPA-2	CDC42BPA	x	1.22004	1.25725	1.07076	0.861607	0.989817	0.993119	0.657188	1.26288	0.584058	1.15373	0.978964	1.26353	1.32231	0.691244	0.866935	1.24	0.877005	0.91954	1.10395	1.31034	1.0587	0.928972	0.956731	0.968641	0.792402	1.28505	0.922799	0.977358	0.794755	0.891435	0.877737	0.549091	1.09298	1.14876	0.841176	1.17476	1.16505	1.21716	1.19876	0.637907	0.696023	0.66373	0.698727	0.919034	1.46843
CDC42BPA-3	CDC42BPA	x	0.823529	1.92414	0.746193	1.19872	1.08264	0.958084	1.32524	1.2402	0.633508	1.2402	0.865942	1.90286	0.829268	1.33702	1.14815	1.50318	0.7625	1.13913	1.52	1.03727	1.17365	1.68394	0.689815	1.19072	0.455516	0.383085	2.21368	1.54425	0.950382	0.8625	1.19149	1.04348	0.651685	1.32292	0.696486	1.4012	0.960317	1.15556	1.0458	1.21387	0.830275	0.902174	1.9422	0.724771	1.92391
CDC42BPA-4	CDC42BPA	x	1.37662	0.705455	1.04418	0.845697	0.820253	1.28986	0.703463	1.31437	0.585132	1.12174	0.933333	1.39234	1.79585	0.906736	1.08592	0.835821	1.17208	1.07326	1.04977	0.901163	1.18027	0.920879	1.07494	1.29539	1.21164	0.800464	2.18011	1.04365	1.05379	1.21611	1.38075	1.05137	0.906574	0.857895	1.22304	1.58713	0.902597	0.950382	1.70536	0.882353	0.768025	1.37435	0.847594	0.520376	1.48953
CDC42BPA-5	CDC42BPA	x	0.927059	0.810667	0.673563	0.830769	0.901914	1.1676	0.630037	0.88862	0.705882	0.871456	1.15548	0.83821	1.39434	0.884937	1	0.803618	0.982353	0.757732	0.779793	0.997207	0.929348	0.886194	0.929062	0.826	0.523745	1.0172	0.967241	1.09662	0.848967	1.03262	0.504292	0.718535	0.5625	0.829268	1.09466	0.682014	0.908824	0.760526	1.0411	0.776031	0.651376	1.28521	0.699411	0.891743	1.10387
CDC42BPA-6	CDC42BPA	x	0.820823	1.30155	1.11848	1.08554	0.996383	0.962963	0.676136	1.28343	0.802303	0.825654	0.997389	1.02659	1.31532	1.31273	1.02534	1.03601	0.810427	0.640097	1.35593	1.01646	0.980469	0.973333	0.81844	1.01695	0.919431	0.765891	0.855118	1.04484	1.13468	0.653846	0.909091	1.51429	1.34925	0.908881	1.05263	1.03639	0.997183	0.945055	0.997151	1.10036	1.09233	1.00949	1.2573	0.919861	0.87666
CDC42BPA-7	CDC42BPA	x	1.10265	1.33884	1.12537	0.612195	0.881356	0.837758	0.619369	0.591017	0.507431	0.951134	0.820132	0.750674	0.871854	0.867882	0.709251	1.02208	0.91573	0.903704	0.685096	0.731156	0.820856	0.825743	0.609127	0.823276	0.711434	0.933333	1.18068	0.994671	1.11025	0.912685	2.00565	0.86236	0.791569	0.793049	0.925982	1.04643	0.899351	1.03395	1.08481	0.723926	0.506787	1.04107	0.486708	0.914027	0.698152
CDC42BPA-8	CDC42BPA	x	0.701205	1.48903	1.26031	0.964187	0.896907	1	0.321818	0.328467	0.444646	1.18552	0.622189	0.801115	0.959716	1.33333	0.923611	0.88	0.840625	0.727835	0.982659	0.62908	1.11186	0.724444	0.750538	0.628743	0.52834	1.77441	0.996296	1.17263	1.21124	1.05232	2.27914	0.521964	1.21546	1.28049	0.709389	0.751381	0.68299	0.454545	0.87069	0.878193	0.738281	0.783276	0.616896	0.480469	0.885666
CDC42BPA-9	CDC42BPA	x	0.97852	1.08431	0.902736	1.00313	0.840456	1.05063	0.694949	0.596117	0.552632	0.877016	0.760905	0.814558	1.01202	1.3314	0.648148	0.671309	0.661417	0.708215	1.00676	0.675141	0.726496	0.503623	0.72479	0.756466	0.811111	1.11848	1.36574	1.26379	0.980936	1.17062	0.8	0.893035	0.421189	0.746795	1.03612	0.876667	0.99705	0.773913	0.729904	0.539301	0.945263	0.80651	1.43668	0.757895	0.74141
CDC42BPB-1	CDC42BPB	x	0.824302	0.738989	0.884914	1.17418	0.942948	0.928082	0.641638	0.661218	0.885007	0.689109	0.825749	0.669978	1.14007	0.916938	1.01266	0.850515	1.10019	0.793594	0.777555	0.892495	0.875256	1.16358	1.13869	1.06098	1.51609	1.43668	1.37973	1.12553	0.982618	1.07555	0.983051	1.36408	0.892857	0.978535	1.23938	0.825362	0.778226	1.12682	0.729847	0.735149	0.766846	1.18649	0.946782	0.919137	0.552703
CDC42BPB-10	CDC42BPB	x	1.38651	0.890282	1.09571	0.895447	1.30237	1.06798	0.90566	0.760814	0.894526	1.01192	0.804762	0.834341	1.15637	1.1775	1.33272	0.741791	0.757417	0.76461	1	1.04966	0.923077	0.905109	0.847826	0.856923	1.65042	1.60549	0.956577	0.797493	1.01001	0.954887	0.386667	1.23236	1.19225	1.16943	1.20742	1.28258	0.792079	0.693141	0.852941	1.57664	1.17391	0.955243	1.67445	1.40153	1.35806
CDC42BPB-2	CDC42BPB	x	0.948276	1.23952	1.27957	0.969543	0.939024	1.24832	1.16357	2.01471	0.745645	1.39921	1.17073	1.24275	0.967742	1.30286	1.63924	1.23	0.954545	1.27011	1.19481	1.66912	1.23485	1.18321	1.87634	1.45128	2.61017	1.09202	1.21429	0.837912	0.657807	1.32646	0.259669	1.51163	2.21769	1.21801	1.332	1.74272	1.69565	1	1.24138	0.817241	0.249071	0.943089	0.710345	0.115242	0.699187
CDC42BPB-3	CDC42BPB	x	1.29899	1.24084	1.26633	0.974648	1.07602	1.32822	0.877593	1.01933	1.10959	0.913793	0.938176	1.25279	0.849802	1.53591	1.21798	1.13569	1.02326	1.02463	0.927746	1.48889	1.23906	1.07875	0.977427	1.22074	1.25866	1.40039	0.778547	1.36332	0.931085	1.15089	1.51905	1.04703	1.52478	1.04778	1.56812	1.19826	1.03165	0.689189	0.623626	0.735812	0.653481	1.11265	0.845401	0.640823	0.843874
CDC42BPB-4	CDC42BPB	x	1.23174	1.135	0.72578	1.00472	0.966507	1.04754	1.08974	0.966414	1.18765	1.09524	0.943548	1.167	1.15639	1.10876	1.01426	0.905199	1.01647	1.07484	1.48375	1.18899	1.29247	1.34806	1.01667	1.36148	1.2184	2.18807	1.47318	1.05205	1.00173	1.03591	1.16894	1.49323	0.674483	1.40152	1.06974	1.08968	0.982922	0.915517	0.818898	1.24939	1.61272	0.974946	0.982968	1.45549	0.87146
CDC42BPB-5	CDC42BPB	x	1.60842	1.18182	2.02588	1.04977	1.17402	1.10973	1.22309	1.40671	1.23795	1.27387	1.50533	1.63191	1.37859	1.44123	1.68384	1.52055	1.40503	1.27022	1.36754	1.51412	1.13302	1.67845	1.31047	1.56906	2.09381	2.08728	1.18855	0.982311	1.30457	0.996377	1.0865	0.969819	1.95197	1.0755	0.934444	0.810304	1.57357	1.62095	1.08409	1.14914	2.17827	1.29483	1.17425	2.16469	1.4069
CDC42BPB-6	CDC42BPB	x	1.19223	0.9413	1.56543	0.963415	1.11043	1.15116	1.29159	1.24188	1.22114	1.12763	1.51069	1.49847	1.45688	1.23841	1.17078	0.944444	1.19658	1.08989	1.52542	1.24731	1.22126	1.16697	1.22619	1.01906	1.03088	0.710459	1.36661	1.01218	0.865007	1.28469	1.60479	1.46444	0.811839	1.38671	1.17027	1.49592	0.988713	1.1271	1.16279	1.91547	1.07666	1.18843	2.74003	1.39182	1.10831
CDC42BPB-7	CDC42BPB	x	1.10166	1.28184	0.890086	1.07205	1.0144	1.29455	1.13551	0.460658	0.684628	1.12824	0.883553	0.800289	1.31678	1.36123	1.70081	1.0504	0.909091	0.962598	1.07647	1.33239	1.37309	1.18378	1.10672	1.04473	1.67105	1.08858	1.75076	0.860382	0.913992	0.931818	0.510242	1.00212	0.623016	1.28081	1.27445	0.862516	1.5011	1.09739	1.03695	0.804688	1.31691	1.14011	1.11094	1.08539	1.09282
CDC42BPB-8	CDC42BPB	x	0.863095	0.68617	0.949153	1.21875	0.752427	1.06667	0.785714	1.29762	0.764151	0.759259	0.887372	1.02548	0.625	1.22751	1.4697	0.892857	0.933824	1.04294	1.09211	0.745342	1.05085	0.891791	0.59176	0.630824	0.701389	0.68125	0.677922	1.11719	0.355828	0.69869	0.532787	0.443396	0.858025	1.2126	0.943396	0.977124	0.356164	0.863248	0.745098	1.665	0.864253	0.824773	0.49	1.0724	0.888218
CDC42BPB-9	CDC42BPB	x	1.23208	1.24621	1.48419	0.994048	0.989071	0.954802	1.34426	0.931224	1.05132	1.14224	1.13006	1.10533	1.34508	1.42391	1.67202	1.5354	0.960377	1.27383	1.08151	1.22449	1.27767	1.22423	0.99359	1.49483	1.04839	1.96252	0.815068	1.18679	0.981562	1.2252	0.919386	0.546618	1.39804	1.17418	1.33577	0.944238	0.944972	1.10996	1.104	1.21622	1.55054	1.45519	1.38649	1.61431	1.4936
CDC42BPG-1	CDC42BPG	x	0.740668	0.941176	0.997812	0.793907	0.981728	1.25662	0.748872	0.76378	1.04529	0.924338	0.979248	0.877193	0.95935	1.0467	1.02622	1.12903	1.0625	1.05011	0.960663	0.911871	0.979899	1.04972	1.18758	1.05683	0.774876	1.08156	0.861945	1.13021	0.917676	1.02991	1.06619	0.579618	0.888128	0.946188	1.00452	0.905225	0.947631	1.11751	0.862534	1.20192	0.873964	1.41815	0.6875	1.40299	1.23363
CDC42BPG-10	CDC42BPG	x	2.0905	0.977901	0.621359	1.26341	0.986425	0.966019	1.25263	0.772059	2.01304	1.09206	1.14835	1.26346	1.15845	0.825581	1.61463	2.04348	1.71204	0.976415	0.84	1.4152	0.991489	0.8	1.10042	1.61479	2.02591	0.902208	0.953488	1.21802	1.04688	0.647619	0.285088	0.415525	0.657609	0.973856	1.03257	1.66524	0.989247	1.27014	0.785714	1.70526	1.07372	1.08304	1.87018	1.36859	0.66436
CDC42BPG-2	CDC42BPG	x	0.490196	0.832258	0.829932	0.985507	1.24242	0.847826	0.766816	0.461905	1.52041	0.9447	0.580292	0.835052	0.176796	0.559211	0.733333	0.911765	1.02	0.95	0.679803	0.724551	1.17857	0.834171	0.823529	0.975	0.656126	0.881148	2.23077	1.05645	1.14222	1.05694	0.735484	2.80153	2.32456	1.15254	0.609195	0.791339	0.456954	1	1.22628	0.945055	1.42056	0.790123	0.747253	1.76636	0.839506
CDC42BPG-3	CDC42BPG	x	0.741438	0.649847	0.75265	0.808418	0.967422	0.954545	0.864295	1.21657	0.794743	0.863864	1.1012	1.13147	0.603985	0.905849	0.863988	0.773498	0.803249	0.808547	1.06836	0.943262	1.04927	0.550165	0.675676	1	0.693231	0.725581	0.88244	1.34479	1.02975	0.934277	0.823024	1.25993	0.590301	1.05882	0.762313	0.797087	1.0303	0.802935	0.977459	1.03425	1.22362	1.22758	0.928767	1.09548	1.06961
CDC42BPG-4	CDC42BPG	x	0.810714	0.945455	1.67025	1.25714	1.13242	1.12658	1.41956	1.10615	1.35119	1.54179	1.27007	1.23926	0.788079	1.22553	1.32127	1.62551	1.08647	1.75676	1.52055	1.25137	1.61421	1.49007	1.42475	1.26877	1.05898	2.34579	1.4441	0.995624	0.936321	1.13971	1.8447	1.56913	0.623333	0.972222	1.4916	1.48693	1.13284	1.6278	1.4	1	0.737013	1.48418	0.614362	1.18831	1.2943
CDC42BPG-5	CDC42BPG	x	1.24088	0.722955	1.19086	1.1689	1.12254	0.850549	0.540498	0.938976	0.509182	0.941261	0.914986	0.892377	0.882042	0.651639	1.21412	0.927861	0.592672	0.400943	1.64726	1.01914	0.588	0.777403	0.793043	1.17045	0.569358	0.726073	0.494863	1.26453	1.08748	1.03762	0.963719	0.791549	1.37953	0.799479	0.91678	0.681462	0.908046	0.966258	0.582677	0.70678	0.643785	1.04339	0.99661	0.450835	0.981405
CDC42BPG-6	CDC42BPG	x	1.6789	1.25287	0.714617	1.09414	0.933962	0.853556	0.985486	1.41131	1.41653	1.06156	0.765083	0.853786	1.07377	1.27495	1.65217	1.00813	1.186	1.2752	1.2369	1.08884	0.963942	1.10618	1.22478	1.20572	1.46383	1.35144	1.12329	1.17632	1.11013	1.30556	1.1824	0.339623	0.900677	1.42564	1.18629	1.17622	1.17664	1.25272	1.09091	0.873476	1.57464	1.15175	1.12348	1.5939	1.57511
CDC42BPG-7	CDC42BPG	x	1.41923	0.840304	0.679128	1.03516	0.814516	1.03114	0.693931	0.44837	0.811005	0.954839	0.709677	0.738928	0.496732	1.09783	0.930131	0.868726	0.891228	0.651452	0.776824	0.688716	1.04865	0.848665	0.887006	0.882353	0.662222	0.472585	0.601671	1.16247	0.877514	1.26812	1.53512	1.45387	0.966258	0.985	1.0961	0.979466	1.15517	0.613043	0.905512	2.40303	0.640212	1.72986	2.84242	0.732804	0.962085
CDC42BPG-8	CDC42BPG	x	0.8739	0.664141	1.53364	0.795107	0.867209	0.740099	1.11245	0.804598	1.16588	0.743501	0.903433	1.00409	0.967089	0.58011	0.872727	0.433962	0.481675	1.0375	0.939623	0.706294	0.651917	0.65567	0.701195	1.1513	0.675633	0.783784	0.415942	0.905759	1.32353	1.01601	0.757485	1.27915	0.433702	0.901639	0.968224	0.776276	0.701695	0.463343	0.883582	1.02947	0.748235	0.926009	1.34947	1.13882	0.672646
CDC42BPG-9	CDC42BPG	x	1.24759	0.798077	0.740385	0.869427	0.845528	0.844937	0.728137	0.867403	0.881356	0.922631	0.917279	0.938343	0.479358	0.429975	0.620482	0.835135	0.785915	0.692521	0.551155	0.654088	0.563492	0.781903	0.745575	0.531313	0.590998	1.43672	0.490706	0.81717	1.06374	0.998469	0.761039	0.992386	1.16223	0.593698	0.72814	0.975564	0.804878	0.853333	0.589286	0.946117	0.699411	1.05317	1.12044	1.27505	1.01022
CDC7-1	CDC7	x	0.102689	0.210106	0.236318	0.339286	0.330729	0.288732	0.142549	0.11674	0.067623	0.285458	0.366509	0.230032	0.210046	0.386517	0.2	0.0994475	0.176966	0.122667	0.236842	0.151429	0.138047	0.14611	0.31134	0.300797	0.0175439	0.193478	0.133166	0.554517	0.400844	0.447665	0.0612245	0.149746	0.221333	0.279152	0.169492	0.189084	0.0859375	0.101064	0.176829	0.0553506	0.217712	0.117188	0.173432	0.136531	0.185547
CDC7-10	CDC7	x	0.516279	0.424723	0.782609	0.799611	0.874204	0.703518	0.247694	0.480164	0.281955	0.441411	0.423542	0.40678	0.373547	0.451011	0.535256	0.22913	0.50647	0.328455	0.391566	0.348	0.380497	0.567949	0.4425	0.526178	0.550471	0.167203	0.390104	0.549626	0.752113	0.696	0.37481	1.12302	0.211129	0.583432	0.435294	0.405508	0.42623	0.263359	0.292308	0.475389	0.341789	0.416	0.332902	0.246996	0.448
CDC7-2	CDC7	x	0.293333	0.310056	0.479893	0.518634	0.480363	0.577049	0.421144	0.560086	0.497573	0.475	0.491935	0.440313	0.421053	0.352201	0.301546	0.413408	0.484642	0.329231	0.264881	0.354633	0.198171	0.195929	0.485488	0.343066	0.386719	0.206767	0.282297	0.483816	0.664975	0.449918	0.233129	0.274691	0.174009	0.524027	0.688525	0.519763	0.321678	0.297994	0.155367	0.201814	0.146751	0.118687	0.385488	0.148847	0.174242
CDC7-3	CDC7	x	0.167015	0.347458	0.142857	0.520599	0.480697	0.412896	0.188583	0.0865645	0.123195	0.175621	0.133748	0.179894	0.234568	0.390625	0.334107	0.132561	0.0792752	0.142857	0.189152	0.208062	0.180055	0.779338	0.227083	0.342803	0.166667	0.12468	0.12541	0.578577	0.358839	0.337977	0.0753354	0.0828729	0.050995	0.244393	0.202485	0.296479	0.123515	0.10992	0.16095	0.161209	0.168385	0.192568	0.122586	0.257732	0.169764
CDC7-4	CDC7	x	0.058011	0.324503	0.171216	0.334152	0.35989	0.335802	0.19434	0.177778	0.430524	0.220568	0.254516	0.21519	0.264026	0.255102	0.0987952	0.154891	0.145604	0.0880829	0.36	0.133159	0.277778	0.230483	0.300952	0.218	0.251429	0.0286396	0.256447	0.492913	0.596677	0.679276	0.0491329	0.215328	0.079646	0.220679	0.320405	0.222566	0.279778	0.208333	0.186186	0.0740741	0.131086	0.232323	0.122685	0.102996	0.165657
CDC7-5	CDC7	x	0.371025	0.468254	1.18937	0.666667	0.430556	0.727915	0.948617	0.285319	0.274648	0.584383	0.555556	0.69382	0.233449	0.367688	0.24026	0.655022	0.275556	0.3	0.242009	0.325581	0.52451	0.408696	0.320917	0.269231	0.221264	0.662526	0.2411	0.436975	0.391304	0.9675	0.783186	0.604396	0.205387	0.633508	0.534483	0.633484	0.343915	0.310185	0.177885	0.265176	0.663609	0.515789	0.226837	0.899083	0.154386
CDC7-6	CDC7	x	0.460317	0.371188	0.69183	0.617956	0.665966	0.649443	0.505229	0.667946	0.446103	0.461193	0.544649	0.335199	0.54677	0.697531	0.489992	0.440835	0.510204	0.387972	0.408163	0.255838	0.460976	0.41387	0.485149	0.499215	0.376128	0.525641	0.275229	0.673274	0.504242	0.570761	0.331162	0.525441	0.303158	0.658626	0.608724	0.603381	0.383961	0.382895	0.385	0.352389	0.442114	0.325511	0.40529	0.625	0.363361
CDC7-7	CDC7	x	0.569665	0.333856	0.7872	0.842857	0.750427	0.791536	0.657005	0.270572	0.362434	0.406991	0.436533	0.312977	0.732899	0.449102	0.732224	0.447154	0.233449	0.474359	0.284585	0.320583	0.266667	0.764951	0.705722	0.498069	0.679558	0.426698	0.488673	0.665529	0.530043	0.603846	0.450382	0.29697	0.465704	0.650057	0.586071	0.671838	0.510638	0.373102	0.321577	0.24763	0.464865	0.268743	0.398104	0.336486	0.28143
CDC7-8	CDC7	x	0.258794	0.363171	0.214646	0.486034	0.430412	0.356021	0.306954	0.374408	0.170843	0.394892	0.429043	0.290566	0.231429	0.330247	0.177874	0.270769	0.298851	0.244505	0.214545	0.17608	0.192661	0.267303	0.341743	0.310023	0.314848	0.238512	0.337104	0.541039	0.425868	0.502521	0.409938	0.495025	0.658163	0.420896	0.564007	0.507563	0.143312	0.323529	0.245791	0.103371	0.283516	0.328918	0.134831	0.127473	0.222958
CDC7-9	CDC7	x	0.211909	0.426804	0.399072	0.456647	0.488172	0.658879	0.415712	0.344477	0.472222	0.253056	0.375839	0.291892	0.43301	0.4122	0.433414	0.387471	0.470711	0.592417	0.286486	0.144254	0.236196	0.541237	0.224599	0.26087	0.329193	0.198667	0.147143	0.49005	0.386861	0.350854	0.314741	0.257669	0.503817	0.576577	0.367372	0.447094	0.346154	0.251613	0.281095	0.265077	0.244019	0.337017	0.336606	0.245614	0.213628
CDK1-1	CDK1	x	0.453901	0.558011	0.712575	0.683544	0.590909	0.636364	0.451613	0.331461	0.319444	0.41453	0.311765	0.48249	0.32948	0.236364	0.174603	0.638037	0.710145	0.57554	0.442177	0.47973	0.414815	0.41954	0.346491	0.525581	0.249071	0.456621	0.356688	0.672355	0.442509	0.981752	0.513333	0.429487	0.0974359	0.590698	0.593074	1.2605	0.234694	0.174825	0.21831	0.486486	0.196429	0.278049	0.657658	0.330357	0.546341
CDK1-10	CDK1	x	0.719328	0.626198	0.559677	1.10697	1.17143	0.97615	1.12617	0.692137	1.10393	0.86105	0.980603	0.927711	1.01875	1.36518	1.17647	0.95581	0.612557	0.579288	1.31272	1.10204	1.25246	1.00253	1.29908	1.3275	0.589365	0.545685	0.594714	1.39583	1.03842	1.22292	0.513417	0.403736	0.431856	1.00703	0.844864	0.862338	0.639279	0.535714	0.572289	0.931845	0.795658	0.897285	0.722679	0.636015	0.626919
CDK1-11	CDK1	x	0.448829	0.406744	0.361461	0.80235	0.74612	0.860335	0.651715	0.537736	0.477374	0.448126	0.38204	0.298909	0.744533	1.02121	0.761649	0.435868	0.408088	0.5131	0.647349	0.789402	0.595106	0.661858	0.680717	0.724168	0.323529	0.271548	0.302674	0.828767	0.888811	0.868421	0.123769	0.330843	0.201713	0.409571	0.420026	0.409306	0.254194	0.215865	0.179144	0.655399	0.553415	0.982867	0.777465	0.463222	0.938683
CDK1-12	CDK1	x	0.488645	0.584579	0.714405	0.910982	1.19475	0.929522	0.568401	0.50117	0.660041	0.539171	0.606813	0.55679	0.714946	0.732143	0.649095	0.70626	0.764807	0.629213	0.654122	0.653949	0.691369	1.04393	0.983411	1.08947	0.242792	0.26224	0.274952	1.03902	0.925837	1.16452	0.391339	0.316054	0.378422	0.547904	0.637466	0.646111	0.296404	0.260456	0.255597	1.27374	0.668758	0.767023	1.04505	0.577164	0.757456
CDK1-13	CDK1	x	0.842391	0.216814	0.549133	0.68254	0.461722	0.498783	0.447826	0.559649	0.568085	0.579336	0.471088	0.404223	0.555785	0.532957	0.770883	0.518337	0.481481	0.340909	0.636816	0.600962	0.512	0.616387	0.506993	0.71236	1.01048	0.289362	0.783242	0.551402	0.564138	0.908517	1.09375	0.892583	0.766938	0.319708	0.272864	0.570539	0.440994	0.538721	0.48368	0.781481	0.563452	0.558304	0.874074	0.218274	0.531802
CDK1-14	CDK1	x	0.164666	0.407285	0.164745	0.453752	0.492777	0.429587	0.298817	0.279279	0.208571	0.217341	0.144647	0.26245	0.449206	0.352685	0.21727	0.0582011	0.0755064	0.138196	0.181513	0.223301	0.210526	0.290754	0.341823	0.253213	0.178862	0.139891	0.0666667	0.68981	0.679875	0.636643	0.174157	0.1198	0.273535	0.376227	0.435196	0.412107	0.135593	0.084	0.153226	0.436391	0.150794	0.274895	0.357988	0.0820106	0.360449
CDK1-15	CDK1	x	0.590164	0.234783	0.758929	1.05164	1.00565	0.75463	0.386179	0.502092	0.172222	0.639485	0.498246	0.781818	0.753623	0.797794	0.882784	0.246154	0.620155	0.286458	0.870588	0.715	1.14815	1.09865	0.87451	0.850174	0.0580645	0.382759	0.0857143	1.15563	1.01156	0.703804	0.263959	0.38674	1.24757	0.663934	0.421203	0.677903	0.195767	0.269231	0.129187	0.270833	0.69395	0.862191	0.295139	0.629893	0.600707
CDK1-16	CDK1	x	0.355748	0.25974	0.432071	0.484733	0.580139	0.570485	0.342623	0.298182	0.324468	0.443357	0.352436	0.438356	0.792952	0.538033	0.51259	0.261745	0.312039	0.173184	0.582927	0.359375	0.467775	0.334454	0.439189	0.662273	0.36289	0.452381	0.5344	0.863636	0.63306	0.672507	0.236715	0.1566	0.551075	0.518038	0.461883	0.500773	0.284974	0.280519	0.425061	0.257596	0.363766	0.424915	0.256275	0.616262	0.575085
CDK1-2	CDK1	x	0.388889	0.179331	0.544262	0.542522	0.806818	0.598291	0.283439	0.291022	0.184579	0.420168	0.540724	0.410681	0.483376	0.47929	0.362117	0.414545	0.267717	0.215686	0.432927	0.375439	0.392265	0.630072	0.412664	0.60221	0.334802	0.346049	0.111712	0.628635	0.426374	0.617068	0.176678	0.0315789	0.0830325	0.442913	0.324125	0.591241	0.224409	0.313208	0.16092	0.117371	0.170115	0.327913	0.0539906	0.31954	0.531165
CDK1-3	CDK1	x	0.329787	0.24911	0.130293	0.465753	0.570922	0.486891	0.232143	0.257069	0.311512	0.556818	0.475	0.337104	0.287582	0.303116	0.60262	0.362069	0.215768	0.756881	0.51505	0.485849	0.33195	0.251989	0.349614	0.394737	0.342784	0.360465	0.193258	0.322165	0.595339	0.353403	1.06667	0.450549	0.238579	0.17094	0.32767	0.257353	0.434211	0.257919	0.285047	0.126866	0.140884	0.233516	0.196517	0.453039	0.126374
CDK1-4	CDK1	x	0.172414	0.175439	0.32809	0.209256	0.255624	0.234568	0.133971	0.203971	0.10683	0.189103	0.28356	0.22807	0.137931	0.216117	0.338496	0.146341	0.323276	0.217923	0.241287	0.18932	0.162933	0.292894	0.160279	0.237374	0.102819	0.383855	0.0861538	0.375	0.332893	0.326504	0.107317	0.0782443	0.138783	0.0967742	0.190865	0.198773	0.126904	0.0820896	0.194861	0.0477612	0.142857	0.130877	0.0835821	0.168067	0.102922
CDK1-5	CDK1	x	0.646825	0.257353	0.101974	0.431884	0.677507	0.480597	0.623762	0.720497	0.360434	0.548571	0.28125	0.351415	0.467005	0.697941	0.823333	0.432331	0.274262	0.245342	0.459283	0.383607	0.355872	0.5	0.348454	0.479487	0.0472103	0.233261	0.202105	0.58945	0.320236	0.492901	0.167183	0.0136054	0.240602	0.700234	0.210832	0.559459	0.0762332	0.32636	0.467249	0.429929	0.597122	0.35514	0.750594	0.369305	0.495327
CDK1-6	CDK1	x	0.18109	0.519196	0.190635	0.530017	0.627946	0.604693	0.187421	0.163295	0.111809	0.135329	0.218182	0.290954	0.483271	0.488136	0.489324	0.110902	0.156566	0.12543	0.209814	0.209073	0.111702	0.578295	0.455393	0.345304	0.0356164	0.0451128	0.215241	0.572939	0.537994	0.48531	0.374088	0.150362	0.174342	0.265686	0.281385	0.351266	0.0271967	0.082495	0.091954	0.367911	0.463785	0.316106	0.362379	0.299065	0.252404
CDK1-7	CDK1	x	0.445087	0.365662	0.411839	1.07431	0.884527	0.89821	0.648756	0.480276	0.70987	0.70367	0.578446	0.616139	1.20113	1.00698	1.00509	0.414286	0.494024	0.408392	0.735936	0.81573	0.752566	0.881061	0.974717	0.74554	0.34252	0.230689	0.254488	1.03308	0.935636	1.20881	0.325747	0.228095	0.448529	0.842189	0.768707	0.687755	0.349085	0.457187	0.440422	0.686433	1.42422	0.962572	0.589398	3.03229	0.978887
CDK1-8	CDK1	x	0.24357	0.0898551	0.244409	0.31028	0.190556	0.239414	0.0937951	0.196862	0.227684	0.247694	0.0953488	0.131301	0.0701513	0.128713	0.113976	0.132486	0.128155	0.0905588	0.148289	0.14741	0.221034	0.205369	0.217044	0.1363	0.331115	0.11437	0.161647	0.359526	0.271296	0.305499	0.0950495	0.0990476	0.0824561	0.158103	0.144661	0.149144	0.147114	0.117647	0.133333	0.0996441	0.139073	0.0539568	0.0996441	0.112583	0.0347722
CDK1-9	CDK1	x	0.0234742	0.038835	0	0.156716	0.234568	0.203187	0.0245399	0	0.00666667	0.072973	0.0224359	0.106173	0.0988593	0.0395257	0.0588235	0.012931	0.092233	0.021978	0.00970874	0.0283019	0.0544554	0.0516717	0.132576	0.281977	0.0382514	0.0385542	0	0.0786885	0.139211	0.0594315	0.18593	0	0.023622	0.0707692	0.0718391	0.0502283	0	0.071066	0	0.00320513	0.0322581	0	0	0	0
CDK10-1	CDK10	x	0.4	1.16883	0.462264	0.944785	1.06707	0.994624	0.435556	0.566667	0.398577	0.779279	0.64455	0.93254	0.479592	1.05405	1.64407	0.601064	0.714286	1.00526	0.685535	1.24667	0.524272	0.684932	0.996016	1.07834	0.353147	0.353448	0.277174	0.751634	1.59921	0.826211	0.269939	0.380645	0.16	0.818182	1.23645	0.859375	1.23448	0.823171	0.722222	0.690037	0.508961	0.770428	0.188192	0.580645	0.937743
CDK10-10	CDK10	x	0.995595	1.507	1.80375	1.14992	1.05573	1.23967	1.71825	1.22737	1.54754	1.40899	1.05506	1.28128	1.30015	1.2	1.92665	1.31688	1.18437	1.2416	1.71956	1.34897	1.44025	1.11493	0.996364	1.35615	2.0803	1.65139	1.61097	1.01078	1.27794	0.942831	1.14583	0.942939	1.26109	1.27697	1.43093	1.14511	1.61974	1.66149	1.23154	1.38194	0.797165	1.38735	1.26852	0.821156	1.65372
CDK10-11	CDK10	x	0.547826	0.795669	0.51359	0.807429	0.669291	0.799634	0.508322	0.427344	0.411043	0.703219	0.743931	0.654566	0.95539	0.713926	1.08674	0.639194	0.751016	0.690608	0.6878	0.841525	0.685985	0.631467	0.600843	0.789394	0.579418	0.60852	0.493142	1.02344	1.04216	0.987131	0.404973	0.327808	0.38087	0.701954	0.78968	0.782528	0.739979	0.831155	0.813725	0.741041	0.795765	0.760985	0.527383	0.719945	0.426099
CDK10-12	CDK10	x	0.507014	0.812048	0.904167	0.84375	0.921642	1.03158	0.787009	0.58794	0.837429	0.816078	0.502959	0.92341	0.998205	1.10019	1.13699	0.693446	0.665854	0.575621	0.918455	0.9375	0.969636	0.739336	0.915641	1.06856	0.932271	0.57479	0.998561	0.8053	1.12723	1.30278	0.723247	0.745763	0.357143	0.969453	0.897328	0.853125	0.807601	0.902128	0.668919	0.989899	0.77886	1.41409	1.11977	0.648122	0.945017
CDK10-13	CDK10	x	0.613861	0.564885	0.712366	0.881068	0.774611	0.873853	0.402597	0.312614	0.525292	0.710031	0.646281	0.583333	1.07944	0.891089	0.853403	0.627604	0.422872	0.383495	0.80531	0.7723	0.8675	0.696078	0.727811	0.82774	0.777963	0.491438	0.635078	1.08717	0.817308	0.807463	0.629187	0.737443	0.717718	1.03668	0.772222	0.870915	1.00937	0.738764	0.865633	0.785156	0.691684	0.73431	0.486328	0.486815	0.48954
CDK10-14	CDK10	x	1.04667	1.18478	1.63576	1.75833	0.94086	1	1.73953	1.73158	1.73611	0.735369	1.07117	1.18619	0.892473	1.36612	1.34146	1.07229	1.21084	1.0125	1.73643	1.46154	1.17791	1.32323	1.41089	1.43363	0.967164	1.74249	0.707895	1.06774	0.742947	0.906883	0.113095	0.633663	1.55745	1.18382	1.04777	0.813953	1.1625	0.993548	1.68056	1.49751	1.51485	0.630597	0.845771	1.73267	1.51866
CDK10-15	CDK10	x	0.234188	0.482328	0.433526	0.739326	0.723447	0.663774	0.290274	0.295946	0.317549	0.731343	0.519894	0.552564	0.547022	0.862403	0.717195	0.615044	0.522305	0.284722	0.639344	0.62635	0.409867	0.609618	0.567823	0.557927	0.524671	0.466767	0.289665	0.611111	1.02629	0.795676	0.180579	0.471888	0.479757	0.784011	0.462069	0.880546	0.619718	0.643341	0.718346	0.469761	0.587977	0.487069	0.533052	0.441349	0.400862
CDK10-2	CDK10	x	0.963303	0.745536	1.13433	1.10504	0.940426	1.23611	1.21212	0.923767	1.32895	1.17879	1.01269	1.06762	0.995951	1.20243	1.14754	1.37989	0.916667	0.621145	0.858696	0.754717	0.987552	1.1444	0.976271	0.753425	0.83913	1.728	1.05442	0.996894	0.788618	0.851541	0.572289	0.605128	0.75	1.01504	1.19031	1.3179	1.03941	1.42105	1.0113	0.637363	0.95114	0.927536	0.197802	0.700326	0.481884
CDK10-3	CDK10	x	0.691176	0.756667	0.701408	0.928339	1.10131	1.25667	0.557143	0.682065	0.481894	0.928705	0.749469	0.692	1.14198	1.25763	0.97619	0.70684	0.775281	1.06579	0.742775	0.946619	1.06774	0.807522	0.890476	0.88764	0.66302	0.84901	0.653846	0.937956	0.731261	0.926733	0.950382	0.486989	0.585561	1.16986	0.907445	0.719266	1.12273	1.08897	0.840467	0.412736	0.735219	1.14359	0.28066	0.552699	0.587179
CDK10-4	CDK10	x	0.817352	1.05159	0.925926	1.3018	1.01277	0.922131	1.46057	0.636111	1.34909	1.66225	1.39769	1.34368	0.897516	1.39827	1.80488	1.31696	0.982143	0.825532	1.91848	1.29075	1.26882	1.12459	1.34167	1.55303	1.30548	2.10543	2.50809	0.934509	0.918072	1.10956	0.900452	0.971246	1.98844	1.51466	0.869565	1.40122	1.68023	1.4466	1.17453	1.14187	1.2509	1.25697	1.52595	1.43369	1.80495
CDK10-5	CDK10	x	0.705556	0.769526	0.719212	0.849057	0.982074	0.934694	0.544498	0.411361	0.479253	0.671488	0.833739	0.765009	1.16758	0.781283	1.13352	0.528607	0.722296	0.537634	0.847432	0.926094	1.03612	0.892508	0.858156	1.13667	0.379947	0.497788	0.689362	0.953313	0.701649	0.925466	0.563636	0.319797	0.657593	0.860911	0.823204	0.82327	0.823088	1.16611	0.93343	0.967956	0.98954	0.872913	0.911602	0.982218	0.913729
CDK10-6	CDK10	x	0.3	1.1875	0.25	0.418919	1	0.6875	0.542857	0.423077	0.59375	0.362069	1.51613	0.543478	1.11429	0.53125	0.693878	0.0833333	0.454545	1.125	0.415094	0.641026	1.72414	1.22917	0.793651	0.875	1.38235	0.484848	1.40816	1.26471	2.85185	0.72	0.0571429	10	0.238095	1.6	0.168142	1.78571	1.21429	0	1.36842	0.935484	1.95455	0.578947	0.612903	2.56818	0.131579
CDK10-7	CDK10	x	0.630662	0.953947	0.770677	1.05364	1.07595	0.870036	1.01983	0.771971	0.417827	0.718663	1.09254	1.02266	0.936111	1	1.16602	0.592593	0.660448	0.380952	0.967742	0.785992	0.717143	1.08021	0.737838	1.24806	1.1027	0.946043	0.670769	0.934978	0.737052	1.10843	0.568493	0.623626	0.439216	0.899533	0.609555	1.0118	0.611538	0.807407	1.20233	0.826446	1.15366	1.09227	0.559229	1.01182	0.910224
CDK10-8	CDK10	x	0.408526	0.528814	0.643927	1	0.809028	0.854512	0.511199	0.366325	0.516729	0.643757	0.647792	0.647674	0.819876	0.766773	1.02291	0.446809	0.631676	0.375502	0.913043	0.571429	0.667266	0.72751	0.792319	0.697135	0.820876	0.432821	0.421851	0.795527	1.05419	0.915541	0.5209	0.289157	0.261329	1.01437	0.927374	0.683287	0.792181	0.761811	0.717993	0.784314	0.513839	0.596	0.801307	0.477738	0.312
CDK10-9	CDK10	x	0.408108	0.896907	0.752841	0.95493	0.776995	0.848397	0.572727	0.501085	0.592075	0.902033	0.563665	0.540098	0.893271	1.25141	0.646316	0.688022	0.945876	0.787724	0.910112	0.984026	1.1735	0.75817	0.751092	0.800905	0.530075	1.16341	0.808765	1.26094	1.16529	1.02824	0.26096	0.501449	0.480418	0.847909	1.05954	0.918406	0.727545	1.4697	1.08876	0.595483	0.771429	0.709434	0.556468	0.571429	0.796226
CDK11B-1	CDK11B	x	0.497338	0.65736	0.673831	0.982619	1.00481	1.15637	0.504158	0.560591	0.375486	0.655456	0.84466	0.666422	1.03386	1.00886	0.950495	0.793146	0.570431	0.498008	0.759756	0.622437	0.779355	0.893738	0.892308	0.930208	0.450761	0.618802	0.663793	0.987796	0.84323	0.977047	0.449735	0.88227	0.29156	0.856918	1.09834	1.07464	0.575037	0.518685	0.451327	0.985862	0.811723	0.707854	0.772856	0.722025	0.756705
CDK11B-10	CDK11B	x	0.155388	0.28046	0.418552	0.904891	0.834532	0.768868	0.160862	0.135783	0.248756	0.403361	0.450502	0.410853	0.510689	0.913514	0.412417	0.174941	0.339523	0.31405	0.389474	0.572603	0.667665	0.528689	0.61825	0.547414	0.160742	0.320069	0.23324	0.664402	0.693694	0.846608	0.246939	0.697436	0.209446	0.5712	0.755319	0.565916	0.25	0.257979	0.153061	0.575207	0.635714	0.458248	0.401653	0.444643	0.276986
CDK11B-11	CDK11B	x	0.301418	0.388889	0.318339	0.830508	0.642623	0.626543	0.242925	0.349081	0.790625	0.445498	0.615866	0.426692	0.578788	0.714286	0.68169	0.394558	0.493506	0.389706	0.725191	0.969349	0.563291	0.7875	0.762987	0.672043	0.488739	0.728421	0.272566	0.777311	0.591985	0.737805	0.237952	0.389091	0.945055	0.566532	0.95122	0.653025	0.501818	0.416667	0.297619	0.121359	0.160305	0.511864	0.0946602	0.152672	0.477966
CDK11B-12	CDK11B	x	0.520179	1.03879	0.7897	0.852381	0.841004	0.828947	1.31757	0.938953	0.932927	1.05758	1.0411	0.681957	1.19617	1.24138	1.01434	0.689655	1.42857	0.701422	1.32222	1.19844	1.20526	1.10985	1.06863	0.934109	1.00604	0.597523	0.663677	1.05349	1.27044	0.929648	0.838565	1.56	0.647343	1.06803	1.13043	0.910217	1.10995	1.6631	1.0905	1.575	0.669388	1.19244	3.37917	1.33061	1.12371
CDK11B-13	CDK11B	x	0.486928	0.894569	1.33813	1.15658	0.834507	1.06569	1.10875	1.00266	1.26014	0.846287	1.52404	1.21233	1.76573	0.93254	1.30592	1.0219	1.2803	0.862816	0.797143	1.81421	1.2234	1.79208	1.57865	1.55747	1.0844	1.29888	0.633826	1.27178	1.57267	1.03053	0.989051	1.01667	1.54723	1.16763	0.942356	0.834725	0.801688	0.58427	0.942623	1.43521	1.44568	1.25575	1.42298	1.00557	1.07417
CDK11B-14	CDK11B	x	0.3382	0.635762	0.413897	0.550289	0.544785	0.691899	0.2705	0.394352	0.327778	0.575758	0.483019	0.439969	0.378199	0.544554	0.523364	0.285714	0.464714	0.410824	0.362681	0.356944	0.436123	0.420875	0.367904	0.505241	0.330736	0.605907	0.440665	0.502259	0.615329	0.415469	0.526066	0.407163	0.419459	0.586062	0.570074	0.785492	0.38152	0.451362	0.295425	0.465596	0.569091	0.623693	0.380734	0.549091	0.622822
CDK11B-15	CDK11B	x	0.457306	0.524862	0.235185	0.870201	0.797127	0.979167	0.481947	0.651163	0.658654	0.635404	0.638273	0.60596	0.757396	0.795113	0.496552	0.528864	0.340111	0.484288	0.715835	0.996086	0.708911	0.858044	0.725111	1.12018	0.148108	0.292289	0.884462	0.909091	1.01872	1.06236	0.608621	1.21257	0.522766	0.854911	1.10888	0.881016	0.317391	0.374449	0.27619	0.689211	0.629794	0.827128	0.648953	0.643068	0.694149
CDK11B-16	CDK11B	x	0.125498	0.137066	0.140655	0.744246	0.620047	0.668258	0.114173	0.116776	0.242373	0.200514	0.250373	0.14377	0.540416	0.399103	0.601713	0.227074	0.134615	0.0831557	0.639344	0.799401	0.582927	0.50297	0.78719	0.51927	0.055336	0.0831683	0.047619	0.732092	0.681934	0.658333	0.0550847	0.277567	0.170588	0.477124	0.53626	0.455342	0.0929648	0.168565	0.11138	0.234899	0.267267	0.375	0.365772	0.250751	0.253012
CDK11B-17	CDK11B	x	0.420091	0.436893	0.23412	0.949227	1.00982	0.886161	0.351682	0.55058	0.280449	0.852288	0.723188	0.731343	0.673575	0.927984	0.733051	0.323944	0.261146	0.287671	1.12876	0.863962	1.01996	0.590682	0.644478	0.706557	0.6733	0.464348	0.213033	0.987374	1.06675	0.787179	0.510081	0.449807	0.408818	0.624041	0.735981	0.776957	0.312757	0.398707	0.568528	0.708084	0.747813	0.591724	0.823353	0.721574	0.987586
CDK11B-18	CDK11B	x	0.293249	0.41189	0.131846	0.664384	0.61978	0.660714	0.68323	0.810284	0.756432	0.577503	0.983845	0.912195	0.459584	0.221258	0.410835	0.482906	0.650901	0.638009	1.1776	1.09901	1.22616	0.592657	0.633681	0.728242	0.441281	0.437939	0.378698	1.01868	1.03614	1.21212	0.614815	0.629291	1.30369	0.423077	0.333333	0.344307	0.108871	0.213043	0.236902	0.642743	0.814935	1.11337	0.467305	0.436688	1.33333
CDK11B-19	CDK11B	x	0.597826	0.607143	0.786848	0.990033	0.887346	0.89198	0.464627	0.611015	0.942308	1.001	0.975223	1.00404	1.06748	1.02454	1.06038	0.30203	0.571106	0.894459	1.3237	1.03929	1	0.930175	0.868176	0.8	0.759201	1.08618	0.860403	0.912226	0.943885	0.745068	1.08768	1.07604	1.86025	0.712169	0.599134	0.701031	0.455446	0.617021	0.565826	0.207516	0.471624	1.38462	0.424837	0.383562	1.68654
CDK11B-2	CDK11B	x	0.443574	0.416555	0.256538	0.720253	0.702997	0.710042	0.433372	0.39174	0.507198	0.583885	0.453346	0.614246	0.604677	0.889029	0.585106	0.504478	0.624183	0.575758	0.407104	0.675987	0.634807	0.759322	0.582677	0.482759	0.39005	0.651911	0.395897	0.600186	0.582691	0.507246	0.485294	0.619433	0.464899	0.406621	0.394385	0.619224	0.55036	0.403226	0.516768	0.634197	0.457561	0.439709	0.515026	0.228293	0.401247
CDK11B-20	CDK11B	x	0.806998	0.966749	0.638425	1.08575	1.16074	1.04617	1.42257	0.915863	1.0713	1.33792	1.12832	1.10431	1.04743	1.41495	1.22399	1.33254	1.44312	1.05508	1.23318	1.34251	1.44702	1.17507	1.13756	1.26973	1.02372	0.772093	0.85102	1.11503	1.096	1.04712	1.55251	1.14392	1.05688	0.911721	1.17708	0.854881	0.859813	0.868531	0.924165	1.59764	1.09552	1.23131	1.83081	1.22031	1.13544
CDK11B-21	CDK11B	x	0.452693	0.684288	0.823009	1.23929	1.14533	1	0.784512	0.812562	0.979614	1.23285	1.13003	1.0497	0.93133	1.22055	1.03535	0.551282	0.630699	0.485251	1.8978	1.1377	1.20981	1.23865	0.970849	1.36364	1.20386	0.786501	0.996207	1.01997	0.799823	1.02039	1.05908	0.886946	0.836115	0.710843	0.689038	0.694199	0.703704	0.646865	0.640502	1.11534	1.0642	1.03935	1.40304	1.00218	0.958333
CDK11B-3	CDK11B	x	0.134367	0.459239	0.132743	0.616667	0.570957	0.527344	0.19084	0.177945	0.143266	0.270642	0.462644	0.281726	0.271478	0.443213	0.565217	0.413408	0.527473	0.47099	0.49569	0.469965	0.471545	0.268421	0.666667	0.555921	0.344473	0.10473	0.402116	0.612903	0.245009	0.482759	0.478548	0.509434	0.142857	0.259804	0.328383	0.6575	0.305085	0.3391	0.459732	0.449889	0.612033	0.235556	0.400891	1.12448	0.157778
CDK11B-4	CDK11B	x	0.293333	0.257253	0.26634	0.604701	0.684211	0.862613	0.266362	0.434231	0.366003	0.470333	0.388268	0.600639	0.876471	0.764706	0.604651	0.547917	0.292135	0.515528	0.571429	0.693642	0.833333	0.5376	0.661074	0.670473	0.454237	0.381188	0.473282	0.790974	0.829268	0.881779	0.481336	0.380515	0.355987	0.838428	0.803379	0.551435	0.258772	0.332594	0.314583	0.440934	0.553672	0.466565	0.446429	0.862994	0.25076
CDK11B-5	CDK11B	x	0.638376	0.632911	0.470356	1.13216	1.11715	1.08434	0.735043	0.590323	1.13514	0.690949	0.682382	0.814721	0.895833	1.08	1.00654	0.525097	0.755459	0.837838	1	1.26	0.848485	1.13305	1.03226	1.21886	0.962963	0.540698	0.630769	1.06499	0.920771	1.11034	1.22468	0.487685	1.20446	0.949886	1.28	0.69281	0.658228	0.632035	0.744589	0.746356	1.07317	0.97035	1.07872	0.924119	0.921833
CDK11B-6	CDK11B	x	0.701967	0.689956	1.00439	1.10502	1.26576	1.13405	0.637002	0.732104	0.91677	1.26266	1.07872	0.991651	0.818758	1.24178	0.913303	0.825806	0.872146	0.709333	1.05793	1.14809	1.0628	1.18813	1.10779	1.03058	1.16667	1.0947	0.872549	1.26046	1.30465	1.0324	1.3122	0.953925	1.13846	1.17642	1.02466	1.21193	0.762195	0.925197	0.700183	1.47707	1.32306	0.888889	1.14956	1.71804	0.695556
CDK11B-7	CDK11B	x	0.563412	0.474519	0.408291	0.956327	1.07772	0.899533	0.768595	1.07107	0.883895	0.669784	1.11841	1.06118	1.04639	0.912424	1.05101	0.562867	0.766789	0.533808	1.2898	1.17185	1.55329	1.07583	1.04429	0.99004	0.697289	0.846082	1.05967	0.79986	0.957173	0.83485	0.984813	0.994312	1.21396	1.25557	1.04377	1.05693	0.549937	0.742891	0.715232	1.16625	0.982379	0.772325	1.05128	1.5207	0.711987
CDK11B-8	CDK11B	x	1.42669	1.19883	1.32937	1.15586	1.23656	1.06595	1.67956	1.33079	0.987627	1.55882	1.1807	1.09263	1.13056	1.19527	1.67254	1.29393	1.59242	1.29902	1.4703	1.59619	1.54821	1.30119	1.24057	1.29988	1.37327	1.30829	1.74788	0.986957	1.27951	1.10168	0.771681	1.18211	1.35174	1.27484	1.41944	0.947971	1.28754	1.24132	1.54902	1.00904	1.62799	1.1673	1.00226	1.71248	1.82893
CDK11B-9	CDK11B	x	0.375	0.180451	0.586957	0.762195	0.618321	0.739837	0.78534	0.35567	0.395062	0.480392	0.588235	0.482014	0.661972	0.185185	0.224044	0.132867	0.208333	0.401575	1.35833	1.25191	0.848101	0.516667	0.356383	0.33871	0.595238	0.0466667	0.278481	0.558659	0.863415	0.644	0.363057	0.551181	1.63235	0.390135	0.328947	0.428571	0.462963	0.266055	0.0866142	0.0645161	0.760736	0.741573	0.212903	0.128834	1.03933
CDK12-1	CDK12	x	0.222857	0.467811	0.359281	1.00549	0.807292	1.0241	0.45122	0.492386	0.307692	0.222656	0.641221	0.639847	0.868056	0.506608	0.692771	0.419355	0.708861	0.125	0.635135	0.917722	1.68027	0.494949	0.365482	0.327586	0.431624	0.493421	0.281346	0.773852	1.08171	0.67433	0.585	0.28	0.0535714	0.226006	0.784404	0.470046	0.35119	0.422819	0.486842	1.04082	0.726891	1.07563	1.11224	0.554622	0.903361
CDK12-10	CDK12	x	0.572043	0.381313	0.487562	0.664671	0.79661	0.663774	0.416667	0.441774	0.386282	0.515015	0.594059	0.761905	0.82381	0.772643	0.767943	0.528708	0.593583	0.504478	0.853591	0.791237	0.745763	0.5	0.431942	0.729897	0.677239	0.638983	0.739024	0.69932	0.885075	0.922137	0.761603	0.787879	0.423963	0.601786	0.616852	0.463023	0.375358	0.283951	0.380165	0.372781	0.880295	0.722222	0.473373	0.504604	0.723958
CDK12-2	CDK12	x	0.261261	0.3916	0.233259	1.02177	1.1141	0.792194	0.205365	0.241211	0.170455	0.283871	0.226597	0.257649	0.813288	0.442308	0.795111	0.222089	0.317872	0.196222	0.575486	0.658031	0.761364	0.276873	0.206759	0.289122	0.24748	0.215859	0.163966	0.464808	0.450393	0.553521	0.22248	0.257803	0.263858	0.310314	0.360992	0.33359	0.195448	0.270308	0.146277	0.42868	0.376601	0.292	0.204424	0.357814	0.2928
CDK12-3	CDK12	x	0.520755	0.293103	0.235099	0.598958	0.767857	0.681818	0.24924	0.312	0.246951	0.489091	0.550296	0.532731	0.805233	0.465789	0.512968	0.264706	0.281967	0.429752	0.578125	0.620805	0.729373	0.34009	0.156576	0.255914	0.247104	0.303237	0.571084	0.728632	0.636735	0.700234	0.18123	0.181208	0.538462	0.304419	0.315878	0.320611	0.22541	0.169725	0.108	1.10381	0.603175	0.216066	1.44637	0.301587	0.398892
CDK12-4	CDK12	x	0.541203	0.308977	0.63908	0.983607	1	0.89662	0.376953	0.703704	0.598413	0.646715	0.708535	0.54314	0.889126	0.883534	0.919861	0.413567	0.711628	0.555102	1.26087	1.21462	0.867322	0.585124	0.429048	0.592	0.725	0.637097	0.772973	0.450147	0.727856	0.746094	0.98234	1.14596	0.464088	0.8112	0.655882	0.608696	0.467532	0.682809	0.515385	0.575	1.00173	0.433278	0.555	0.792028	0.594728
CDK12-5	CDK12	x	0.453512	0.344991	0.567108	1.05815	0.88758	0.903357	0.218527	0.254428	0.305892	0.357572	0.341632	0.422056	0.940693	0.963403	0.80226	0.316284	0.375289	0.308943	0.793407	0.761134	0.879691	0.26722	0.2882	0.288955	0.300864	0.301382	0.452978	0.810118	0.573529	0.741627	0.387996	0.640312	0.418085	0.426339	0.347648	0.452015	0.433333	0.391148	0.235363	0.590577	0.647994	0.420547	0.385865	0.277063	0.439763
CDK12-6	CDK12	x	0.593607	0.205882	0.234513	0.690583	0.739726	0.74	0.193299	0.236923	0.482639	0.316216	0.177083	0.532423	0.501887	0.373494	0.590308	1.76496	0.196787	0.258621	0.489011	0.464481	0.416185	0.283262	0.248062	0.321429	1.5209	1.0786	0.0758621	0.486405	0.411765	0.352151	0.0881057	0.180095	0.344697	0.279743	0.232044	0.39576	0.290323	0.239024	0.0733945	0.685897	0.718519	0.670213	0.179487	0.388889	0.446809
CDK12-7	CDK12	x	0.455108	0.346614	0.840361	0.811644	1.10702	0.88	0.34633	0.17561	0.364912	0.610687	0.301075	0.435518	0.527778	0.462963	0.847518	0.211321	0.221429	0.540351	1.07692	0.97351	1.02952	0.232323	0.354762	0.154018	0.645833	0.368996	0.36715	0.767442	0.503158	0.630435	0.0784983	0.257937	0.11	0.314961	0.342437	0.344186	0.200803	0.15534	0.267442	0.639024	0.563275	0.563953	0.682927	0.665012	0.627907
CDK12-8	CDK12	x	0.075	0.235294	0.65641	0.746479	0.68617	0.5	0.192453	0.161572	0.388235	0.236515	0.398406	0.435685	0.313725	0.353535	0.531818	0.306878	0.223529	0.438889	0.631902	0.678832	0.493421	0.417476	0.347826	0.453782	0.0978593	0.429412	0.325581	0.42	0.420886	0.74386	0.23445	0.664894	0.333333	0.512545	0.213768	0.26972	0.517241	0.323944	0.0318471	1.07059	0.275862	0.790123	0.894118	0.369906	1.44856
CDK12-9	CDK12	x	0.345506	0.5	0.297619	0.717718	0.592308	0.706186	0.554377	0.256809	0.523596	0.411417	0.285455	0.592308	0.377778	0.689487	0.367725	0.521964	0.301493	0.314136	0.646341	0.322674	0.490506	0.288546	0.396624	0.420253	0.552301	0.630137	0.266075	1.13271	0.903328	0.810219	0.474286	0.488166	0.527607	0.465306	0.416507	0.364086	0.270115	0.437956	0.318996	0.538899	0.210127	0.58125	0.690702	0.189873	0.872917
CDK13-1	CDK13	x	0.843333	0.441696	0.406433	1.025	1.05106	0.752727	0.406332	0.67029	0.305764	1.14607	1.16129	1.08152	0.577947	0.745614	0.980843	0.400735	0.628253	0.388889	0.480144	0.590164	0.684466	0.366548	0.318937	0.324841	0.940741	1.09019	0.723785	0.883838	0.961224	0.73428	0.316129	0.422939	0.526515	0.922374	0.917004	0.780127	0.912037	0.510121	0.710204	0.555233	0.644886	0.511327	0.494186	0.488636	0.148867
CDK13-10	CDK13	x	0.658879	1.05046	0.753086	0.950549	1.14356	0.951456	0.825532	0.570588	0.548246	1.40647	1.09404	1.1039	0.893048	0.753425	0.700935	0.626263	0.738462	0.656716	0.664286	0.550725	0.779006	0.333333	0.374502	0.56621	1.4502	0.581395	0.759657	1.21652	1.06534	1.11615	0.719149	0.423581	0.495455	0.640483	1.18657	1.01967	0.811429	0.65641	0.795812	0.840678	0.980769	0.79845	0.623729	1.05769	0.430233
CDK13-2	CDK13	x	0.728281	0.566406	0.534338	0.95122	0.867704	1.10575	0.376081	0.42069	0.639576	1.15976	1.65639	1.21852	0.561587	0.576402	0.891156	0.518908	0.527083	0.516187	0.646552	0.590244	0.684492	0.326047	0.422101	0.360714	1.13478	0.610092	1.14605	0.896861	0.988789	0.814607	0.411263	0.240132	0.50369	0.967337	0.843575	0.908636	0.723542	0.772523	0.655556	0.481432	0.747782	0.594595	0.562334	0.591888	0.398293
CDK13-3	CDK13	x	0.904412	1.49362	1.375	0.921769	1.35458	1.02222	0.649077	0.779528	0.720994	1.65764	1	1.32035	0.795858	0.636656	0.79402	0.76259	0.60828	0.422764	1.25389	0.854331	0.722022	0.832432	0.54908	0.530612	0.852691	1.3408	1.25	0.91018	1.18826	0.946067	1.43636	1.18182	1.22609	1.1589	0.850806	1.05172	0.799127	0.84252	0.81323	0.62381	1.2285	0.814016	0.771429	1.27764	0.557951
CDK13-4	CDK13	x	0.423841	0.417219	0.253086	0.614458	0.6	0.827381	0.364929	0.785714	0.272727	1.40722	1.21963	0.99095	0.539062	0.534483	0.632558	0.374101	0.432927	0.162602	0.267974	0.87069	0.346667	0.153846	0.268041	0.0896861	0.583969	1.02	0.233429	0.616071	1.3045	0.513514	0.669065	0.112069	0.253425	0.633621	0.801619	1.29032	0.453333	0.385321	0.42069	1.27313	1.10983	0.861244	0.524229	0.104046	0.818182
CDK13-5	CDK13	x	1.06803	1.09969	0.879888	0.963687	1.14398	0.895674	0.58018	0.462214	1.01523	1.80233	1.15631	1.67331	1.13089	0.732906	0.631356	0.572973	0.647754	0.47619	0.751232	0.602804	0.720339	0.493697	0.328358	0.454894	1.51631	1.54319	1.88363	0.941681	1.12423	0.963397	0.911063	0.48184	0.712159	0.982824	0.885075	1.28504	0.783708	0.877907	0.514286	1.26527	0.792608	0.579245	1.19895	0.772074	0.296226
CDK13-6	CDK13	x	0.900383	0.845018	0.930041	1.02166	0.835962	1.2749	0.778116	0.666667	0.428212	2.08355	1.48681	1.3552	0.969605	0.743119	0.852941	0.838863	0.84322	0.582707	0.900735	0.890977	1.19926	0.624352	0.565116	0.496568	1.49123	1.14066	1.08555	1.02332	1.43299	1.17164	0.724891	0.525	1.52917	0.981221	1.1236	0.82495	0.851852	1.24103	0.75	0.6	0.849057	1.03571	0.521053	0.833333	0.88961
CDK13-7	CDK13	x	0.464286	1.10211	0.991071	0.832258	0.811189	0.987055	0.406528	0.81388	0.594444	1.26684	0.997706	1.28818	0.596107	0.585938	0.806748	0.485232	0.979079	0.508306	0.688356	1.09294	0.5875	0.344828	0.481707	0.356322	2.98571	0.963928	1.44471	1.10178	0.696471	1	0.4625	0.239203	1.20784	1.23342	0.623902	1.07	0.813008	1.42347	0.623377	0.747283	0.576819	1.00314	0.690217	0.345013	0.899371
CDK13-8	CDK13	x	0.794749	0.620137	0.510441	0.856383	1.00495	1.10324	0.534118	0.387833	0.442266	1.28814	1.30851	1.07799	0.592798	0.66323	1.00556	0.620112	0.484375	0.587879	0.578171	0.445183	0.822006	0.468571	0.305732	0.375494	1.02521	0.924731	0.554945	1.07719	0.817771	0.683837	0.414216	0.671018	0.356522	0.928205	1.13636	0.971761	0.466292	0.556962	0.525862	0.955508	0.505376	0.772257	0.324153	0.348387	0.774327
CDK13-9	CDK13	x	0.604779	0.591837	0.669659	0.79442	1.00741	0.809524	0.714519	0.795948	0.59396	1.0643	1.35624	1.37989	0.952941	1.00494	1.06919	0.950298	0.685353	0.658273	0.821678	0.868069	0.93595	0.719323	0.709064	0.603947	1.47988	1.69039	1.32541	1.2797	1.02682	0.897358	0.542495	0.474333	0.73251	1.01546	1.44377	1.4238	0.617834	0.851598	0.609705	0.759756	0.629577	0.509537	0.562195	0.449296	0.540872
CDK14-1	CDK14	x	0.522267	1.31683	0.663793	1.2428	1.22271	1.22174	0.757377	0.824561	1.684	1.43478	1.36517	0.764128	0.825726	0.582143	0.715447	2.43434	1.36986	1.4837	1.08219	1.67485	0.954545	0.811448	1.09167	1.13889	0.802419	1.09524	1.18836	1.51818	1.09524	0.980822	1.60455	1.12019	1.51852	0.930693	0.64899	1.61364	1.13291	1.03077	1.19	0.557823	0.884013	0.888525	0.659864	0.749216	0.32459
CDK14-10	CDK14	x	0.891519	1.01525	1.18408	1.12261	1.19075	1.02124	1.56995	1.30464	1.04836	0.837327	0.819137	1.14815	1.02079	1.04462	0.90161	0.912162	1.00808	0.772358	1.31818	1.10996	1.41739	0.976119	0.963272	0.844408	0.767442	1.07776	1.42857	1.01587	1.00745	0.978808	0.956063	0.650376	1.06042	1.09959	1.1466	1.04783	0.787879	0.747685	1.04156	1.40278	0.878561	1.11861	1.84028	1.06897	1.44708
CDK14-2	CDK14	x	1.40777	0.826733	0.872685	1.03008	1.05759	1.00966	1.26426	1.2758	1.31458	1.40968	1.10579	1.17168	1.05412	0.838462	1.10479	1.16851	1.16053	0.775068	1.04678	1.13296	1.10448	1.15203	1.2022	0.815353	0.656863	1.0814	0.967914	1.49449	1.10548	1.51729	1.17647	1.4033	0.809524	1.27389	1.18	0.998261	0.88	0.809769	0.864362	1.33077	1.23529	0.5613	2.61538	0.998217	0.548006
CDK14-3	CDK14	x	1.34457	1.42051	1.20399	0.93177	1.09756	0.847875	1.81878	0.977679	0.778094	0.967098	1.26676	0.871275	1.21556	1.1146	1.33761	1.4826	1.01226	1.14619	1.07532	0.959488	1.02895	1.01286	0.634823	1.02551	1.28802	0.820896	0.79863	1.22965	1.22749	0.958333	1.4605	1.33116	1.49187	1.01142	1.02455	1.0052	0.868644	1.11316	1.04502	1.21905	1.05286	0.961178	1.0746	0.48605	0.771084
CDK14-4	CDK14	x	1.13655	1.24715	1.15118	0.862786	0.832311	0.877828	1.00284	0.88244	0.875236	0.897574	0.988304	1.04971	0.601093	1.26651	0.788793	1.18288	1.40157	0.848101	0.651163	0.685345	0.738095	0.752122	0.924956	0.855196	1.96881	1.57554	0.917058	1.02	1.02295	1.0401	0.884404	1.27655	0.861723	1.02135	0.845161	1.08981	1.0218	0.922252	0.814645	1.64448	1.18861	0.713821	1.91234	0.882562	0.58374
CDK14-5	CDK14	x	0.676259	0.886076	2.86813	0.709677	0.981651	1.14796	0.820588	0.772222	1	1.36893	1.12245	1.39927	0.605166	0.587302	0.646809	0.767241	1.40594	1.38333	0.732673	1.24528	0.822581	0.649057	0.584034	0.795455	0.559727	0.473896	1.55516	1.0285	0.647783	0.859951	3.636	2.3681	1.50237	0.803419	0.924012	0.717579	0.754864	0.75	0.704225	1.11438	0.966912	1.00926	0.849673	0.661765	0.981481
CDK14-6	CDK14	x	0.566667	1.19914	0.857715	0.891784	0.953578	0.919732	0.851794	0.786708	0.786753	0.847185	1.24642	0.849425	0.811092	0.957768	0.92126	0.855731	0.807851	0.962076	1.1875	0.96325	1.12315	0.697531	0.967593	0.617647	0.706461	0.691899	0.610955	1.19298	0.908985	0.873464	1.18657	1.00949	1	0.814972	0.823928	1.06349	0.741551	0.742222	0.785548	0.823841	0.726496	0.89911	0.796026	0.700855	0.958457
CDK14-7	CDK14	x	1.10422	1.15014	1.03253	0.90327	0.903226	0.971342	0.870748	1.06962	1.2328	1.18982	0.941343	1.10887	0.763298	0.792254	0.801825	0.97619	0.968632	1.00432	0.847095	0.714286	0.894334	0.898096	1.01401	0.909639	1.05519	1.01978	1.10259	1.12658	0.904653	1.19319	0.920193	0.736903	1.06099	0.839354	0.699307	0.760976	0.872131	0.697015	0.786667	0.892157	0.930556	1.33444	0.45098	1.08704	0.897778
CDK14-8	CDK14	x	1.07542	1.10169	0.962779	1.09836	1.22543	1.19335	1.1775	1.08142	1.52104	1.32937	1.74401	0.95664	1.07429	1.11166	1.25581	1.20321	1.3403	1.25	1.75177	1.3964	1.4645	1.24153	1.03846	0.90249	1.39959	1.11429	0.977982	1.2492	1.13314	0.998559	1.09639	1.11276	1.17135	1.20181	0.940692	0.86783	1.03937	1.50613	1.58929	1.05784	1.44173	0.940187	1.13246	1.2406	1.01121
CDK14-9	CDK14	x	1.46948	1.29122	0.802387	0.984589	1.29734	0.9721	1.18355	1.34621	1.3842	1.13803	1.11921	1.20576	1.43802	1.22014	1.23034	1.3137	0.973574	1.01252	1.1744	1.45611	1.31063	1.13405	1.16385	1.43028	1.06924	1.12851	1.28571	1.11008	1.08392	1.06745	1.39945	1.16424	1.50303	1	1.012	0.989051	1.35893	1.48012	1.00962	1.3312	1.24474	0.785489	1.3738	1.1495	1
CDK15-1	CDK15	x	0.875	1.10695	0.705128	1.22989	1.06667	1.1227	1.10329	0.759091	1.65248	0.575875	0.760417	1.48485	1.26705	0.668449	1.36019	1.20548	1.01266	0.705521	1.04762	1.0202	1.09615	1.29104	0.903846	0.857143	0.781513	1.2898	0.362963	1.01435	1.0042	0.929204	2.84211	0.639456	0.536913	0.856187	0.862676	0.991189	0.585526	0.753165	1.06211	0.599138	0.979899	1.29688	0.732759	1.0402	1.67188
CDK15-10	CDK15	x	1.56522	1.44203	1.16974	0.898955	1.25725	1.33597	1	1.21935	0.755924	1.22222	1.15052	0.975309	2.05213	1.0767	1.29276	0.929889	1.15139	1.36789	1.17255	1.5	1.04531	1.33799	1.3219	1.10402	1.89919	1.21765	0.912114	0.756654	0.840445	1.27313	1.25333	0.776062	1.72822	1.15892	1.85252	1.05657	1.12453	0.907407	1.20152	1.58794	0.436009	2.0094	2.07286	0.969631	1.88088
CDK15-11	CDK15	x	1.12454	1.03605	1.21237	1.01584	0.969307	0.878425	1.02547	0.80207	0.890855	1.16639	1.07161	1.04065	0.914137	0.804651	0.924334	0.922827	1.2309	0.968839	0.870457	1.06831	0.917293	1.35736	1.38427	1.3057	1.12339	1.39402	0.895846	1.04502	0.864836	0.975216	1.39286	1.18874	1.5023	0.92789	1.02847	0.871096	1.10218	0.903564	1.08473	0.743529	1.23117	1.03618	0.658235	1.18961	1.31945
CDK15-12	CDK15	x	1.25965	1.14665	1.27313	0.912969	1.01422	1.15683	1.08316	1.56234	1.39085	1.23782	1.28217	1.13722	1.09857	1.1145	1.2516	1.13761	1.47455	1.27721	1.33021	1.26499	1.3512	1.31929	1.26271	1.28834	1.38945	2.33333	1.71829	1.0474	0.960282	1.05707	1.31674	1.73293	1.79967	1.16649	0.952137	1.28606	1.20446	1.40785	0.945724	0.995521	0.911036	1.09367	0.949608	0.972973	1.21533
CDK15-13	CDK15	x	1.41889	1.74239	1.28094	0.840367	1.02477	0.973948	0.865711	0.988014	0.761255	0.796791	1.00129	1.162	1.21561	0.824092	0.841935	0.914938	1.11034	0.786325	1.4039	1.00223	1.25068	1.19784	1.01108	1.01913	1.23445	1.04746	1.44493	1.0422	1.01722	1.08128	0.51028	0.912871	0.797048	1.11266	1.11664	1.03933	1.07483	0.842353	0.922917	1.16385	0.926562	1.24928	1.49831	0.717187	1.34241
CDK15-14	CDK15	x	0.822934	1.28221	1.14364	0.963756	0.81762	0.877342	0.716515	0.894309	1.19176	0.981176	0.927007	1.01525	0.964744	1.11092	0.916797	0.903577	1.05667	0.878837	1.08402	0.68	1.14354	0.967871	0.954351	1.34789	1.41351	0.769343	1.53404	0.684832	1.19408	1.12676	1.07822	1.04032	0.835526	1.08273	0.885542	0.875862	0.947653	0.78453	0.831683	1.02567	1.01453	0.614679	0.684947	0.85109	0.844037
CDK15-2	CDK15	x	0.877506	1.14286	1.43722	1.05871	0.958661	1.07529	1.29478	1.40862	1.04042	0.887268	1.10332	1.22188	1.18717	1.14496	0.922628	0.980435	0.839757	1.1317	0.912014	1.01905	1.20739	1.44882	1.1509	1.00736	0.908966	2.01141	0.523118	1.05183	1.14971	1.26172	1.67532	1.13466	0.734848	0.91125	0.908084	1.0403	1.21921	1.26667	1.28312	0.786667	1.31786	1.48419	0.82963	1.24821	1.14642
CDK15-3	CDK15	x	1.38294	1.10092	1.01633	1.11776	0.947566	1.21247	0.790654	1.39415	0.83304	1.34043	1.13385	1.01783	1.43124	1.23848	1.21229	1.25339	1.01944	0.767773	1.04571	1.47722	1.27948	1.47059	1.27302	1.15289	0.505034	0.75	0.810284	0.919654	1.11405	0.927296	1.19613	0.601156	1.10108	0.934109	1.61778	1.29215	1.10204	1.08852	1.49144	0.917874	1.18353	0.74569	1.02738	0.713873	0.783046
CDK15-4	CDK15	x	0.963476	0.848656	0.638633	0.960947	1.28078	1.08199	0.830233	0.800539	1.18496	1.15608	0.998302	0.984071	1.09507	1.00862	1.08886	1.06847	1.20628	1.16716	1.34059	1.2336	1.0445	0.970936	1.24821	1.05927	0.918831	1.4139	1.20484	1.16622	0.949914	0.995548	1.05433	1.0037	1.04662	1.17627	1.02157	1.15616	1.09161	1.28908	1.06126	1.41004	1.0011	0.684724	1.41841	0.981319	0.746479
CDK15-5	CDK15	x	0.872541	0.840367	0.953608	0.983361	0.930153	1.15753	0.817232	0.907231	1.01686	0.908586	1.03651	1.03139	1.17368	1.37205	1.25822	0.920651	0.892505	0.944928	1.06323	1.06216	0.867248	1.09071	1.25775	1.14974	0.75814	0.74865	0.837693	0.969437	1.14659	1.185	1.40984	1.85571	1.11339	0.94994	0.995452	1.19497	1.01963	0.81998	0.922768	1.09432	1.16699	0.716276	1.30731	1.42682	0.915136
CDK15-6	CDK15	x	0.828496	1.72139	0.982278	1.1028	1.08091	0.941309	1.08577	0.927019	0.961149	1.18116	1.30792	1.69132	1.05253	1.14387	1.21826	1.52778	1.2896	1.68031	1.61808	1.21588	0.98773	0.714286	1.23455	1.19831	0.567145	1.08561	0.754745	0.839726	0.787293	1.60126	1.24173	0.916268	0.900243	1.06495	1.36213	1.2809	1.2507	0.934673	0.782152	1.15548	0.618962	0.993464	2.18167	0.488372	1.061
CDK15-7	CDK15	x	0.94717	0.998141	0.685437	0.862963	0.888288	0.905222	1.07496	0.991974	1.28113	1.04172	0.890023	0.858333	0.944056	0.990461	0.890598	0.864693	0.819578	1.41284	0.726776	1.08135	0.955789	1.21773	0.770833	0.960411	1.07982	1.10989	0.442469	0.880184	1.30675	1.06486	1.06316	0.992278	1.88941	1.15424	1.03458	0.91438	1.0211	1.18205	1.09361	1.57903	1.09453	0.67378	1.67919	1.11965	0.728659
CDK15-8	CDK15	x	1.1984	1.21063	1.10577	1.3168	0.962963	0.951691	1.51167	1.54376	1.29861	0.915254	0.925816	1.15827	0.811088	0.858038	1.35677	1.16274	1.00234	1.38565	1.14092	1.15844	1.64943	1.14801	1.35175	1.09532	1.6018	2.26214	0.640056	0.819095	0.986649	0.765646	0.696507	1.11702	0.851931	1.07932	1.08531	1.00339	0.940092	1.37433	1.15857	0.665064	1.05082	0.88	0.900641	1.09016	0.735
CDK15-9	CDK15	x	0.978927	1.01258	0.770138	1.06714	1.13576	0.917219	0.64526	0.865753	0.567308	1.12676	0.981797	1.01885	1.07368	1.2007	1.04019	1.10789	0.655814	0.738758	1.18405	1.09247	0.912381	1.05045	1.22237	1.48356	0.720214	0.915912	0.6375	1.04076	0.983584	1.12882	1.45312	1.06433	2.33118	1.10269	0.908084	1.21533	0.834802	0.716814	1.07746	1.39796	0.852507	0.311902	1.36395	0.548673	0.329685
CDK16-1	CDK16	x	0.900398	0.808756	0.799587	0.974419	0.829885	1.1275	1.30609	1.38908	1.07638	1.04414	1.11429	1.05191	0.936019	1.04805	0.952381	1.12691	0.612069	1.1037	0.858427	0.928767	0.957507	0.817406	1.32391	0.972973	0.870656	0.936567	1.16635	1.19551	0.941104	1.00578	0.943563	0.877119	1.59732	1.08205	1.45349	1.0255	0.997807	1.28947	1.16351	0.407348	0.79732	0.6997	0.375399	1.08375	1.26276
CDK16-10	CDK16	x	1.13657	1.46113	1.16166	0.85122	0.80814	0.926829	0.835871	0.860835	0.871795	1.19371	1.03846	1.00334	0.929047	0.775056	0.787736	1.14835	0.747449	0.986842	0.95	1.18507	0.773333	1.46035	0.968254	0.889813	0.972678	1.08531	1.75	1.04814	0.827957	0.652975	1.02046	1.24913	0.569087	0.693053	0.998145	0.916667	1.39744	1.11799	1.12542	1.17692	0.74761	0.70122	1.78077	0.640535	1.06707
CDK16-11	CDK16	x	1.68345	1.21605	0.589888	1.275	0.926346	1.1326	1.0885	0.995736	1.00921	0.987552	1.60976	1.29592	0.878173	1.35503	0.97319	2.23929	0.587601	1.02091	0.978261	1.00298	1.03943	1.22664	1.29128	1.13514	1.25838	0.559072	0.764398	0.979695	1.14458	1.48515	1.27915	2.18328	0.716172	0.818182	1.21814	1.17263	1.01198	1.11702	0.940397	1.57398	1.03604	0.804933	1.47194	0.986486	1.31614
CDK16-12	CDK16	x	1.38611	0.734694	1.06077	0.92602	1.07474	1.01442	1.76905	0.964602	1.10513	1.09888	1.15157	1.15192	1.03125	1.1639	1.3009	1.10526	0.985632	1.31464	1.2087	1.20245	1.02926	1.09961	0.939203	1.1931	0.676208	1.03307	1.44536	1.30427	1.14762	1.02486	1.29721	0.984375	1.14045	1.01797	0.806324	1.34752	1.57732	1.02134	1.38312	1.02614	0.498141	1.20998	1.08497	0.36803	0.794179
CDK16-13	CDK16	x	0.880282	1.23868	1.55602	1.07258	1.01976	0.904059	1.46646	1.55294	1.73626	0.683099	1.54381	1.14212	0.720539	1.02518	0.921429	0.729927	1.44404	0.81203	1.21887	1.08333	1.33333	0.842975	1.15549	1.05571	0.745721	1.40071	3.31098	1.0044	1.13825	1.15725	0.60241	0.676558	0.923695	0.913753	0.929961	1.02857	1.14103	0.995556	1.00469	1.05	1.00287	1.03652	0.5625	1.09483	1.4691
CDK16-14	CDK16	x	0.847875	1.2102	0.746269	0.898901	0.822368	1.03417	1.19552	1.30993	0.912029	0.995769	1.19817	1.06279	1.25658	1.06416	0.802998	0.861538	1.27232	0.921659	0.866972	0.862651	1.03989	0.833333	0.843548	1.38901	0.84193	0.874028	0.547117	0.900115	0.866324	0.911162	0.44	0.415217	0.984914	0.81037	0.684284	1.04589	1.15072	1.11852	1.18138	0.850659	0.817221	1.06977	0.938507	0.651057	1.57245
CDK16-2	CDK16	x	1.68118	1.18102	1.10037	1.21669	1.11833	1.07266	1.45455	1.2056	1.42946	1.18554	1.06626	1.29749	1.00617	1.93253	1.18308	1.17024	1.26823	1.14604	1.32133	1.06977	1.47199	1.40047	1.27643	1.32483	0.887185	2.03333	1.8542	1.12967	1.00646	1.17929	1.25874	0.743622	0.680851	1.13186	1.34989	1.2361	1.16324	1.32035	1.2912	0.921634	1.49693	1	1.23068	1.22951	0.805903
CDK16-3	CDK16	x	1.59685	1.13921	1.14442	1.11842	0.936975	1.39512	1.00669	1.00666	1.24957	0.962585	1.052	1.15291	1.56858	0.936842	1.13629	0.786344	1.16667	1.03797	1.06625	1.26588	1.54478	0.971831	1.04	0.885125	1.77148	1.51859	0.806349	0.8125	1.01097	1.08396	1.23991	1.83212	0.889868	1.09972	1.17818	1.12363	1.00896	1.28148	1.2067	1.14522	1.4434	1.45876	1.68382	1.15472	2.10309
CDK16-4	CDK16	x	1.57729	2.53356	1.05618	1.21951	1.23248	1.16667	0.536752	0.954054	1.87443	1.24627	1.1949	0.993721	1.39737	1.83214	1.56187	1.29897	1.07	1.30233	1.54212	1.39308	0.810398	1.90936	1.37862	1.79887	1.02799	1.42418	1.06828	1.64669	1.01869	1.08515	0.78853	1.66775	0.603571	1.04806	1.4307	1.42675	1.9386	1.4635	1.62357	0.789855	0.635321	1.27073	0.975845	0.834862	1.31463
CDK16-5	CDK16	x	1.4701	1.79741	1.31624	1.18571	1.2	1.20401	1.08303	1.5855	1.14703	1.23264	1.1314	1.02841	1.19641	1.19614	1.39178	1.32752	1.4784	1.08293	1.18212	1.2417	1.48899	1.07679	1.5579	1.17877	1.21542	1.10981	1.41461	1.05327	1.12454	1.11611	1.16211	1.36075	1.15663	1.47116	1.01927	1.07283	1.15806	1.28076	1.21228	1.33962	1.40999	1.32675	1.27698	1.46132	1.30699
CDK16-6	CDK16	x	1.17647	1.27318	1.04654	1.13866	1.20605	1.12304	1.04814	1.00497	1.2327	1.53272	1.32269	1.34125	1.07737	1.37787	1.30893	1.50573	1.24448	1.44957	1.70804	1.46983	1.24867	1.54904	1	1.21927	1.7284	1.62791	1.7045	1.01454	1.25295	1.18349	1.17537	0.990654	1.04292	1.22633	0.967391	1.1097	1.56692	1.44578	1.36264	1.15426	1.32923	1.50046	1.28131	1.42952	1.31545
CDK16-7	CDK16	x	1.30298	1.40778	1.42266	0.952045	1.07282	1.09366	0.987097	1.48837	1.10837	1.39061	1.18944	1.29435	1.27832	1.25265	1.21485	1.01336	1.24532	0.933657	1.24578	1.14458	1.35552	1.24742	1.43634	1.19581	1.25141	1.6087	1.00966	1.32668	0.965587	0.998981	0.879859	0.839394	1.38577	1.16845	1.67143	1.24087	1.20128	1.14149	1.35673	1.42259	1.18468	0.855683	1.86802	1.00676	0.794381
CDK16-8	CDK16	x	1.96675	1.17273	1.27737	1.27327	1.17211	0.863524	1.1451	0.789562	1.15229	1.00927	1.40561	0.944444	0.88993	0.970732	1.04069	1.29812	1.37559	1.00585	1.23398	1	0.786325	1.1655	1.26984	1.19665	0.996732	1.14831	1.02239	1.01771	1.01153	0.846824	1.08315	0.630979	0.701721	1.0875	0.744186	1.39183	0.926829	1.15657	1.06486	0.819209	1.03541	0.987805	0.898305	0.82968	1.7439
CDK16-9	CDK16	x	1.01846	0.858766	0.797422	0.953445	0.859351	0.933786	0.770664	0.94012	0.84006	1.24277	1.18482	1.06744	1.1358	0.88748	1.24682	0.939441	1.158	0.846024	1.00189	0.785321	0.775207	1.30746	1.31064	1.04359	1.02998	1.22159	2.28144	1.20966	1.06473	0.861884	1.04715	1.02641	1.61785	1.07853	1.27027	1.03953	1.01423	1.012	1.22426	0.842896	0.791045	0.718447	0.540984	0.919154	0.915049
CDK17-1	CDK17	x	0.907121	0.998557	0.964942	0.980033	0.974874	0.949097	0.799776	0.775083	0.803995	0.882583	0.902316	1.07425	0.987578	0.731818	0.917065	1.16503	0.879875	0.799387	1.16075	1.04771	0.861111	0.743155	0.940582	1.11952	0.879433	0.941874	1.42333	0.768797	0.829361	0.761525	2.18612	0.490566	1.54122	0.820789	0.832604	0.653606	1.06134	0.877034	1.01818	0.739558	1.18161	0.962156	0.804668	1.11264	1.0539
CDK17-10	CDK17	x	0.762195	1.11333	1.42581	0.87907	1.27404	0.883333	1.27746	0.623016	1.3125	0.91018	1.40141	1.35882	1.52137	0.546358	0.893443	0.703226	1.09036	0.864407	1.015	1.0087	0.913534	1.24786	1.175	0.934708	3.15315	1.14573	1.11527	1.25993	0.579125	0.99711	0.937063	0.679348	2.37748	0.942249	0.722222	0.811146	0.754717	0.773684	0.957746	2.70776	0.954128	0.654206	3.15068	1.02752	1.40187
CDK17-2	CDK17	x	0.920596	0.57845	0.792771	0.883663	0.878981	0.924324	0.769343	0.719852	0.71381	0.779635	0.904531	0.807808	0.786385	1.00226	1.02625	0.878788	0.712159	0.70235	0.873508	0.665158	0.811828	0.940727	0.800731	0.709738	1.82456	1.12753	1.18846	1.09275	0.676906	0.606436	1.50342	0.935417	1.43794	0.843478	0.52327	0.569425	0.873391	0.724289	0.942993	1.6441	0.984429	0.922956	1.4566	0.956747	1.15566
CDK17-3	CDK17	x	1.09869	1.14521	1.12464	1.03329	1.17512	1.1912	1.13935	0.970684	0.778142	1.16667	0.967568	1.14005	0.995751	1.23977	1.1525	1.21451	0.969333	0.994169	0.938291	1.14856	0.88172	0.993304	0.926802	1.05053	1.87875	1.625	1.13846	1.00654	1.16696	0.979983	1.53535	0.551532	1.37889	0.765163	0.915287	0.885185	1.10292	1.18605	0.979042	1.14376	1.47342	1.37915	0.937632	1.79539	1.72279
CDK17-4	CDK17	x	0.990329	1.07113	1.23347	1.01047	0.899827	0.892027	0.982827	1.19461	0.849673	0.892601	0.954397	0.958486	0.706052	0.827303	0.780239	0.791075	1.12815	1.50521	1.0922	1.08475	1.15933	0.995708	0.718218	1	1.68211	1.28999	1.43741	0.84989	0.816057	1.13636	0.842402	0.99434	0.833333	0.814894	0.983664	0.956683	1.01446	0.780435	0.987421	1.00746	0.952446	0.789474	1.49552	1.08016	1.28421
CDK17-5	CDK17	x	0.855838	0.778409	0.934389	1.08166	1.01744	1.00386	1.12921	0.879066	0.926851	0.779491	0.914645	0.761388	1.06081	1.05355	0.966405	0.76506	0.918605	0.834761	1.14567	1.19766	0.87659	0.962925	0.76699	0.926648	1.69129	1.26305	1.3337	0.774023	1.01613	1.05572	1.29792	1.30395	1.17904	0.982883	0.832465	0.779267	1.00392	0.976387	0.821983	1.30293	0.97876	0.989274	1.16736	1.09176	1.0363
CDK17-6	CDK17	x	0.865625	1.47297	1.33724	1.05913	1.29752	1.00231	1.00476	1.10501	1.23529	1.27903	1.18696	1.12417	1.83235	1.50519	1.35351	0.7	1.03358	1.07527	1.66772	1.10462	0.983871	1.11508	1.22658	1.0419	1.34096	1.45597	1.08475	0.796848	0.925714	0.856913	1.25237	1.27826	1.29082	0.97181	1.11424	1.06379	0.863354	0.863799	1.11301	0.839695	1.80831	1.17632	0.374046	1.12702	1.44737
CDK17-7	CDK17	x	0.985887	0.885	1.02496	1.18454	1.09622	1.00799	0.956522	0.902996	0.980173	0.95838	0.966555	1.19025	1.34659	1.04056	1.18655	0.684654	0.857143	1.09434	1.04499	1.05537	1.12336	1.13666	1.10507	1.21532	1.3675	1.48498	1.29286	1.0512	0.821063	1.0218	1.93482	1.00169	0.60885	0.989437	0.874	1.183	1.05848	1.14108	1.00797	1.3837	0.445602	0.931787	2.00889	0.671296	1.45293
CDK17-8	CDK17	x	1.16886	1.29348	1.02368	0.833659	1.19409	0.926724	0.878299	0.772321	1.10972	0.815703	0.946252	0.753846	0.9631	1.42739	0.95122	0.689211	0.898925	0.95858	0.92936	1.27735	0.799136	1.155	0.969799	1.08961	2.00423	0.698333	0.60972	0.962175	1.0674	1.05826	1.28877	1.44969	1.20265	0.647631	0.922428	0.893482	0.893271	0.897177	0.632911	0.769829	0.77822	1.1363	0.892691	1.05046	1.07407
CDK17-9	CDK17	x	1.31799	0.787594	1.1104	0.904425	0.994208	1.17485	1.12116	0.746429	1.16508	0.98995	0.706877	1.10533	0.551181	1.09122	1.00562	0.907658	0.879386	0.691684	0.942529	0.909707	0.864807	0.883792	1.14809	1.09295	2.12917	1.20345	1.27377	0.919598	0.913842	1.08791	0.743137	0.805869	1.52928	1.08062	0.672053	0.898907	1.23134	0.944584	0.849879	0.940878	1.44122	1.05706	1.03041	1.80842	1.07846
CDK18-1	CDK18	x	0.527083	1.20497	1.10682	0.972574	1.12159	0.908696	1.06457	0.90378	0.987784	0.826144	0.703218	0.705416	1.16809	0.841699	0.766129	1.00746	1.26368	1.13542	0.946215	0.938017	0.908142	0.903134	0.877104	0.721358	0.743455	0.75067	0.748457	1.14124	1.14511	0.897668	0.495305	1.01675	0.646667	0.875	1.07338	0.911315	0.88642	0.965333	1.27326	0.827532	0.8928	0.940718	0.966772	0.8864	0.917317
CDK18-10	CDK18	x	0.907216	0.880081	0.569659	0.989708	1.12351	0.951987	0.706999	1.08437	0.774336	0.759956	0.86911	0.936027	1.00756	0.840065	1.08819	0.687898	0.74122	1.07156	0.765504	1.09483	0.776316	0.705015	0.676393	0.65536	0.640726	0.704428	0.515313	1.04118	1.01519	0.783708	0.312796	0.908397	0.84755	0.958955	0.784569	0.858079	0.945652	0.857895	0.722826	0.630753	0.887534	0.882749	0.618201	0.815718	1.04313
CDK18-11	CDK18	x	0.935484	0.764026	0.568992	0.643599	0.637809	0.792683	0.884401	1.1992	0.951754	0.979437	0.669714	0.635585	0.727273	0.935428	0.629522	0.817531	0.703154	1.02811	0.700665	0.771186	0.9117	0.589459	0.663235	0.672554	0.959815	0.729397	1.24617	0.79619	0.932203	0.967403	1.08442	0.752922	0.765	0.824385	0.946619	0.774379	0.823062	1.0797	0.858566	0.870311	0.679042	0.695274	0.907824	0.586826	0.830846
CDK18-2	CDK18	x	0.80974	1.04624	1.1049	0.845739	0.851043	0.847599	0.70056	0.719234	1.12362	0.875382	0.953711	1.01217	0.902128	0.600183	0.702952	0.945916	1.09317	0.910737	0.714839	0.847434	0.893333	0.703925	0.603759	0.618919	0.745992	0.776344	0.906329	1.1104	0.913161	0.978182	1.32039	1.57312	0.81153	0.818126	0.676094	0.915688	0.886494	1.06426	0.987013	1.27205	0.822414	0.797909	1.11792	0.665517	0.999129
CDK18-3	CDK18	x	0.917373	1.19203	1.40536	1.10579	1.24736	1.19612	1.23318	0.817814	1.13649	1.23116	0.93018	1.00795	1.44981	1.21503	1.35496	1.25197	1.15829	1.25137	1.51807	1.06535	1.47448	1.20785	1.08934	1.22313	1.15738	1.42784	1.30249	1.1541	1.35404	1.18559	1.49543	1.07513	0.792564	1.39939	1.18519	0.75983	1.42263	1.39916	1.26471	1.13723	1.52796	1.35484	1.28261	1.75683	1.54167
CDK18-4	CDK18	x	1.17826	0.8833	1.74777	1.12874	0.920168	1.23245	1.27306	1.51678	0.874608	0.915942	1.38119	1.09972	1.58354	1.25598	1.60449	1.10989	0.964876	0.944544	1.5442	1.37736	1.01408	1.03206	1.38817	1.19633	0.917342	0.610955	0.97962	1.23264	1.02195	0.791418	1.24109	1.25813	1.98812	0.94452	1.02969	1.10232	1.03721	1.21531	1.26694	1.28738	1.79965	1.12919	1.11628	2.28369	0.807018
CDK18-5	CDK18	x	1.54592	1.27437	1.59021	1.20596	1.02338	1.56352	1.43121	1.58947	1.75071	1.45789	1.37838	1.36196	1.71821	1.46053	0.88729	0.944928	1.25697	2.05263	1.34722	1.67919	1.29494	1.28381	1.06008	1.17484	1.16873	1.54352	1.44361	1.26233	1.23887	1.2809	0.953988	1.16667	0.606557	1.2627	1.61611	1.21183	1.44615	1.6548	1.73208	0.733475	1.7552	0.980477	1	2.41109	1.14534
CDK18-6	CDK18	x	1.28482	1.16475	1.35162	0.846561	1.07843	0.8	1.08348	1.17208	1.07514	1.07797	0.941653	1.05068	1.31105	0.811189	1.12059	1.13754	0.918367	0.720988	1	0.84472	1.03003	0.61657	0.742268	1.05618	1.49741	1.06383	0.934859	1.10866	1.09078	0.866197	1.08126	1.6	0.898585	1.27984	1.14225	0.836767	1.01235	1.16384	0.920863	0.688391	1.09265	1.25232	0.867617	1.09105	1.16698
CDK18-7	CDK18	x	1.14966	1.80844	1.14869	0.873278	0.804805	0.752747	1.05	0.646532	0.848544	0.710728	0.716165	0.525194	0.985549	1.29213	0.986159	0.748663	0.662577	0.70557	0.785714	0.546032	1.06542	0.510753	0.407631	0.427907	0.539683	1.51485	1.21118	0.838765	1.01417	0.820031	1.93451	0.786667	1.14325	1.24363	0.666179	0.960373	0.834734	1.27068	0.943343	1.6	0.895944	1.13333	1.31765	0.626102	1.28333
CDK18-8	CDK18	x	0.616838	0.948542	0.44306	0.538781	0.766129	0.719735	0.634286	0.75	0.71875	0.99385	0.542355	0.636266	1.01095	0.693312	0.660112	0.683594	0.89924	0.884211	0.718631	0.737319	0.931818	0.448521	0.532121	0.667116	0.998536	0.757009	0.611738	0.657464	0.858388	0.846659	0.785579	0.771171	0.929577	0.721946	0.764151	0.82563	0.743271	0.745055	0.965235	0.699869	0.748092	1.35519	0.606815	0.750636	2.28825
CDK18-9	CDK18	x	1.40177	1.31791	1.07429	1.36998	1.0261	0.966309	1.08478	1.62958	1.08115	1.20965	1.47639	1.41417	1.60311	1.36551	1.62982	0.872894	1.05772	1.42296	1.53223	1.31673	1.71984	1.23729	1.23256	1.55433	1.05721	1.42565	1.91611	1.1343	0.882246	1.05514	1.01187	0.891654	1.31485	0.938685	1.5776	1.27511	1.41794	1.22078	1.49369	1.46192	1.39591	1.16972	1.47912	1.3857	1.26147
CDK19-1	CDK19	x	1.48082	1.21172	0.968825	1.14388	1.00251	0.863454	1.27004	0.860781	0.795491	0.97031	0.98169	0.932353	0.841418	0.746589	0.828358	0.775229	0.92043	0.879121	0.948718	0.863636	1.04695	1.44275	0.925862	0.765734	1.60141	1.08304	0.846276	1.11838	0.777317	1.03288	0.518987	1.125	1.05044	0.846047	1.22023	0.948579	1.26966	0.860656	1.01385	1.2668	1.15468	1.02222	1.42566	0.68705	0.632479
CDK19-10	CDK19	x	1.05714	1.53968	1.11765	1.28732	1.08	0.978552	1.87773	1.57931	1.45749	1.54025	0.918963	1.03834	1.1453	1.11929	1.1797	1.22903	1.6587	0.910588	1.86928	1.20115	1.07614	1.29637	1.41015	1.16634	1.56007	1.1002	1.67671	0.912069	0.986555	1.33068	1.41714	0.951456	1.52439	1.1014	1.42265	1.02836	1.55696	1.80936	1.62752	1.12679	0.772532	1.22838	0.850716	0.845494	1.28825
CDK19-2	CDK19	x	0.958621	1.7678	1.41606	0.773171	1.18627	1.17073	1.2268	0.880374	1.37352	1.31308	1.31034	1.14003	0.972603	0.838202	0.732535	1.49206	1.04239	1.58105	1	1.12565	1.35915	1.38537	1.2437	1.48837	0.966102	1.39655	0.725962	1.17255	1.09062	1.46667	0.747549	1.49024	1.2679	1.11395	0.986111	1.42745	1.14326	0.897143	1.13772	1.1359	0.38676	0.784047	1.19675	0.350174	1.37549
CDK19-3	CDK19	x	1.2517	1.10616	0.92674	0.818182	0.9	0.768908	1.24825	0.981073	0.478947	0.931759	0.766667	0.5975	1.01515	0.794521	0.974874	1.06667	0.845283	1.12069	0.818966	0.772021	0.94186	1.27632	1.02206	1.17264	0.64532	1.34228	0.940171	1.13776	1.0186	1.30056	2.46565	0.65587	0.575658	0.862069	0.827423	0.910615	1.31604	1.03153	0.762931	0.688654	0.618619	1.09328	0.746702	0.564565	1.02239
CDK19-4	CDK19	x	0.842391	0.849153	0.751515	0.909233	0.965278	1.0914	1.06158	0.97	1.33582	1.00493	1.04177	0.843826	1.26265	1.15436	0.897959	1.11095	1.07887	1.00157	0.840708	0.947858	1.28274	0.903226	0.982583	0.925575	0.831667	1.40172	0.910692	1.06868	0.976937	1.02071	1.09546	1	0.933333	0.924675	1.14987	1.05577	1.41454	0.860697	1.03181	1.04952	0.579117	0.64456	0.845942	0.434876	0.650777
CDK19-5	CDK19	x	1.30822	0.430769	1.67458	0.933735	0.971338	1.1037	1.03944	0.976864	1.08696	1.30924	0.998124	0.83859	1.39796	1.03198	1.18837	0.957237	1.15714	1.63983	1.17204	0.973941	2.37273	1.30221	1.14706	1.29024	1.19178	1.11582	1.36364	0.642249	1.25948	0.876812	0.411067	1.79537	0.846442	1.0618	1.03629	0.872093	1.20601	0.94186	1.31048	1.23665	1.82892	1.66931	2.47153	2.35663	2.02646
CDK19-6	CDK19	x	1.11849	1.39319	1.21558	0.925	0.848723	0.717993	1.20173	0.779238	0.620238	0.827969	1.0678	1.01111	0.854167	0.680297	1.05477	1.17608	0.924494	1.25502	0.770115	0.663067	0.953333	0.910369	0.65674	0.897924	0.643312	0.600414	1.4262	0.736677	0.920998	0.862275	1.21887	1.52903	1.15361	1.27466	0.954847	0.822492	0.843206	1.09792	1.00954	0.870056	0.945666	1.00881	1.03249	0.904269	1.22893
CDK19-7	CDK19	x	1.04454	1.78013	1.07078	1.22172	1.1178	1.08434	1.29822	1	0.822222	1.17788	1.09028	1.13864	0.95525	1.24074	0.845703	1.19712	1.00225	0.954373	0.997955	1.06341	0.770202	1.086	1.14077	1.0544	0.914894	1.01242	0.688854	1.13755	1.06519	0.758772	1.72941	0.856263	1.44363	1.22533	0.823529	1.71138	1.35967	1.14118	1.35262	1.18738	0.982143	1.35424	1.8284	0.858929	1.369
CDK19-8	CDK19	x	1.125	0.648562	1.39249	1.18725	1.28889	0.809211	1.14164	0.890533	0.703226	1.37975	1.27665	0.818386	0.865385	1.72868	1.17241	1.17422	1.30421	0.79257	0.809735	0.805147	1.28571	0.955679	1.15549	0.895765	1.2005	0.380665	1.06024	1.09205	0.904051	1.18252	2.15878	0.976109	1.27321	0.738938	1.01671	1.1962	0.877395	0.819608	1.02672	0.930769	1.07289	0.723785	0.741026	0.959184	0.511509
CDK19-9	CDK19	x	1.30794	1.17631	0.99726	1.44141	0.915254	0.964179	1.60993	0.669031	1.08128	1.06827	1.42922	0.766497	1.28947	1.21386	1.0273	0.969359	1.10086	1.43574	1.00896	1.05932	1.18361	1.1455	1.52804	1.10076	0.893976	0.661856	0.814815	0.796	1.11896	0.97893	1.01389	1.39068	2.8412	1.24409	1.42494	1	1.04895	1.13704	1.00752	2.66667	0.866944	0.671024	2.15306	0.683992	0.893246
CDK2-1	CDK2	x	1.09971	0.79538	0.954064	0.654255	0.656934	0.755556	0.400485	0.251834	0.214118	0.820862	0.646341	0.641791	0.723776	0.433628	0.621711	0.410072	0.312121	0.266234	0.458484	0.275758	0.517928	0.35942	0.432665	0.344444	0.836207	0.0637363	0.0697674	0.476987	0.707224	0.559853	0.205128	0.350168	0.299479	0.504149	0.337945	0.631043	0.299213	0.363934	0.318021	0.979021	0.31422	0.174672	0.703963	0.126147	0.445415
CDK2-10	CDK2	x	0.725207	0.630515	0.804124	0.594843	0.782787	0.863839	0.367769	0.274924	0.304348	0.534704	0.670977	0.777937	0.670306	0.888889	0.773619	0.541485	0.415507	0.404624	0.292017	0.409195	0.495146	0.31831	0.373353	0.482696	0.359375	0.372093	0.297496	0.826241	0.589474	0.631902	0.52677	0.473198	0.660617	0.567847	0.525285	0.436198	0.441109	0.443155	0.376417	0.754839	0.240924	0.518828	0.41129	0.19802	0.425384
CDK2-2	CDK2	x	0.850891	0.959375	0.553259	1.11494	0.939394	0.880121	0.603175	0.464674	0.661747	1.14487	0.968341	0.787637	0.95	1.03759	0.905185	0.597496	0.462406	0.500846	0.781457	1.07692	1.08304	1.13655	0.82167	1.18629	0.612167	0.23119	0.377515	0.700315	0.746298	0.9375	1.0303	0.428058	0.73494	0.748108	0.729	0.835928	0.503018	0.495726	0.533066	0.681176	1.04146	0.839599	0.445882	1.01098	0.857143
CDK2-3	CDK2	x	0.547804	0.893455	1.06724	0.955752	0.893939	0.801953	0.443678	0.5	0.334353	0.633498	0.889535	0.665678	0.739568	1.03279	0.645862	0.512	0.483063	0.375767	0.545966	0.783505	0.439873	0.646541	0.812912	0.587484	0.380102	0.521739	0.292405	0.687316	0.763339	0.735949	0.647297	0.87553	0.602606	0.858289	0.502383	0.532328	0.470037	0.392384	0.344948	0.605212	0.549779	0.7	0.506757	0.664823	0.651042
CDK2-4	CDK2	x	0.716327	1.59413	1.02614	0.881391	0.820823	0.717778	0.306548	0.364341	0.360396	1.21948	1.23329	1.30435	0.632754	0.393305	0.94186	0.234086	0.461333	0.281184	0.522936	0.690998	0.751979	0.419014	0.533049	0.313559	0.277293	0.229373	0.266376	0.752055	0.651535	0.640916	0.502304	0.293578	0.691111	1.00142	0.984925	1.16484	0.332487	0.473958	0.330166	0.503577	0.499165	0.487455	0.436338	0.292154	0.641577
CDK2-5	CDK2	x	0.821321	0.816587	1.28435	0.879032	0.716931	0.841184	0.562929	0.766061	0.7375	0.763988	0.787879	0.731643	0.940571	0.982036	1.29585	0.531447	0.965461	0.373096	0.823617	0.64441	0.769784	0.612527	0.635546	0.69426	0.294589	0.321508	0.350817	1.10939	0.9304	0.905009	0.721408	0.323864	0.501381	0.83224	0.721754	0.681894	0.583333	0.579268	0.624585	1.07263	0.509574	0.641153	0.763128	0.374468	0.599404
CDK2-6	CDK2	x	0.941029	0.738007	1.12483	1.09635	1.06977	1.01542	0.442886	0.862786	0.675172	1.06888	0.962221	1.23379	1.24719	0.940181	1.1088	0.375821	0.484311	0.586253	0.838164	1.04986	0.884154	0.860488	0.876299	0.981132	0.266277	0.247256	0.41635	0.852776	0.936951	0.787561	1.01408	1.1793	0.690341	0.664122	0.712242	0.765258	0.674855	0.832226	0.916159	0.875231	0.672711	0.662273	1.21349	0.629193	0.538715
CDK2-7	CDK2	x	0.204819	1.25128	0.875	0.768362	0.561856	0.573034	0.180769	0.247863	0.2375	0.852814	0.673729	0.762452	0.576419	0.348148	0.591716	0.448718	0.455056	0.154362	0.706522	0.619048	0.447205	0.761468	0.4	0.269841	0.0458015	0.0449102	0.12532	0.713287	0.603175	0.568966	0.485207	0.375	0.469697	0.606335	0.215569	0.496835	0.286585	0.342541	0.256944	0.828194	0.144033	0.323276	0.572687	0.0740741	0.288793
CDK2-8	CDK2	x	0.710843	0.914591	0.316176	0.603715	0.421603	0.867257	0.196796	0.168196	0.187342	0.528384	0.608924	0.497396	0.488189	0.484663	0.355872	0.477663	0.2	0.223496	0.776699	0.8	0.404669	0.24058	0.251592	0.390244	0.192192	0.210383	0.192529	0.201357	0.223881	0.282787	0.075	0.245098	0.603715	0.404922	0.484568	0.214953	0.383513	0.301471	0.223077	0.218905	0.122249	0.0796915	0.114428	0	0.066838
CDK2-9	CDK2	x	0.463855	1.7486	1.0904	0.924419	0.755556	1.18667	0.567164	0.803419	0.836364	1.44706	1.39749	1.13281	0.937143	0.769231	0.898649	0.963303	0.567568	0.568966	0.858896	0.794521	0.677966	0.818605	0.690909	0.62069	0.118182	0.205479	0.30597	0.93617	0.846395	1.01413	1.24167	0.985507	0.517857	0.584158	0.622568	0.817427	0.80597	0.823129	0.646617	0.85022	0.342342	0.433198	1.02203	0.36036	0.311741
CDK20-1	CDK20	x	1.32246	0.826255	1.9031	1.04472	0.982206	0.808271	1.20102	0.997183	1.04817	1.08852	1.26196	1.07765	1.66803	1.15116	1.03475	1.03673	1.36283	1.48341	1	0.768939	1.25217	1.50719	1.35077	1.34868	1.49852	1.92982	1.41956	0.935421	1.23241	1.36	0.794118	0.839858	0.672783	1.39077	1.0155	1.1986	1.37727	1.38272	1.48913	0.813333	0.710817	0.711172	0.98	1.00442	0.697548
CDK20-10	CDK20	x	0.793651	1.01049	1.04039	0.940063	1.06119	1.01307	0.874419	0.838453	0.867277	0.746611	1.07207	0.98497	0.881481	1.4613	1.19579	1.22917	1.02137	1.07081	1.4553	0.83913	1.2821	1.02394	0.729697	1.34008	0.936695	0.734055	0.931844	0.852967	0.971989	1.14829	1.11514	1.57329	1.24761	1.06301	1.17734	0.742424	1.18814	1.01475	1.17647	1.64251	1.23788	1.09459	1.62776	1.49493	1.37162
CDK20-11	CDK20	x	0.787986	1.06764	0.818923	1.16974	1.12195	0.957166	0.545984	1.14427	0.874543	0.81607	0.905263	0.955383	1.10201	1.30604	0.970874	1.17286	0.656442	0.802158	0.913201	0.889503	0.9375	0.717815	0.706134	0.849682	0.658342	0.884663	0.90113	0.92703	1.03648	1.06237	0.896887	1.2847	1.47145	0.947862	1.17153	0.819431	0.98	0.83368	1.03073	1.0563	0.813924	0.867876	1.01346	0.96962	0.778497
CDK20-2	CDK20	x	1.17107	0.66289	0.540682	1.03105	1.00779	0.9375	1.02641	1.19659	0.733624	1.07742	1.06363	0.817245	0.787013	0.894569	0.988873	1.44367	0.855978	1.28899	0.987826	1.25	1	0.634346	0.919654	0.897436	1.03019	0.871069	1.08248	1.31178	1.53478	1.04498	1.88925	1.24768	1.02883	0.91042	0.805219	1.10737	1.12012	1.21776	0.96355	0.854928	0.726987	1.10131	0.982281	0.958159	1.09477
CDK20-3	CDK20	x	1.01518	1.17149	1.19432	1	1.09034	1.13095	1.31278	1.41443	1.91039	1.19956	1.29353	1.24741	1.34	1.19592	1.26207	1.53659	1.5186	1.33879	1.6991	1.43208	1.238	1.15306	1.36076	1.39577	1.35127	1.76694	2.30428	1.13612	1.48985	1.05396	1.63333	1.10169	1.125	1.13043	1.48582	1.14143	1.74211	1.53684	1.75124	1.0306	1.10279	1.0619	0.954911	1.78397	1.29841
CDK20-4	CDK20	x	1.06705	0.895966	1.25659	1.17008	0.777132	1.18994	0.846278	0.960692	1.27184	1.4993	1.01442	1.19472	0.605223	0.83218	0.775338	1.14175	0.995726	1.20518	1.20079	1.0444	1.05743	0.955022	1.04518	1.03407	1.30994	1.15385	1.23436	0.838372	1.03178	1.12214	1.23711	1.45408	1.42581	0.958621	0.682041	1.38301	1.2402	1.11137	1.14687	1.60056	1.06944	0.863874	1.63827	0.641975	1.34424
CDK20-5	CDK20	x	1.0469	1.18129	0.653997	0.963612	0.939821	0.932026	1.32391	1.11382	0.974747	1.00814	1.14458	1.1208	0.805	0.941785	0.727062	1.07353	1.54193	1.36917	1.19486	1.162	1.20588	0.750719	0.929057	0.942387	0.929544	1.0959	1.04267	0.940984	1.00963	0.914153	1.02211	1.03166	0.943723	0.866611	0.974705	0.965338	1.0202	1.45298	1.36585	1.22338	0.845588	0.832117	1.36977	0.717437	0.826034
CDK20-6	CDK20	x	0.597156	0.552972	0.65808	0.874036	0.810096	0.973415	0.641026	0.684022	0.739623	1.09164	1.22906	0.83179	1.07595	1.03191	0.831858	0.632212	1	1.19506	0.845771	0.568878	1.03883	0.620278	0.534653	0.979911	0.792738	0.747283	1.71566	1.12448	1.22353	1.10043	1.36623	0.822857	1.22479	0.927492	0.799363	0.828737	0.684211	0.771831	0.653543	0.808511	1.13973	0.617997	1.00532	1.25084	0.646859
CDK20-7	CDK20	x	0.917391	0.826772	0.481343	0.715385	0.876106	0.721277	1.42561	0.663889	0.973435	0.810174	0.731302	0.806803	0.782427	0.569307	0.706931	0.734513	1.07746	0.956044	0.665179	0.723558	0.991379	0.806331	0.887125	0.822018	0.705972	1.20197	1.71589	1.17034	0.922164	0.85101	1.08559	0.728665	1.22388	0.785597	0.956344	1.21212	0.961814	1.08924	0.63311	0.8151	0.55969	0.526066	0.869029	0.381395	0.680885
CDK20-8	CDK20	x	1.70827	1.38268	1.71448	1.01104	0.981679	1.11194	1.46526	1.47895	1.44014	1.36772	1.29991	1.11225	0.742406	0.987547	0.974249	1.04308	1.03358	1.15906	1.45141	1.30135	1.39713	1.37344	1.53881	1.51528	1.96051	1.74972	1.06027	1.00079	1.02019	1.14663	1.56575	1.69193	1.3439	1.17709	0.980288	1.23252	1.33921	1.50081	1.61404	0.82438	1.13953	1.62758	0.788223	1.21537	1.9544
CDK20-9	CDK20	x	0.656805	1.22111	0.738676	0.99434	0.875195	0.964029	0.858247	0.868421	0.973427	0.997709	0.989324	0.881002	0.555855	0.963934	0.698941	0.985213	1.04702	0.892424	0.677419	0.668301	0.929515	0.839674	0.838946	0.944795	0.911483	1.08208	0.763968	0.846154	1.1046	0.927386	1.46777	0.729819	0.878095	1.25535	1.08645	0.882614	0.798148	0.965455	0.67002	0.864929	1.06934	1.20223	0.740521	1.44647	0.919107
CDK3-1	CDK3	x	1.01222	0.986928	1.03788	1.00248	1.08959	0.768539	1.0026	1.01969	0.997912	1.17638	1.28829	1.14225	0.996071	0.9329	1.63187	1.17039	0.736842	1.17978	1.00811	1.25067	1.06329	1.23985	0.933333	1.2495	1.02295	1.13826	1.02508	1.45016	1.3539	1.30333	0.51567	0.736527	0.947853	1.16761	1.10935	1.04416	1.31884	1.39091	1.44728	1.00211	1.47347	0.918004	1.61684	1.70204	0.823529
CDK3-10	CDK3	x	0.898734	0.87703	0.977143	1.03782	1.03024	0.857741	0.82149	0.734205	0.922662	0.780488	0.779337	0.957143	1.01758	0.976923	1.09524	0.765625	0.704545	0.80622	0.585062	0.77512	0.899743	0.962069	0.887987	0.757265	0.868012	0.604412	0.577011	0.790634	0.992826	1.02911	0.757303	0.621103	0.603491	1.2093	0.671765	1.23791	0.8425	0.976945	0.908356	0.993031	0.723866	1.25939	0.743902	0.477318	1.6136
CDK3-2	CDK3	x	0.805774	0.988201	0.808933	0.990741	0.859375	0.93913	0.809917	0.803704	0.8659	1.01625	0.614243	1.22337	0.641026	0.923848	0.78499	1.36524	0.664987	0.597855	0.759036	0.827014	0.578947	0.989601	0.783178	0.848592	0.846543	1.29094	0.81831	0.755072	0.930618	0.669528	0.413158	0.721675	1.14699	0.766839	0.779355	0.725904	0.6759	0.930233	0.538922	1.09962	0.984762	1.01446	0.557471	1.54095	1.38636
CDK3-3	CDK3	x	0.891403	1.2749	1.53535	1.20601	1.05769	1.33526	0.901575	1.58772	2.60435	1	1.35379	1.10256	1.30357	1.27962	0.812227	1.61364	2.05851	1.14163	1.25568	0.94958	2.08667	1.52697	0.949807	0.9631	1.27397	0.736	0.794304	1.3657	1.15486	1.5625	1.38498	1.17407	0.480198	0.926829	0.992021	1.53448	1.23834	1.06522	1.52083	1.18809	1.49135	0.928571	0.984326	1.11419	0.693452
CDK3-4	CDK3	x	1.12983	1.30322	1.04583	0.89019	0.942424	1.27441	1.28364	0.807829	0.904459	1.06631	1.11872	1.08648	0.933333	1.00924	1.13143	1.04587	1.05546	0.85044	0.675793	0.900787	0.874576	0.958486	1.20378	0.882075	1.42593	1.52876	0.734494	1.15513	0.989682	1.13648	0.723577	1.06633	1.77089	0.998956	0.759259	1.15126	1.01534	0.852679	1.01256	1.09308	0.83025	1.10785	1.142	0.915125	1.56858
CDK3-5	CDK3	x	0.791599	1.15194	1.22655	0.930599	1.29006	1.03042	0.553059	0.572327	0.395503	0.809317	0.934016	0.730208	1.14435	0.87384	0.654799	0.937605	0.860254	1.11478	0.708861	0.635478	0.806378	0.865915	0.745814	0.929279	0.669749	0.835616	0.80021	0.909188	1.08901	1.18721	1.61285	0.531365	0.853107	0.731183	0.884754	0.753024	0.678501	0.727799	0.802875	1.37443	1.27671	0.839142	1.25457	1.28443	1.12869
CDK3-6	CDK3	x	0.954416	1.20274	0.826531	0.924779	0.864826	0.908029	0.343029	0.551136	0.690852	0.69664	0.849156	0.756481	1.01858	0.629676	0.863144	1.24963	0.653897	1.08642	0.663421	0.756711	0.643266	0.889989	0.722388	0.984513	0.718679	1.0264	1.15107	0.822648	0.864887	0.839744	0.962482	0.541667	0.545333	0.877979	0.981928	1.0572	0.814941	0.781967	0.662037	1.05664	0.927451	1.05131	0.978214	0.832353	0.871204
CDK3-7	CDK3	x	0.9161	0.888889	0.995902	0.801603	1.21911	1.07539	0.782114	1.01017	0.660777	0.756233	1.0795	0.838663	0.867403	1.06715	0.824399	0.736287	0.964377	0.792453	1.44476	0.882114	0.985816	0.756055	0.789474	1.06908	0.56974	1.08653	1.50478	1.22695	0.957393	0.995979	0.969555	1.02804	0.875984	0.836218	0.932177	0.817352	1.2155	0.961853	1.1875	1.13076	1.05511	1.03571	1.18871	0.837925	1.0522
CDK3-8	CDK3	x	1.38433	0.755027	1.17958	0.962617	1.30201	1.18495	0.585106	0.651741	1.0366	0.886447	1.01928	1.13869	0.969283	0.791391	1.16632	1.04545	0.922261	1.35802	1.08282	1.16372	1.21041	1.02424	1.01488	0.966499	0.757911	1.04046	1.23345	1.02703	0.823227	1.18245	0.815842	1.04754	1.07358	0.972938	1.22537	1.05416	1.06629	0.937262	1.33787	1.29275	1.00705	1.27647	1.07798	1.08604	1.22206
CDK3-9	CDK3	x	1.44904	1.15888	0.868493	1.08245	1.27492	1.12329	1.10165	0.668213	0.980088	1.1625	1.20726	1.14425	1.34821	1.14545	1.31921	1.06069	0.89951	0.962312	0.758706	1.02564	1.32997	0.82774	0.978892	1.03846	0.783237	0.715768	0.49631	1.33624	1.16827	1.04522	0.918841	0.894886	1.02786	0.864815	0.777778	1.26984	1.04658	1.0184	1.00885	1.39309	1.66183	1.3949	1.16415	1.11826	2.09554
CDK4-1	CDK4	x	0.780804	0.497442	0.512195	0.566038	0.567797	0.526389	0.261094	0.547836	0.602957	0.704433	0.798211	0.730734	0.774347	0.867725	1.04778	0.377743	0.469357	0.647239	0.490876	0.669355	0.71453	0.752147	0.731613	0.728643	0.338634	0.154545	0.246691	0.650561	0.67629	0.834087	0.401325	0.156463	0.257596	0.533601	0.831992	0.760171	0.595944	0.41195	0.420635	0.927435	0.915438	0.932757	0.855865	0.764995	0.767531
CDK4-10	CDK4	x	0.550657	0.788419	0.589716	0.487882	0.450106	0.427673	0.485446	0.341723	0.542887	0.688179	0.646011	0.704978	0.878193	0.741483	0.763134	0.265604	0.289044	0.253835	0.617237	0.699001	0.669421	0.53913	0.519056	0.633399	0.27593	0.153625	0.119869	0.545788	0.508486	0.674667	0.272432	0.427928	0.299511	0.68759	0.682171	0.672026	0.562974	0.438875	0.432396	0.840764	1.03056	0.933211	0.805732	1.30136	0.977127
CDK4-2	CDK4	x	0.933048	0.744023	0.848889	0.543385	0.504687	0.503805	0.444206	0.675885	0.645695	0.920385	1.05468	1.09829	0.910097	1.03159	0.85628	0.252387	0.483245	0.307458	0.663894	0.933775	1.23123	0.74061	1.03686	0.907285	0.211634	0.143982	0.154987	0.649829	0.705537	0.753859	0.392	0.35408	0.123472	0.680233	0.952497	0.589416	0.579454	0.691693	0.738617	1.12485	1.13091	1.68844	1.06832	1.07371	2.64989
CDK4-3	CDK4	x	0.398977	0.861257	0.723724	0.445652	0.512064	0.628342	0.52381	0.669014	0.526667	0.815985	0.778325	0.978328	1.06444	1.05895	0.867704	0.905455	0.511976	0.277108	0.592287	0.581579	0.907738	0.832168	0.674274	0.980344	0.404762	0.230277	0.392157	0.868687	0.38206	0.753873	0.233803	1.13187	1.01974	0.764407	0.593193	0.668627	0.620553	0.641638	0.713178	0.981132	0.637708	0.721414	0.800839	0.597043	0.742204
CDK4-4	CDK4	x	1.7094	2.34123	1.20675	1.00816	1.00372	1.21839	1.0989	1.14835	1.43709	1.28465	1.01728	0.8	1.57561	1.43777	1.48014	3.93548	1.10088	0.890351	1.26953	1.63725	1.69118	1.29667	0.996904	1.21034	1.58255	2.47534	0.888535	0.901235	1.02134	1.31714	1.51304	0.641304	3.03571	1.19601	0.804223	1.74912	1.27363	1.33503	1.07538	1.34583	0.674194	1.39744	1.67083	0.76129	1.42949
CDK4-5	CDK4	x	1.79592	0.428571	0.555556	0.375	0.438596	1.02564	0.5	0.178571	0.531915	0.659341	0.703125	0.659574	1.04167	2.075	1.36585	0.193548	0.290909	0.155556	0.0408163	0.909091	0.938776	0.509434	0.603448	0.538462	0	0	0	1.98462	1.82192	0.857143	0	0	0.0508475	1.34783	8.875	1.32143	0.0731707	0.166667	0.289474	0.776596	0.315789	0.342857	1.97872	0.526316	1.4
CDK4-6	CDK4	x	0.393548	0.88959	0.76947	0.660606	0.491228	0.535117	0.856305	0.703704	0.377919	0.946667	0.744292	1.00398	1.17629	0.887324	0.919003	0.424603	0.427245	0.392996	0.616393	0.510448	0.886792	0.577295	1.08649	0.640669	0.0857788	0.07393	0.567164	0.849624	0.734918	0.727113	0.395954	0.373219	0.379205	0.693609	0.907363	0.639198	0.598566	0.801527	0.393082	0.911538	1.30661	0.75	1.04231	1.3006	0.839015
CDK4-7	CDK4	x	0.734973	0.691139	0.62341	0.507853	0.433908	0.628947	0.389873	0.21165	0.64191	0.486622	0.789981	0.644033	0.721393	1.14353	0.752336	0.505338	0.520147	0.431973	0.680451	0.441176	0.671779	0.933661	0.50995	0.750538	0.236504	0.184	0.19726	0.481908	0.433613	0.581679	0.445513	0.294944	0.836538	0.578838	0.52513	0.347887	0.450909	0.420561	0.602113	1.01518	0.64745	1.00281	0.561822	0.696231	2.1882
CDK4-8	CDK4	x	1.5468	1.25466	1.51075	1.15517	0.826733	0.597345	1.32836	1.2428	0.948148	0.917313	0.942693	1.12587	1.36686	1.3615	0.850575	0.822857	0.546341	0.863158	0.994872	0.779661	0.926829	1.19087	1.26582	1.25943	0.551515	0.525926	0.616766	1.0119	0.68	1.15385	0.340426	0.947619	0.658768	0.978659	1.01672	0.769857	1.1	1.0733	1.08125	1.34627	1.36719	1.46371	1.00597	0.9375	0.830645
CDK4-9	CDK4	x	0.86398	1.09976	0.907407	0.552273	0.795213	0.557484	0.45805	0.735099	0.685252	0.982201	1.11807	1.07455	1.96382	0.848049	0.875536	0.315136	0.238727	0.98708	0.892857	0.875648	1.01366	0.772477	0.904031	0.725191	0.0828402	0.349091	0.164966	0.474926	0.760479	0.748823	0.358543	0.74	0.148883	0.482602	0.498503	0.834848	0.555215	0.535014	0.442254	0.69391	0.859649	0.977186	0.798077	0.768421	1.23004
CDK5-1	CDK5	x	0.824847	1.1682	0.746102	1.10537	1.04845	0.919626	0.795231	1.14634	1.48901	1.11416	1.35377	1.073	1.25942	1.35072	0.988484	0.764563	0.88668	0.908434	1.16314	1.2959	1.12826	1.00148	1.10363	0.921474	0.646497	0.92378	1.06033	1.28958	1.39357	1.15211	0.985748	1.62353	0.74424	1.14637	1.44365	1.45114	0.973621	0.997585	1.05026	1.68998	1.00612	0.872699	1.04159	0.932722	0.946319
CDK5-10	CDK5	x	1.02618	1.81193	0.785388	1.1659	1.17204	0.944444	1.62222	0.774834	1.56148	0.79845	1.75709	1	0.804598	1.02899	0.694853	1.20408	0.808511	0.755435	1.3522	1.09545	1.38624	1.16667	0.858657	0.968182	0.50463	1.53091	0.342105	1.4313	1.19333	0.747826	1.14948	0.633136	1.35632	0.836364	1.3311	1.01434	0.945652	0.970238	0.873239	0.692308	1.51092	0.2125	1.24291	1.9083	0.308333
CDK5-11	CDK5	x	0.903794	1.1404	1.06233	1.19599	1.03664	1.04097	1.09122	1.20801	1.2002	1.52115	1.28216	0.952468	1.13793	1.17622	1.43724	1.04923	0.81882	0.723404	1.08436	1.05052	1.19479	1.21519	1.13857	1.01311	0.825086	0.942669	0.971368	1.02093	1.24557	1.08004	0.545317	0.483516	1.1311	1.32671	1.11742	0.979028	1.10218	1.03152	0.902244	1.26486	0.88708	1.1658	1.26703	1.29908	1.32013
CDK5-12	CDK5	x	1.39564	0.634328	0.624585	1.16667	1.22222	1.0081	1.14404	1.53388	1.18154	1.1247	0.826879	1.49235	1.33182	1.16387	1.18006	0.73871	0.778816	1.24113	1.20091	1.24291	1.09589	1.4083	1.00291	1.30422	1.11461	0.645946	2.19048	1.30303	1.16779	1.43299	1.17508	0.908163	1.74046	0.907216	1.10204	1.28499	0.614334	1.18631	1.14286	1.82723	1.94301	0.670616	1.59948	1.68135	0.71564
CDK5-13	CDK5	x	1.07971	0.855072	0.6	0.709459	0.569536	1.16364	0.741784	0.651685	0.555556	0.762626	0.956522	0.656652	0.630769	0.864	0.809524	0.450382	0.901639	0.429907	0.711538	0.787356	0.886228	0.921569	0.432161	0.879518	0.0798319	0.267241	0.448276	1.03721	1.05528	1.43077	0.597222	1.0102	1.05556	0.573034	0.9375	1.7732	0.704918	0.401639	0.688073	0.512987	0.896341	0.770408	0.915584	0.804878	0.591837
CDK5-14	CDK5	x	0.681452	0.834043	1.42336	1.1105	1.22864	1.05529	1.21269	1.65141	1.73673	1.12291	1.19193	1.34757	1.05809	1.26143	1.29694	1.35156	1.19037	1.1374	1.28918	1.41228	1.46348	1.26954	1.28639	1.23944	1.26129	1.2133	0.946488	1.25433	1.04676	1.08546	0.797468	1.26506	1.26577	0.888889	0.95935	0.875168	1.45455	0.90085	1.49239	1.23103	1.26345	1.03368	1.27586	1.0538	0.623158
CDK5-2	CDK5	x	0.852033	1.41283	1.25894	1.09774	1.16667	1.2607	1.05183	1.28153	1.23118	1.23904	1.38628	1.10044	1.33581	0.966074	1.25671	0.824645	0.860075	0.669935	1.21456	1.22757	1.26506	1.44656	1.40292	0.977865	1.13564	1.14066	1.19712	1.05325	1.27526	1.15829	0.581876	1.185	0.831239	1.33908	1.15541	1.13895	1.01566	1	0.931227	1.05018	1.19149	1.35115	1.47613	1.10638	2.07379
CDK5-3	CDK5	x	1.23711	0.991736	0.636697	1.29909	1.0794	0.967146	1.01803	1.1405	1.24647	1.39933	1.24187	1.02131	0.678683	0.85567	0.660177	0.553911	0.804762	0.840807	1.28401	1.24879	1.26055	1.0203	0.809595	1.15978	1.32833	0.355311	0.668203	0.97526	1.05425	1.17186	0.560976	1.92325	0.859244	0.973099	0.87931	1.28981	1.18434	1.06176	1.00233	1.18528	0.95814	1.25275	1.09772	0.697674	1.15385
CDK5-4	CDK5	x	1.05731	1.35545	1.17267	0.893713	1.0299	0.917329	1.36142	1.24399	1.19444	1.00543	1.05091	1.01976	0.964706	1.01682	0.825939	0.737557	0.911565	1.04223	0.980836	0.769097	0.945794	1.06298	0.75908	0.807125	0.5133	0.543774	1.04579	1.00382	1.20214	1.2232	1.29613	1.34107	0.732704	0.717831	0.986373	1.21281	0.816265	1.01773	0.895105	0.536431	1.16157	1.12111	0.590285	1.38755	1.42765
CDK5-5	CDK5	x	1.22259	1.04573	0.726923	0.915129	1.2963	1.16049	1.40854	1.05435	1.53221	1.69343	0.682648	1.07731	1.61066	1.58537	1.57527	1.32028	0.615385	0.934256	1.28462	1.03101	1.12446	1.38732	1.53425	1.34797	1.68957	1.2064	0.945017	1.29274	0.9413	1.35835	1.24585	0.856287	0.576052	1.22291	1.52198	1.38095	1.625	1.70417	1.82488	1.76807	1.1517	1.01553	2.23795	1.76161	1.10559
CDK5-6	CDK5	x	0.822973	0.651786	1.5083	1.2249	0.960887	1.13754	1.14925	0.730088	1.32587	1.00814	1.04848	0.993013	1.06209	0.758947	1.05007	0.89916	0.674797	0.79844	0.977578	1.07155	1.08319	0.910053	0.883803	0.875	0.326228	0.847826	0.428164	1.18251	1.22789	1.36697	1.15805	1.01767	0.944979	1.06071	1.22732	0.908068	0.841642	0.956325	1.10725	1.22769	0.491935	0.878759	1.35812	0.59879	0.713346
CDK5-7	CDK5	x	1.83077	1.85887	0.931298	0.932927	1.17508	1.27381	1.23708	2.18857	2.19461	1.32805	1.39706	1.42275	1.07119	1.34796	1.66221	0.822064	1.10544	1.43725	1.41577	1.40486	1.37061	1.03819	1.13198	1.30159	1.47836	2.11699	0.869863	0.835498	1.22169	1.17361	0.798283	2.41304	1.76147	1.086	1.05143	1.4631	0.98062	1.20259	1.26364	0.785366	1.01724	1.7299	1.12195	1.02759	1.3537
CDK5-8	CDK5	x	1.43936	1.21018	1.23726	1.07375	1.01202	0.969631	1.03222	1.52355	1.5151	1.35312	1.10064	1.4576	1.28022	1.30162	0.854331	1.05838	1.25553	1.25155	1.06154	1.56264	1.21179	1.10675	1.28594	1.2569	1.49831	1.32475	1.55678	1.1211	1.18844	1.16647	1.85806	1.30705	1.91038	1.20112	1.19655	1.26008	1.49235	1.33827	1.50667	2.06267	1.19456	0.632184	2.38147	1.27347	1.04023
CDK5-9	CDK5	x	1.67598	0.848639	1.53261	0.780455	0.869198	0.856346	1.25	0.893475	1.07778	1.31546	1.05794	0.977202	1	0.948035	0.822819	0.814679	0.518797	0.577603	1.01274	1.04252	0.663526	0.686636	0.93742	0.816441	0.651422	0.42735	0.626364	0.963218	0.947732	0.898324	0.62089	1.49035	1.28902	1.04069	1.03563	1.03497	0.918447	0.907328	0.8861	1.17962	0.669182	0.717073	1.05362	0.783648	0.793902
CDK6-1	CDK6	x	0.586121	0.777626	0.521127	0.825032	0.798837	0.712826	0.756381	0.639269	0.586	0.588054	0.344775	0.5765	0.65798	0.683146	0.76824	0.816298	1.06789	1.14366	0.724311	0.717521	0.751472	0.270941	0.278622	0.231237	0.793597	0.646237	0.793103	0.864362	0.818045	0.785225	0.825737	0.878672	0.690033	0.448727	0.480848	0.585223	0.748397	0.681097	0.747788	1.03109	0.635762	0.531368	0.711572	0.594134	0.479214
CDK6-10	CDK6	x	0.728571	0.693122	0.49866	0.851852	0.964286	0.78043	0.501182	0.53913	0.438413	0.267894	0.366733	0.630303	1.14876	0.69161	0.429293	0.929054	1.09846	1	0.606232	0.874194	1.25532	0.265589	0.329646	0.413158	0.617582	0.326034	0.825503	0.563327	0.599665	0.715064	0.686007	0.681564	0.386282	0.674797	0.510319	0.736148	0.736264	0.664615	0.498525	0.408922	0.828924	0.905155	0.289963	0.693122	0.752577
CDK6-2	CDK6	x	0.623256	0.798319	0.811133	0.844063	1.01788	1.1147	0.981105	0.482353	0.742675	0.412685	0.594595	0.556962	1.00667	1.19396	0.844101	1.10376	0.953488	1.19128	0.827411	1.03636	0.892384	0.52934	0.611043	0.486601	1.14748	1.13145	0.724806	0.857459	0.973404	0.7154	0.911076	1.24865	0.523349	0.61791	0.724472	0.747788	1.18962	1.00428	0.974545	1.80256	0.651036	0.786156	2.01278	0.697928	1.04326
CDK6-3	CDK6	x	0.861233	0.888889	1.50833	1.36139	1.0425	1.1028	1.13355	1.30784	0.978041	0.946782	1.10647	0.854571	1.41944	1.77458	1.18794	1.20675	1.28947	1.09069	1.21204	1.22833	1.24533	1.26718	1.19843	1.08998	1.89381	0.968284	0.55095	1.17067	1.22775	0.997406	0.947368	1.63274	1.01256	0.864641	1.33514	0.867809	1.05251	1.05528	0.952909	1.31207	1.75749	1.28115	1.90345	1.35329	1.34984
CDK6-4	CDK6	x	0.107345	0.0710059	0.302326	0.739726	0.563218	0.587209	0.232558	0.307377	0.371287	0.309645	0.14652	0.540284	0.352601	0.527132	0.578947	0.4	1.2906	0.737179	0.329268	0.431507	0.277778	0.172973	0.177515	0.09375	0.159574	0.258687	0.0533981	0.752852	0.490421	0.671378	0.601562	0.26087	0.958904	0.384342	0.59447	0.292576	0.472868	0.824	0.246032	0.306034	0.473171	0.254237	0.25431	0.292683	0.0960452
CDK6-5	CDK6	x	0.560086	0.53144	0.382692	0.68913	0.620225	0.5625	0.489533	0.34127	0.721724	0.415584	0.326023	0.533662	0.729124	0.620915	0.535073	1.13043	0.697368	0.6	0.376168	0.73297	0.488	0.261538	0.231518	0.343137	0.482085	0.46461	0.391781	0.866187	0.604113	0.621871	0.405405	0.759791	0.545455	0.444887	0.468013	0.438356	0.376884	0.573333	0.267442	0.745192	0.81454	0.722304	0.751603	0.716617	0.511078
CDK6-6	CDK6	x	0.439169	0.789474	0.626582	1.0493	1.0084	0.803922	0.531856	0.79646	0.899666	0.510204	0.582456	0.580925	0.733788	0.665236	0.552716	0.757576	1.09253	0.963636	0.586364	0.700565	0.898305	0.57971	0.458182	0.398406	0.789157	0.928571	0.472603	0.924812	0.910913	0.56699	0.872414	1.00687	0.641791	0.401425	1.12059	0.447619	0.921348	0.688995	1.07563	1.04826	0.390428	0.601246	0.726542	0.675063	0.576324
CDK6-7	CDK6	x	0.712766	0.91092	0.656757	0.883295	0.731935	0.79638	0.481818	0.330275	0.444706	0.592593	0.593458	0.45904	0.843891	1.00948	0.71256	1.07823	1.05751	0.840116	0.649457	0.80315	0.720317	0.373444	0.219178	0.338902	0.283394	1.09367	0.726899	0.743316	0.986641	0.576531	0.951149	0.431267	0.850318	0.927451	0.961905	0.678322	0.9	0.783688	0.955479	0.217918	0.605058	0.355752	0.280872	0.729572	0.270796
CDK6-8	CDK6	x	1.15902	1.58824	1.28235	1.13268	1.01626	1.2931	1.11159	1.33411	2.16883	1.4563	1.29362	1.36041	1.19759	1.625	1.20238	1.26686	1.24221	1.13499	1.61594	1.37468	1.39037	1.32009	1.44906	1.72637	1.23188	1.13861	1.12146	0.80363	0.872937	1.39484	1.5163	1.42154	1.55457	1.43281	1.15665	1.01997	1.55102	1.85424	1.93515	0.9511	1.56823	1.49153	1.05623	1.19687	1.18432
CDK6-9	CDK6	x	0.414184	0.477795	0.623413	0.75	0.948598	0.866154	0.632822	0.714122	0.795943	0.331601	0.295681	0.365702	1.00158	0.921011	0.684337	1.25811	0.8594	0.775806	0.753754	0.59276	0.862986	0.106095	0.24933	0.155235	0.890585	0.853723	0.905697	0.706274	0.786856	0.789836	0.756716	0.650142	0.832258	0.688649	0.755047	0.762615	0.788026	0.809359	0.784965	0.749149	0.46172	0.57047	0.628831	0.381625	0.400447
CDK7-1	CDK7	x	1.04886	0.508475	0.563758	0.621212	0.59661	0.546624	0.72549	0.414392	0.887781	0.604377	0.444023	0.446894	0.356808	0.720779	0.679054	0.452703	0.557994	0.607143	0.657143	0.616327	0.758621	0.614396	0.547126	0.632653	1.0023	0.40813	0.549898	0.519833	0.337232	0.503876	0.558559	0.752542	0.220217	0.663327	0.375465	0.459649	0.473856	0.581315	0.408451	0.768627	0.327586	0.750524	1.18627	0.219212	0.27044
CDK7-10	CDK7	x	0.271605	0.439462	0.165854	0.493333	0.730594	0.518135	0.20679	0.376374	0.33913	0.426966	0.302932	0.647887	0.103627	0.0942408	0.133333	0.118182	0.158273	0.25	0.108696	0.263158	0.204762	0.373585	0.243446	0.33195	0.310204	0.189024	0.22973	0.754717	0.731214	0.577836	0.885714	0.163462	1.2359	0.278997	0.234568	0.195584	0.0680628	0.0536585	0.0588235	0.281139	0.59	0.329861	0.0996441	0.526667	0.434028
CDK7-2	CDK7	x	0.394286	0.823684	0.952096	0.800959	0.985119	1.03963	0.611222	1.0533	0.720157	1.05031	0.885714	1.02846	0.92623	0.98	0.668269	0.697479	0.684211	0.755162	1.54882	1.10443	0.972727	1.02455	0.683258	1.0558	0.20283	0.125551	0.53271	1.15532	0.847154	0.912127	1.34884	0.952077	0.706745	1.02658	0.878846	0.761017	0.665605	0.667774	0.832215	0.90287	1.24064	1.02257	1.40839	1.13904	0.839729
CDK7-3	CDK7	x	0.0879121	0.0957265	0.101777	0.457333	0.411451	0.466216	0.0495553	0.0127877	0.130137	0.134791	0.113553	0.124567	0.152828	0.109043	0.201711	0.372583	0.0904348	0.0757576	0.143713	0.07	0.0652778	0.191489	0.139111	0.121453	0.056	0.0270035	0.074215	0.254813	0.353556	0.35274	0.152239	0.237736	0.0300546	0.138941	0.267722	0.252665	0.0731707	0.123506	0.0552268	0.183417	0.15875	0.222646	0.247487	0.09875	0.339695
CDK7-4	CDK7	x	0.955446	0.859649	0.90625	1.09302	0.858407	1.15569	0.959569	0.905537	0.631769	0.986885	0.793103	0.634409	1.23246	0.881148	1.235	0.930556	0.413194	0.759358	0.954315	0.640693	0.988439	0.967532	1.41485	0.847896	0.211454	0.27907	0.46	0.947059	1.07429	1.11899	0.558442	0.570248	1.25581	1.0721	0.917949	0.738676	1.03061	0.807107	0.606481	1.24412	1.10154	0.487544	0.891176	0.710769	0.782918
CDK7-5	CDK7	x	1.29128	0.878049	1.12388	1.26027	1.27323	1.16667	1.30824	1.00543	0.947368	1.05509	0.923503	0.71549	1.22203	1.03662	1.02138	0.994585	0.813688	0.755594	1.02301	1.02582	1.14418	0.962716	1.21566	1.10638	0.528061	0.261252	0.816165	1.06804	1.14844	0.934928	0.601626	1.08015	0.891589	0.791132	0.928922	0.752674	0.794872	0.93032	0.846591	0.788578	1.32415	1.35561	0.63791	1.3832	1.26337
CDK7-6	CDK7	x	0.862647	0.467427	1.03711	1.06917	0.980519	0.839286	0.882438	0.580645	0.840878	0.754219	1.04232	0.978161	1.12132	0.962843	0.976115	0.570952	0.556837	0.7344	0.83004	0.700193	0.794393	1.20347	0.871728	0.924832	0.255373	0.462197	0.416887	1.05853	0.76618	0.972574	0.643123	0.848083	0.702011	0.845974	0.639469	0.730363	0.678279	0.388031	0.729045	0.780785	0.794007	0.783274	0.657645	0.825218	0.681979
CDK7-7	CDK7	x	0.327189	0.84322	1.06195	0.887931	0.977358	1.1037	0.812	0.322034	0.981191	0.991071	0.936795	0.947791	0.935714	1.05096	1.04154	0.612245	0.411321	0.474138	0.707692	0.778226	0.559387	0.39196	0.524038	0.858667	0.376812	0.540741	0.383838	0.771255	0.902655	1.0801	0.427928	0.796296	0.573394	0.945559	0.744035	0.632184	0.421525	0.78327	0.714844	0.645833	0.665761	0.84131	0.77381	0.798913	0.36272
CDK7-8	CDK7	x	0.435841	0.381963	0.485149	0.455487	0.448498	0.654762	0.396825	0.453376	0.498294	0.350592	0.30292	0.342318	0.307116	0.268687	0.401887	0.530769	0.441109	0.357309	0.218543	0.354749	0.327635	0.438306	0.478778	0.366013	0.559541	0.491393	0.447427	0.741883	0.723701	0.44709	0.546117	0.778037	0.56867	0.326816	0.398788	0.435331	0.368876	0.298387	0.396226	0.538168	0.545455	0.23493	0.540076	0.404453	0.190108
CDK7-9	CDK7	x	0.490566	0.694785	0.528467	0.901454	0.873984	0.929878	0.510689	0.47469	0.383634	0.525376	0.776459	0.479817	0.669151	0.654854	0.662316	0.385109	0.475317	0.385694	0.541237	0.657088	0.571659	0.635	0.676611	0.554245	0.539526	0.47066	0.456597	0.785476	0.989176	0.808824	0.545082	0.297158	0.564692	0.63662	0.749759	0.753102	0.427419	0.455099	0.548061	0.623784	1.01538	0.942708	0.501622	0.857988	0.525
CDK8-1	CDK8	x	0.958333	1.07489	0.644689	1.06222	0.91498	0.991837	0.966216	2.28272	1.31471	1.19453	1.10602	0.843137	0.677551	1.15135	1.02174	0.553191	0.984848	0.921811	1.21019	0.651515	0.554348	0.757576	0.721154	0.784314	2.11818	1.47482	1.66182	0.585082	0.552311	0.689744	0.446215	0.600649	0.958647	0.852868	1.29179	0.862534	0.759825	0.782051	0.902344	0.969274	0.790323	1.51771	1.15084	0.895161	2.13079
CDK8-10	CDK8	x	1.37587	0.945946	2.17763	1.125	0.98998	1.00412	0.892548	0.307557	1.16284	1.0571	1.26401	1.09091	0.86819	1.03774	1.29672	0.440162	0.658065	0.48583	1.17209	0.685393	0.770297	0.691057	0.557878	0.725898	0.955263	1.38367	1.92146	0.504087	0.591398	0.627939	0.259524	0.815041	0.76618	1.22472	1.30674	0.991643	0.772487	0.733333	1.0099	1.01659	1.62749	1.19527	0.933635	2.40325	1.19527
CDK8-2	CDK8	x	0.474662	0.961722	1.08102	0.611336	0.576596	0.758621	0.52073	0.403756	0.403202	1.1116	1.06502	0.770588	1.04773	0.805556	0.942928	0.330097	0.359031	0.428899	0.701878	0.692308	0.9683	0.410488	0.364662	0.469725	1.76198	1.76809	1.31081	0.296961	0.262258	0.364474	0.129584	0.209581	0.345178	0.873961	0.763127	0.691589	0.748869	1.01036	0.751825	1.25766	0.688822	0.576923	1.33874	0.835347	0.475524
CDK8-3	CDK8	x	0.639118	1.14454	0.793985	1.00464	1.12456	0.856693	1.02789	0.700117	0.795455	1.26236	0.982564	1.13417	1.1234	1.5913	1.11096	0.641892	0.776632	0.770393	0.982487	0.82391	0.981513	0.907112	1.07061	0.982094	0.847302	0.947799	0.863208	0.908218	0.866062	0.942727	0.920943	1.27353	1.17059	1.18281	1.06998	1.00222	0.98513	0.963636	0.874558	0.906722	1.25228	0.803513	1.05075	1.14564	0.769484
CDK8-4	CDK8	x	1.329	1.08043	1.18306	0.6917	0.827655	0.84981	0.577491	0.846652	0.811092	0.866868	0.972337	0.726859	0.912863	1.42328	0.957547	0.364078	0.460976	0.654788	1.23077	0.906921	1.54573	0.466786	0.291022	0.558069	1.58452	2.11895	1.57003	0.600306	0.421922	0.643165	0.547393	0.715789	0.286957	0.983193	0.848558	0.977444	1.03186	1.08333	1.03059	1.20975	1.12336	1.62591	1.18907	1.09346	1.90693
CDK8-5	CDK8	x	1.35169	1.13889	1.38156	1.04267	0.975327	0.948424	0.945863	1.09101	0.56396	1.15992	1.09047	1.11964	1.11367	1.03193	1.01915	0.654062	0.597953	0.598726	0.941083	0.954114	1.24055	0.615385	0.587216	0.542926	1.4455	1.99771	1.55275	0.497418	0.636284	0.493289	0.368785	0.254317	0.668883	1.31621	0.882613	0.969534	1.09076	0.976077	0.839063	1.21315	0.974576	1.27348	0.884287	1.10699	1.05826
CDK8-6	CDK8	x	0.555256	0.636888	0.530435	0.930029	0.84456	0.6082	0.546371	0.673684	0.679592	0.925703	0.817343	0.879562	1.0457	0.807588	1.25269	0.159763	0.317919	0.524116	0.600559	0.661017	0.647815	0.309474	0.512104	0.44375	1.53472	1.7561	0.861338	0.254967	0.182812	0.385338	0.119863	0.108553	0.610169	1.09291	1.03893	1.36973	0.849462	0.992647	0.783862	1.08083	1.12959	0.798839	1.42956	1.59611	0.83559
CDK8-7	CDK8	x	1.08402	1.09854	1.04152	0.944218	0.918075	0.884	0.623085	0.771513	0.692754	0.921405	0.979424	1.0477	1.11471	1.05478	1.01765	0.609618	0.482051	0.50194	0.633103	0.865014	1.03396	0.511699	0.757981	0.517387	1.26942	1.37	1.26679	0.460184	0.381895	0.471683	0.703013	0.599028	0.42449	0.962963	0.93239	1.03815	0.753582	0.705202	0.813636	0.904594	0.856574	1.0173	0.968198	0.61255	1.25952
CDK8-8	CDK8	x	1.23645	1.07277	0.679157	0.952915	0.891945	0.850775	0.832016	0.425	0.86907	0.970628	0.96189	0.959792	0.989011	1.01964	1.19196	0.362963	0.384615	0.619289	0.579323	0.568085	0.70913	0.562404	0.47411	0.594554	1.24375	1.45029	1.00474	0.614534	0.410219	0.442834	1.19093	0.283293	0.751807	1.13013	0.795017	1.03836	0.973451	0.778393	0.80814	0.84639	1.51894	1.38783	1.60215	1.33712	1.44487
CDK8-9	CDK8	x	1.50751	1.22346	1.20596	1.07625	1.25926	1.1261	1.05385	1.09069	1.19617	1.57621	1.29771	0.913108	1.17991	1.52564	0.80198	0.808756	1.45912	0.647222	1.66555	0.863049	1.02091	0.674858	0.995726	0.952891	0.874429	1.18605	1.33333	1.29281	1.29946	0.991087	0.76087	1.26346	1.37578	1.30902	0.912442	1.35452	1.53846	1.10061	1.25402	1.49272	0.874263	1.19531	1.01663	0.774067	1.01367
CDK9-1	CDK9	x	0.527431	0.556242	0.741935	0.733429	0.700987	0.712034	0.645482	0.33821	0.564074	0.566984	0.427256	0.628396	0.487059	0.67402	0.677069	0.395349	0.569353	0.366032	0.450072	0.742754	0.628531	0.665615	0.640777	0.647443	0.499499	0.266406	0.425384	0.775081	0.802994	0.723779	0.453858	0.699865	0.766369	0.817833	0.774766	0.648308	0.429467	0.48605	0.515994	0.603113	0.596311	0.377375	0.576848	0.682377	0.351468
CDK9-10	CDK9	x	0.245981	0.830479	0.3267	0.502814	0.539967	0.502732	0.417027	0.418203	0.423381	0.354399	0.295249	0.421477	0.355623	0.372852	0.432387	0.408163	0.253731	0.33211	0.268412	0.447368	0.317073	0.372368	0.528517	0.632102	0.207158	0.413081	0.300112	0.502538	0.450433	0.792056	1.01676	0.285298	0.584211	0.536496	0.514031	0.360885	0.216912	0.326403	0.344106	0.588535	0.623272	0.490128	0.452229	0.548387	0.578397
CDK9-2	CDK9	x	0.101124	0.425926	0.5	0.536364	1.07778	0.791667	0.656388	0.185841	0.198251	0.34382	0.373913	0.2	0.795139	0.74359	0.780645	0.0970464	0.0127119	0.20202	0.608466	0.593284	0.553506	0.431325	0.839744	0.535256	0.0669014	0.0267559	0.034965	0.903465	0.943925	0.651852	0.327586	0.0386266	0.471111	0.435146	0.698953	0.43379	0.139423	0.390863	0.0840708	0.885802	0.723022	0.5225	0.854938	0.816547	0.4925
CDK9-3	CDK9	x	0.238768	0.239414	0.286525	0.633997	0.336648	0.549536	0.23991	0.339326	0.241419	0.240347	0.242664	0.171456	0.271589	0.327824	0.220588	0.139496	0.156433	0.180807	0.299257	0.204819	0.358595	0.198254	0.320819	0.315429	0.164706	0.184564	0.396825	0.452936	0.655576	0.624442	0.459283	0.340877	0.427663	0.309544	0.253444	0.255556	0.313589	0.222028	0.225092	0.422194	0.564865	0.174065	0.594388	0.545946	0.178738
CDK9-4	CDK9	x	0.695652	0.561966	0.589792	1.09761	0.991111	1.02582	0.651376	0.288927	0.666126	0.358372	0.458824	0.370529	0.817427	0.701754	0.640138	0.269504	0.420502	0.579677	0.701124	0.709382	0.64877	0.929674	0.922414	0.579193	0.103806	0.0477064	0.144737	0.86119	0.760265	0.800853	0.326203	0.692469	0.386318	0.490647	0.613312	0.491299	0.0957684	0.305714	0.220721	0.83612	1.34111	1.14218	0.908027	1.1526	0.879937
CDK9-5	CDK9	x	0.483501	0.416667	0.632826	0.884354	0.892548	1.00166	0.509677	0.628402	0.668975	0.570652	0.566667	0.554745	1.05464	0.861465	1.04234	0.571906	0.58679	0.47678	0.937622	0.780822	0.769097	0.902736	0.819912	1.06935	0.452645	0.596958	0.40303	0.811931	1.11453	0.965661	0.503458	0.572755	0.612167	0.876887	1.20235	0.973684	0.365815	0.316054	0.405975	0.99139	1.15843	0.788484	1.06765	1.26489	0.529965
CDK9-6	CDK9	x	0.41629	0.466667	0.555831	0.646651	0.682875	0.564356	0.144708	0.343525	0.60334	0.383289	0.421365	0.422559	0.374784	0.13986	0.386313	0.293629	0.358333	0.315136	0.42716	0.52	0.376777	0.464957	0.315603	0.648995	0.204403	0.207018	0.10832	0.908612	0.725926	0.723647	0.145729	0.297619	0.82622	0.534508	0.420375	0.403112	0.424051	0.442577	0.396501	0.287695	0.335807	0.659813	0.40208	0.29128	0.792523
CDK9-7	CDK9	x	0.439433	0.449749	0.509069	0.880448	0.813983	0.717675	0.463576	0.607925	0.493136	0.454163	0.353955	0.408753	0.662857	0.581395	0.525571	0.645408	0.397436	0.288889	0.650552	0.646794	0.58094	0.977131	0.741903	0.586006	0.391079	0.533561	0.646707	0.88212	0.869173	0.805904	0.565367	0.525333	0.649146	0.725908	0.715664	0.680356	0.235795	0.281915	0.306717	0.98622	0.416757	0.828377	1.05906	0.447225	0.714528
CDK9-8	CDK9	x	1.1261	0.995536	0.661041	1.10535	0.890578	1.09179	0.907063	1.14963	0.878885	0.856348	0.920412	0.935515	0.803526	0.934402	0.787795	0.925262	1.01329	0.868098	1.25896	1.17003	1.09444	1.17542	1.2327	0.844048	0.702703	0.774461	0.389463	1.17701	1.13153	1.17745	0.576667	0.481928	0.452035	0.914578	0.824442	1.42057	0.599309	0.700658	0.809135	0.835346	1.17146	0.98861	1.01647	0.767386	0.800683
CDK9-9	CDK9	x	0.232346	0.328063	0.374005	0.527578	0.482252	0.598456	0.231057	0.397875	0.325866	0.387803	0.286432	0.292627	0.56646	0.486857	0.491546	0.0940526	0.124246	0.188679	0.400281	0.441176	0.479042	0.473341	0.498396	0.54902	0.360129	0.371985	0.512019	0.511876	0.740627	0.735175	0.259366	0.176697	0.217333	0.446825	0.672023	0.435763	0.150611	0.2	0.143466	0.206674	0.359601	0.223867	0.245425	0.15308	0.113784
CDKL1-1	CDKL1	x	1.05594	0.974414	0.486957	1.17486	1.00907	0.863636	1.06107	0.753647	1.00482	0.834586	1.11994	1.10517	0.63786	1.41361	1.04907	0.984581	0.797495	0.97479	0.883117	0.956627	0.727488	0.98579	1.224	1.08824	1.21037	1.05445	1.50765	0.612903	1.29583	0.997386	1.09456	0.732057	0.815195	0.898462	0.80446	0.826645	1.059	0.697561	0.932976	0.511962	1.17992	1.02132	0.752791	1.39015	1.14712
CDKL1-10	CDKL1	x	0.450151	0.75942	0.888889	0.93808	0.67624	0.903537	0.988636	0.622785	1.61728	1.01426	0.909091	0.978131	0.773256	0.882166	0.390879	0.820611	0.888502	1.15415	0.761246	1.03191	1.0155	0.960557	0.860789	0.680387	0.751678	0.688312	1.00539	1.20659	1.05785	1.37712	0.391304	1	1.58876	1.19624	1.37463	0.667233	1.22605	0.869048	0.943723	1.26781	0.548872	0.862974	0.673219	0.684211	0.594752
CDKL1-2	CDKL1	x	0.425	0.613861	0.142857	1.11215	0.919463	0.87069	1.02632	1.08485	1.20382	0.459677	0.9	1.40556	1.01205	0.584416	1.15842	0.730496	0.987342	0.298969	0.86747	0.514286	0.541176	1.0125	1.41447	1.30435	0.780952	2.4086	2.03604	1.08929	0.487952	1.67974	1.56122	0.752577	0.92	0.962264	0.79798	0.957447	0.444444	0.449541	0.40708	1.10563	2.09211	1.63043	1.59155	3.83553	0.836957
CDKL1-3	CDKL1	x	0.901031	1.58824	1.42355	1.0984	1.06444	1.11165	1.09631	1.13145	0.72546	1.32928	1.04769	1.32803	0.933464	0.799544	0.614256	1.11623	0.894094	1.06322	1.20106	1.30137	1.06218	1.14911	1.09497	0.955908	1.05825	1.30041	1.82065	1.1736	1.11925	1.28279	1.13645	1.41568	0.863544	1.03577	1.09893	1.19709	1.01733	0.940898	1.00946	1.12568	1.33706	0.602305	0.780055	1.34824	0.657061
CDKL1-4	CDKL1	x	1.24684	0.594118	0.941606	1.28462	1.20548	0.826531	0.409091	0.819588	1.35979	1.08458	0.765101	1.3972	0.538043	0.907609	0.92891	1.40288	0.576471	1.12903	0.746114	1.50794	0.444444	0.886179	1.08122	0.73	0.690058	0.644689	0.588652	1.25229	1.01435	0.810997	0.863636	1.38158	1.88652	1.08716	0.680135	0.752336	0.704225	1.18182	1.15942	1.03614	0.68599	1.41935	1.59639	0.801932	0.860215
CDKL1-5	CDKL1	x	0.817778	1.0528	0.797872	1.16295	0.980422	1.0463	0.792812	0.884024	0.868298	1.00105	0.91778	0.875136	1.07267	1.06032	1.03372	0.981636	1.07718	1.12537	0.743827	0.841216	0.973231	0.996471	0.691525	1.0765	0.74922	1.28571	1.76012	0.855059	1.29234	0.776294	1.23242	1.08859	1.63387	0.982	1.16145	0.995666	0.846543	1.0798	0.5625	0.750258	1.54394	1.43521	0.891641	1.01891	1.4401
CDKL1-6	CDKL1	x	1.59041	0.826855	1.55506	1.18047	1.07157	1.3508	1.37599	1.33151	1.63994	1.36654	1.11838	1.44756	1.18669	1.222	1.4335	1.49407	1.05975	1.09644	1.73995	1.70803	1.46581	1.38855	1.70921	1.47966	1.39623	1.54207	1.92138	1.26453	1.24623	1.08362	1.7981	1.11203	0.996198	1.08866	1.26645	1.07468	1.34259	1.49041	1.75221	1.24627	0.915978	1.50725	1.35224	1.12397	1.38325
CDKL1-7	CDKL1	x	0.516667	1.12183	0.978261	0.852941	0.903084	1.10811	1.26087	0.516908	1.05856	0.904153	1.0127	0.815427	0.601942	0.747368	0.367089	1.49359	1.74306	0.375	0.933333	0.709804	0.595506	0.839695	1.02888	1.05172	1.46512	1.15964	0.897764	1.15702	1.05226	0.909747	1.72189	1.74251	0.907692	1.56154	0.72434	1.01042	0.671533	0.841727	0.597701	1.7485	0.767717	1.01058	1.52695	1.09449	1.4709
CDKL1-8	CDKL1	x	0.827004	1.01132	1.74658	1.59391	0.941423	1.18908	1.12798	1.05828	0.68984	1.59928	1.01948	1.30851	1.35648	0.716667	0.885135	1.22789	1.375	1.251	1.89071	0.963768	1.37895	1.14433	0.943038	1.02041	0.831126	0.46875	1.04564	1.0283	0.962779	1.87293	0.490826	1.12602	0.786477	1.2	0.819549	0.950464	1.07787	0.961538	0.564444	0.583333	1.65607	0.896373	0.713889	1.27168	0.810881
CDKL1-9	CDKL1	x	1.13521	1	1.13688	0.905363	0.860724	0.906977	0.636364	1.10513	1.00456	1.06944	0.835317	1.12989	0.8	0.597052	0.880435	1.16517	1.5045	1.00588	1.22436	1.53226	1.21284	1.10283	0.764977	1.13659	1.30233	1.2039	1.25882	1.19601	1.16964	1.21891	1.1963	0.923529	0.69281	0.897345	0.724	0.798061	1.00909	1.09053	0.964912	1.39953	1.25962	1.12752	1.63593	0.605769	1
CDKL2-1	CDKL2	x	1.93056	0.357895	0.487805	1.11224	1.53409	1.08257	2.14286	2.73333	1.11321	1.27344	1.69286	0.947368	0.756944	0.506849	0.863158	1.10145	1.10417	0.369048	0.625	1.47692	1.48315	1.75758	1.33628	1.05806	1.19266	1.48485	0.330357	0.597315	0.148649	1.04795	3.55072	1.09302	1.31429	0.720779	1.68966	0.964286	1.2	0.764706	0.852459	0.468531	1.7971	1.01802	0.531469	1.36232	1.13514
CDKL2-10	CDKL2	x	0.852601	1.00958	1.05865	0.886975	0.973982	0.855914	0.966589	1.25093	1.17559	1.02772	0.808333	0.857542	1.05717	0.846392	0.770833	0.934805	0.89229	1.02976	0.761749	0.704797	0.879947	0.835222	0.838569	0.979682	1.14248	0.913891	0.549561	1.21597	0.83322	0.901174	1.38619	1.48531	0.930928	0.880516	0.987421	0.870677	0.972554	1.24672	0.9875	1.53917	1.05695	1.02498	1.45914	1.0037	0.852623
CDKL2-2	CDKL2	x	0.924205	0.690773	0.74124	0.873278	1.01149	0.813514	0.872549	0.834343	0.959677	0.732577	0.69936	0.975191	0.863014	0.588235	0.911227	0.987952	1.10638	1.13372	0.732227	0.939716	0.925424	0.993492	1.21174	0.817787	1.01691	0.730435	0.482818	1.02114	0.79562	0.75	1.20497	1.16369	1.14541	0.687107	0.710974	0.934629	1.0817	1.02083	0.88141	0.562105	0.826087	1.03717	0.427368	0.77668	0.405204
CDKL2-3	CDKL2	x	1.11667	1.64526	0.582677	0.997573	1	0.997416	1.03186	1.01486	1.72888	1.16968	1.31341	0.94575	0.691837	0.732861	0.519573	0.612981	1.23174	1.45079	0.740741	0.797297	0.848485	1.06181	0.860465	0.954825	0.789931	0.557823	0.963235	0.853081	0.916538	0.922456	0.392265	1.20519	0.662687	0.900763	1.06061	0.615476	0.665672	0.657143	1.03106	1.03004	0.824427	1.12805	1.04077	1.24809	1.23577
CDKL2-4	CDKL2	x	0.942982	0.811494	1.27685	1.08	1.02913	1.12912	1.0193	1.55679	1.67325	1.1501	0.976959	1.2457	0.703046	0.862613	0.908434	1.09701	0.94023	1.17954	1.43671	0.870968	1.13333	1.33539	1.47556	1.21255	0.99179	1.4183	0.954741	1.08527	1.22436	1.20202	1.14167	1.60229	1.51979	0.886914	1.18548	1.07304	0.837681	1.06607	0.742782	1.39655	1.3322	1.20638	1.36379	1.01363	1.05369
CDKL2-5	CDKL2	x	1.52183	0.911538	1.31678	0.871166	1.1618	0.959551	0.949833	1.45472	1.13281	1.22093	1.34722	1.0245	1.16802	0.874363	0.911504	0.8	1.07089	1.11061	0.955939	0.865731	1.19298	1.08048	0.833333	1.01636	1.11274	1.31438	0.987069	1.05797	1.17899	0.954545	1.57221	1.59959	0.400391	0.837241	1.05029	1.21866	1.13095	0.981221	0.947126	0.76378	0.920068	1.31135	0.875591	1.11735	1.71472
CDKL2-6	CDKL2	x	0.932075	0.578397	0.53169	1.01942	0.846154	0.831169	0.733138	1.08668	1.11825	0.910891	0.904177	0.907923	0.93007	0.693141	0.685237	1.04207	1.17143	1.36	0.989399	1.1125	1.53975	0.958115	1.04233	0.827128	0.953964	0.723658	1.74142	0.656604	1.07539	1.25951	0.877049	0.4	0.972028	1.54545	0.583045	0.849462	1.16601	1.05224	1.27935	0.982507	0.91133	0.519608	1.0379	1.04926	0.639706
CDKL2-7	CDKL2	x	0.908854	1.06699	0.501188	0.965174	1.04545	0.941725	1.07839	1.07607	0.998198	1.2265	1.14068	0.846583	0.968481	0.655738	1.04478	0.901099	0.842697	1.18535	0.819444	0.739407	0.761084	1.04703	0.601436	0.722127	1.12154	1.33679	1.1954	1.28271	1.23121	1.54751	1.03935	1.33763	0.750524	0.933333	1.37955	0.818038	0.849383	0.85	0.986772	1.67808	0.897112	0.873544	1.80993	1.10289	0.936772
CDKL2-8	CDKL2	x	1.05921	1.25309	1.08817	0.862275	0.968421	1.04626	1.05753	0.870536	1.57692	1.16366	1.37209	0.859536	1.43579	1.21263	1.13655	1.04775	1.08918	0.983936	0.973415	1.56919	1.3562	1.03315	1.82961	1.21863	1.45135	0.88518	1.35227	1.11187	1.1425	1.20166	2.2217	1.29167	2.3125	1.125	1.21709	1.10086	1.16479	1.25977	1.25676	1.05199	1.04085	1.03501	0.577123	1.28431	1.12745
CDKL2-9	CDKL2	x	1.16927	0.715203	1.0922	0.789011	0.848276	0.889908	0.850772	0.75816	1.20321	0.796322	0.920068	1.04601	0.818882	0.696653	0.710526	0.94926	0.879733	0.739514	0.761337	0.68984	0.629454	0.741107	0.912381	1.04594	0.967267	0.941957	1.54066	1.22288	1.16799	1.00134	0.967803	1.84086	0.833333	1.09609	0.872504	0.852573	0.635071	0.495169	0.910448	0.667707	0.851623	0.991392	0.75039	0.8949	1.11191
CDKL3-1	CDKL3	x	1.06414	0.889163	1.0881	1.13546	0.89434	1.09985	0.80908	1.02523	1.20343	0.978363	1.06209	1.20329	0.86604	0.981675	1.19505	0.942895	1.19937	0.683453	1.31599	1.125	1.00275	0.954343	1.09617	0.980687	1.13036	0.985573	1.10707	1.16422	1.04728	1.4002	1.18152	0.980983	0.998505	0.858757	1.17043	1.04651	1.06768	1.05396	1.00825	1.12435	1.17052	1.07566	0.909091	1.19488	1.15789
CDKL3-10	CDKL3	x	0.887719	0.961794	1.40747	1.0302	0.988258	1.10057	1.19415	1.16401	1.04373	1.15487	1.24485	0.98573	1.1825	1.12451	0.998267	1.19476	1.06703	1	1.23239	1.27232	1.5235	1.30066	1.16789	1.05308	2.03929	1.41337	0.738208	1.19488	0.988671	1.01162	1.37276	0.636511	1.0311	1.1865	1.21546	1.07068	0.887755	1.31801	1.02873	2.02011	0.757831	0.897407	2.07909	0.596386	0.712514
CDKL3-11	CDKL3	x	0.984526	1.47441	0.878981	0.994071	1.14831	0.956349	1.17049	1.30097	1.2089	1.48939	1.38462	1.44789	1.47515	1.19231	1.48203	1.10684	1.28571	0.94186	1.54819	1.93317	1.51288	1.29331	1.5712	1.566	1.57793	1.19023	1.61597	1	0.918136	1.57337	1.52484	1.03217	1.52555	1.26597	1.36388	1.35069	1.25298	1.68984	1.90299	1.32175	1.97601	0.886256	1.96828	1.49025	0.883096
CDKL3-12	CDKL3	x	0.837209	0.85	1.48276	0.815534	0.930233	0.721154	0.514925	0.479675	0.607843	0.592308	1.29661	0.991803	0.471014	0.568627	0.626374	0.329268	0.826087	1.20779	0.818182	0.270073	0.354839	0.836066	0.765152	0.61157	0.681818	1.90541	0.828283	0.993464	0.946309	1.53968	1.17188	0.330097	0.808219	1.15924	2.26154	0.873737	1.01389	0.868421	0.522727	0.666667	0.767123	0.217742	0.289855	0.294521	0.370968
CDKL3-13	CDKL3	x	1.17073	1.22145	0.503731	0.794425	0.952	0.9	0.894309	0.82807	0.691083	1.22053	0.885475	1.23868	0.793103	0.718182	0.808989	1.47853	0.589641	0.818966	1.15084	0.836066	0.951923	1.39339	0.859375	1.1227	0.958175	0.60687	0.873817	1.4772	0.671388	0.833787	0.761261	2.67811	0.685259	0.934066	0.485089	0.954654	0.82439	0.950249	1.343	1.07251	1.42642	0.619529	1.20544	1.78868	0.824916
CDKL3-2	CDKL3	x	0.859684	1.08726	0.735675	1.01996	0.89858	0.869215	0.857369	0.752988	0.942359	1.04353	0.748082	0.812339	1.06637	0.875217	1.01075	0.792642	0.942761	0.876636	0.695481	0.626667	0.767821	0.734114	0.6546	0.786395	1.23934	1.15501	1.08839	1	1.03538	1.08381	1.09862	1.12934	1.00349	0.941482	0.993684	1.1563	1.02929	0.924855	0.956778	0.71875	1.17007	1.03506	0.84375	1.35102	0.753049
CDKL3-3	CDKL3	x	1.50425	1.26895	1.14123	0.899796	0.961798	0.879271	0.747331	1.09777	0.617834	0.862426	1.25273	0.985149	0.965964	0.860417	1.45408	0.601896	0.812207	0.858156	1.24149	0.679045	1.09091	0.788168	1.00568	1.15739	1.2693	2.18283	1.11168	1.23948	0.957983	0.947222	1.32538	1.0275	1.35354	0.778582	0.935714	0.755725	1.00549	0.897019	1.40719	0.596284	1.0872	1.16319	0.709459	1.20594	0.99241
CDKL3-4	CDKL3	x	1.17021	1.03543	0.656958	1.05047	1.35117	0.884298	1.06479	1.07182	0.78211	0.815789	1	1.20921	0.997275	1.18956	1.09938	1.38095	1.14346	0.860317	1.06032	0.900662	1.03367	1.00517	0.792208	1.11733	0.708405	1.09694	0.886076	1.13814	1.44397	1.10596	0.921824	0.907121	0.638191	1.04883	1.20807	0.62867	0.77592	0.691176	0.650177	1.0582	1.58873	0.833333	1.39153	1.98028	1.00995
CDKL3-5	CDKL3	x	0.919149	1.15228	0.64486	1.46541	1.1165	1.28205	0.774648	1.29864	1.01762	1.43636	1.416	1.12342	0.700337	0.913462	1.36709	1.13669	1.88205	1.39053	1.54478	2.26429	1.31138	1.308	1.60825	0.780142	1.59799	0.578231	1.88559	0.831858	1.07595	1.28814	0.922619	1.16265	0.872727	0.754491	1.39695	0.884615	1.67429	1.13889	1.44253	0.816514	1.36866	1.01667	1.25382	1.08756	1.02
CDKL3-6	CDKL3	x	0.627178	1.04144	1.06791	0.93737	0.908778	1.0259	1.12273	1.1296	0.823056	1.26558	0.81941	0.97013	0.950185	0.943485	0.816254	0.908088	0.671698	0.639623	0.706329	1.17105	0.854348	0.682589	0.695253	0.603591	0.539228	1.2186	1.0264	1.29733	0.968047	0.990419	1.69231	1.31655	0.898917	0.878197	0.905935	0.929178	0.839367	1.21975	1.0167	1.14541	0.770574	1.17282	0.791418	0.804239	0.940633
CDKL3-7	CDKL3	x	0.665025	1.34426	0.729592	1.01299	1.11009	1.18269	1.08547	1.05738	0.607143	0.9	0.848739	0.955631	1.37714	1.04128	1.20283	1.04571	1.13497	0.982036	1.51807	1.57068	1.22705	1.35338	1.28826	1.00306	1.27823	1.99052	0.907407	1.10563	1.02778	0.792899	1.17766	0.640449	0.829897	0.888235	1.27917	1.42183	0.851648	1.19333	1.52973	0.414508	0.954248	1.31343	0.300518	0.683007	0.94403
CDKL3-8	CDKL3	x	1.14939	1.31457	1.17526	1.4	1.21849	0.829787	0.824601	0.828418	1.32845	1.25714	0.691406	0.952083	1.30241	1.16226	1	0.978593	0.856618	0.835913	0.958015	0.660959	0.781145	0.597826	0.774882	0.969444	0.741641	0.460621	1.67235	1.12051	0.995556	1.06615	1.34821	0.505263	0.729469	0.510802	0.751012	0.992874	0.877395	1.04247	1.05394	0.573696	1.625	1.48256	0.736961	1.8125	1.4593
CDKL3-9	CDKL3	x	1.07692	1.08137	1.08215	1.11285	1.14066	0.937829	1.04092	1.275	0.880875	1.34996	1.12833	1.34578	1.02542	0.942915	1.07407	1.40418	1.43093	0.942116	1.72996	1.27945	1.22197	1.14299	1.23902	1.24353	0.990934	1.55863	1.62771	1.25	1.16878	1.19278	1.18203	1.1128	1.06445	0.917565	0.959199	1.04716	1.32503	1.24173	1.10564	1.31818	1.18928	1.07692	1.5314	1.09129	1.05651
CDKL4-1	CDKL4	x	2.01942	1.45455	0.918605	1.07627	1.73134	0.944444	0.634146	1.57576	1.35088	1.23256	0.88535	0.770701	1.89908	0.735294	1.28696	1.71698	0.43038	2.84615	1.21429	1.1358	1.25	0.984496	0.773723	1.51515	1.01835	1.50725	3.92	1.16438	1.04	1.07059	0.651163	0.185567	0.192	0.994382	1.27273	0.840183	2.0625	1.2069	1.55844	0.527132	0.63125	1.38406	1.04651	0.40625	1.47101
CDKL4-10	CDKL4	x	0.701468	1.17201	1.20934	0.988717	1.09236	1.18182	0.90544	0.938326	0.977273	1.03318	1.25911	1.13087	1.09392	1.23025	0.907543	1.01408	1.31737	1.25714	1.28237	1.28267	1.18447	1.25455	1.14899	1.02548	1.40183	1.0291	1.10097	1.02189	0.931346	1.1016	0.988871	1.05616	1.49266	0.798658	1.00372	0.960961	1.11878	0.989813	1.03079	0.854241	1.03281	0.956473	0.751493	0.644796	1.26451
CDKL4-2	CDKL4	x	1.31898	1.53224	0.696503	1.13674	1.07951	1.16085	1.39602	1.20772	1.31741	1.04124	1.09458	1.20437	1.23148	1.29443	1.07755	0.925558	1.07984	1.41067	1.43553	1.6223	1.2766	1.31474	1.11786	1.27928	1.10531	1.30545	1.07909	1.10697	1.08712	1.4111	1.87606	0.641161	1.35269	1.18354	1.22358	1.04328	0.91954	1.06277	1.29208	1.97578	1.17913	1.39976	3.40138	1.3061	1.64741
CDKL4-3	CDKL4	x	0.936681	1.08685	1.44	1.13692	1.01907	1.23129	1.24696	0.61838	0.98145	1.08367	1.00987	0.982313	1.27009	1.09641	1.16068	1.13333	1.02956	1.13163	1.34368	0.772532	1.03837	1.06196	1.02646	1.06182	0.991004	1.26727	0.849057	1.21954	0.723735	0.917553	1.67835	1.30982	1.11632	1.29365	1.40145	1.2	1.20597	1.00735	1.0665	2.06667	1.42623	1.09943	2.42883	1.73975	0.954111
CDKL4-4	CDKL4	x	0.859402	1.03872	1.28157	0.923423	1.21394	1.01567	1.22787	1.23342	1.36686	1.54603	1.18016	0.98364	1.13901	0.982009	1.10795	1.278	1.32337	1.07881	1.13447	0.972414	1.03919	1.1329	1.21673	1.21812	1.27357	1.21739	1.12101	1.00204	1.416	0.876115	1.08293	1.2025	1.0128	1.11199	0.936722	1.1918	1.08423	1.23435	0.954545	0.959688	0.956471	0.81872	1.30429	0.951765	0.81872
CDKL4-5	CDKL4	x	1.13404	1.65217	1.325	1.13524	1.16566	0.859649	2.27768	1.21865	1.1984	1.35665	1.16338	1.53165	1.37112	1.2306	1.55086	1.48096	1.28633	1.27692	1.21881	1.30425	1.76773	1.58251	1.33671	1.27385	2.00346	1.29272	0.913363	1.01014	0.862944	1.36694	1.11855	1.95363	1.02251	1.0766	1.25348	1.43012	1.44976	1.4806	1.51748	0.777135	1.03664	0.853695	0.681621	0.835115	0.723982
CDKL4-6	CDKL4	x	0.525333	1.27446	0.860681	1.02941	0.990196	0.967456	1.19593	1.21801	0.781775	0.875926	1.10841	0.882231	1.21481	1.1646	1.82906	1.20189	1.08978	1.1003	0.84965	1.09253	0.962069	1.11685	1.37903	1.19263	1.0022	0.870324	0.835548	1.1661	0.875	0.987448	0.307918	0.497126	0.842818	1.19213	0.73431	0.741627	0.890785	1.30189	0.790476	1.19737	1.28889	0.371158	0.991228	1.09136	0.333333
CDKL4-7	CDKL4	x	1.1427	0.97819	0.960337	1.13172	1.17738	1.06564	1.44366	1.42722	1.5464	1.19452	1.29159	1.23621	1.27273	1.02299	1.26522	1.1864	1.33562	1.44183	1.45328	1.22733	1.40331	1.158	1.37874	1.58029	1.07014	1.00372	1.21465	1.08837	0.952174	1.11343	1.04944	1.3052	0.959538	1.23623	1.04628	1.32744	1.45521	1.45006	1.18119	1.03635	1.36531	1.83184	0.969569	1.61822	1.69731
CDKL4-8	CDKL4	x	0.995733	1.36641	1.15022	1.18985	0.958924	0.998549	1.27184	1.38503	1.39735	1.27604	1.23462	1.46681	1.19551	1.13571	1.52564	1.55365	1.14556	1.01994	1.59272	1.26916	1.62143	1.23558	1.54107	1.68462	1.14483	1.13244	1.01356	1.23041	1.30354	1.41522	1.20056	1.26829	1.10911	1.22759	1.17885	1.05556	1.22948	1.66207	1.22046	0.596819	1.30737	1.08166	0.82507	1.41263	1.42282
CDKL4-9	CDKL4	x	1.64365	1.24762	1.19763	1.0609	1.03628	1.08216	1.11446	1.10128	1.19593	1.14803	0.994776	1.18665	0.861611	1.05687	1.20263	1.25837	0.880835	1.05857	1.1992	1.29179	1.34409	1.2553	1.14225	1.1462	0.878637	0.889731	0.939726	1.15206	0.997537	1.21314	1.10125	0.536341	1.01017	0.863101	0.749032	1.24613	1.01796	1.42922	1.06481	0.938144	1.1362	1.083	0.851921	1.11609	1.21344
CDKL5-1	CDKL5	x	0.904018	0.933649	1.05081	1.34644	0.982684	1.18059	1.142	1.13058	1.14261	1.28792	1.04459	1.00397	1.30354	1.08081	1.33257	1.54591	1.12639	1.01699	1.82245	0.88743	1.29442	1.41021	1.22449	1.51254	1.65231	1.26838	0.758916	1.08616	1.05099	1.23199	1.17684	0.610063	1.31148	1.14207	1.15789	0.935723	1.4695	1.40816	1.61648	0.673145	0.901893	0.843602	0.812721	0.645439	0.870458
CDKL5-10	CDKL5	x	1.10671	1.21385	1.69473	1.09031	1.14883	1.33965	1.17413	1.25096	1.27478	1.29457	1.14815	0.997347	1.36522	1.89357	1.32481	1.42715	1.29792	1.30387	1.63542	1.42428	1.56662	1.31725	1.68522	1.44156	1.34777	1.18455	1.03926	1.08011	1.18199	1.06545	0.99157	1.34842	1.02964	1.21483	1.6493	1.28906	1.49686	1.28025	1.19306	1.31417	1.56122	1.00967	1.36113	1.91837	1.17678
CDKL5-11	CDKL5	x	1.3369	1.14554	1.2716	1.14368	1.5679	1.19883	1.19343	2.36667	0.787313	1.13383	1.62882	1.61977	1.0339	1.26404	1.76761	1.03241	1.47305	0.865672	1.36111	1.36184	1.16418	1.42326	0.995633	1.18981	1.65984	1.03644	0.653374	1.91386	1.10667	0.792453	0.455621	1.58011	0.59887	1.52256	1.23279	1.09639	2.00741	2	1.85065	0.72103	0.755556	1.07721	1.12876	0.466667	0.452206
CDKL5-2	CDKL5	x	0.854167	1.21605	1.24867	0.976087	1.04574	0.911602	0.844106	1.17647	0.71028	0.825218	1.13695	1.10836	1.20833	1.24096	1.11937	0.926554	0.807504	1.04528	0.978218	1.40049	1.24486	0.818182	0.916786	1.14038	1.3567	1.29316	0.962319	0.968028	1.11765	0.819475	1.22167	1.17843	1.4188	0.797315	0.963016	0.884574	1.01593	1.19756	0.901257	1.00916	0.62938	0.510801	0.786649	0.84097	1.03939
CDKL5-3	CDKL5	x	0.785	0.51341	1.09639	0.851562	0.970954	1.02404	0.87963	0.848214	0.894958	0.954301	1.34675	1.13754	0.916256	0.939394	0.966942	0.73262	0.76	0.721951	1.02793	1.19883	1.02575	1.36552	1.3617	1.1597	2.16923	1.30544	0.988208	0.968927	0.867987	0.854305	0.659686	1.35023	1.20188	1.15864	0.981873	1.02305	1.58696	1.13497	1.36872	0.682482	0.770751	0.393382	0.208029	0.177866	0.305147
CDKL5-4	CDKL5	x	1.0195	0.709497	0.369628	1.21147	1.08683	1.10056	0.938679	1.1347	1.10998	1.42048	1.07516	1.25758	1.12286	1.4564	1.16009	1.54514	1.02181	1.27152	1.20857	1.28996	1.52581	1.00704	1.17812	1.12615	1.1543	0.960239	1.73651	1.26938	0.937037	1.26577	0.794444	1.27826	1.02695	1.08228	0.924623	1.25926	1.61151	1.25	1.08681	1.4359	1.18056	0.88563	1.10256	1.58565	1.26979
CDKL5-5	CDKL5	x	1.23181	1.56657	1.4864	0.828283	1.05995	1.31579	1.1087	1.09778	1.02542	1.13225	1.16514	1.26541	0.962871	1.57584	0.97235	1.13399	1.2168	1.4526	1.42908	1.68977	1.45333	1.09586	1.35294	1.16364	1.59267	1.1376	1.5527	0.902655	1.2085	0.81388	1.00246	1.99104	1.74925	1.04792	1.01389	1.61728	0.957187	1.61511	1.1125	1.49145	0.959574	1.00248	1.01923	1.14043	0.975186
CDKL5-6	CDKL5	x	1.69703	1.22638	1.35827	1.02208	1.2988	1.15198	1.80885	1.58951	1.2963	1.71518	1.48895	1.36807	1.78837	1.43694	1.40594	1.37917	1.25836	1.07202	1.50228	1.39729	1.65672	1.29926	1.37566	1.3127	1.53107	1.41831	1.54286	1.10479	1.35608	1.20648	0.992157	1.51654	1.81837	1.2901	1.53833	0.961326	1.33489	1.67586	1.12705	1.04797	1.07976	1.14883	1.03924	1.08715	1.1671
CDKL5-7	CDKL5	x	1.28092	1.65133	1.52324	0.883621	1.15453	1.09621	1.37583	1.13901	1.13622	1.92653	1.46113	1.37363	1.33846	1.67204	1.33236	1.58889	1.23946	0.982704	1.33863	1.42238	1.23103	1.4802	1.39	1.16407	1.25384	0.882051	1.22613	1.1341	1.28223	1.20395	1.13285	1.8671	1.23871	1.08957	1.1449	1.0891	1.42455	1.44902	1.26763	1.16014	1.2582	0.980867	1.04032	1.65478	0.906888
CDKL5-8	CDKL5	x	1.24771	1.95779	0.926154	1.0338	0.940054	1.20917	0.836066	0.905263	1.17754	1.40485	1.39304	1.22593	0.923645	0.866348	1.60822	1.01058	1.58389	1.54354	1.2386	1.02011	1.76327	1.20096	1.63212	1.40263	0.710247	1.46532	1.34783	0.930757	0.898687	1.12868	1.25068	1.21069	0.623494	1.35167	1.30909	0.869903	1.32031	1.25338	1.13356	0.746392	1.3164	1.06138	0.901031	1.2679	1.14322
CDKL5-9	CDKL5	x	1.21103	1.7756	1.5729	1.33428	1.15651	1.09974	1.20147	1.12087	1.07205	1.39912	1.17664	1.04769	1.2809	1.19951	1.5625	1.17716	1.53804	1.01503	1.10568	1.21081	1.24167	1.38595	0.99705	1.21608	1.15337	1.0811	0.929051	1.25599	1.07137	0.973247	1.61397	1.15493	1.23077	1.07507	1.08795	1.29083	1.01803	1.41473	1.50596	1.03418	1.52122	1.0189	1.19238	1.24448	1.22772
CHEK1-1	CHEK1	x	0.568323	0.263333	0.370242	1.11702	0.898462	0.881503	0.479115	0.497462	0.460432	0.622172	0.539112	0.587549	1.20064	0.976821	1.12881	0.310345	0.30303	0.358306	0.864286	0.427586	0.820946	0.438356	0.451187	0.5	0.396917	0.328685	0.506667	0.794411	0.831984	0.821154	0.145511	0.120482	0.0584416	0.37251	0.454545	0.777506	0.293388	0.271062	0.519573	1.03678	0.497642	0.683616	0.673563	0.787736	0.353107
[truncated: 4,954 more rows]
